# Supplementary material for: Deep-learning segmentation and multi-ancestry GWAS enhance genetic discovery of the cerebellum
Source: Research Square preprint supplement (doi:10.21203/rs.3.rs-6694135/v1), 2025-06-09
Supplement: Supplementary file 1 [file 1087fcaa018a24a10ac7c16f.xlsx]

## Sheet: Contents
Contents
Table S1. Demographic and cerebellar volumetric data of participants from four subgroups.
Table S2. The test-retest reliability of cerebellar substructure volumes.
Table S3. Participants, traits, genetic variants, LD references, and GRM files included in different univariate GWASs.
Table S4. The SNP-based heritability (h2) estimates of 30 cerebellar substructure volumes obtained by two segmentation methods across four subgroups.
Table S5. The significant variant-trait associations (P < 5 × 10-8) of 30 cerebellar substructures volumes obtained by two methods in UK Bionbank dataset.
Table S6. The PGS predictive performance of 30 cerebellar substructure volumes obtained by two segmentation methods in three target datasets.
Table S7. The population straitification of each GWAS.
Table S8. Significant variant-trait associations and locus-trait associations in sex-combined single-dataset GWASs (P < 1.61 × 10-9).
Table S9. Significant independent signals and loci in sex-combined single-dataset GWASs (P < 1.61 × 10-9).
Table S10. Significant variant-trait associations and locus-trait associations in sex-combined EUR-GWAS meta-analyses (P < 1.61 × 10-9).
Table S11. Significant independent signals and loci in sex-combined EUR-GWAS meta-analyses (P < 1.61 × 10-9).
Table S12. Significant variant-trait associations and locus-trait associations in sex-combined cross-ancestry EUR-EAS-GWAS meta-analyses (P < 1.61 × 10-9).
Table S13. Significant independent signals and loci in sex-combined cross-ancestry EUR-EAS-GWAS meta-analyses (P < 1.61 × 10-9).
Table S14. Significant variant-trait associations and locus-trait associations in sex-combined cross-ancestry EUR-EAS-AFR-GWAS meta-analyses (P < 1.61 × 10-9).
Table S15. Significant independent signals and loci in sex-combined cross-ancestry EUR-EAS-AFR-GWAS meta-analyses (P < 1.61 × 10-9).
Table S16. The pooled significant variant-trait and locus-trait associations in sex-combined univariate GWASs (P < 1.61 × 10-9).
Table S17. The pooled significant independent signals and loci in sex-combined univariate GWASs (P < 1.61 × 10-9).
Table S18. The pooled significant variant-trait and locus-trait associations in male-specific univariate GWASs (P < 1.61 × 10-9).
Table S19. The pooled significant independent signals and loci in male-specific univariate GWASs (P < 1.61 × 10-9).
Table S20. The pooled significant variant-trait and locus-trait associations in female-specific univariate GWASs (P < 1.61 × 10-9).
Table S21. The pooled significant independent signals and loci in female-specific univariate GWASs (P < 1.61 × 10-9).
Table S22. The pooled significant loci in sex-combined multivariate GWASs (P < 5 × 10-8).
Table S23. The pooled significant loci in male-specific multivariate GWASs (P < 5 × 10-8).
Table S24. The pooled significant loci in female-specific multivariate GWASs (P < 5 × 10-8).
Table S25. Ancestry-shared and ancestry-specific associations in 1,606 variant-trait associations included in allele-effect heterogeneity analyses across three ancestries based on sex-combined GWASs.
Table S26. Sex-shared and sex-specific associations in 630 variant-trait associations included in allele-effect heterogeneity analyses between sexes based on sex-stratified GWASs.
Table S27. The 95% credible sets identified in single-ancestry fine-mapping analyses based on significant locus-trait associations in EUR-GWASs.
Table S28. The 95% credible sets identified in cross-ancestry fine-mapping analyses based on significant locus-trait associations in EUR-EAS-GWASs.
Table S29. The 95% credible sets identified in cross-ancestry fine-mapping analyses based on significant locus-trait associations in EUR-EAS-AFR-GWASs.
Table S30. Causal variants (PP > 0.8) identified by single-ancestry statistical fine-mapping analyses based on significant locus-trait associations of EUR-GWASs.
Table S31. Causal variants (PP > 0.8) identified by cross-ancestry statistical fine-mapping analyses based on significant locus-trait associations of EUR-EAS-GWASs.
Table S32. Causal variants (PP > 0.8) identified by cross-ancestry statistical fine-mapping analyses based on significant locus-trait associations of EUR-EAS-AFR-GWASs.
Table S33. The comparison of statistical fine-mapping for locus-trait associations in EUR-GWASs, EUR-EAS-GWASs, and EUR-EAS-AFR-GWASs with one causal variant assumption.
Table S34. Colocalizations (PP.H4 > 0.8) between loci associated with cerebellar volumetric traits and eQTL in cerebellar tissue.
Table S35. All pathways included in the enrichment analyses of prioritized causal genes.
Table S36. The genetic correlation betweem each pair of 27 cerebellar substructures volumes.
Table S37. Factor loadings for the optimal nine-factor EFA model derived from the genetic correlation matrix of 27 cerebellar substructure volumes.
Table S38. Behavioral phenotypes included in PGS-PheWAS.
Table S39. Results of PGS-PheWAS.
Table S40. Resources of GWAS summary statistics of ten neuropsychiatric disorders.
Table S41. Genetic correlations between 31 cerebellar volumetric traits and ten neuropsychiatric disorders.
Table S42. Colocalizations (PP.H4 > 0.8) between loci associated with cerebellar volumetric traits and ten neuropsychiatric disorders.
Table S43. Multi-trait colocalizations among the loci associated with cerebellar volumetric traits, eQTLs in cerebellar tissue, and neuropsychiatric disorders.

## Sheet: TableS1
Table S1. Demographic and cerebellar volumetric data of participants from four subgroups.
Variable	UKBBEUR			ABCDEUR			CHIMGENEAS			ABCDAFR
	All	Male	Female	All	Male	Female	All	Male	Female	All	Male	Female
Number of participants	40826	19347	21479	5808	3039	2769	7083	2504	4579	3354	1723	1631
Age (years)	63.963 ± 7.682	64.658 ± 7.791	63.564 ± 7.464	9.928 ± 0.629	9.946 ± 0.631	9.908 ± 0.626	23.680 ± 2.480	23.553 ± 2.663	23.749 ± 2.371	9.904 ± 0.630	9.911 ± 0.630	9.895 ± 0.630
Sex (Male/Female)	19,347/21,479	19,347/0	0/21,479	3,039/2,769	3,039/0	0/2,769	2,504/4,579	2,504/0	0/4,579	1,723/1,631	1,723/0	0/1,631
TIV (mm3)	1,548,385.177 ± 153,198.073	1,640,328.988 ± 133,292.759	1,465,352.882 ± 118,706.900	1,518,115.532 ± 129,640.337	1,580,382.806 ± 116,941.560	1,450,896.501 ± 108,338.361	1,538,212.599 ± 146,048.830	1,652,509.128 ± 127,921.665	1475710.194 ± 114006.375	1,455,741.004 ± 131,674.395	1,514,408.029 ± 122,869.859	1,394,524.358 ± 111,095.665
Left-Cerebellum-White-Matter (mm3)	13,176.292 ± 1,683.250	13,913.439 ± 1,659.983	12,510.592 ± 1,403.491	12,529.107 ± 1,313.939	12,891.555 ± 1,304.741	12,133.113 ± 1,218.500	12,953.334 ± 1,301.767	13,604.990 ± 1,280.864	12,596.979 ± 1,168.415	12,298.515 ± 1,342.347	12,633.268 ± 1,338.282	11,949.214 ± 1,254.996
Right-Cerebellum-White-Matter (mm3)	13,192.877 ± 1,672.452	13,967.158 ± 1,633.562	12,493.643 ± 1,372.207	12,522.332 ± 1,309.322	12,898.945 ± 1,300.987	12,111.074 ± 1,200.968	13,063.170 ± 1,332.515	13,775.091 ± 1,294.427	12,673.861 ± 1,184.008	12,256.855 ± 1,336.439	12,605.082 ± 1,330.987	11,893.494 ± 1,242.317
Left-Cerebellum-Cortex (mm3)	46,542.918 ± 4,819.616	48,481.600 ± 4,717.710	44,792.139 ± 4,200.922	50,434.598 ± 4,710.396	52,348.906 ± 4,456.196	48,369.481 ± 4,079.225	46,835.104 ± 4,257.743	49,051.480 ± 4,125.572	45,623.092 ± 3,818.637	48,065.910 ± 4,769.811	49,885.883 ± 4,556.684	46,166.843 ± 4,215.382
Right-Cerebellum-Cortex (mm3)	47,299.518 ± 4,992.080	49,471.762 ± 4,840.735	45,337.815 ± 4,260.979	49,920.359 ± 4,726.685	51,872.254 ± 4,455.473	47,826.088 ± 4,084.246	47,091.247 ± 4,348.445	49,549.765 ± 4,175.775	45,746.821 ± 3,821.512	47,598.049 ± 4,763.745	49,433.845 ± 4,539.153	45,682.469 ± 4,206.450
Cbm_Vermis (mm3)	5,440.590 ± 587.039	5,685.578 ± 566.554	5,219.347 ± 512.655	5,370.952 ± 561.720	5,566.899 ± 530.079	5,153.333 ± 512.704	5,019.122 ± 522.863	5,317.935 ± 487.702	4,855.717 ± 466.184	5,188.868 ± 573.602	5,382.485 ± 563.980	4,986.835 ± 510.505
Cbm_total (mm3)	125,651.895 ± 12,937.187	131,514.963 ± 12,462.811	120,357.096 ± 10,916.881	130,777.349 ± 11,928.293	135,578.558 ± 11,272.873	125,593.089 ± 10,397.202	124,961.977 ± 11,004.255	131,299.262 ± 10,436.976	121,496.469 ± 9,684.583	125,408.196 ± 12,100.407	129,940.564 ± 11,564.688	120,678.855 ± 10,765.323
Cbm_Left_I_IV (mm3)	3,056.021 ± 410.440	3,214.530 ± 408.931	2,912.875 ± 355.532	3,080.229 ± 399.597	3,232.617 ± 381.988	2,916.62 ± 350.331	3,141.248 ± 401.763	3,366.290 ± 397.559	3,018.185 ± 347.041	2,966.318 ± 408.131	3,120.069 ± 399.934	2,805.886 ± 350.897
Cbm_Right_I_IV (mm3)	3,026.702 ± 410.551	3,184.154 ± 410.306	2,884.510 ± 355.151	3,085.873 ± 408.006	3,246.257 ± 387.437	2,911.563 ± 355.37	3,121.717 ± 401.898	3,348.389 ± 394.350	2,997.763 ± 348.385	2,983.520 ± 411.519	3,144.854 ± 397.892	2,815.174 ± 354.128
Cbm_Left_V (mm3)	3,311.255 ± 492.559	3,508.229 ± 488.699	3,133.372 ± 423.513	3,304.604 ± 457.457	3,454.538 ± 443.432	3,140.515 ± 412.839	3,515.926 ± 484.532	3,784.776 ± 477.952	3,368.907 ± 420.869	3,179.871 ± 464.525	3,322.830 ± 457.397	3,030.699 ± 423.247
Cbm_Right_V (mm3)	3,248.369 ± 496.858	3,474.525 ± 476.085	3,044.132 ± 420.981	3,230.425 ± 451.711	3,389.584 ± 438.904	3,055.12 ± 396.73	3,429.998 ± 484.868	3,728.611 ± 460.856	3,266.704 ± 414.875	3,093.245 ± 455.425	3,244.458 ± 446.623	2,935.461 ± 408.672
Cbm_Left_VI (mm3)	7,029.964 ± 1,044.448	7,185.455 ± 1,089.270	6,889.543 ± 981.326	7,665.784 ± 1,026.277	7,837.647 ± 1,053.211	7,476.871 ± 970.754	6,706.361 ± 922.826	6,923.728 ± 921.298	6,587.494 ± 901.864	7,145.530 ± 1,001.359	7,313.960 ± 1,023.818	6,969.779 ± 946.141
Cbm_Right_VI (mm3)	7,115.345 ± 1,079.097	7,267.630 ± 1,120.421	6,977.820 ± 1,021.059	7,506.310 ± 1,037.413	7,645.320 ± 1,065.086	7,352.425 ± 988.299	6,709.550 ± 940.066	6,874.229 ± 958.863	6,619.495 ± 917.310	6,970.032 ± 1,016.558	7,124.523 ± 1,043.176	6,808.828 ± 962.144
Cbm_Left_CrusI (mm3)	10,626.227 ± 1,587.016	10,976.348 ± 1,643.629	10,310.041 ± 1,463.858	11,954.032 ± 1,580.474	12,328.969 ± 1,588.936	11,548.364 ± 1,472.224	10,191.010 ± 1,343.371	10,565.364 ± 1,402.391	9,986.296 ± 1,264.068	11,329.100 ± 1,607.780	11,715.003 ± 1,633.087	10,926.425 ± 1,477.440
Cbm_Right_CrusI (mm3)	11,189.021 ± 1,696.720	11,662.174 ± 1,744.387	10,761.729 ± 1,531.695	12,071.701 ± 1,643.345	12,504.531 ± 1,643.416	11,610.855 ± 1,520.947	10,652.810 ± 1,430.729	11,157.435 ± 1,487.206	10,376.859 ± 1,319.805	11,503.411 ± 1,669.319	11,931.731 ± 1666.514	11,056.476 ± 1,551.213
Cbm_Left_CrusII (mm3)	6,313.554 ± 1,117.413	6,541.071 ± 1,136.794	6,108.089 ± 1,058.418	7,692.345 ± 1,230.289	7,996.662 ± 1,246.943	7,374.98 ± 1,131.214	7,029.238 ± 1,077.605	6,965.921 ± 1,076.395	7,063.862 ± 1,076.810	7,212.564 ± 1,204.281	7,496.471 ± 1,213.921	6,916.318 ± 1,120.117
Cbm_Right_CrusII (mm3)	6,586.349 ± 1,214.641	6,845.296 ± 1,236.724	6,352.500 ± 1,145.115	7,796.197 ± 1,222.291	8,118.758 ± 1,235.800	7,473.163 ± 1,120.343	7,344.329 ± 1,106.959	7,394.236 ± 1,137.179	7,317.037 ± 1,089.237	7,378.387 ± 1,214.708	7,682.721 ± 1,207.112	7,060.828 ± 1,139.202
Cbm_Left_VIIb (mm3)	4,684.603 ± 764.971	4,961.580 ± 764.956	4,434.471 ± 673.332	4,966.584 ± 676.384	5,163.183 ± 669.530	4,743.373 ± 613.031	4,579.252 ± 691.148	4,921.081 ± 704.026	4,392.326 ± 607.540	4,806.492 ± 672.512	4,989.297 ± 680.051	4,615.742 ± 608.723
Cbm_Right_VIIb (mm3)	4,474.123 ± 758.686	4,800.383 ± 755.160	4,179.484 ± 630.478	4,653.336 ± 614.943	4,836.464 ± 609.722	4,439.157 ± 549.893	4,351.710 ± 628.480	4,694.318 ± 630.214	4,164.357 ± 542.741	4,513.783 ± 603.076	4,667.383 ± 599.196	4,353.507 ± 564.268
Cbm_Left_VIIIa (mm3)	4,881.005 ± 796.298	5,169.109 ± 832.736	4,620.825 ± 661.707	5,237.534 ± 795.155	5,505.017 ± 784.887	4,937.304 ± 698.497	5,039.330 ± 760.181	5,527.897 ± 721.739	4,772.160 ± 638.118	5,101.100 ± 767.102	5,322.858 ± 762.683	4,869.705 ± 700.610
Cbm_Right_VIIIa (mm3)	4,869.365 ± 790.074	5,133.570 ± 816.510	4,630.768 ± 682.581	5,039.054 ± 757.497	5,283.756 ± 749.851	4,766.658 ± 669.407	4,800.680 ± 728.514	5,263.393 ± 694.976	4,547.647 ± 613.029	4,833.933 ± 720.714	5,031.275 ± 723.200	4,628.014 ± 657.902
Cbm_Left_VIIIb (mm3)	3,356.628 ± 508.838	3,523.389 ± 513.395	3,206.030 ± 454.891	3,161.444 ± 495.908	3,325.665 ± 487.467	2,979.81 ± 442.195	3,282.003 ± 491.811	3,487.506 ± 494.106	3,169.624 ± 452.728	3,066.129 ± 484.364	3,220.749 ± 481.711	2,904.789 ± 431.725
Cbm_Right_VIIIb (mm3)	3,514.039 ± 531.459	3,712.370 ± 535.469	3,334.931 ± 459.339	3,268.764 ± 492.107	3,441.729 ± 475.768	3,073.812 ± 438.769	3,336.806 ± 481.429	3,585.176 ± 460.649	3,200.987 ± 436.275	3,165.159 ± 480.946	3,330.493 ± 473.403	2,992.640 ± 424.982
Cbm_Left_IX (mm3)	2,752.299 ± 533.625	2,852.372 ± 554.522	2,661.925 ± 497.011	2,885.793 ± 532.751	2,991.915 ± 542.994	2,766.866 ± 497.85	2,818.095 ± 498.947	2,944.561 ± 514.964	2,748.938 ± 476.016	2,767.248 ± 537.198	2,876.961 ± 542.382	2,652.767 ± 507.141
Cbm_Right_IX (mm3)	2,763.595 ± 514.026	2,862.280 ± 533.163	2,674.475 ± 478.955	2,796.784 ± 509.070	2,907.440 ± 520.864	2,672.55 ± 469.099	2,815.247 ± 492.468	2,941.895 ± 504.549	2,745.989 ± 471.616	2,679.495 ± 502.570	2,783.740 ± 510.310	2,570.720 ± 470.452
Cbm_Left_X (mm3)	531.759 ± 83.873	550.098 ± 85.205	515.197 ± 79.080	494.819 ± 76.339	507.527 ± 78.557	481.478 ± 71.71	537.047 ± 77.315	563.392 ± 78.617	522.640 ± 72.669	493.532 ± 78.631	508.589 ± 79.306	477.820 ± 74.772
Cbm_Right_X (mm3)	512.983 ± 85.166	529.870 ± 86.948	497.733 ± 80.539	481.080 ± 76.308	493.397 ± 78.963	469.011 ± 71.543	532.493 ± 77.316	560.457 ± 78.293	517.200 ± 72.348	479.335 ± 79.421	493.449 ± 79.594	464.608 ± 76.530
Cbm_Vermis_VI (mm3)	1,640.360 ± 233.338	1,686.122 ± 236.931	1,599.033 ± 222.089	1,587.448 ± 223.312	1,628.020 ± 222.711	1,540.927 ± 215.276	1,392.591 ± 195.978	1,463.323 ± 195.010	1,353.912 ± 185.444	1,593.171 ± 238.672	1,635.935 ± 241.612	1,548.548 ± 227.189
Cbm_Vermis_VII (mm3)	686.557 ± 125.649	716.096 ± 128.706	659.881 ± 116.562	706.273 ± 124.516	727.219 ± 124.666	682.662 ± 119.814	687.789 ± 122.127	729.861 ± 123.055	664.781 ± 115.309	698.788 ± 131.002	723.060 ± 132.324	673.462 ± 124.696
Cbm_Vermis_VIII (mm3)	1,874.982 ± 278.006	1,999.096 ± 270.884	1,762.896 ± 233.121	1,883.223 ± 268.947	1,990.654 ± 252.547	1,763.84 ± 233.221	1,799.152 ± 250.372	1,934.834 ± 243.843	1,724.955 ± 221.106	1,745.382 ± 259.466	1,843.129 ± 256.713	1,643.387 ± 220.121
Cbm_Vermis_IX (mm3)	900.064 ± 121.612	938.333 ± 122.669	865.504 ± 109.726	865.554 ± 121.710	887.213 ± 123.184	841.376 ± 115.475	782.221 ± 105.543	822.508 ± 107.104	760.191 ± 97.914	827.246 ± 119.348	850.861 ± 121.970	802.605 ± 111.357
Cbm_Vermis_X (mm3)	338.658 ± 55.871	345.979 ± 57.713	332.046 ± 53.297	329.174 ± 52.361	333.355 ± 54.296	324.185 ± 49.572	357.747 ± 56.616	367.355 ± 57.723	352.492 ± 55.306	324.440 ± 54.657	329.527 ± 57.087	319.132 ± 51.479
Abbereviations: ABCD, the Adolescent Brain Cognitive Development study; AFR, African ancestry; Cbm, cerebellum; CHIMGEN, the Chinese Imaging Genetics study; EAS, East Asian ancestry; EUR, European ancestry; UKBB, the UK Biobank study, TIV, total intracranial volume.

## Sheet: TableS2
Table S2. The test-retest reliability of cerebellar substructure volumes.
Cerebellar volumetric traits	Intraclass correlation coefficient (ICC)
	UKBB (n = 2,944)	ABCD (n = 4,076)	CHIMGEN (n = 26)
Left-Cerebellum-White-Matter	0.921	0.881	0.902
Right-Cerebellum-White-Matter	0.915	0.891	0.881
Left-Cerebellum-Cortex	0.894	0.957	0.875
Right-Cerebellum-Cortex	0.89	0.947	0.813
Cbm_Vermis	0.897	0.962	0.928
Cbm_Left_I_IV	0.937	0.953	0.877
Cbm_Right_I_IV	0.943	0.955	0.909
Cbm_Left_V	0.94	0.917	0.897
Cbm_Right_V	0.937	0.937	0.955
Cbm_Left_VI	0.959	0.979	0.957
Cbm_Right_VI	0.956	0.979	0.912
Cbm_Left_CrusI	0.947	0.969	0.922
Cbm_Right_CrusI	0.944	0.965	0.891
Cbm_Left_CrusII	0.902	0.934	0.727
Cbm_Right_CrusII	0.897	0.938	0.695
Cbm_Left_VIIb	0.884	0.871	0.827
Cbm_Right_VIIb	0.888	0.887	0.799
Cbm_Left_VIIIa	0.9	0.906	0.871
Cbm_Right_VIIIa	0.89	0.895	0.795
Cbm_Left_VIIIb	0.892	0.92	0.817
Cbm_Right_VIIIb	0.885	0.908	0.764
Cbm_Left_IX	0.938	0.975	0.973
Cbm_Right_IX	0.935	0.969	0.945
Cbm_Left_X	0.878	0.876	0.718
Cbm_Right_X	0.88	0.873	0.624
Cbm_Vermis_VI	0.943	0.951	0.907
Cbm_Vermis_VII	0.937	0.967	0.952
Cbm_Vermis_VIII	0.917	0.975	0.952
Cbm_Vermis_IX	0.889	0.932	0.859
Cbm_Vermis_X	0.905	0.902	0.879
Abbereviations: ABCD, the Adolescent Brain Cognitive Development study; CHIMGEN, the Chinese Imaging Genetics study; UKBB, the UK Biobank study.

## Sheet: TableS3
Table S3. Participants, traits, genetic variants, LD references, and GRM files included in different univariate GWASs.
GWAS categories	Participants (Males/Females)	Cerebellar segementation methods	Traits invovled in segmentation method comparison	Trait invovled in formal GWASs	GWAS software	Genetic variants		LD reference			GRM
						Autosome	X-chromosome	All	Male	Female
Sex-combined and sex-stratified UKBBEUR-GWAS	40,826 (19,347/21,479)	CerebNet and SUIT+FS	30 volumes calculated by CerebNet and SUIT+FS	31 volumes calculated by CerebNet	FastGWA	9683756	317880	LDEUR (UKBBEUR, n = 40,826)	LDEUR-Male (UKBBEUR-Male, n = 19,347)	LDEUR-Female (UKBBEUR-Female, n = 21,479)	GRMUKBB
Sex-combined and sex-stratified ABCDEUR-GWAS	5,808 (3,039/2,769)	CerebNet and SUIT+FS	30 volumes calculated by CerebNet and SUIT+FS	31 volumes calculated by CerebNet	FastGWA	9064819	278985	LDABCD-EUR (ABCDEUR, n = 5,808)	LDABCD-Male (ABCDEUR-Male, n = 3,039)	LDABCD-Female (ABCDEUR-Female, n = 2,769)	GRMABCD-EUR
Sex-combined and sex-stratified CHIMGENEAS-GWAS	7,083 (2,504/4,579)	CerebNet and SUIT+FS	30 volumes calculated by CerebNet and SUIT+FS	31 volumes calculated by CerebNet	FastGWA	8790144	227164	LDEAS (CHIMGENEAS, n = 7,038)	LDEAS-Male (CHIMGENEAS-Male, n = 2,504)	LDEAS-Female (CHIMGENEAS-Female, n = 4,079)	GRMCHIMGEN
Sex-combined and sex-stratified ABCDAFR-GWAS	3,354 (1,723/1,631)	CerebNet and SUIT+FS	30 volumes calculated by CerebNet and SUIT+FS	31 volumes calculated by CerebNet	FastGWA	7162933	232441	LDAFR (ABCDAFR, n = 3,354)	LDAFR-Male (ABCDAFR-Male, n = 1,723)	LDAFR-Female (ABCDAFR-Female, n = 1,631)	GRMABCD-AFR
Sex-combined and sex-stratified EUR-GWAS	46,634 (22,386/24,248)	-	-	31 volumes calculated by CerebNet	METAL	9705909	319766	LDEUR (UKBBEUR, n = 40,826)	LDEUR-Male (UKBBEUR-Male, n = 19,347)	LDEUR-Female (UKBBEUR-Female, n = 21,479)	-
Sex-combined and sex-stratified EUR-EAS-GWAS	53,717 (24,890/28,827)	-	-	31 volumes calculated by CerebNet	METAL	6225475	169596	LDEUR-EAS (UKBBEUR + CHIMGENEAS, n = 47,864)	LDEUR-EAS-Male (UKBBEUR-Male + CHIMGENEAS-Male, n = 24,890)	LDEUR-EAS-Female (UKBBEUR-Female + CHIMGENEAS-Female, n = 28,827)	-
Sex-combined and sex-stratified EUR-EAS-AFR-GWAS	57,071 (26,613/30,458)	-	-	31 volumes calculated by CerebNet	METAL	5046855	157495	LDEUR-EAS-AFR (UKBBEUR + CHIMGENEAS + ABCDAFR, n = 51,218)	LDEUR-EAS-AFR-Male (UKBBEUR-Male + CHIMGENEAS-Male + ABCDAFR-Male, n = 26,613)	LDEUR-EAS-AFR-Female (UKBBEUR-Female + CHIMGENEAS-Female + ABCDAFR-Female, n = 30,458)	-
Abbereviations: ABCD, the Adolescent Brain Cognitive Development study; AFR, African ancestry; CHIMGEN, the Chinese Imaging Genetics study; EAS, East Asian ancestry; EUR, European ancestry; FS, FreeSurfer; GWAS, genome-wide association study; GRM, genetic relationship matrix; LD, linkage disequilibrium; SUIT, spatially unbiased infra-tentorial; UKBB, the UK Biobank study.

## Sheet: TableS4
Table S4. The SNP-based heritability (h2) estimates of 30 cerebellar substructure volumes obtained by two segmentation methods across four subgroups.
Cerebellar volumetric traits	UKBBEUR						ABCDEUR						CHIMGENEAS						ABCDAFR
	CerebNet			SUIT+FS			CerebNet			SUIT+FS			CerebNet			SUIT+FS			CerebNet			SUIT+FS
	h2	SE	P	h2	SE	P	h2	SE	P	h2	SE	P	h2	SE	P	h2	SE	P	h2	SE	P	h2	SE	P
Left-Cerebellum-White-Matter	0.659473	0.016269	0	0.517665	0.017007	1.70858e-203	0.945975	0.006795	0	0.717323	0.027045	5.21945e-155	0.446379	0.067064	2.81351e-11	0.305033	0.066542	4.56018e-06	0.849388	0.028365	5.12187e-197	0.895026	0.020798	0
Right-Cerebellum-White-Matter	0.640607	0.016355	0	0.478239	0.017158	5.72536e-171	0.918169	0.010005	0	0.755691	0.024932	8.44228e-202	0.50801	0.066987	3.35811e-14	0.279396	0.065762	2.15117e-05	0.879365	0.023829	4.11462e-298	0.873832	0.024535	7.99715e-278
Left-Cerebellum-Cortex	0.659263	0.016318	0	0.642775	0.016656	0	0.947464	0.006761	0	0.92689	0.008995	0	0.391106	0.066093	3.26852e-09	0.456493	0.067677	1.52846e-11	0.948431	0.011307	0	0.927145	0.015254	0
Right-Cerebellum-Cortex	0.656037	0.016328	0	0.634206	0.016701	0	0.942656	0.007269	0	0.90667	0.011454	0	0.509971	0.067078	2.90113e-14	0.444088	0.067759	5.60408e-11	0.942464	0.012456	0	0.839637	0.031692	1.14687e-154
Cbm_Vermis	0.467146	0.017082	1.16385e-164	0.453008	0.01723	2.37889e-152	0.916093	0.010513	0	0.64473	0.031512	4.91145e-93	0.365405	0.066962	4.84517e-08	0.244928	0.065868	0.000200435	0.934048	0.013587	0	0.621788	0.050628	1.13861e-34
Cbm_Left_I_IV	0.48008	0.017018	4.39267e-175	0.466322	0.017197	6.29604e-162	0.599786	0.033448	6.64757e-72	0.632617	0.030756	5.21382e-94	0.397596	0.066915	2.81898e-09	0.266017	0.06465	3.87641e-05	0.515965	0.053701	7.38944e-22	0.473988	0.053458	7.54475e-19
Cbm_Right_I_IV	0.48039	0.01696	1.70699e-176	0.456247	0.017126	2.29958e-156	0.622133	0.033371	1.44143e-77	0.62653	0.030818	6.97997e-92	0.324545	0.06716	1.34887e-06	0.26732	0.065251	4.18909e-05	0.577753	0.050821	6.00849e-30	0.593065	0.049877	1.3253e-32
Cbm_Left_V	0.480794	0.016949	5.15044e-177	0.48031	0.017128	4.94669e-173	0.607143	0.032808	1.84912e-76	0.623418	0.031409	1.13795e-87	0.325913	0.066145	8.33947e-07	0.300067	0.064879	3.74553e-06	0.534821	0.054842	1.8081e-22	0.617817	0.048057	7.96712e-38
Cbm_Right_V	0.648715	0.016342	0	0.464321	0.017208	2.34896e-160	0.626511	0.032726	1.0832e-81	0.621604	0.032084	1.27259e-83	0.327972	0.066804	9.13245e-07	0.350625	0.065024	6.95848e-08	0.607888	0.051319	2.27653e-32	0.623497	0.046951	3.03452e-40
Cbm_Left_VI	0.647727	0.01639	0	0.467263	0.017209	2.38203e-162	0.858955	0.016477	0	0.57328	0.034127	2.50592e-63	0.425067	0.068245	4.70789e-10	0.387034	0.065378	3.22054e-09	0.724988	0.046964	9.21504e-54	0.539763	0.053006	2.36033e-24
Cbm_Right_VI	0.673534	0.016286	0	0.540571	0.017141	2.72671e-218	0.87885	0.01474	0	0.521197	0.035956	1.29525e-47	0.314332	0.06695	2.66573e-06	0.343668	0.063974	7.78703e-08	0.616407	0.053705	1.70869e-30	0.375659	0.054167	4.05646e-12
Cbm_Left_CrusI	0.67375	0.016253	0	0.562604	0.017003	4.34776e-240	0.923365	0.009467	0	0.494247	0.038035	1.3141e-38	0.500676	0.06788	1.6324e-13	0.378073	0.066189	1.11642e-08	0.785502	0.040335	1.80851e-84	0.509095	0.05348	1.74261e-21
Cbm_Right_CrusI	0.596082	0.01673	4.89042e-278	0.520556	0.017129	7.37159e-203	0.901261	0.011875	0	0.436919	0.038587	1.01005e-29	0.51152	0.06748	3.44703e-14	0.317772	0.065309	1.1407e-06	0.827514	0.034426	1.1288e-127	0.385206	0.056487	9.14378e-12
Cbm_Left_CrusII	0.589098	0.016813	5.88889e-269	0.514423	0.017052	6.24832e-200	0.792914	0.022651	1.84291e-268	0.522185	0.036975	2.75434e-45	0.345702	0.066778	2.25622e-07	0.178794	0.064629	0.00566673	0.750398	0.041197	3.9335e-74	0.461727	0.055431	8.10055e-17
Cbm_Right_CrusII	0.483243	0.016982	4.08538e-178	0.435646	0.01718	7.38263e-142	0.839567	0.019271	0	0.521369	0.037616	1.10214e-43	0.294551	0.06547	6.82666e-06	0.197739	0.064643	0.00222122	0.777845	0.038418	3.78392e-91	0.458437	0.055865	2.28379e-16
Cbm_Left_VIIb	0.485568	0.016891	9.83377e-182	0.465593	0.017146	2.23353e-162	0.563128	0.035788	8.69101e-56	0.404729	0.038935	2.6131e-25	0.184529	0.064692	0.00433872	0.32382	0.066074	9.54138e-07	0.427328	0.058394	2.51671e-13	0.328846	0.057557	1.10743e-08
Cbm_Right_VIIb	0.45146	0.017084	6.90719e-154	0.378695	0.017252	8.51128e-107	0.642004	0.032497	7.15237e-87	0.376788	0.039762	2.64008e-21	0.313721	0.066288	2.21556e-06	0.346723	0.065765	1.34834e-07	0.505167	0.055807	1.40326e-19	0.275779	0.0564	1.0099e-06
Cbm_Left_VIIIa	0.447224	0.016924	6.99257e-154	0.374731	0.017218	5.10083e-105	0.630826	0.033922	3.43827e-77	0.350968	0.041407	2.32959e-17	0.341234	0.065756	2.10976e-07	0.269337	0.065134	3.54767e-05	0.507965	0.056055	1.28194e-19	0.264477	0.056098	2.42242e-06
Cbm_Right_VIIIa	0.434355	0.01708	1.15669e-142	0.397743	0.017312	8.29229e-117	0.556211	0.036967	3.65923e-51	0.397518	0.039601	1.03673e-23	0.344972	0.066593	2.21524e-07	0.3336	0.066211	4.69347e-07	0.474685	0.055278	8.90898e-18	0.295433	0.055957	1.29436e-07
Cbm_Left_VIIIb	0.430581	0.01702	3.31536e-141	0.367668	0.017158	7.26778e-102	0.47558	0.037272	2.75215e-37	0.364877	0.040409	1.72305e-19	0.244888	0.064018	0.000130613	0.281456	0.066812	2.52385e-05	0.359643	0.058879	1.00779e-09	0.241714	0.057119	2.31868e-05
Cbm_Right_VIIIb	0.692433	0.016268	0	0.482636	0.017244	2.23438e-172	0.523392	0.036801	6.67007e-46	0.470545	0.038116	5.17839e-35	0.228135	0.065036	0.000451784	0.265651	0.065567	5.08694e-05	0.321827	0.057234	1.87665e-08	0.274474	0.056608	1.24287e-06
Cbm_Left_IX	0.678496	0.016328	0	0.476003	0.017149	1.43863e-169	0.898052	0.012527	0	0.568575	0.034109	2.18948e-62	0.512723	0.06817	5.42587e-14	0.418759	0.067434	5.30153e-10	0.886611	0.022109	0	0.523828	0.053579	1.417e-22
Cbm_Right_IX	0.468458	0.016999	3.55143e-167	0.408813	0.017324	4.03385e-123	0.847881	0.018116	0	0.52867	0.036968	2.16475e-46	0.434273	0.06807	1.77319e-10	0.392006	0.066878	4.5868e-09	0.800197	0.035191	1.85718e-114	0.479642	0.055341	4.43546e-18
Cbm_Left_X	0.514298	0.01693	1.07565e-202	0.394195	0.017337	1.92059e-114	0.738941	0.027722	1.54947e-156	0.503511	0.036676	6.8421e-43	0.346907	0.066929	2.181e-07	0.223451	0.065001	0.000586775	0.652502	0.050989	1.7059e-37	0.496672	0.054488	7.84859e-20
Cbm_Right_X	0.587405	0.016657	2.03856e-272	0.478313	0.017275	9.69514e-169	0.756613	0.026238	7.47504e-183	0.476781	0.038527	3.55814e-35	0.312292	0.067394	3.58971e-06	0.221885	0.065413	0.000693686	0.801771	0.035031	6.19302e-116	0.537834	0.051809	3.02297e-25
Cbm_Vermis_VI	0.500154	0.016895	1.34028e-192	0.457352	0.017249	6.56148e-155	0.71615	0.028208	3.40561e-142	0.575654	0.034785	1.63015e-61	0.337465	0.065787	2.90265e-07	0.246537	0.065498	0.000167191	0.833367	0.031408	3.97239e-155	0.556182	0.053448	2.32702e-25
Cbm_Vermis_VII	0.643686	0.016347	0	0.475185	0.01714	3.61274e-169	0.771617	0.024738	1.38641e-213	0.50173	0.036904	4.25578e-42	0.406537	0.068252	2.57837e-09	0.267495	0.066203	5.33313e-05	0.710182	0.045456	5.03603e-55	0.539229	0.054742	6.82915e-23
Cbm_Vermis_VIII	0.588584	0.016633	2.75239e-274	0.459408	0.017219	7.9699e-157	0.910669	0.01125	0	0.542615	0.035681	3.15872e-52	0.26295	0.064879	5.05803e-05	0.244871	0.065972	0.000205838	0.820494	0.032238	6.8565e-143	0.425532	0.05596	2.86633e-14
Cbm_Vermis_IX	0.44655	0.017121	5.83446e-150	0.412714	0.017357	5.64746e-125	0.894316	0.013194	0	0.543407	0.03527	1.46738e-53	0.387836	0.067394	8.67672e-09	0.319281	0.067177	2.00587e-06	0.775504	0.038726	3.30783e-89	0.386915	0.057509	1.72125e-11
Cbm_Vermis_X	0.676813	0.016134	0	0.492019	0.01708	1.76641e-182	0.581139	0.035028	8.1368e-62	0.598101	0.032857	4.8721e-74	0.321954	0.06724	1.68341e-06	0.163058	0.065098	0.0122518	0.558794	0.054283	7.49259e-25	0.495221	0.048737	2.95754e-24
Abbereviations: ABCD, the Adolescent Brain Cognitive Development study; AFR, African ancestry; CHIMGEN, the Chinese Imaging Genetics study; EAS, East Asian ancestry; EUR, European ancestry; FS, FreeSurfer; SUIT, spatially unbiased infra-tentorial; UKBB, the UK Biobank study.

## Sheet: TableS5
Table S5. The significant variant-trait associations (P < 5 × 10-8) of 30 cerebellar substructure volumes obtained by two methods in UK Bionbank dataset.
Cerebellar volumetric traits	Lead variants	CHR	POS	A1	A2	AF	CerebNet				SUIT+FS
							BETA	SE	P	Power	BETA	SE	P	Power
Left-Cerebellum-White-Matter	rs6657847	1	6927523	T	C	0.3579	0.0321	0.0054	3.88e-09	0.146142	-	-	-	-
Left-Cerebellum-White-Matter	rs4400633	1	7054979	T	C	0.4872	-0.0337	0.0052	1.18e-10	0.262171	-	-	-	-
Left-Cerebellum-White-Matter	rs228701	1	7889804	C	G	0.3414	-0.0315	0.0055	1.18e-08	0.118556	-	-	-	-
Left-Cerebellum-White-Matter	rs839996	1	43816532	T	C	0.6144	-	-	-	-	0.036	0.006	2.46e-09	0.328888
Left-Cerebellum-White-Matter	rs116580787	1	51654503	A	G	0.052	0.0668	0.0117	1.24e-08	0.112693	-	-	-	-
Left-Cerebellum-White-Matter	rs2779490	1	76014288	T	C	0.1509	-0.047	0.0073	1.32e-10	0.260241	-	-	-	-
Left-Cerebellum-White-Matter	rs12117885	1	183494214	A	G	0.6296	-	-	-	-	-0.0405	0.0061	2.86e-11	0.555215
Left-Cerebellum-White-Matter	rs12122217	1	183545665	T	C	0.3297	0.034	0.0055	8.51e-10	0.188652	-	-	-	-
Left-Cerebellum-White-Matter	rs7523102	1	243672074	T	C	0.2661	0.0337	0.006	1.61e-08	0.116077	-	-	-	-
Left-Cerebellum-White-Matter	rs517246	1	244448513	A	C	0.0904	-0.0564	0.0096	3.75e-09	0.203632	-0.0606	0.0108	1.9e-08	0.314972
Left-Cerebellum-White-Matter	rs55795022	2	16386265	A	T	0.171	-0.0524	0.0079	3.09e-11	0.57473	-0.0639	0.0089	6.17e-13	0.923965
Left-Cerebellum-White-Matter	rs13388394	2	33764176	A	G	0.9583	-0.1005	0.0131	1.49e-14	0.614762	-0.1176	0.0147	1.51e-15	0.897946
Left-Cerebellum-White-Matter	rs4670699	2	33779906	T	C	0.6763	-	-	-	-	-0.0364	0.0063	8.08e-09	0.279583
Left-Cerebellum-White-Matter	rs7593335	2	88878133	A	G	0.2871	0.0383	0.0058	3.17e-11	0.309033	-	-	-	-
Left-Cerebellum-White-Matter	rs2234675	2	223085955	T	G	0.0423	-0.0935	0.0129	5.03e-13	0.471336	-0.0864	0.0146	3.39e-09	0.311391
Left-Cerebellum-White-Matter	rs11130182	3	49206767	T	C	0.6691	0.0312	0.0056	1.8e-08	0.104666	-	-	-	-
Left-Cerebellum-White-Matter	rs3774800	3	49334768	A	G	0.6421	-	-	-	-	0.0338	0.0061	3.47e-08	0.206167
Left-Cerebellum-White-Matter	rs78094954	3	69881136	A	G	0.2137	0.0415	0.0064	9.25e-11	0.277972	0.0448	0.0072	5.5e-10	0.419968
Left-Cerebellum-White-Matter	rs2369291	4	4750362	T	C	0.4868	0.0325	0.0053	6.7e-10	0.20946	-	-	-	-
Left-Cerebellum-White-Matter	rs4689933	4	4761140	T	C	0.6801	-	-	-	-	0.0366	0.0064	8.26e-09	0.283761
Left-Cerebellum-White-Matter	rs2199936	4	89045331	A	G	0.1145	-0.0485	0.0082	2.82e-09	0.14978	-	-	-	-
Left-Cerebellum-White-Matter	rs72764483	5	64962816	A	G	0.7458	-0.033	0.006	3.93e-08	0.0893649	-0.0388	0.0068	1.05e-08	0.266387
Left-Cerebellum-White-Matter	rs190568980	5	68764245	T	C	0.0055	-0.2815	0.0478	4e-09	0.242104	-	-	-	-
Left-Cerebellum-White-Matter	rs2251913	5	112135737	A	G	0.5072	-0.0323	0.0052	7.12e-10	0.201647	-	-	-	-
Left-Cerebellum-White-Matter	rs544243	5	112167130	T	G	0.4456	-	-	-	-	-0.033	0.0059	2.53e-08	0.222643
Left-Cerebellum-White-Matter	rs72829213	6	7864764	T	C	0.0902	0.0599	0.0091	6.05e-11	0.292331	0.0564	0.0103	4.34e-08	0.203632
Left-Cerebellum-White-Matter	rs76054911	6	27285365	T	C	0.069	0.0595	0.0103	6.67e-09	0.126914	-	-	-	-
Left-Cerebellum-White-Matter	rs2153960	6	108988184	A	G	0.7075	0.0521	0.0057	6.21e-20	0.907409	0.0533	0.0064	1.02e-16	0.930634
Left-Cerebellum-White-Matter	rs9356511	6	158650236	A	G	0.1436	-	-	-	-	-0.0533	0.0085	3e-10	0.457454
Left-Cerebellum-White-Matter	rs12193486	6	158650678	C	G	0.1437	-0.0457	0.0075	1.19e-09	0.192332	-	-	-	-
Left-Cerebellum-White-Matter	rs7808836	7	23474325	T	C	0.3796	-0.036	0.0054	2.28e-11	0.323596	-	-	-	-
Left-Cerebellum-White-Matter	rs10950943	7	23490230	T	G	0.5851	-	-	-	-	0.0339	0.006	1.86e-08	0.248975
Left-Cerebellum-White-Matter	rs12536500	7	50808033	T	C	0.2495	-0.046	0.006	2.35e-14	0.594387	-0.0485	0.0068	9.72e-13	0.708552
Left-Cerebellum-White-Matter	rs3801382	7	120998277	T	G	0.7181	0.0471	0.0058	5.48e-16	0.728019	-	-	-	-
Left-Cerebellum-White-Matter	rs6994577	8	24743002	A	G	0.7521	-0.0502	0.0061	1.43e-16	0.772011	-	-	-	-
Left-Cerebellum-White-Matter	rs2925775	8	24764613	A	C	0.6601	-	-	-	-	-0.0378	0.0062	1.44e-09	0.369426
Left-Cerebellum-White-Matter	rs55796651	8	25349240	T	C	0.2574	-0.0366	0.006	1.02e-09	0.190048	-	-	-	-
Left-Cerebellum-White-Matter	rs2956039	8	75079185	A	G	0.762	-0.0354	0.0061	8.04e-09	0.126611	-	-	-	-
Left-Cerebellum-White-Matter	rs2936682	8	75089724	C	G	0.7685	-	-	-	-	-0.0463	0.007	3.74e-11	0.551514
Left-Cerebellum-White-Matter	rs410663	8	90871689	A	T	0.6491	0.031	0.0055	1.78e-08	0.110703	-	-	-	-
Left-Cerebellum-White-Matter	rs7820543	8	121046348	A	C	0.6104	-0.0306	0.0053	1.02e-08	0.117748	-	-	-	-
Left-Cerebellum-White-Matter	rs1931425	9	11158480	C	G	0.5828	-0.0319	0.0053	2.21e-09	0.169677	-	-	-	-
Left-Cerebellum-White-Matter	rs10733282	9	14458638	T	C	0.2755	-	-	-	-	-0.0375	0.0066	1.29e-08	0.253441
Left-Cerebellum-White-Matter	rs416459	9	14462868	A	T	0.2855	-0.0355	0.0058	7.93e-10	0.192548	-	-	-	-
Left-Cerebellum-White-Matter	rs7038017	9	94696852	T	C	0.384	-	-	-	-	0.0359	0.0061	4.08e-09	0.322734
Left-Cerebellum-White-Matter	rs118017926	9	109626812	T	C	0.9742	0.0932	0.0165	1.57e-08	0.109678	-	-	-	-
Left-Cerebellum-White-Matter	rs10759832	9	118930313	T	C	0.6118	-	-	-	-	-0.0504	0.006	7.8e-17	0.942077
Left-Cerebellum-White-Matter	rs985223	9	118935817	A	G	0.6095	-0.0599	0.0054	8.96e-29	0.998171	-	-	-	-
Left-Cerebellum-White-Matter	rs62574179	9	118970563	A	G	0.9426	-0.067	0.0113	3.03e-09	0.159389	-	-	-	-
Left-Cerebellum-White-Matter	rs10114003	9	119040070	C	G	0.1622	-0.0413	0.0072	9.97e-09	0.135687	-	-	-	-
Left-Cerebellum-White-Matter	rs35565319	9	119065043	T	C	0.0706	0.1231	0.0102	1.25e-33	0.99982	0.0996	0.0115	4.51e-18	0.966687
Left-Cerebellum-White-Matter	rs2416563	9	119354783	A	G	0.4621	0.0392	0.0052	6.78e-14	0.553842	-	-	-	-
Left-Cerebellum-White-Matter	rs10441738	9	119364610	T	C	0.5382	-	-	-	-	-0.0387	0.0059	5.18e-11	0.525371
Left-Cerebellum-White-Matter	rs4752582	10	123443605	A	G	0.9247	-0.0578	0.0099	5.78e-09	0.1374	-	-	-	-
Left-Cerebellum-White-Matter	rs6484290	11	10470852	A	G	0.5338	0.0342	0.0053	8.42e-11	0.282722	0.0361	0.0059	1.15e-09	0.380711
Left-Cerebellum-White-Matter	rs12788188	11	69003581	A	T	0.5034	0.0293	0.0053	3.03e-08	0.103061	-	-	-	-
Left-Cerebellum-White-Matter	rs10876041	12	50901882	T	C	0.3612	-0.0317	0.0054	4.93e-09	0.13584	-	-	-	-
Left-Cerebellum-White-Matter	rs11170517	12	53753909	T	C	0.1354	-	-	-	-	0.0474	0.0086	3.49e-08	0.206055
Left-Cerebellum-White-Matter	rs10778142	12	102093698	A	C	0.7458	-0.0379	0.0061	7.28e-10	0.231294	-	-	-	-
Left-Cerebellum-White-Matter	rs61936576	12	102302980	A	G	0.884	-0.049	0.0082	2.16e-09	0.166891	-0.0567	0.0092	8.36e-10	0.396165
Left-Cerebellum-White-Matter	rs4303283	12	102321792	A	C	0.797	-	-	-	-	-0.0402	0.0073	4.25e-08	0.202415
Left-Cerebellum-White-Matter	rs11111090	12	102326461	A	C	0.5206	0.0852	0.0052	1.59e-59	1	0.0928	0.0059	8.86e-56	1
Left-Cerebellum-White-Matter	rs76666326	12	102331923	T	G	0.0833	0.0652	0.0095	6.31e-12	0.381593	0.0638	0.0107	2.44e-09	0.341196
Left-Cerebellum-White-Matter	rs4313630	12	102335984	C	G	0.0518	-	-	-	-	-0.0752	0.0135	2.32e-08	0.245823
Left-Cerebellum-White-Matter	rs7971939	12	102407432	A	T	0.7801	-	-	-	-	-0.0869	0.0071	2.21e-34	0.999999
Left-Cerebellum-White-Matter	rs4611262	12	102502759	T	C	0.2193	-0.0417	0.0064	5.91e-11	0.301721	-0.04	0.0072	2.4e-08	0.23533
Left-Cerebellum-White-Matter	rs187441419	12	102532378	C	G	0.0072	-0.2223	0.0309	6.32e-13	0.468577	-0.2412	0.0349	4.76e-12	0.647391
Left-Cerebellum-White-Matter	rs1533688	12	102772745	T	C	0.2247	0.0438	0.0063	2.67e-12	0.410727	-	-	-	-
Left-Cerebellum-White-Matter	rs7484309	12	102779478	T	C	0.2904	-	-	-	-	0.038	0.0065	4.68e-09	0.30164
Left-Cerebellum-White-Matter	rs11111278	12	102846020	A	G	0.7921	-0.0875	0.0065	7.97e-42	0.999999	-	-	-	-
Left-Cerebellum-White-Matter	rs79519967	12	102850462	T	G	0.9911	0.1653	0.0279	2.94e-09	0.155279	-	-	-	-
Left-Cerebellum-White-Matter	rs11111293	12	102921296	T	C	0.7772	-	-	-	-	-0.0796	0.0071	1.59e-29	0.999971
Left-Cerebellum-White-Matter	rs35749	12	102940183	T	C	0.138	-	-	-	-	-0.0574	0.0086	2.36e-11	0.581014
Left-Cerebellum-White-Matter	rs703547	12	102943707	C	G	0.8419	0.0497	0.0072	6.22e-12	0.394219	-	-	-	-
Left-Cerebellum-White-Matter	rs7135687	12	102962922	T	G	0.4667	0.0393	0.0064	6.91e-10	0.560931	0.0404	0.0072	1.89e-08	0.62199
Left-Cerebellum-White-Matter	rs2100636	12	102990973	A	G	0.2729	-0.0331	0.0059	2.28e-08	0.108004	-	-	-	-
Left-Cerebellum-White-Matter	rs11068772	12	118441838	T	C	0.3792	-0.0303	0.0054	1.79e-08	0.10573	-	-	-	-
Left-Cerebellum-White-Matter	rs9556966	13	99169427	A	C	0.5608	0.0289	0.0053	4.81e-08	0.0881801	-	-	-	-
Left-Cerebellum-White-Matter	rs12050306	14	50981217	A	G	0.0547	0.0645	0.0115	1.98e-08	0.103948	-	-	-	-
Left-Cerebellum-White-Matter	rs762643	14	54422767	T	G	0.4493	0.0296	0.0052	1.59e-08	0.106911	-	-	-	-
Left-Cerebellum-White-Matter	rs1011173	15	78498947	A	G	0.1014	0.0583	0.0087	2.32e-11	0.336852	-	-	-	-
Left-Cerebellum-White-Matter	rs1011172	15	78501803	A	G	0.345	-0.0315	0.0056	1.55e-08	0.120693	-	-	-	-
Left-Cerebellum-White-Matter	rs12050695	15	78561627	T	C	0.3863	-0.0318	0.0054	3.24e-09	0.152473	-	-	-	-
Left-Cerebellum-White-Matter	rs12599637	16	69593355	T	C	0.5973	0.0298	0.0055	4.8e-08	0.101302	-	-	-	-
Left-Cerebellum-White-Matter	rs2949997	17	43687072	A	G	0.2088	-	-	-	-	-0.0502	0.0074	9.67e-12	0.64743
Left-Cerebellum-White-Matter	rs112972619	17	43776425	T	C	0.2169	-0.054	0.0063	1.6e-17	0.818914	-	-	-	-
Left-Cerebellum-White-Matter	rs2458213	17	44344219	T	C	0.19	-	-	-	-	-0.0565	0.0078	4.21e-13	0.811343
Left-Cerebellum-White-Matter	rs62073257	17	44412076	A	G	0.7948	0.0585	0.0066	9.91e-19	0.903761	-	-	-	-
Left-Cerebellum-White-Matter	rs199501	17	44862613	A	G	0.2341	-	-	-	-	-0.0457	0.0069	4.68e-11	0.531334
Left-Cerebellum-White-Matter	rs9948347	18	35270126	T	C	0.709	-0.0356	0.0058	7.04e-10	0.203424	-	-	-	-
Left-Cerebellum-White-Matter	rs1942029	18	35419197	T	C	0.4388	0.0292	0.0053	3.78e-08	0.095117	-	-	-	-
Left-Cerebellum-White-Matter	rs116957498	18	37983470	T	C	0.019	-	-	-	-	0.1229	0.0215	1.11e-08	0.256097
Left-Cerebellum-White-Matter	rs73429770	18	38007071	A	G	0.1763	0.056	0.0068	2.8e-16	0.741958	0.057	0.0077	1.37e-13	0.775905
Left-Cerebellum-White-Matter	rs73448369	18	38470218	T	C	0.3453	-	-	-	-	0.0354	0.0062	1.07e-08	0.261284
Left-Cerebellum-White-Matter	rs470546	18	74696425	A	G	0.1545	0.059	0.0072	3.23e-16	0.740477	0.0566	0.0081	3.64e-12	0.654179
Left-Cerebellum-White-Matter	rs11084828	19	36213461	T	C	0.1386	-0.0435	0.0076	9e-09	0.123963	-	-	-	-
Left-Cerebellum-White-Matter	rs66500423	19	41195170	T	C	0.6878	-	-	-	-	0.0358	0.0064	2.03e-08	0.2391
Left-Cerebellum-White-Matter	rs6088801	20	33942261	A	G	0.6303	-	-	-	-	-0.039	0.0061	1.53e-10	0.472517
Left-Cerebellum-White-Matter	rs1886693	20	33986566	C	G	0.5959	-0.0346	0.0056	5.84e-10	0.274837	-	-	-	-
Left-Cerebellum-White-Matter	rs112727835	20	34539459	A	G	0.943	-0.0642	0.0114	1.59e-08	0.115613	-	-	-	-
Left-Cerebellum-White-Matter	rs6512651	20	49119988	C	G	0.6376	-	-	-	-	0.0348	0.0062	1.53e-08	0.251357
Left-Cerebellum-White-Matter	rs5756894	22	38450136	A	C	0.6054	-	-	-	-	-0.0349	0.006	6.99e-09	0.282359
Left-Cerebellum-White-Matter	rs28368435	22	46406695	A	G	0.3815	0.0347	0.0054	1.05e-10	0.263217	0.041	0.0061	1.23e-11	0.595235
Left-Cerebellum-White-Matter	rs56031937	X	12529776	A	G	0.8265	0.0325	0.0057	8.5e-09	0.0265531	-	-	-	-
Right-Cerebellum-White-Matter	rs6657847	1	6927523	T	C	0.3579	0.0298	0.0054	4.37e-08	0.0855944	-	-	-	-
Right-Cerebellum-White-Matter	rs4400633	1	7054979	T	C	0.4872	-0.0358	0.0052	7.7e-12	0.368263	-	-	-	-
Right-Cerebellum-White-Matter	rs72630578	1	7739766	A	C	0.7947	0.0365	0.0065	1.73e-08	0.107936	-	-	-	-
Right-Cerebellum-White-Matter	rs11587504	1	43841744	T	C	0.6158	-	-	-	-	0.0349	0.0062	1.69e-08	0.274527
Right-Cerebellum-White-Matter	rs116580787	1	51654503	A	G	0.052	0.0665	0.0117	1.4e-08	0.109091	-	-	-	-
Right-Cerebellum-White-Matter	rs187001747	1	51694602	T	G	0.0489	-	-	-	-	0.0816	0.0139	4.76e-09	0.335015
Right-Cerebellum-White-Matter	rs2779490	1	76014288	T	C	0.1509	-0.0473	0.0073	1.04e-10	0.270304	-	-	-	-
Right-Cerebellum-White-Matter	rs6669960	1	183436577	C	G	0.371	-	-	-	-	0.0391	0.0062	3.52e-10	0.478972
Right-Cerebellum-White-Matter	rs12122217	1	183545665	T	C	0.3297	0.0337	0.0055	1.09e-09	0.17795	-	-	-	-
Right-Cerebellum-White-Matter	rs7523102	1	243672074	T	C	0.2661	0.0362	0.006	1.34e-09	0.189724	0.038	0.0069	3.3e-08	0.257941
Right-Cerebellum-White-Matter	rs144137208	2	16265986	T	C	0.2413	-0.0397	0.0071	2.59e-08	0.275573	-	-	-	-
Right-Cerebellum-White-Matter	rs55795022	2	16386265	A	T	0.171	-0.0568	0.0079	5.82e-13	0.746147	-0.071	0.0091	5.44e-15	0.98603
Right-Cerebellum-White-Matter	rs13388394	2	33764176	A	G	0.9583	-0.0969	0.0131	1.23e-13	0.534217	-0.1236	0.0151	2.42e-16	0.945769
Right-Cerebellum-White-Matter	rs7593335	2	88878133	A	G	0.2871	0.037	0.0058	1.37e-10	0.252451	-	-	-	-
Right-Cerebellum-White-Matter	rs2234675	2	223085955	T	G	0.0423	-0.0976	0.0129	4.57e-14	0.565196	-0.084	0.0149	1.89e-08	0.264428
Right-Cerebellum-White-Matter	rs7640903	3	49338465	A	G	0.568	-	-	-	-	0.0331	0.0061	4.71e-08	0.222139
Right-Cerebellum-White-Matter	rs9311676	3	58470351	T	C	0.4122	0.0298	0.0053	2.03e-08	0.10403	-	-	-	-
Right-Cerebellum-White-Matter	rs78094954	3	69881136	A	G	0.2137	0.0401	0.0064	3.68e-10	0.225724	0.0425	0.0074	7.94e-09	0.318592
Right-Cerebellum-White-Matter	rs2369291	4	4750362	T	C	0.4868	0.0332	0.0053	2.86e-10	0.239399	-	-	-	-
Right-Cerebellum-White-Matter	rs4689933	4	4761140	T	C	0.6801	-	-	-	-	0.0383	0.0065	3.63e-09	0.365079
Right-Cerebellum-White-Matter	rs2199936	4	89045331	A	G	0.1145	-0.0446	0.0082	4.63e-08	0.0818914	-	-	-	-
Right-Cerebellum-White-Matter	rs16894165	5	64944734	A	C	0.7457	-	-	-	-	-0.0457	0.0069	4.2e-11	0.593321
Right-Cerebellum-White-Matter	rs11750825	5	64952500	T	C	0.2542	0.0345	0.006	9.74e-09	0.123447	-	-	-	-
Right-Cerebellum-White-Matter	rs190568980	5	68764245	T	C	0.0055	-0.2799	0.0478	4.82e-09	0.233744	-	-	-	-
Right-Cerebellum-White-Matter	rs2251913	5	112135737	A	G	0.5072	-0.0317	0.0052	1.45e-09	0.178386	-	-	-	-
Right-Cerebellum-White-Matter	rs72829213	6	7864764	T	C	0.0902	0.0558	0.0091	1.02e-09	0.188758	0.0577	0.0105	4.11e-08	0.235113
Right-Cerebellum-White-Matter	rs76054911	6	27285365	T	C	0.069	0.0641	0.0103	4.24e-10	0.209631	-	-	-	-
Right-Cerebellum-White-Matter	rs3130176	6	33017457	A	G	0.4219	-	-	-	-	0.0332	0.0061	4.12e-08	0.222268
Right-Cerebellum-White-Matter	rs2153960	6	108988184	A	G	0.7075	-	-	-	-	0.046	0.0066	2.54e-12	0.702029
Right-Cerebellum-White-Matter	rs4946935	6	109000742	A	G	0.2871	-0.0511	0.0058	8.96e-19	0.876603	-	-	-	-
Right-Cerebellum-White-Matter	rs4710078	6	158649353	A	G	0.1439	-	-	-	-	-0.0502	0.0086	6.02e-09	0.33908
Right-Cerebellum-White-Matter	rs12193486	6	158650678	C	G	0.1437	-0.0449	0.0075	2.14e-09	0.171161	-	-	-	-
Right-Cerebellum-White-Matter	rs7808836	7	23474325	T	C	0.3796	-0.0356	0.0054	3.76e-11	0.303911	-	-	-	-
Right-Cerebellum-White-Matter	rs4445126	7	23497095	A	T	0.3931	-	-	-	-	-0.0338	0.0062	4.79e-08	0.231854
Right-Cerebellum-White-Matter	rs12536500	7	50808033	T	C	0.2495	-0.047	0.006	6.54e-15	0.641565	-0.045	0.0069	9.09e-11	0.546092
Right-Cerebellum-White-Matter	rs3801382	7	120998277	T	G	0.7181	0.0487	0.0058	5.72e-17	0.79184	-	-	-	-
Right-Cerebellum-White-Matter	rs2874306	8	24746311	A	G	0.7357	-0.0372	0.0059	3.91e-10	0.222815	-	-	-	-
Right-Cerebellum-White-Matter	rs13251285	8	24779437	T	G	0.6796	-	-	-	-	-0.0407	0.0066	5.22e-10	0.490681
Right-Cerebellum-White-Matter	rs2976443	8	24806842	C	G	0.7664	-0.0501	0.0062	5.97e-16	0.728672	-	-	-	-
Right-Cerebellum-White-Matter	rs55796651	8	25349240	T	C	0.2574	-0.0332	0.006	3.02e-08	0.0963257	-	-	-	-
Right-Cerebellum-White-Matter	rs2173579	8	75088047	C	G	0.7683	-0.0345	0.0062	2.68e-08	0.0983473	-	-	-	-
Right-Cerebellum-White-Matter	rs7820543	8	121046348	A	C	0.6104	-0.0293	0.0053	3.97e-08	0.0857209	-	-	-	-
Right-Cerebellum-White-Matter	rs1931425	9	11158480	C	G	0.5828	-0.0314	0.0053	3.88e-09	0.152459	-	-	-	-
Right-Cerebellum-White-Matter	rs913413	9	14464863	C	G	0.7142	0.0323	0.0058	2.04e-08	0.100183	-	-	-	-
Right-Cerebellum-White-Matter	rs10966042	9	23718477	A	C	0.1545	-0.0414	0.0072	9.26e-09	0.120062	-	-	-	-
Right-Cerebellum-White-Matter	rs7037255	9	94696954	A	G	0.384	-	-	-	-	0.0347	0.0062	2.69e-08	0.265329
Right-Cerebellum-White-Matter	rs10759832	9	118930313	T	C	0.6117	-	-	-	-	-0.0547	0.0062	8.52e-19	0.985092
Right-Cerebellum-White-Matter	rs1160248	9	118944239	T	C	0.6121	-0.0584	0.0054	1.85e-27	0.996392	-	-	-	-
Right-Cerebellum-White-Matter	rs72754248	9	119061396	A	G	0.0706	-	-	-	-	0.0881	0.0118	6.44e-14	0.839421
Right-Cerebellum-White-Matter	rs35565319	9	119065043	T	C	0.0706	0.12	0.0102	4.56e-32	0.999582	-	-	-	-
Right-Cerebellum-White-Matter	rs7849245	9	119351562	T	G	0.5366	-	-	-	-	-0.0356	0.006	3.73e-09	0.353017
Right-Cerebellum-White-Matter	rs2416563	9	119354783	A	G	0.4621	0.0403	0.0052	1.18e-14	0.614959	-	-	-	-
Right-Cerebellum-White-Matter	rs803893	9	119407508	A	G	0.0844	-0.0513	0.0094	4.51e-08	0.0844872	-	-	-	-
Right-Cerebellum-White-Matter	rs4752582	10	123443605	A	G	0.9247	-0.0631	0.0099	1.96e-10	0.244424	-	-	-	-
Right-Cerebellum-White-Matter	rs11605232	11	10468501	T	C	0.5321	0.0353	0.0053	2.34e-11	0.33845	-	-	-	-
Right-Cerebellum-White-Matter	rs7929999	11	10470440	C	G	0.4685	-	-	-	-	-0.0338	0.0061	2.63e-08	0.26424
Right-Cerebellum-White-Matter	rs12788188	11	69003581	A	T	0.5035	0.0294	0.0053	2.57e-08	0.105648	-	-	-	-
Right-Cerebellum-White-Matter	rs7310976	12	4100116	T	C	0.3373	0.032	0.0058	3.46e-08	0.129835	-	-	-	-
Right-Cerebellum-White-Matter	rs10876041	12	50901882	T	C	0.3612	-0.0334	0.0054	6.53e-10	0.19333	-	-	-	-
Right-Cerebellum-White-Matter	rs9308313	12	102084005	A	G	0.6357	-	-	-	-	-0.0351	0.0063	1.97e-08	0.266085
Right-Cerebellum-White-Matter	rs10778142	12	102093698	A	C	0.7458	-0.0406	0.0061	3.77e-11	0.345179	-	-	-	-
Right-Cerebellum-White-Matter	rs61936575	12	102301915	T	C	0.8928	-0.0562	0.0085	3.84e-11	0.315022	-	-	-	-
Right-Cerebellum-White-Matter	rs58578551	12	102303950	A	G	0.1181	-	-	-	-	0.0598	0.0094	1.87e-10	0.52527
Right-Cerebellum-White-Matter	rs11111090	12	102326461	A	C	0.5206	0.087	0.0052	5.14e-62	1	0.095	0.006	6.93e-56	1
Right-Cerebellum-White-Matter	rs76666326	12	102331923	T	G	0.0833	0.0609	0.0095	1.35e-10	0.260714	-	-	-	-
Right-Cerebellum-White-Matter	rs4313630	12	102335984	C	G	0.0518	-	-	-	-	-0.0784	0.0138	1.22e-08	0.313885
Right-Cerebellum-White-Matter	rs76197610	12	102338012	T	C	0.918	-	-	-	-	-0.0717	0.011	8.05e-11	0.57077
Right-Cerebellum-White-Matter	rs144782470	12	102524505	T	C	0.0392	-0.0925	0.0135	6.37e-12	0.374468	-	-	-	-
Right-Cerebellum-White-Matter	rs78360407	12	102751205	A	C	0.0448	-	-	-	-	-0.0911	0.0145	3.58e-10	0.47662
Right-Cerebellum-White-Matter	rs1533688	12	102772745	T	C	0.2247	0.0429	0.0063	7.08e-12	0.369522	0.0405	0.0072	1.92e-08	0.268257
Right-Cerebellum-White-Matter	rs11111278	12	102846020	A	G	0.7921	-0.0866	0.0065	5.28e-41	0.999998	-0.0908	0.0074	2.91e-34	1
Right-Cerebellum-White-Matter	rs35749	12	102940183	T	C	0.138	-	-	-	-	-0.0617	0.0088	2.05e-12	0.735179
Right-Cerebellum-White-Matter	rs703547	12	102943707	C	G	0.8419	0.0484	0.0072	2.06e-11	0.343108	-	-	-	-
Right-Cerebellum-White-Matter	rs7135687	12	102962922	T	G	0.4667	0.0384	0.0064	1.68e-09	0.509926	0.0439	0.0073	2.31e-09	0.791132
Right-Cerebellum-White-Matter	rs2100636	12	102990973	A	G	0.2729	-0.0339	0.0059	1.06e-08	0.128122	-	-	-	-
Right-Cerebellum-White-Matter	rs11068772	12	118441838	T	C	0.3792	-0.0328	0.0054	1.04e-09	0.183339	-	-	-	-
Right-Cerebellum-White-Matter	rs9556966	13	99169427	A	C	0.5608	0.0301	0.0053	1.36e-08	0.11865	-	-	-	-
Right-Cerebellum-White-Matter	rs139763750	14	51049397	A	G	0.0537	0.0645	0.0116	2.6e-08	0.0975422	-	-	-	-
Right-Cerebellum-White-Matter	rs1011173	15	78498947	A	G	0.1014	0.0589	0.0087	1.42e-11	0.355964	-	-	-	-
Right-Cerebellum-White-Matter	rs11638511	15	78551927	A	G	0.4381	0.0309	0.0053	4.5e-09	0.142437	-	-	-	-
Right-Cerebellum-White-Matter	rs12716869	16	79167309	T	G	0.7087	-0.0322	0.0058	2.14e-08	0.102079	-	-	-	-
Right-Cerebellum-White-Matter	rs112972619	17	43776425	T	C	0.2169	-0.0545	0.0063	7.99e-18	0.834028	-	-	-	-
Right-Cerebellum-White-Matter	rs17688916	17	43778680	A	T	0.1926	-	-	-	-	-0.0469	0.0078	1.97e-09	0.433355
Right-Cerebellum-White-Matter	rs2668657	17	44282892	T	C	0.776	0.0535	0.0063	1.74e-17	0.822665	-	-	-	-
Right-Cerebellum-White-Matter	rs113656289	17	44363632	A	C	0.829	-	-	-	-	0.0577	0.0085	8.76e-12	0.775322
Right-Cerebellum-White-Matter	rs9912530	17	44836302	T	C	0.2701	-0.0531	0.0059	1.94e-19	0.901391	-	-	-	-
Right-Cerebellum-White-Matter	rs2074404	17	44865439	T	G	0.7783	-	-	-	-	0.0433	0.0078	3.28e-08	0.377308
Right-Cerebellum-White-Matter	rs591349	18	34950576	T	C	0.1063	-	-	-	-	-0.0561	0.0098	1.01e-08	0.305411
Right-Cerebellum-White-Matter	rs9948347	18	35270126	T	C	0.709	-0.0361	0.0058	3.9e-10	0.222284	-	-	-	-
Right-Cerebellum-White-Matter	rs1942029	18	35419197	T	C	0.4388	0.03	0.0053	1.71e-08	0.115775	-	-	-	-
Right-Cerebellum-White-Matter	rs116957498	18	37983470	T	C	0.019	0.1064	0.019	2.34e-08	0.0968706	-	-	-	-
Right-Cerebellum-White-Matter	rs73429770	18	38007071	A	G	0.1763	0.0548	0.0068	1.12e-15	0.697963	0.0501	0.0079	2.03e-10	0.502451
Right-Cerebellum-White-Matter	rs12457908	18	74535018	A	G	0.1502	0.0576	0.0073	3.73e-15	0.66694	-	-	-	-
Right-Cerebellum-White-Matter	rs12456104	18	74548251	A	G	0.8491	-	-	-	-	-0.0524	0.0084	4.88e-10	0.464245
Right-Cerebellum-White-Matter	rs1886693	20	33986566	C	G	0.5959	-0.0346	0.0056	5.68e-10	0.274837	-	-	-	-
Right-Cerebellum-White-Matter	rs112727835	20	34539459	A	G	0.943	-0.0664	0.0114	4.94e-09	0.146546	-	-	-	-
Right-Cerebellum-White-Matter	rs28368435	22	46406695	A	G	0.3815	0.0337	0.0054	3.37e-10	0.219946	0.0347	0.0062	2.08e-08	0.26298
Right-Cerebellum-White-Matter	rs56031937	X	12529776	A	G	0.8265	0.0308	0.0056	4.93e-08	0.0170838	0.0363	0.0065	2.59e-08	0.0638098
Left-Cerebellum-Cortex	rs11580180	1	26867453	A	G	0.2699	-0.0346	0.0062	2.47e-08	0.144252	-	-	-	-
Left-Cerebellum-Cortex	rs74067851	1	40385375	T	C	0.8798	0.0623	0.0086	3.69e-13	0.633158	0.0538	0.0086	3.65e-10	0.326833
Left-Cerebellum-Cortex	rs75117559	1	50882506	T	C	0.9503	-0.0948	0.0127	8.74e-14	0.669407	-0.0787	0.0127	6.37e-10	0.285265
Left-Cerebellum-Cortex	rs1278525	1	50892547	A	G	0.5243	-0.0394	0.0055	1.16e-12	0.568853	-	-	-	-
Left-Cerebellum-Cortex	rs12094601	1	51075040	A	T	0.4327	-	-	-	-	0.0371	0.0056	2.94e-11	0.421632
Left-Cerebellum-Cortex	rs10888711	1	51397457	A	T	0.4252	0.0446	0.0056	1.53e-15	0.802957	-	-	-	-
Left-Cerebellum-Cortex	rs72908878	1	51554925	A	G	0.9469	-0.1334	0.0123	2.35e-27	0.999045	-	-	-	-
Left-Cerebellum-Cortex	rs57401684	1	51571884	A	T	0.0742	-	-	-	-	0.104	0.0106	7.56e-23	0.990569
Left-Cerebellum-Cortex	rs77047833	1	52114391	A	G	0.96	-0.0952	0.0141	1.68e-11	0.452743	-0.081	0.0142	1.11e-08	0.178782
Left-Cerebellum-Cortex	rs2748444	1	76010959	T	C	0.8492	0.0547	0.0077	1.7e-12	0.557345	0.0526	0.0078	1.28e-11	0.47122
Left-Cerebellum-Cortex	rs2745255	1	176532195	C	G	0.6148	-	-	-	-	0.0385	0.0057	1.27e-11	0.461455
Left-Cerebellum-Cortex	rs240101	1	176547835	A	G	0.6295	0.0431	0.0057	4.48e-14	0.691116	-	-	-	-
Left-Cerebellum-Cortex	rs144673025	1	223178026	T	C	0.993	0.2251	0.0332	1.28e-11	0.465442	0.2026	0.0333	1.12e-09	0.266552
Left-Cerebellum-Cortex	rs76923341	1	227441351	A	T	0.1631	0.0506	0.0077	4.07e-11	0.457189	0.0484	0.0077	3.06e-10	0.367875
Left-Cerebellum-Cortex	rs9428576	1	243662027	T	C	0.5651	-0.0402	0.0056	5.85e-13	0.597004	-0.034	0.0056	1.22e-09	0.263304
Left-Cerebellum-Cortex	rs1863806	2	16130064	T	C	0.6119	-0.0393	0.0058	9.06e-12	0.509265	-	-	-	-
Left-Cerebellum-Cortex	rs144137208	2	16265986	T	C	0.2413	-	-	-	-	-0.0419	0.0076	3.1e-08	0.37245
Left-Cerebellum-Cortex	rs11096716	2	16366420	C	G	0.3168	-0.0399	0.0062	1.01e-10	0.442258	-0.0361	0.0062	5.06e-09	0.257429
Left-Cerebellum-Cortex	rs55795022	2	16386265	A	T	0.171	-0.0641	0.0084	1.63e-14	0.926334	-0.0476	0.0084	1.32e-08	0.372152
Left-Cerebellum-Cortex	rs7588667	2	16441939	A	T	0.9275	0.0625	0.0107	4.73e-09	0.206411	-	-	-	-
Left-Cerebellum-Cortex	rs2542212	2	217803906	A	G	0.0348	-0.1044	0.0162	1.28e-10	0.507224	-0.0992	0.0163	1.19e-09	0.402337
Left-Cerebellum-Cortex	rs2234675	2	223085955	T	G	0.0423	-0.1539	0.0137	2.84e-29	0.999673	-0.1246	0.0138	1.43e-19	0.955727
Left-Cerebellum-Cortex	rs16863647	2	223145477	C	G	0.2494	-0.0361	0.0064	1.72e-08	0.161808	-	-	-	-
Left-Cerebellum-Cortex	rs114895876	3	127352970	A	G	0.9888	0.1563	0.0263	2.73e-09	0.226641	0.1512	0.0263	8.9e-09	0.183147
Left-Cerebellum-Cortex	rs2172442	4	4762383	C	G	0.6799	0.0595	0.0059	1.42e-23	0.99355	0.0451	0.006	4e-14	0.713433
Left-Cerebellum-Cortex	rs2703102	4	77923638	C	G	0.6075	-0.0348	0.0057	9.85e-10	0.276201	-0.0364	0.0057	1.92e-10	0.355427
Left-Cerebellum-Cortex	rs2199936	4	89045331	A	G	0.1145	-0.0501	0.0086	6.66e-09	0.18628	-	-	-	-
Left-Cerebellum-Cortex	rs2231142	4	89052323	T	G	0.1142	-	-	-	-	-0.0494	0.0087	1.18e-08	0.168386
Left-Cerebellum-Cortex	rs13107325	4	103188709	T	C	0.0713	-	-	-	-	0.1264	0.0108	1.53e-31	0.999937
Left-Cerebellum-Cortex	rs4336173	4	145066951	A	T	0.3714	0.035	0.0063	3.5e-08	0.268431	-	-	-	-
Left-Cerebellum-Cortex	rs10033964	4	145124768	A	T	0.3867	-	-	-	-	0.0334	0.0057	6.26e-09	0.211021
Left-Cerebellum-Cortex	rs7340949	4	145590933	A	G	0.512	-0.0326	0.0055	3.98e-09	0.213679	-	-	-	-
Left-Cerebellum-Cortex	rs13131837	4	145614984	A	G	0.4912	-	-	-	-	0.0308	0.0055	2.7e-08	0.14675
Left-Cerebellum-Cortex	rs11727676	4	145659064	T	C	0.9052	0.072	0.0094	2.44e-14	0.718452	0.0583	0.0094	6.73e-10	0.285975
Left-Cerebellum-Cortex	rs11733300	4	146133826	A	G	0.4426	-0.0307	0.0056	3.62e-08	0.137183	-	-	-	-
Left-Cerebellum-Cortex	rs7733290	5	38755337	A	G	0.4549	0.0322	0.0056	7.58e-09	0.192604	-	-	-	-
Left-Cerebellum-Cortex	rs17413044	5	53476717	A	C	0.2067	-0.0542	0.0069	2.85e-15	0.794807	-0.0408	0.0069	3.04e-09	0.232473
Left-Cerebellum-Cortex	rs39641	5	53511060	A	T	0.7249	-0.0412	0.0065	1.79e-10	0.423792	-	-	-	-
Left-Cerebellum-Cortex	rs55803832	5	81920587	A	C	0.6497	-	-	-	-	-0.0323	0.0058	2.6e-08	0.14732
Left-Cerebellum-Cortex	rs6452775	5	87470240	T	G	0.8943	-	-	-	-	0.0536	0.009	2.91e-09	0.228737
Left-Cerebellum-Cortex	rs4574540	5	124067628	A	G	0.6418	-0.0328	0.0058	2.08e-08	0.169452	-	-	-	-
Left-Cerebellum-Cortex	rs10900828	5	133836294	T	G	0.4128	0.0452	0.0058	5.95e-15	0.818795	0.0396	0.0058	8.26e-12	0.548437
Left-Cerebellum-Cortex	rs4711000	6	22099484	T	C	0.5503	0.0352	0.0056	2.44e-10	0.327755	0.0319	0.0056	1.05e-08	0.179864
Left-Cerebellum-Cortex	rs1281932	6	32587350	A	G	0.1912	-	-	-	-	-0.0411	0.0072	9.95e-09	0.202522
Left-Cerebellum-Cortex	rs2820230	6	35012829	T	C	0.4116	0.0317	0.0056	1.6e-08	0.160485	-	-	-	-
Left-Cerebellum-Cortex	rs9394413	6	37106329	T	C	0.3512	-0.0336	0.0058	7.02e-09	0.192951	-	-	-	-
Left-Cerebellum-Cortex	rs182613	6	99768894	T	C	0.6193	-0.0337	0.0057	3.47e-09	0.219387	-	-	-	-
Left-Cerebellum-Cortex	rs9402716	6	99827314	T	C	0.3368	-	-	-	-	-0.0392	0.0059	2.56e-11	0.43834
Left-Cerebellum-Cortex	rs522862	6	100139610	A	G	0.1954	-0.054	0.007	7.84e-15	0.7485	-	-	-	-
Left-Cerebellum-Cortex	rs13217795	6	108974098	T	C	0.7033	0.0361	0.006	2.11e-09	0.230296	-	-	-	-
Left-Cerebellum-Cortex	rs9398173	6	109000316	T	C	0.2885	-	-	-	-	-0.0352	0.0061	8.28e-09	0.185783
Left-Cerebellum-Cortex	rs75343521	6	126732511	T	C	0.0403	0.0957	0.014	8e-12	0.471512	0.0812	0.014	7.15e-09	0.187526
Left-Cerebellum-Cortex	rs2039735	6	126745076	T	C	0.5444	-	-	-	-	-0.0311	0.0055	2.13e-08	0.1528
Left-Cerebellum-Cortex	rs79398770	6	127277488	A	G	0.9611	-0.0823	0.0144	1.11e-08	0.183269	-	-	-	-
Left-Cerebellum-Cortex	rs34909950	7	42143340	T	C	0.5825	-0.0324	0.0056	8.66e-09	0.18822	-	-	-	-
Left-Cerebellum-Cortex	rs4595016	7	45992015	T	C	0.4419	0.0313	0.0056	2.85e-08	0.15659	-	-	-	-
Left-Cerebellum-Cortex	rs977791	7	50759158	T	G	0.861	-	-	-	-	0.0441	0.0081	4.31e-08	0.137379
Left-Cerebellum-Cortex	rs12536500	7	50808033	T	C	0.2495	-0.0364	0.0064	1.15e-08	0.171225	-	-	-	-
Left-Cerebellum-Cortex	rs2529269	7	74285969	T	C	0.2845	-	-	-	-	0.0346	0.0063	4.47e-08	0.16121
Left-Cerebellum-Cortex	rs2286162	7	98955804	T	C	0.874	-0.0523	0.009	5.84e-09	0.311908	-	-	-	-
Left-Cerebellum-Cortex	rs35061193	7	100178177	T	C	0.4767	0.0327	0.0056	4.27e-09	0.216767	0.0332	0.0056	2.55e-09	0.238257
Left-Cerebellum-Cortex	rs11768056	7	156065997	A	T	0.2338	-0.0388	0.0071	3.92e-08	0.224375	-	-	-	-
Left-Cerebellum-Cortex	rs4537191	7	156083152	T	C	0.5823	-	-	-	-	0.0587	0.0056	1.68e-25	0.997662
Left-Cerebellum-Cortex	rs4304216	7	156092669	A	T	0.4166	-0.058	0.0056	5.57e-25	0.996794	-	-	-	-
Left-Cerebellum-Cortex	rs79961526	7	156153478	A	G	0.0578	0.0776	0.0119	7.67e-11	0.391671	0.0782	0.0119	5.65e-11	0.410426
Left-Cerebellum-Cortex	rs36071136	7	156166303	C	G	0.5746	-	-	-	-	-0.0544	0.0056	3.31e-22	0.987434
Left-Cerebellum-Cortex	rs57131976	7	156167072	A	C	0.4253	0.0516	0.0056	3e-20	0.967335	-	-	-	-
Left-Cerebellum-Cortex	rs55875319	7	156246273	A	G	0.6215	-	-	-	-	0.0337	0.0058	5.15e-09	0.217835
Left-Cerebellum-Cortex	rs2280716	7	156253492	T	C	0.8031	-0.05	0.007	7.43e-13	0.591891	-0.0472	0.007	1.37e-11	0.466099
Left-Cerebellum-Cortex	rs62482611	7	156257004	A	T	0.908	0.0624	0.0098	2.04e-10	0.383576	-	-	-	-
Left-Cerebellum-Cortex	rs7799972	7	156370803	A	G	0.2083	-0.0462	0.007	5.44e-11	0.464793	-0.0388	0.0071	3.7e-08	0.172013
Left-Cerebellum-Cortex	rs2929455	8	9083433	A	T	0.5237	-	-	-	-	-0.0344	0.0056	6.16e-10	0.294436
Left-Cerebellum-Cortex	rs2929309	8	9083771	A	C	0.4764	0.0326	0.0055	4.06e-09	0.212559	-	-	-	-
Left-Cerebellum-Cortex	rs7014663	8	9587275	T	G	0.6339	0.0326	0.0057	1.23e-08	0.167866	-	-	-	-
Left-Cerebellum-Cortex	rs4841410	8	10520548	A	G	0.4234	-	-	-	-	0.0344	0.0057	1.21e-09	0.27652
Left-Cerebellum-Cortex	rs10090444	8	10745469	C	G	0.452	-0.0315	0.0056	1.44e-08	0.165908	-	-	-	-
Left-Cerebellum-Cortex	rs13255193	8	11309192	T	C	0.4525	-	-	-	-	-0.0323	0.0056	6.9e-09	0.196027
Left-Cerebellum-Cortex	rs12386974	8	11400628	C	G	0.5084	0.0324	0.0055	4.75e-09	0.205644	-	-	-	-
Left-Cerebellum-Cortex	rs13282806	8	59848644	A	C	0.1395	-0.0443	0.008	2.91e-08	0.143558	-	-	-	-
Left-Cerebellum-Cortex	rs28417457	8	59868452	A	C	0.7106	-	-	-	-	0.0353	0.0062	9.42e-09	0.190418
Left-Cerebellum-Cortex	rs1693560	8	101680292	A	G	0.5352	-0.0349	0.0056	3.58e-10	0.317084	-	-	-	-
Left-Cerebellum-Cortex	rs10110223	8	120887566	A	G	0.5472	-0.0366	0.0056	4.6e-11	0.403715	-0.0378	0.0056	1.19e-11	0.470827
Left-Cerebellum-Cortex	rs35807050	8	142040409	A	T	0.5864	0.0461	0.0056	2.55e-16	0.850702	0.0412	0.0056	2.84e-13	0.63651
Left-Cerebellum-Cortex	rs9410491	9	92124592	T	C	0.1839	-0.0443	0.0072	9.19e-10	0.292576	-	-	-	-
Left-Cerebellum-Cortex	rs7848144	9	98517251	T	C	0.295	-	-	-	-	-0.0336	0.0061	3.46e-08	0.14211
Left-Cerebellum-Cortex	rs118017926	9	109626812	T	C	0.9742	0.109	0.0175	4.23e-10	0.304354	0.11	0.0175	3.09e-10	0.320402
Left-Cerebellum-Cortex	rs10759832	9	118930313	T	C	0.6118	-0.0502	0.0057	9.57e-19	0.938653	-	-	-	-
Left-Cerebellum-Cortex	rs7026018	9	118942646	A	T	0.3877	-	-	-	-	0.0408	0.0057	9.46e-13	0.591863
Left-Cerebellum-Cortex	rs72754248	9	119061396	A	G	0.0706	0.2053	0.0108	7.43e-81	1	0.1924	0.0108	9.27e-71	1
Left-Cerebellum-Cortex	rs72754249	9	119064017	T	C	0.9947	-0.2324	0.038	9.51e-10	0.264937	-0.2392	0.038	3.15e-10	0.329751
Left-Cerebellum-Cortex	rs1885983	9	119078356	A	G	0.3421	-0.0383	0.0058	4.92e-11	0.398378	-	-	-	-
Left-Cerebellum-Cortex	rs10817872	9	119125449	A	T	0.6157	-0.0344	0.0057	1.88e-09	0.251908	-	-	-	-
Left-Cerebellum-Cortex	rs117674093	9	119242694	T	C	0.938	0.0657	0.0114	8.96e-09	0.178055	-	-	-	-
Left-Cerebellum-Cortex	rs1861881	9	119312256	T	G	0.313	-0.0447	0.006	6.6e-14	0.682333	-0.038	0.006	2.14e-10	0.339561
Left-Cerebellum-Cortex	rs75049376	10	23484966	A	G	0.899	0.0601	0.0092	7.13e-11	0.391752	0.0533	0.0092	8.24e-09	0.194125
Left-Cerebellum-Cortex	rs11818980	10	73872574	T	C	0.4893	0.0302	0.0055	4.97e-08	0.12787	-	-	-	-
Left-Cerebellum-Cortex	rs10883725	10	104235956	C	G	0.3544	-	-	-	-	-0.0388	0.0058	2.34e-11	0.442143
Left-Cerebellum-Cortex	rs7092622	10	104249919	T	G	0.647	0.035	0.0058	1.49e-09	0.251308	-	-	-	-
Left-Cerebellum-Cortex	rs55993230	10	114804348	C	G	0.0903	0.0542	0.0097	2.42e-08	0.155928	0.0553	0.0097	1.38e-08	0.178478
Left-Cerebellum-Cortex	rs4752582	10	123443605	A	G	0.9247	-0.0789	0.0105	5.87e-14	0.691627	-0.0697	0.0105	3.65e-11	0.421819
Left-Cerebellum-Cortex	rs932287	11	9044767	A	G	0.6567	-0.0325	0.0059	3.17e-08	0.148988	-	-	-	-
Left-Cerebellum-Cortex	rs1883099	11	9063570	A	G	0.5087	-	-	-	-	-0.0313	0.0056	2.66e-08	0.163791
Left-Cerebellum-Cortex	rs10838264	11	44357711	T	C	0.5955	-	-	-	-	-0.0326	0.0056	6.99e-09	0.190067
Left-Cerebellum-Cortex	rs6591508	11	58943265	A	C	0.309	-0.0376	0.006	3.95e-10	0.313785	-0.0366	0.006	1.18e-09	0.268944
Left-Cerebellum-Cortex	rs174555	11	61579760	T	C	0.6897	-0.04	0.006	1.85e-11	0.435721	-	-	-	-
Left-Cerebellum-Cortex	rs174600	11	61622227	T	C	0.6712	-	-	-	-	-0.0336	0.0059	1.33e-08	0.173303
Left-Cerebellum-Cortex	rs1564013	11	110002744	A	G	0.2794	-	-	-	-	-0.035	0.0063	2.44e-08	0.167744
Left-Cerebellum-Cortex	rs630707	11	126057374	C	G	0.2045	-	-	-	-	0.0397	0.007	1.53e-08	0.190892
Left-Cerebellum-Cortex	rs630034	12	4092365	A	G	0.4743	0.036	0.0056	1.53e-10	0.377147	0.033	0.0056	4.8e-09	0.229234
Left-Cerebellum-Cortex	rs7310976	12	4100116	T	C	0.3373	0.0365	0.0061	2.74e-09	0.301967	-	-	-	-
Left-Cerebellum-Cortex	rs9668173	12	92963510	A	G	0.1203	-0.0487	0.0086	1.32e-08	0.177964	-	-	-	-
Left-Cerebellum-Cortex	rs4301837	12	102336310	T	C	0.5051	0.0369	0.0056	3.85e-11	0.429465	0.0315	0.0056	1.84e-08	0.171085
Left-Cerebellum-Cortex	rs35872193	12	102442428	A	T	0.7931	-0.0776	0.0069	1.44e-29	0.9998	-	-	-	-
Left-Cerebellum-Cortex	rs4611262	12	102502759	T	C	0.2193	-	-	-	-	-0.0369	0.0068	4.83e-08	0.138264
Left-Cerebellum-Cortex	rs78360407	12	102751205	A	C	0.0448	-0.0896	0.0133	1.83e-11	0.439148	-	-	-	-
Left-Cerebellum-Cortex	rs1533688	12	102772745	T	C	0.2247	-	-	-	-	0.0363	0.0066	4.54e-08	0.131451
Left-Cerebellum-Cortex	rs11111278	12	102846020	A	G	0.7921	-	-	-	-	-0.073	0.0068	1.53e-26	0.998747
Left-Cerebellum-Cortex	rs79519967	12	102850462	T	G	0.9911	0.1732	0.0295	4.2e-09	0.211312	-	-	-	-
Left-Cerebellum-Cortex	rs73181000	12	102861183	A	G	0.0268	0.0939	0.0171	3.85e-08	0.131991	-	-	-	-
Left-Cerebellum-Cortex	rs703545	12	102943000	A	G	0.1581	-0.074	0.0077	3.78e-22	0.988362	-0.0652	0.0077	2e-17	0.91088
Left-Cerebellum-Cortex	rs78929770	12	102946220	A	C	0.0883	0.0802	0.0097	1.56e-16	0.854131	-	-	-	-
Left-Cerebellum-Cortex	rs111891989	12	120801099	C	G	0.9394	0.0734	0.0116	2.43e-10	0.327979	0.0643	0.0116	3.4e-08	0.14159
Left-Cerebellum-Cortex	rs1727316	12	123618603	T	C	0.7861	-	-	-	-	-0.0481	0.0072	2.96e-11	0.573757
Left-Cerebellum-Cortex	rs2664303	14	99750520	T	C	0.4225	0.0329	0.0057	8.39e-09	0.210025	-	-	-	-
Left-Cerebellum-Cortex	rs8039459	15	82320426	C	G	0.3053	-0.0369	0.006	7.94e-10	0.276261	-	-	-	-
Left-Cerebellum-Cortex	rs72749576	15	82507919	C	G	0.9302	-0.0649	0.0108	2.15e-09	0.234361	-	-	-	-
Left-Cerebellum-Cortex	rs72753908	15	83334856	T	C	0.075	0.062	0.0105	3.53e-09	0.216601	-	-	-	-
Left-Cerebellum-Cortex	rs7402734	15	99158301	A	T	0.4761	0.0343	0.0057	2.28e-09	0.289483	-	-	-	-
Left-Cerebellum-Cortex	rs1724429	17	43662020	A	G	0.8104	0.0405	0.0072	1.97e-08	0.180409	-	-	-	-
Left-Cerebellum-Cortex	rs2696551	17	44349234	T	C	0.1784	-0.0468	0.0076	6.09e-10	0.370768	-	-	-	-
Left-Cerebellum-Cortex	rs199519	17	44853924	A	G	0.7616	0.0361	0.0065	2.89e-08	0.145763	-	-	-	-
Left-Cerebellum-Cortex	rs59384167	19	18444518	A	C	0.5508	0.0341	0.0056	1.32e-09	0.273214	-	-	-	-
Left-Cerebellum-Cortex	rs1886693	20	33986566	C	G	0.5959	-	-	-	-	-0.0323	0.0059	4.97e-08	0.178755
Left-Cerebellum-Cortex	rs2284017	22	37096927	T	C	0.4354	-0.031	0.0056	2.69e-08	0.14496	-	-	-	-
Left-Cerebellum-Cortex	rs28368435	22	46406695	A	G	0.3815	-	-	-	-	0.0312	0.0057	4.47e-08	0.131293
Left-Cerebellum-Cortex	rs41304739	X	19554649	T	C	0.128	0.0386	0.0069	1.9e-08	0.0387208	-	-	-	-
Right-Cerebellum-Cortex	rs11580180	1	26867453	A	G	0.2699	-0.0358	0.0061	3.92e-09	0.181653	-	-	-	-
Right-Cerebellum-Cortex	rs10902750	1	26876245	T	G	0.7247	-	-	-	-	0.035	0.006	6.68e-09	0.162671
Right-Cerebellum-Cortex	rs183365862	1	37991069	A	G	0.0069	-	-	-	-	-0.1913	0.0328	5.67e-09	0.17744
Right-Cerebellum-Cortex	rs185277562	1	38079075	T	C	0.0056	-0.2025	0.0364	2.63e-08	0.12875	-	-	-	-
Right-Cerebellum-Cortex	rs74067851	1	40385375	T	C	0.8798	0.0604	0.0084	6.29e-13	0.564923	0.0577	0.0084	6.27e-12	0.465819
Right-Cerebellum-Cortex	rs2784129	1	50860499	A	C	0.4806	-0.0383	0.0054	1.42e-12	0.50744	-	-	-	-
Right-Cerebellum-Cortex	rs75117559	1	50882506	T	C	0.9503	-0.0998	0.0124	1.09e-15	0.773129	-	-	-	-
Right-Cerebellum-Cortex	rs10888690	1	50960521	T	C	0.5907	-	-	-	-	-0.0313	0.0055	1.33e-08	0.146209
Right-Cerebellum-Cortex	rs12083078	1	51066950	A	T	0.1518	-	-	-	-	0.054	0.0076	9.02e-13	0.533715
Right-Cerebellum-Cortex	rs6678244	1	51418437	A	G	0.585	-0.044	0.0056	4.05e-15	0.772335	-	-	-	-
Right-Cerebellum-Cortex	rs12043819	1	51564991	T	C	0.388	-	-	-	-	-0.0351	0.0057	6.05e-10	0.287068
Right-Cerebellum-Cortex	rs57401684	1	51571884	A	T	0.0742	-	-	-	-	0.103	0.0103	2.2e-23	0.988491
Right-Cerebellum-Cortex	rs12072311	1	51572465	C	G	0.0532	0.1356	0.0121	2.87e-29	0.999429	-	-	-	-
Right-Cerebellum-Cortex	rs77047833	1	52114391	A	G	0.96	-0.0985	0.0139	1.14e-12	0.526411	-0.0905	0.0139	6.93e-11	0.348915
Right-Cerebellum-Cortex	rs2748444	1	76010959	T	C	0.8492	0.0542	0.0076	9.16e-13	0.53707	-	-	-	-
Right-Cerebellum-Cortex	rs2779490	1	76014288	T	C	0.1509	-	-	-	-	-0.0531	0.0076	2.69e-12	0.4922
Right-Cerebellum-Cortex	rs2294654	1	176525194	A	G	0.3543	-	-	-	-	-0.0397	0.0061	9.13e-11	0.490384
Right-Cerebellum-Cortex	rs240101	1	176547835	A	G	0.6296	0.0436	0.0056	7.06e-15	0.714905	-	-	-	-
Right-Cerebellum-Cortex	rs144673025	1	223178026	T	C	0.993	0.217	0.0326	2.67e-11	0.389777	0.1973	0.0325	1.32e-09	0.226734
Right-Cerebellum-Cortex	rs76923341	1	227441351	A	T	0.1631	0.0461	0.0075	8.44e-10	0.279931	0.0438	0.0075	5.5e-09	0.205033
Right-Cerebellum-Cortex	rs7523102	1	243672074	T	C	0.2661	0.0424	0.0062	7.54e-12	0.462044	-	-	-	-
Right-Cerebellum-Cortex	rs1863806	2	16130064	T	C	0.6119	-0.0378	0.0056	2.26e-11	0.426273	-0.0313	0.0057	3.07e-08	0.137467
Right-Cerebellum-Cortex	rs144137208	2	16265986	T	C	0.2413	-0.0415	0.0074	1.98e-08	0.353543	-	-	-	-
Right-Cerebellum-Cortex	rs11096716	2	16366420	C	G	0.3168	-0.0381	0.006	2.9e-10	0.350203	-	-	-	-
Right-Cerebellum-Cortex	rs55795022	2	16386265	A	T	0.171	-0.0647	0.0082	2.61e-15	0.934947	-0.0509	0.0082	4.98e-10	0.511731
Right-Cerebellum-Cortex	rs7588667	2	16441939	A	T	0.9275	0.0598	0.0105	1.07e-08	0.154065	-	-	-	-
Right-Cerebellum-Cortex	rs334011	2	179123605	T	C	0.3798	0.0331	0.0056	3.79e-09	0.194983	-	-	-	-
Right-Cerebellum-Cortex	rs56272121	2	217782371	T	C	0.0325	-	-	-	-	-0.1086	0.0153	1.43e-12	0.524588
Right-Cerebellum-Cortex	rs2542212	2	217803906	A	G	0.0348	-0.1088	0.0159	7.92e-12	0.598243	-	-	-	-
Right-Cerebellum-Cortex	rs2234675	2	223085955	T	G	0.0423	-0.15	0.0134	5.23e-29	0.999273	-0.1161	0.0135	6.25e-18	0.887722
Right-Cerebellum-Cortex	rs7608595	2	223088415	T	C	0.436	-0.0302	0.0055	4.7e-08	0.12079	-	-	-	-
Right-Cerebellum-Cortex	rs16863647	2	223145477	C	G	0.2494	-0.0369	0.0063	3.96e-09	0.187251	-	-	-	-
Right-Cerebellum-Cortex	rs114895876	3	127352970	A	G	0.9888	0.1575	0.0257	9.43e-10	0.237663	0.1491	0.0257	6.76e-09	0.166864
Right-Cerebellum-Cortex	rs2172442	4	4762383	C	G	0.6799	0.0559	0.0058	7.71e-22	0.977548	0.0438	0.0058	5.67e-14	0.651523
Right-Cerebellum-Cortex	rs2703102	4	77923638	C	G	0.6075	-0.0353	0.0056	2.51e-10	0.300022	-	-	-	-
Right-Cerebellum-Cortex	rs2645664	4	77927345	A	G	0.6075	-	-	-	-	-0.0337	0.0056	1.59e-09	0.227296
Right-Cerebellum-Cortex	rs2199936	4	89045331	A	G	0.1145	-0.0484	0.0085	1.08e-08	0.147669	-0.0471	0.0085	2.57e-08	0.12171
Right-Cerebellum-Cortex	rs34723698	4	102581150	A	G	0.0125	-	-	-	-	0.1369	0.0246	2.62e-08	0.131078
Right-Cerebellum-Cortex	rs13107325	4	103188709	T	C	0.0713	0.0645	0.0106	1.01e-09	0.239689	0.128	0.0106	1.04e-33	0.999961
Right-Cerebellum-Cortex	rs61214587	4	145040537	A	G	0.3987	-	-	-	-	0.0324	0.0059	5e-08	0.179458
Right-Cerebellum-Cortex	rs4336173	4	145066951	A	T	0.3714	0.0346	0.0062	2.63e-08	0.250525	-	-	-	-
Right-Cerebellum-Cortex	rs13103733	4	145523071	T	C	0.427	0.031	0.0054	1.29e-08	0.142615	-	-	-	-
Right-Cerebellum-Cortex	rs13131837	4	145614984	A	G	0.4912	-	-	-	-	0.0311	0.0054	9.53e-09	0.156826
Right-Cerebellum-Cortex	rs11727676	4	145659064	T	C	0.9052	0.068	0.0092	1.99e-13	0.595997	0.0589	0.0092	1.79e-10	0.303324
Right-Cerebellum-Cortex	rs11733300	4	146133826	A	G	0.4426	-0.0303	0.0055	2.8e-08	0.125098	-	-	-	-
Right-Cerebellum-Cortex	rs7733290	5	38755337	A	G	0.4549	0.03	0.0055	3.69e-08	0.118681	-	-	-	-
Right-Cerebellum-Cortex	rs17413044	5	53476717	A	C	0.2068	-0.0478	0.0067	1.12e-12	0.532959	-	-	-	-
Right-Cerebellum-Cortex	rs39641	5	53511060	A	T	0.7249	-0.041	0.0063	8.63e-11	0.413812	-	-	-	-
Right-Cerebellum-Cortex	rs6452775	5	87470240	T	G	0.8943	0.0488	0.0088	3.12e-08	0.122403	0.0552	0.0088	4.13e-10	0.273458
Right-Cerebellum-Cortex	rs4574540	5	124067628	A	G	0.6418	-0.0321	0.0057	2.15e-08	0.146329	-	-	-	-
Right-Cerebellum-Cortex	rs10900828	5	133836294	T	G	0.4128	0.043	0.0057	3.17e-14	0.726026	-	-	-	-
Right-Cerebellum-Cortex	rs1476096	5	133837021	A	C	0.4141	-	-	-	-	0.0407	0.0056	3.62e-13	0.610073
Right-Cerebellum-Cortex	rs4711000	6	22099484	T	C	0.5503	0.0357	0.0054	6.02e-11	0.353838	0.0344	0.0055	2.75e-10	0.287657
Right-Cerebellum-Cortex	rs34977123	6	32555736	A	G	0.8776	-	-	-	-	0.0498	0.009	3.67e-08	0.215893
Right-Cerebellum-Cortex	rs9272400	6	32604898	A	G	0.6775	-	-	-	-	-0.037	0.0065	1.28e-08	0.30537
Right-Cerebellum-Cortex	rs13191889	6	35013209	A	G	0.4116	0.0337	0.0055	8.04e-10	0.238542	0.0327	0.0055	2.78e-09	0.197367
Right-Cerebellum-Cortex	rs6921165	6	37104492	A	G	0.351	-0.0332	0.0057	5.69e-09	0.178195	-	-	-	-
Right-Cerebellum-Cortex	rs182613	6	99768894	T	C	0.6193	-0.0355	0.0056	2.16e-10	0.300032	-0.0337	0.0056	1.65e-09	0.219387
Right-Cerebellum-Cortex	rs522862	6	100139610	A	G	0.1954	-0.0527	0.0068	9.96e-15	0.699265	-0.0444	0.0068	7.34e-11	0.337192
Right-Cerebellum-Cortex	rs13217795	6	108974098	T	C	0.7033	0.0371	0.0059	3.57e-10	0.271849	0.0383	0.0059	9.82e-11	0.326191
Right-Cerebellum-Cortex	rs557163577	6	111159512	A	G	0.9889	-	-	-	-	-0.1487	0.0262	1.33e-08	0.159027
Right-Cerebellum-Cortex	rs75343521	6	126732511	T	C	0.0404	0.0911	0.0137	3.07e-11	0.372914	0.0922	0.0137	1.87e-11	0.394213
Right-Cerebellum-Cortex	rs1361109	6	126771143	T	C	0.4552	-	-	-	-	0.0392	0.0054	4.76e-13	0.551263
Right-Cerebellum-Cortex	rs62439182	6	127243314	T	C	0.9144	-	-	-	-	0.053	0.0097	4.43e-08	0.112075
Right-Cerebellum-Cortex	rs79398770	6	127277488	A	G	0.9611	-0.0775	0.0141	3.97e-08	0.121328	-0.0781	0.0141	3.25e-08	0.128146
Right-Cerebellum-Cortex	rs2273215	6	170586082	A	G	0.4544	0.0305	0.0055	2.79e-08	0.133325	-	-	-	-
Right-Cerebellum-Cortex	rs2295205	6	170592293	C	G	0.7466	0.0387	0.0066	5.1e-09	0.261091	-	-	-	-
Right-Cerebellum-Cortex	rs34909950	7	42143340	T	C	0.5825	-0.0329	0.0055	2.38e-09	0.207834	-	-	-	-
Right-Cerebellum-Cortex	rs2953661	7	74245012	A	C	0.2937	-	-	-	-	0.0425	0.0071	1.94e-09	0.532002
Right-Cerebellum-Cortex	rs35061193	7	100178177	T	C	0.4766	0.0338	0.0055	5.36e-10	0.26563	0.0318	0.0055	5.72e-09	0.180928
Right-Cerebellum-Cortex	rs11768056	7	156065997	A	T	0.2338	-0.0405	0.0069	4.89e-09	0.290569	-	-	-	-
Right-Cerebellum-Cortex	rs4304216	7	156092669	A	T	0.4166	-0.0566	0.0055	7.72e-25	0.994269	-0.0527	0.0055	1.08e-21	0.976047
Right-Cerebellum-Cortex	rs79961526	7	156153478	A	G	0.0578	0.0792	0.0117	1.17e-11	0.433226	0.0874	0.0117	7.05e-14	0.649509
Right-Cerebellum-Cortex	rs36071136	7	156166303	C	G	0.5746	-0.0479	0.0055	2.58e-18	0.906508	-0.0504	0.0055	4.35e-20	0.952851
Right-Cerebellum-Cortex	rs2280716	7	156253492	T	C	0.8031	-0.0455	0.0068	2.61e-11	0.38994	-0.0459	0.0068	1.93e-11	0.407889
Right-Cerebellum-Cortex	rs62482611	7	156257004	A	T	0.908	0.057	0.0096	2.95e-09	0.228898	0.0553	0.0096	8.82e-09	0.18862
Right-Cerebellum-Cortex	rs7799972	7	156370803	A	G	0.2083	-0.0431	0.0069	4.04e-10	0.326916	-0.0388	0.0069	1.9e-08	0.17181
Right-Cerebellum-Cortex	rs2929455	8	9083433	A	T	0.5237	-	-	-	-	-0.035	0.0054	1.29e-10	0.324656
Right-Cerebellum-Cortex	rs2929309	8	9083771	A	C	0.4764	0.0332	0.0054	9.33e-10	0.238271	-	-	-	-
Right-Cerebellum-Cortex	rs7014663	8	9587275	T	G	0.6339	0.0317	0.0056	1.59e-08	0.138604	-	-	-	-
Right-Cerebellum-Cortex	rs4368940	8	10526742	T	C	0.412	-	-	-	-	0.0313	0.0056	1.95e-08	0.14733
Right-Cerebellum-Cortex	rs2572397	8	11176403	A	G	0.4454	-0.0306	0.0054	1.65e-08	0.134687	-0.0319	0.0054	4.23e-09	0.178827
Right-Cerebellum-Cortex	rs1693591	8	101673265	T	G	0.5823	-	-	-	-	-0.0354	0.006	3.6e-09	0.322388
Right-Cerebellum-Cortex	rs1693560	8	101680292	A	G	0.5352	-0.0316	0.0055	7.2e-09	0.171928	-	-	-	-
Right-Cerebellum-Cortex	rs10110223	8	120887566	A	G	0.5472	-0.0335	0.0054	7.85e-10	0.246648	-0.0381	0.0054	2.72e-12	0.487884
Right-Cerebellum-Cortex	rs13268108	8	142039586	T	C	0.6092	-	-	-	-	0.0408	0.0056	4.17e-13	0.594838
Right-Cerebellum-Cortex	rs35807050	8	142040409	A	T	0.5864	0.0458	0.0055	1.08e-16	0.840658	-	-	-	-
Right-Cerebellum-Cortex	rs9410491	9	92124592	T	C	0.1839	-0.0409	0.0071	8.28e-09	0.178118	-	-	-	-
Right-Cerebellum-Cortex	rs188651062	9	97957555	A	G	0.9881	-0.1377	0.025	3.76e-08	0.118272	-	-	-	-
Right-Cerebellum-Cortex	rs118017926	9	109626812	T	C	0.9742	0.1168	0.0171	8.28e-12	0.437141	0.1137	0.0171	2.85e-11	0.382547
Right-Cerebellum-Cortex	rs10759832	9	118930313	T	C	0.6118	-0.0488	0.0056	1.82e-18	0.911213	-0.0371	0.0056	2.58e-11	0.388978
Right-Cerebellum-Cortex	rs72754248	9	119061396	A	G	0.0706	0.1983	0.0106	1.17e-78	1	0.184	0.0106	1.13e-67	1
Right-Cerebellum-Cortex	rs72754249	9	119064017	T	C	0.9947	-0.2269	0.0372	1.08e-09	0.22892	-0.2237	0.0372	1.78e-09	0.221995
Right-Cerebellum-Cortex	rs1885983	9	119078356	A	G	0.3422	-0.0365	0.0057	1.66e-10	0.308029	-	-	-	-
Right-Cerebellum-Cortex	rs10817872	9	119125449	A	T	0.6156	-0.0314	0.0056	2.14e-08	0.138829	-	-	-	-
Right-Cerebellum-Cortex	rs12341080	9	119325482	A	G	0.3262	-	-	-	-	0.036	0.0058	5.22e-10	0.264763
Right-Cerebellum-Cortex	rs4836757	9	119326613	A	G	0.5381	-0.0347	0.0055	1.95e-10	0.306248	-	-	-	-
Right-Cerebellum-Cortex	rs4836791	9	119392292	T	C	0.9497	0.089	0.0124	6.83e-13	0.54348	0.0718	0.0124	6.69e-09	0.167021
Right-Cerebellum-Cortex	rs75049376	10	23484966	A	G	0.899	0.0603	0.009	2.57e-11	0.39839	0.0516	0.009	1.19e-08	0.155967
Right-Cerebellum-Cortex	rs3781290	10	104244948	C	G	0.3747	-0.0336	0.0056	2.03e-09	0.211076	-	-	-	-
Right-Cerebellum-Cortex	rs7092622	10	104249919	T	G	0.647	-	-	-	-	0.0408	0.0057	6.45e-13	0.548871
Right-Cerebellum-Cortex	rs55993230	10	114804348	C	G	0.0903	0.057	0.0095	2.15e-09	0.217153	0.052	0.0095	4.75e-08	0.116702
Right-Cerebellum-Cortex	rs4752582	10	123443605	A	G	0.9247	-0.0772	0.0103	6.11e-14	0.645098	-0.0669	0.0103	8.24e-11	0.341474
Right-Cerebellum-Cortex	rs1883099	11	9063570	A	G	0.5087	-0.0303	0.0055	3.93e-08	0.130955	-0.0359	0.0055	6.91e-11	0.373988
Right-Cerebellum-Cortex	rs11042220	11	9218858	A	T	0.7037	0.0331	0.0059	2.73e-08	0.128934	0.0335	0.006	1.91e-08	0.140246
Right-Cerebellum-Cortex	rs903514	11	44352394	A	G	0.4189	-	-	-	-	0.0334	0.0055	1.05e-09	0.22942
Right-Cerebellum-Cortex	rs7950670	11	58943599	A	G	0.6904	-	-	-	-	0.0368	0.0059	3.84e-10	0.278612
Right-Cerebellum-Cortex	rs7925496	11	58943928	A	T	0.6906	0.0365	0.0059	5.25e-10	0.264741	-	-	-	-
Right-Cerebellum-Cortex	rs174560	11	61581764	T	C	0.6847	-0.0379	0.0058	7.69e-11	0.33804	-0.0337	0.0058	7.24e-09	0.16427
Right-Cerebellum-Cortex	rs10750199	11	121932484	T	C	0.377	0.0313	0.0056	2.25e-08	0.132259	0.0321	0.0056	9.61e-09	0.157413
Right-Cerebellum-Cortex	rs631372	11	126078501	T	G	0.7656	-	-	-	-	-0.0378	0.0064	3.14e-09	0.190933
Right-Cerebellum-Cortex	rs630034	12	4092365	A	G	0.4743	0.035	0.0055	2.26e-10	0.324266	0.0306	0.0055	2.88e-08	0.139165
Right-Cerebellum-Cortex	rs7310976	12	4100116	T	C	0.3373	0.035	0.006	6.16e-09	0.235279	-	-	-	-
Right-Cerebellum-Cortex	rs9668173	12	92963510	A	G	0.1203	-0.0459	0.0084	4.48e-08	0.118282	-	-	-	-
Right-Cerebellum-Cortex	rs4301837	12	102336310	T	C	0.505	0.0341	0.0055	4.39e-10	0.281588	-	-	-	-
Right-Cerebellum-Cortex	rs35872193	12	102442428	A	T	0.7931	-	-	-	-	-0.0714	0.0067	2.88e-26	0.997623
Right-Cerebellum-Cortex	rs4611262	12	102502759	T	C	0.2193	-0.0413	0.0066	4.04e-10	0.285428	-	-	-	-
Right-Cerebellum-Cortex	rs187441419	12	102532378	C	G	0.0072	-0.1826	0.032	1.2e-08	0.149447	-	-	-	-
Right-Cerebellum-Cortex	rs1533688	12	102772745	T	C	0.2247	0.0414	0.0065	1.7e-10	0.30426	-	-	-	-
Right-Cerebellum-Cortex	rs11111278	12	102846020	A	G	0.7921	-0.0771	0.0067	1.16e-30	0.999765	-	-	-	-
Right-Cerebellum-Cortex	rs79519967	12	102850462	T	G	0.9911	0.1751	0.0289	1.34e-09	0.226373	-	-	-	-
Right-Cerebellum-Cortex	rs76169231	12	102942969	T	C	0.7961	-	-	-	-	-0.052	0.0067	7.98e-15	0.705056
Right-Cerebellum-Cortex	rs703545	12	102943000	A	G	0.1581	-0.0736	0.0075	9.57e-23	0.987029	-0.0619	0.0075	1.62e-16	0.841777
Right-Cerebellum-Cortex	rs111891989	12	120801099	C	G	0.9394	0.0743	0.0114	6.32e-11	0.350458	-	-	-	-
Right-Cerebellum-Cortex	rs1727316	12	123618603	T	C	0.7861	-	-	-	-	-0.0486	0.0071	6.88e-12	0.596614
Right-Cerebellum-Cortex	rs11622118	14	24742320	T	G	0.081	-	-	-	-	-0.0559	0.0099	1.84e-08	0.13737
Right-Cerebellum-Cortex	rs149044631	14	68900150	T	G	0.0235	-0.1044	0.018	6.91e-09	0.175912	-0.1014	0.018	1.85e-08	0.144342
Right-Cerebellum-Cortex	rs2753404	14	68912686	T	G	0.6781	0.0338	0.0058	6.88e-09	0.174177	-	-	-	-
Right-Cerebellum-Cortex	rs2496482	14	99750164	T	C	0.4208	-	-	-	-	0.0314	0.0056	1.64e-08	0.153781
Right-Cerebellum-Cortex	rs2664303	14	99750520	T	C	0.4225	0.0321	0.0056	9.51e-09	0.178959	-	-	-	-
Right-Cerebellum-Cortex	rs8039459	15	82320426	C	G	0.3053	-0.0336	0.0059	1.09e-08	0.151834	-	-	-	-
Right-Cerebellum-Cortex	rs7169642	15	82360813	T	C	0.4684	-	-	-	-	0.0349	0.0057	1.04e-09	0.318009
Right-Cerebellum-Cortex	rs72749576	15	82507919	C	G	0.9302	-0.0602	0.0106	1.43e-08	0.142978	-0.0598	0.0106	1.82e-08	0.1365
Right-Cerebellum-Cortex	rs72751639	15	83219900	A	G	0.0708	-	-	-	-	0.0581	0.0105	3.53e-08	0.117153
Right-Cerebellum-Cortex	rs7402734	15	99158301	A	T	0.4761	0.0311	0.0056	3.26e-08	0.155785	-	-	-	-
Right-Cerebellum-Cortex	rs2463518	17	43656627	T	C	0.8089	0.0418	0.007	2.7e-09	0.225443	-	-	-	-
Right-Cerebellum-Cortex	rs62073257	17	44412076	A	G	0.7948	0.0433	0.0069	2.9e-10	0.325268	-	-	-	-
Right-Cerebellum-Cortex	rs7226920	18	72962473	T	C	0.2182	-	-	-	-	-0.0366	0.0066	2.62e-08	0.129379
Right-Cerebellum-Cortex	rs1886693	20	33986566	C	G	0.5959	-0.0316	0.0058	4.89e-08	0.154043	-0.033	0.0058	1.16e-08	0.205576
Right-Cerebellum-Cortex	rs2284017	22	37096927	T	C	0.4354	-0.0321	0.0055	4.09e-09	0.183438	-	-	-	-
Right-Cerebellum-Cortex	rs28368435	22	46406695	A	G	0.3815	-	-	-	-	0.0347	0.0056	4.65e-10	0.262901
Right-Cerebellum-Cortex	rs41304739	X	19554649	T	C	0.128	0.0367	0.0067	4.78e-08	0.0257555	-	-	-	-
Right-Cerebellum-Cortex	rs34426815	X	133830925	A	G	0.7614	-	-	-	-	-0.0289	0.0052	3.76e-08	0.0266202
Cbm_Vermis	rs2803310	1	2017297	T	C	0.7009	-0.0481	0.0065	1.66e-13	0.800901	-	-	-	-
Cbm_Vermis	rs4648642	1	2432762	A	G	0.4887	-0.0358	0.006	2.67e-09	0.368403	-	-	-	-
Cbm_Vermis	rs7523024	1	40346001	A	C	0.596	-	-	-	-	0.0361	0.0066	4.69e-08	0.349035
Cbm_Vermis	rs6658111	1	47980916	T	G	0.6352	-	-	-	-	0.0461	0.0068	1.12e-11	0.814651
Cbm_Vermis	rs2765893	1	50829879	A	G	0.4829	-	-	-	-	-0.0358	0.0065	3.32e-08	0.367793
Cbm_Vermis	rs7530673	1	51558856	A	C	0.0748	-	-	-	-	0.0823	0.0124	2.66e-11	0.7698
Cbm_Vermis	rs57401684	1	51571884	A	T	0.0742	0.0844	0.0114	1.11e-13	0.808612	-	-	-	-
Cbm_Vermis	rs5177	1	53711735	C	G	0.4157	-	-	-	-	0.0371	0.0066	1.73e-08	0.411132
Cbm_Vermis	rs12759920	1	75457055	A	T	0.9635	0.1047	0.0162	9.7e-11	0.564097	-	-	-	-
Cbm_Vermis	rs10493557	1	75661014	C	G	0.9585	0.0833	0.0149	2.38e-08	0.241128	-	-	-	-
Cbm_Vermis	rs11163074	1	75775227	A	G	0.5279	-0.0376	0.006	3.01e-10	0.465843	-	-	-	-
Cbm_Vermis	rs187969047	1	76001971	A	G	0.0123	-0.1767	0.0272	8.31e-11	0.546196	-	-	-	-
Cbm_Vermis	rs76934732	1	76013268	A	G	0.1501	-0.1669	0.0084	9.69e-89	1	-	-	-	-
Cbm_Vermis	rs148578909	1	76015538	A	T	0.0135	-0.1934	0.0259	8.61e-14	0.823669	-	-	-	-
Cbm_Vermis	rs74091737	1	76028526	T	C	0.8493	-	-	-	-	0.089	0.0091	1.79e-22	0.999871
Cbm_Vermis	rs548446330	1	76046462	A	G	0.0099	-0.2143	0.03	9.77e-13	0.730417	-	-	-	-
Cbm_Vermis	rs7555627	1	76082708	A	G	0.6831	-0.0447	0.0064	3.42e-12	0.689384	-	-	-	-
Cbm_Vermis	rs76946932	1	76104627	T	C	0.0212	-0.1528	0.0211	4.03e-13	0.799915	-	-	-	-
Cbm_Vermis	rs12145334	1	76168496	A	G	0.2736	-0.0488	0.0068	5.12e-13	0.77881	-	-	-	-
Cbm_Vermis	rs7512780	1	163807632	T	C	0.3086	-0.0486	0.0065	4.74e-14	0.833156	-	-	-	-
Cbm_Vermis	rs10920442	1	202623217	T	C	0.4207	-0.0353	0.006	4.38e-09	0.319114	-	-	-	-
Cbm_Vermis	rs4233695	2	23005982	T	C	0.4161	0.035	0.006	6.97e-09	0.301478	-	-	-	-
Cbm_Vermis	rs360801	2	62955387	A	G	0.6446	0.0345	0.0063	3.72e-08	0.232238	-	-	-	-
Cbm_Vermis	rs34258317	2	88924854	T	C	0.2788	-	-	-	-	0.0442	0.0073	1.19e-09	0.585106
Cbm_Vermis	rs137867756	2	111935619	T	C	0.01	-0.1876	0.0299	3.55e-10	0.453951	-	-	-	-
Cbm_Vermis	rs1257344	2	144598432	A	G	0.5081	-0.0367	0.006	9.15e-10	0.418101	-	-	-	-
Cbm_Vermis	rs9989738	2	179129455	T	C	0.571	0.0397	0.006	4.24e-11	0.565718	-	-	-	-
Cbm_Vermis	rs1263603	2	207927831	A	G	0.5663	-0.0458	0.006	3.37e-14	0.850338	-	-	-	-
Cbm_Vermis	rs2269070	2	208031724	C	G	0.1841	0.0457	0.0077	3.15e-09	0.348778	-	-	-	-
Cbm_Vermis	rs2360675	2	208059640	A	C	0.5549	0.0776	0.006	4.46e-38	1	0.0444	0.0066	1.48e-11	0.804243
Cbm_Vermis	rs867832	3	45090672	A	C	0.3175	-0.0349	0.0064	4.42e-08	0.209604	-	-	-	-
Cbm_Vermis	rs1499982	3	117820386	T	C	0.8561	0.0473	0.0086	3.52e-08	0.240068	-	-	-	-
Cbm_Vermis	rs7643379	3	192619383	A	G	0.4598	-0.0594	0.006	2.15e-23	0.998717	-	-	-	-
Cbm_Vermis	rs13097127	3	192752605	T	C	0.4561	-0.0343	0.006	1.19e-08	0.284939	-	-	-	-
Cbm_Vermis	rs3135848	4	1797741	T	C	0.7293	0.0393	0.0067	4.66e-09	0.322721	-	-	-	-
Cbm_Vermis	rs11133373	4	56215631	C	G	0.6874	-	-	-	-	-0.0417	0.007	3.2e-09	0.530576
Cbm_Vermis	rs2289043	4	96106322	A	G	0.3008	-0.0427	0.0065	4.91e-11	0.558233	-	-	-	-
Cbm_Vermis	rs181397936	4	102569424	A	G	0.9918	-	-	-	-	-0.1998	0.036	2.84e-08	0.381732
Cbm_Vermis	rs34723698	4	102581150	A	G	0.0125	-	-	-	-	0.1852	0.0295	3.54e-10	0.658174
Cbm_Vermis	rs12511373	4	102666785	T	C	0.0966	-	-	-	-	0.0707	0.0112	2.7e-10	0.696305
Cbm_Vermis	rs13107325	4	103188709	T	C	0.0713	0.0887	0.0116	2.2e-14	0.858638	0.2012	0.0127	1.56e-56	1
Cbm_Vermis	rs13103835	4	103232168	T	C	0.6574	-	-	-	-	-0.038	0.0069	3.34e-08	0.382754
Cbm_Vermis	rs6898297	5	112417183	A	G	0.6285	0.0494	0.0062	1.21e-15	0.9152	-	-	-	-
Cbm_Vermis	rs10074318	5	112436568	A	G	0.3212	-	-	-	-	-0.0499	0.007	1.07e-12	0.887126
Cbm_Vermis	rs10519347	5	112593347	T	C	0.3045	-	-	-	-	-0.0392	0.0071	3.36e-08	0.384424
Cbm_Vermis	rs10900828	5	133836294	T	G	0.4128	0.0419	0.0062	1.74e-11	0.672158	-	-	-	-
Cbm_Vermis	rs7701020	5	158369272	A	T	0.6426	0.0385	0.0062	4.41e-10	0.42963	-	-	-	-
Cbm_Vermis	rs11134855	5	173978707	A	C	0.1319	-0.0524	0.0088	2.83e-09	0.35084	-	-	-	-
Cbm_Vermis	rs1034050	6	25492364	A	G	0.3437	0.0353	0.0063	1.81e-08	0.254864	-	-	-	-
Cbm_Vermis	rs1800562	6	26093141	A	G	0.0762	-	-	-	-	-0.0859	0.0123	2.78e-12	0.854663
Cbm_Vermis	rs9398172	6	108994826	A	G	0.7102	-	-	-	-	0.0433	0.0071	1.26e-09	0.565158
Cbm_Vermis	rs145399489	6	113194053	A	G	0.8202	0.0449	0.0077	5.96e-09	0.300549	-	-	-	-
Cbm_Vermis	rs28583562	7	19619504	A	G	0.6508	-	-	-	-	-0.0464	0.0075	7.99e-10	0.808516
Cbm_Vermis	rs4724229	7	43629746	T	C	0.3131	-0.0396	0.0066	1.56e-09	0.420011	-	-	-	-
Cbm_Vermis	rs2108321	7	74297551	A	T	0.2708	0.041	0.0071	7.08e-09	0.403827	-	-	-	-
Cbm_Vermis	rs35061193	7	100178177	T	C	0.4766	0.0389	0.006	8.74e-11	0.540819	-	-	-	-
Cbm_Vermis	rs17286505	7	103326246	C	G	0.4847	-	-	-	-	0.0401	0.0066	9.49e-10	0.609364
Cbm_Vermis	rs727708	7	103330944	T	C	0.4673	-0.0477	0.006	1.51e-15	0.91198	-	-	-	-
Cbm_Vermis	rs12705169	7	103576888	T	G	0.6436	-0.045	0.0063	7.47e-13	0.761155	-	-	-	-
Cbm_Vermis	rs34079891	7	114747340	A	T	0.1279	-0.0551	0.0089	6.64e-10	0.424211	-	-	-	-
Cbm_Vermis	rs145691400	7	127893116	T	C	0.0214	-	-	-	-	0.1248	0.0226	3.39e-08	0.386314
Cbm_Vermis	rs12534832	7	155242699	A	C	0.6154	0.0349	0.0062	1.58e-08	0.274843	-	-	-	-
Cbm_Vermis	rs1731845	7	155654006	T	C	0.6322	-0.0376	0.0062	1.01e-09	0.394074	-	-	-	-
Cbm_Vermis	rs10447502	7	156072251	T	C	0.2892	-0.0529	0.0066	6.59e-16	0.920157	-	-	-	-
Cbm_Vermis	rs4304216	7	156092669	A	T	0.4166	-	-	-	-	-0.0435	0.0066	4.71e-11	0.751711
Cbm_Vermis	rs79961526	7	156153478	A	G	0.0578	-	-	-	-	0.0839	0.014	2.08e-09	0.561461
Cbm_Vermis	rs4997807	7	156158672	T	C	0.397	-	-	-	-	0.0605	0.0066	5.39e-20	0.998713
Cbm_Vermis	rs11770722	7	156164692	T	G	0.9387	-0.0702	0.0124	1.55e-08	0.261713	-	-	-	-
Cbm_Vermis	rs36071136	7	156166303	C	G	0.5746	-0.0622	0.006	5.47e-25	0.999588	-	-	-	-
Cbm_Vermis	rs4716610	7	156243562	T	G	0.6211	0.038	0.0061	5.56e-10	0.42781	-	-	-	-
Cbm_Vermis	rs2280716	7	156253492	T	C	0.8031	-0.0488	0.0075	8.03e-11	0.538199	-	-	-	-
Cbm_Vermis	rs2695582	7	156371216	T	C	0.6892	-0.0432	0.0067	1.31e-10	0.604182	-	-	-	-
Cbm_Vermis	rs80171586	7	156590604	T	G	0.1613	0.0495	0.0081	9.95e-10	0.402407	-	-	-	-
Cbm_Vermis	rs3132880	8	101673916	T	C	0.46	0.0373	0.0062	2.02e-09	0.445376	-	-	-	-
Cbm_Vermis	rs10110223	8	120887566	A	G	0.5472	-0.0345	0.006	8.17e-09	0.293662	-	-	-	-
Cbm_Vermis	rs2597325	8	133449317	T	G	0.2186	-0.0496	0.0073	9.33e-12	0.658675	-	-	-	-
Cbm_Vermis	rs13268108	8	142039586	T	C	0.6092	0.0438	0.0062	1.56e-12	0.744826	-	-	-	-
Cbm_Vermis	rs1535840	9	2251704	A	G	0.6109	0.0388	0.0061	2.45e-10	0.482477	-	-	-	-
Cbm_Vermis	rs6476453	9	34559501	T	C	0.5614	0.0354	0.0061	5.2e-09	0.333489	-	-	-	-
Cbm_Vermis	rs3739756	9	98775235	T	C	0.9643	-0.0882	0.016	3.44e-08	0.219505	-	-	-	-
Cbm_Vermis	rs7027172	9	109571457	A	G	0.0227	-0.1361	0.02	1.12e-11	0.634428	-0.1365	0.0219	4.39e-10	0.640819
Cbm_Vermis	rs10759833	9	118930383	T	C	0.6153	-0.0393	0.0061	1.41e-10	0.505708	-	-	-	-
Cbm_Vermis	rs72754248	9	119061396	A	G	0.0706	0.0934	0.0116	8.7e-16	0.9176	0.0793	0.0127	4.35e-10	0.636047
Cbm_Vermis	rs34979631	9	119255297	T	C	0.2234	-	-	-	-	-0.0536	0.0078	5.39e-12	0.824176
Cbm_Vermis	rs78246677	9	119400827	A	G	0.6579	-	-	-	-	-0.0398	0.0069	8.32e-09	0.478017
Cbm_Vermis	rs10983311	9	119470373	A	T	0.2192	-0.0487	0.0072	1.28e-11	0.621001	-	-	-	-
Cbm_Vermis	rs77641763	9	140265782	T	C	0.123	-0.0677	0.009	7.31e-14	0.8174	-	-	-	-
Cbm_Vermis	rs10764393	10	23485953	A	G	0.53	-0.0327	0.006	4.39e-08	0.215786	-	-	-	-
Cbm_Vermis	rs786819	10	48648356	A	C	0.8843	-0.0515	0.0093	3.14e-08	0.228773	-	-	-	-
Cbm_Vermis	rs11598539	10	130842093	T	C	0.7481	-0.0413	0.0069	1.81e-09	0.371975	-	-	-	-
Cbm_Vermis	rs11597095	10	133752612	T	C	0.4892	-0.036	0.006	1.5e-09	0.379278	-	-	-	-
Cbm_Vermis	rs11604780	11	10468671	A	G	0.5317	-	-	-	-	0.0416	0.0066	2.7e-10	0.685426
Cbm_Vermis	rs1123680	12	78241285	A	G	0.7626	-	-	-	-	0.0469	0.0077	1.35e-09	0.599941
Cbm_Vermis	rs4301837	12	102336310	T	C	0.505	0.0349	0.006	6.16e-09	0.321418	0.0517	0.0066	3.52e-15	0.973801
Cbm_Vermis	rs11111278	12	102846020	A	G	0.7921	-0.0695	0.0074	3.73e-21	0.995528	-0.0678	0.008	3.32e-17	0.992197
Cbm_Vermis	rs703547	12	102943707	C	G	0.8419	0.0516	0.0082	3.82e-10	0.472073	-	-	-	-
Cbm_Vermis	rs10850435	12	110033270	C	G	0.5096	-	-	-	-	0.0365	0.0065	2.08e-08	0.406844
Cbm_Vermis	rs1716169	12	123716930	A	T	0.2015	0.0524	0.0074	1.53e-12	0.711375	-	-	-	-
Cbm_Vermis	rs10152004	14	56619187	A	G	0.9279	-0.0704	0.0116	1.11e-09	0.40271	-	-	-	-
Cbm_Vermis	rs76675841	14	57620783	T	C	0.8515	-0.0467	0.0084	3.27e-08	0.240471	-	-	-	-
Cbm_Vermis	rs12916224	15	88883737	A	G	0.3055	0.0355	0.0065	4.31e-08	0.218427	-	-	-	-
Cbm_Vermis	rs62065453	17	43573419	T	C	0.2213	-	-	-	-	-0.0507	0.0078	1.02e-10	0.713107
Cbm_Vermis	rs2435214	17	44068339	A	G	0.18	0.0432	0.0078	3.74e-08	0.239637	-	-	-	-
Cbm_Vermis	rs75010486	17	44103825	T	C	0.7829	-	-	-	-	0.0551	0.0079	3.19e-12	0.850804
Cbm_Vermis	rs12951057	17	44794558	C	G	0.8353	-	-	-	-	-0.0525	0.0089	3.57e-09	0.546894
Cbm_Vermis	rs17698176	17	44819595	T	G	0.7757	-0.0426	0.0072	3.68e-09	0.35489	-	-	-	-
Cbm_Vermis	rs9912530	17	44836302	T	C	0.2701	-	-	-	-	-0.0465	0.0073	2.37e-10	0.673476
Cbm_Vermis	rs2898194	21	34524978	T	C	0.369	0.0363	0.0062	3.95e-09	0.328299	-	-	-	-
Cbm_Vermis	rs1885359	22	28011067	A	G	0.301	-	-	-	-	-0.0391	0.0071	3.62e-08	0.371931
Cbm_Vermis	rs134016	22	28038356	A	G	0.8013	0.0437	0.0076	7.84e-09	0.320202	-	-	-	-
Cbm_Vermis	rs28680799	22	46397854	T	C	0.401	-	-	-	-	0.0376	0.0068	3.26e-08	0.42691
Cbm_Left_I_IV	rs34073408	1	21420603	A	T	0.5244	-	-	-	-	0.0441	0.0069	1.2e-10	0.800853
Cbm_Left_I_IV	rs2744699	1	22498170	T	C	0.0747	-	-	-	-	-0.0723	0.0124	5.33e-09	0.495565
Cbm_Left_I_IV	rs12072311	1	51572465	C	G	0.0532	0.0777	0.0136	1.03e-08	0.320317	-	-	-	-
Cbm_Left_I_IV	rs2779490	1	76014288	T	C	0.1509	-0.0711	0.0085	8.08e-17	0.966059	-	-	-	-
Cbm_Left_I_IV	rs190024	1	76024137	A	C	0.8056	-	-	-	-	0.0459	0.0083	3.05e-08	0.397365
Cbm_Left_I_IV	rs11264736	1	153939130	T	C	0.4728	-	-	-	-	-0.0467	0.007	2.97e-11	0.887765
Cbm_Left_I_IV	rs9803993	1	243672125	A	G	0.2198	0.0405	0.0074	4.26e-08	0.255418	-	-	-	-
Cbm_Left_I_IV	rs55795022	2	16386265	A	T	0.171	-0.0519	0.0092	1.66e-08	0.553526	-	-	-	-
Cbm_Left_I_IV	rs10196691	2	27141359	A	T	0.376	-	-	-	-	0.0405	0.0067	1.69e-09	0.56229
Cbm_Left_I_IV	rs7571971	2	88895351	T	C	0.2798	-	-	-	-	0.0513	0.0073	1.67e-12	0.871604
Cbm_Left_I_IV	rs2234675	2	223085955	T	G	0.0423	-0.1184	0.0151	4.43e-15	0.913422	-	-	-	-
Cbm_Left_I_IV	rs10196267	2	237630295	A	G	0.5803	-0.0469	0.0062	3.82e-14	0.878203	-	-	-	-
Cbm_Left_I_IV	rs115733015	3	139042962	A	T	0.008	-0.1945	0.0346	1.86e-08	0.308996	-	-	-	-
Cbm_Left_I_IV	rs12511373	4	102666785	T	C	0.0966	-	-	-	-	0.0736	0.0112	5.89e-11	0.775986
Cbm_Left_I_IV	rs13107325	4	103188709	T	C	0.0713	-	-	-	-	0.1881	0.0127	2.84e-49	1
Cbm_Left_I_IV	rs13135092	4	103198082	A	G	0.9214	-0.0672	0.0114	3.25e-09	0.38896	-	-	-	-
Cbm_Left_I_IV	rs6822371	4	103233207	A	C	0.3428	-	-	-	-	0.0533	0.0069	1.33e-14	0.962405
Cbm_Left_I_IV	rs62329462	4	103264105	T	C	0.1132	-	-	-	-	-0.0561	0.0103	4.94e-08	0.356906
Cbm_Left_I_IV	rs13173232	5	89413053	T	C	0.3104	-0.0399	0.0066	1.31e-09	0.4307	-	-	-	-
Cbm_Left_I_IV	rs72798629	5	133829211	C	G	0.8067	0.0428	0.0079	4.95e-08	0.267476	-	-	-	-
Cbm_Left_I_IV	rs4711000	6	22099484	T	C	0.5504	0.0374	0.0061	1.05e-09	0.44702	0.0369	0.0066	2.03e-08	0.41896
Cbm_Left_I_IV	rs9398172	6	108994826	A	G	0.7102	-	-	-	-	0.0421	0.0072	4.08e-09	0.503098
Cbm_Left_I_IV	rs1228877	7	84017279	C	G	0.6393	-0.0368	0.0064	6.62e-09	0.344528	-	-	-	-
Cbm_Left_I_IV	rs10277279	7	84525520	A	G	0.2607	0.044	0.0069	2.29e-10	0.52809	-	-	-	-
Cbm_Left_I_IV	rs2734895	7	100190116	T	C	0.3241	-0.0396	0.0066	2.3e-09	0.43906	-	-	-	-
Cbm_Left_I_IV	rs144496980	7	100523009	A	G	0.4447	-0.0347	0.0063	3.25e-08	0.300651	-	-	-	-
Cbm_Left_I_IV	rs2908004	7	120969769	A	G	0.4468	-	-	-	-	-0.0436	0.0065	2.66e-11	0.772351
Cbm_Left_I_IV	rs4304216	7	156092669	A	T	0.4166	-0.0474	0.0062	1.83e-14	0.890594	-	-	-	-
Cbm_Left_I_IV	rs35137250	7	156161066	T	C	0.4673	0.0417	0.0062	2.31e-11	0.690179	-	-	-	-
Cbm_Left_I_IV	rs452787	8	26438614	A	C	0.4545	-0.0335	0.0061	4.66e-08	0.247126	-	-	-	-
Cbm_Left_I_IV	rs13268108	8	142039586	T	C	0.6092	0.0428	0.0063	1.39e-11	0.698009	-	-	-	-
Cbm_Left_I_IV	rs72754248	9	119061396	A	G	0.0706	0.0861	0.0119	4.4e-13	0.803428	-	-	-	-
Cbm_Left_I_IV	rs11507683	9	140262424	T	C	0.1227	-0.0872	0.0093	4.23e-21	0.996839	-0.0745	0.0099	5.7e-14	0.938794
Cbm_Left_I_IV	rs9421819	10	48482576	C	G	0.7942	0.0476	0.0075	2.8e-10	0.519801	-	-	-	-
Cbm_Left_I_IV	rs1056740	10	104236552	T	C	0.3534	-0.0368	0.0064	8.59e-09	0.336125	-	-	-	-
Cbm_Left_I_IV	rs10829556	10	130842249	A	G	0.7404	0.0415	0.0071	5.96e-09	0.401053	-	-	-	-
Cbm_Left_I_IV	rs6484290	11	10470852	A	G	0.5338	-	-	-	-	0.0387	0.0066	4.21e-09	0.526868
Cbm_Left_I_IV	rs2105505	11	58944104	A	G	0.2885	-0.0394	0.0067	4.79e-09	0.363596	-	-	-	-
Cbm_Left_I_IV	rs9669157	12	69810930	A	T	0.8708	-	-	-	-	0.0583	0.0106	4.04e-08	0.552947
Cbm_Left_I_IV	rs11111090	12	102326461	A	C	0.5205	0.0415	0.0061	1.14e-11	0.682794	0.0416	0.0065	2.05e-10	0.687869
Cbm_Left_I_IV	rs76197610	12	102338012	T	C	0.918	-0.0669	0.0112	2.21e-09	0.418928	-	-	-	-
Cbm_Left_I_IV	rs7971939	12	102407432	A	T	0.7801	-	-	-	-	-0.0606	0.0079	1.61e-14	0.957866
Cbm_Left_I_IV	rs144782470	12	102524505	T	C	0.0392	-0.1001	0.0157	1.89e-10	0.540566	-	-	-	-
Cbm_Left_I_IV	rs1533688	12	102772745	T	C	0.2247	0.0441	0.0073	1.46e-09	0.42471	-	-	-	-
Cbm_Left_I_IV	rs11111278	12	102846020	A	G	0.7921	-0.0711	0.0075	3.97e-21	0.997446	-	-	-	-
Cbm_Left_I_IV	rs12146713	12	106476805	T	C	0.9044	0.0575	0.0103	2.55e-08	0.268068	-	-	-	-
Cbm_Left_I_IV	rs28569885	12	123897177	A	G	0.2038	-	-	-	-	0.0464	0.0081	8.89e-09	0.45717
Cbm_Left_I_IV	rs9587187	13	107380937	A	C	0.8931	0.0792	0.0099	1.27e-15	0.938902	0.063	0.0106	2.98e-09	0.545067
Cbm_Left_I_IV	rs72681869	14	50655357	C	G	0.0108	-	-	-	-	0.1813	0.0316	9.74e-09	0.462265
Cbm_Left_I_IV	rs36132266	14	69266023	T	G	0.4339	-0.0488	0.0061	1.92e-15	0.928375	-0.0404	0.0066	8.41e-10	0.607297
Cbm_Left_I_IV	rs6497753	16	24710690	T	C	0.6962	0.0375	0.0066	1.65e-08	0.300909	-	-	-	-
Cbm_Left_I_IV	rs9909009	17	19906503	A	G	0.5041	0.0385	0.0061	3.46e-10	0.520415	-	-	-	-
Cbm_Left_I_IV	rs78777685	17	35257232	A	G	0.2179	0.0561	0.0076	1.3e-13	0.878985	0.0554	0.0081	8.24e-12	0.86177
Cbm_Left_I_IV	rs9905515	17	35261073	C	G	0.223	-0.054	0.0074	2.09e-13	0.835212	-	-	-	-
Cbm_Left_I_IV	rs1529904	18	73077398	C	G	0.2197	0.0461	0.0073	2.88e-10	0.501941	-	-	-	-
Cbm_Left_I_IV	rs66500423	19	41195170	T	C	0.6878	0.0434	0.0066	5.15e-11	0.617051	-	-	-	-
Cbm_Left_I_IV	rs7067067	X	19539381	A	T	0.8509	-	-	-	-	-0.0441	0.0076	6.93e-09	0.168409
Cbm_Left_I_IV	rs34380139	X	19544526	A	T	0.8476	-0.0489	0.007	3.5e-12	0.334428	-	-	-	-
Cbm_Right_I_IV	rs34073408	1	21420603	A	T	0.5244	-	-	-	-	0.0374	0.0069	4.71e-08	0.455158
Cbm_Right_I_IV	rs2807369	1	22498451	A	G	0.0744	-	-	-	-	-0.0687	0.0124	3.08e-08	0.385253
Cbm_Right_I_IV	rs6658111	1	47980916	T	G	0.6352	-	-	-	-	0.0399	0.0068	4.69e-09	0.516204
Cbm_Right_I_IV	rs114492975	1	51712970	T	C	0.0485	0.0836	0.0142	3.76e-09	0.375276	-	-	-	-
Cbm_Right_I_IV	rs211776	1	75995505	A	T	0.8081	-	-	-	-	0.0481	0.0084	9.81e-09	0.48401
Cbm_Right_I_IV	rs61653323	1	76024919	T	C	0.1509	-0.0701	0.0086	2.51e-16	0.957584	-	-	-	-
Cbm_Right_I_IV	rs10908512	1	153856498	T	C	0.5652	-	-	-	-	0.0396	0.0066	1.75e-09	0.5637
Cbm_Right_I_IV	rs35758221	2	60792671	A	C	0.3616	-0.0411	0.0066	3.84e-10	0.576747	-	-	-	-
Cbm_Right_I_IV	rs34258317	2	88924854	T	C	0.2788	-	-	-	-	0.0474	0.0073	7.63e-11	0.734856
Cbm_Right_I_IV	rs2234675	2	223085955	T	G	0.0423	-0.1154	0.0151	2.47e-14	0.882841	-	-	-	-
Cbm_Right_I_IV	rs360702	3	138703773	A	G	0.775	0.0446	0.0073	1.2e-09	0.449217	-	-	-	-
Cbm_Right_I_IV	rs17315501	3	139029676	A	G	0.0164	-0.1395	0.0242	8.27e-09	0.349399	-	-	-	-
Cbm_Right_I_IV	rs1318947	4	4761862	A	G	0.6797	0.0383	0.0066	5.83e-09	0.365714	-	-	-	-
Cbm_Right_I_IV	rs13107325	4	103188709	T	C	0.0713	-	-	-	-	0.1413	0.0128	1.82e-28	1
Cbm_Right_I_IV	rs13135092	4	103198082	A	G	0.9214	-0.0692	0.0114	1.24e-09	0.449044	-	-	-	-
Cbm_Right_I_IV	rs6822371	4	103233207	A	C	0.3428	-	-	-	-	0.0451	0.0069	7.01e-11	0.747091
Cbm_Right_I_IV	rs4711000	6	22099484	T	C	0.5504	0.041	0.0061	2.38e-11	0.647699	-	-	-	-
Cbm_Right_I_IV	rs13191889	6	35013209	A	G	0.4116	0.0342	0.0062	3.42e-08	0.260882	-	-	-	-
Cbm_Right_I_IV	rs201168005	6	98584713	A	T	0.4886	-0.0341	0.0061	2.83e-08	0.281242	-	-	-	-
Cbm_Right_I_IV	rs1057523	7	43670323	A	G	0.3663	-0.0364	0.0063	7.94e-09	0.330501	-	-	-	-
Cbm_Right_I_IV	rs12718889	7	50842697	A	C	0.6954	0.0382	0.0069	3.23e-08	0.335056	-	-	-	-
Cbm_Right_I_IV	rs2908004	7	120969769	A	G	0.4468	-	-	-	-	-0.0417	0.0065	1.92e-10	0.683018
Cbm_Right_I_IV	rs7778054	7	156095814	T	C	0.4744	0.0425	0.0061	4.51e-12	0.730923	-	-	-	-
Cbm_Right_I_IV	rs57131976	7	156167072	A	C	0.4252	0.041	0.0062	3.61e-11	0.634196	-	-	-	-
Cbm_Right_I_IV	rs2581550	8	122259608	A	G	0.608	0.0374	0.0068	3.55e-08	0.408183	-	-	-	-
Cbm_Right_I_IV	rs1981224	9	16880465	A	G	0.1507	-	-	-	-	0.0535	0.0097	4.1e-08	0.508535
Cbm_Right_I_IV	rs1861881	9	119312256	T	G	0.313	-0.0379	0.0066	8.6e-09	0.334399	-	-	-	-
Cbm_Right_I_IV	rs28458909	9	140257189	T	C	0.1231	-0.0751	0.0093	5.35e-16	0.9456	-	-	-	-
Cbm_Right_I_IV	rs11507683	9	140262424	T	C	0.1228	-	-	-	-	-0.0623	0.0099	3.3e-10	0.656196
Cbm_Right_I_IV	rs1056740	10	104236552	T	C	0.3534	-0.0354	0.0064	3.36e-08	0.269454	-	-	-	-
Cbm_Right_I_IV	rs10829556	10	130842249	A	G	0.7404	0.0499	0.0072	2.92e-12	0.789004	-	-	-	-
Cbm_Right_I_IV	rs10840422	11	10491741	A	T	0.5541	-	-	-	-	0.0434	0.0066	5.45e-11	0.762929
Cbm_Right_I_IV	rs693960	11	58941450	A	C	0.492	-0.0358	0.0061	5.08e-09	0.368649	-	-	-	-
Cbm_Right_I_IV	rs174600	11	61622227	T	C	0.6712	-0.0379	0.0065	6e-09	0.358647	-	-	-	-
Cbm_Right_I_IV	rs72931639	11	78036703	T	C	0.1574	-	-	-	-	0.0497	0.009	3.03e-08	0.390115
Cbm_Right_I_IV	rs4301837	12	102336310	T	C	0.505	0.0424	0.0062	6.13e-12	0.728728	0.0384	0.0066	6.03e-09	0.514692
Cbm_Right_I_IV	rs7971939	12	102407432	A	T	0.7802	-0.0691	0.0074	8.26e-21	0.996853	-0.0631	0.0079	1.31e-15	0.978271
Cbm_Right_I_IV	rs78360407	12	102751205	A	C	0.0448	-0.0999	0.0147	1.15e-11	0.675956	-	-	-	-
Cbm_Right_I_IV	rs1533688	12	102772745	T	C	0.2247	0.0407	0.0073	2.56e-08	0.275672	-	-	-	-
Cbm_Right_I_IV	rs17797222	12	102913946	A	G	0.7731	-0.0581	0.0073	2.25e-15	0.933988	-	-	-	-
Cbm_Right_I_IV	rs11111293	12	102921296	T	C	0.7773	-	-	-	-	-0.0456	0.0078	6.02e-09	0.487763
Cbm_Right_I_IV	rs61941037	12	102989173	T	C	0.9613	0.0899	0.0159	1.55e-08	0.310301	-	-	-	-
Cbm_Right_I_IV	rs144065445	12	103024188	A	G	0.9897	-0.1663	0.0303	3.88e-08	0.257164	-	-	-	-
Cbm_Right_I_IV	rs9587185	13	107375338	A	C	0.1082	-	-	-	-	-0.0632	0.0105	1.96e-09	0.562021
Cbm_Right_I_IV	rs9301159	13	107377936	A	C	0.8876	0.0879	0.0097	1.07e-19	0.993582	-	-	-	-
Cbm_Right_I_IV	rs36132266	14	69266023	T	G	0.4339	-0.0463	0.0062	5.24e-14	0.866318	-0.0369	0.0066	2.23e-08	0.411189
Cbm_Right_I_IV	rs2279295	15	61057225	A	G	0.5461	0.0345	0.0062	2.13e-08	0.294012	-	-	-	-
Cbm_Right_I_IV	rs4887909	16	77533772	T	C	0.3778	0.0367	0.0064	1.02e-08	0.357469	-	-	-	-
Cbm_Right_I_IV	rs78777685	17	35257232	A	G	0.2179	0.0562	0.0076	1.27e-13	0.881346	0.0507	0.0081	4.17e-10	0.702637
Cbm_Right_I_IV	rs9905515	17	35261073	C	G	0.223	-0.0445	0.0074	1.63e-09	0.437844	-	-	-	-
Cbm_Right_I_IV	rs10422762	19	36157167	A	G	0.4738	-	-	-	-	-0.0378	0.0065	6.52e-09	0.477604
Cbm_Right_I_IV	rs66500423	19	41195170	T	C	0.6878	0.0514	0.0066	8.17e-15	0.912861	-	-	-	-
Cbm_Right_I_IV	rs882158	22	27834335	A	G	0.5865	-0.0375	0.0068	3.61e-08	0.431515	-	-	-	-
Cbm_Right_I_IV	rs58542439	X	19544854	T	C	0.153	0.0467	0.007	3.24e-11	0.2591	-	-	-	-
Cbm_Right_I_IV	rs41304739	X	19554649	T	C	0.128	-	-	-	-	0.0495	0.0081	1.08e-09	0.234871
Cbm_Right_I_IV	rs7049476	X	20186509	T	G	0.7632	-0.0362	0.0063	1.05e-08	0.146215	-	-	-	-
Cbm_Left_V	rs2744722	1	22487062	T	C	0.0678	-	-	-	-	-0.0772	0.0127	1.39e-09	0.541511
Cbm_Left_V	rs6676515	1	50861987	A	G	0.4934	-0.0394	0.0062	2.24e-10	0.571276	-	-	-	-
Cbm_Left_V	rs75117559	1	50882506	T	C	0.9503	-0.0783	0.0143	4.64e-08	0.278445	-	-	-	-
Cbm_Left_V	rs6695869	1	51413205	A	G	0.4251	0.0381	0.0063	1.63e-09	0.473163	-	-	-	-
Cbm_Left_V	rs12091097	1	51659401	A	C	0.9425	-0.1016	0.0133	2.57e-14	0.90507	-	-	-	-
Cbm_Left_V	rs211747	1	76004141	T	C	0.8061	-	-	-	-	0.0515	0.0081	2.62e-10	0.642699
Cbm_Left_V	rs2748444	1	76010959	T	C	0.8492	0.0684	0.0087	4.89e-15	0.939092	-	-	-	-
Cbm_Left_V	rs61803655	1	153769332	A	G	0.5124	-	-	-	-	0.0357	0.0064	2.58e-08	0.362935
Cbm_Left_V	rs6426900	1	165129264	T	C	0.7108	0.0398	0.007	1.16e-08	0.38464	-	-	-	-
Cbm_Left_V	rs6691412	1	165283995	A	G	0.8021	0.0537	0.008	1.88e-11	0.746994	-	-	-	-
Cbm_Left_V	rs17749164	1	231897207	T	C	0.5981	-0.0367	0.0064	8.65e-09	0.379011	-	-	-	-
Cbm_Left_V	rs7571971	2	88895351	T	C	0.2798	-	-	-	-	0.0505	0.0071	1.47e-12	0.849274
Cbm_Left_V	rs1429984	2	137668054	C	G	0.5992	0.0368	0.0064	7.38e-09	0.383468	-	-	-	-
Cbm_Left_V	rs2234675	2	223085955	T	G	0.0423	-0.1092	0.0154	1.56e-12	0.797346	-	-	-	-
Cbm_Left_V	rs7556982	2	237644199	A	G	0.5793	-0.0446	0.0063	1.49e-12	0.800462	-	-	-	-
Cbm_Left_V	rs11715177	3	48763894	A	G	0.1219	-0.0542	0.0096	1.59e-08	0.350989	-	-	-	-
Cbm_Left_V	rs9826158	3	89257419	T	C	0.7152	0.0497	0.007	9.19e-13	0.831826	-	-	-	-
Cbm_Left_V	rs11099497	4	82644654	T	C	0.3714	-0.0389	0.0069	1.92e-08	0.468681	-	-	-	-
Cbm_Left_V	rs13107325	4	103188709	T	C	0.0713	-	-	-	-	0.1461	0.0125	2.08e-31	1
Cbm_Left_V	rs6822371	4	103233207	A	C	0.3428	-	-	-	-	0.0431	0.0068	2.19e-10	0.653166
Cbm_Left_V	rs13172689	5	53463520	A	G	0.8132	0.0444	0.008	3.35e-08	0.306788	-	-	-	-
Cbm_Left_V	rs13173232	5	89413053	T	C	0.3104	-0.0551	0.0067	2.66e-16	0.966957	-0.0449	0.0069	8.65e-11	0.686751
Cbm_Left_V	rs6556373	5	158359476	A	C	0.5104	-0.0349	0.0062	1.95e-08	0.321121	-	-	-	-
Cbm_Left_V	rs11134870	5	174141432	T	C	0.2135	0.0425	0.0078	4.47e-08	0.317986	-	-	-	-
Cbm_Left_V	rs144861591	6	26072992	T	C	0.0744	-	-	-	-	-0.0679	0.0123	3.09e-08	0.360124
Cbm_Left_V	rs10485165	6	89112817	T	C	0.1494	-0.0501	0.0087	9.18e-09	0.364563	-	-	-	-
Cbm_Left_V	rs201168005	6	98584713	A	T	0.4886	-	-	-	-	-0.0353	0.0064	4.12e-08	0.341794
Cbm_Left_V	rs573594	6	100132256	A	G	0.8041	0.0432	0.0078	3.38e-08	0.290985	-	-	-	-
Cbm_Left_V	rs9493178	6	132441061	A	T	0.8585	0.0526	0.009	6e-09	0.416474	-	-	-	-
Cbm_Left_V	rs142133424	6	132490260	A	G	0.0116	-0.1655	0.0293	1.67e-08	0.349779	-	-	-	-
Cbm_Left_V	rs7805955	7	11517232	T	C	0.6555	0.04	0.0068	4.16e-09	0.492903	-	-	-	-
Cbm_Left_V	rs1019000	7	50809771	T	C	0.273	-0.0393	0.007	1.86e-08	0.327493	-	-	-	-
Cbm_Left_V	rs1892747	7	72126268	C	G	0.9425	-	-	-	-	0.0795	0.0146	4.88e-08	0.43431
Cbm_Left_V	rs3094908	7	84150868	T	C	0.218	0.0457	0.0076	1.59e-09	0.477025	-	-	-	-
Cbm_Left_V	rs13233398	7	103672960	T	C	0.4907	-	-	-	-	-0.0378	0.0065	7.76e-09	0.48019
Cbm_Left_V	rs2908004	7	120969769	A	G	0.4468	-	-	-	-	-0.0368	0.0064	9.83e-09	0.412602
Cbm_Left_V	rs4304216	7	156092669	A	T	0.4166	-0.0348	0.0063	4.02e-08	0.292016	-	-	-	-
Cbm_Left_V	rs7350040	7	156170722	A	C	0.5793	-0.0484	0.0064	3.39e-14	0.916233	-	-	-	-
Cbm_Left_V	rs7799972	7	156370803	A	G	0.2083	-0.0473	0.0079	2.49e-09	0.515721	-	-	-	-
Cbm_Left_V	rs35990411	8	8417561	C	G	0.5149	-0.0382	0.0063	1.03e-09	0.502411	-	-	-	-
Cbm_Left_V	rs6984592	8	142040038	A	G	0.5806	0.0396	0.0063	3.77e-10	0.553553	-	-	-	-
Cbm_Left_V	rs28458909	9	140257189	T	C	0.1231	-0.082	0.0095	4.13e-18	0.987861	-	-	-	-
Cbm_Left_V	rs77641763	9	140265782	T	C	0.1231	-	-	-	-	-0.0549	0.0097	1.6e-08	0.387264
Cbm_Left_V	rs10788706	10	48480371	A	G	0.8097	-0.047	0.0081	6.32e-09	0.429492	-	-	-	-
Cbm_Left_V	rs9421819	10	48482576	C	G	0.7942	0.0891	0.0077	6.61e-31	0.999999	-	-	-	-
Cbm_Left_V	rs72794236	10	48489065	A	G	0.0113	-0.1701	0.0294	7.67e-09	0.377497	-	-	-	-
Cbm_Left_V	rs116941231	10	48519437	A	G	0.9832	0.1411	0.0244	6.93e-09	0.394449	-	-	-	-
Cbm_Left_V	rs72792209	10	48642348	A	G	0.0877	-0.1095	0.011	2.86e-23	0.999672	-	-	-	-
Cbm_Left_V	rs786819	10	48648356	A	C	0.8843	0.0653	0.0097	2.09e-11	0.698387	-	-	-	-
Cbm_Left_V	rs2071020	11	10478228	T	C	0.4557	-	-	-	-	-0.0442	0.0065	8.2e-12	0.800057
Cbm_Left_V	rs7121247	11	59033164	A	G	0.6198	0.036	0.0065	2.45e-08	0.324145	-	-	-	-
Cbm_Left_V	rs174555	11	61579760	T	C	0.6896	-0.039	0.0067	6.19e-09	0.384495	-	-	-	-
Cbm_Left_V	rs12790178	11	92234612	A	G	0.9645	-0.0919	0.0168	4.55e-08	0.277357	-	-	-	-
Cbm_Left_V	rs711110	12	77991049	C	G	0.3454	-0.0362	0.0066	3.88e-08	0.297621	-	-	-	-
Cbm_Left_V	rs187441419	12	102532378	C	G	0.0072	-0.2367	0.0369	1.36e-10	0.606203	-	-	-	-
Cbm_Left_V	rs11111278	12	102846020	A	G	0.7922	-	-	-	-	-0.0575	0.0079	4e-13	0.888074
Cbm_Left_V	rs17882461	12	102863979	A	T	0.7776	-0.0628	0.0075	6.56e-17	0.978119	-	-	-	-
Cbm_Left_V	rs142193415	12	102900770	A	G	0.0089	-0.1981	0.0332	2.37e-09	0.447089	-	-	-	-
Cbm_Left_V	rs1626703	12	123710835	A	C	0.2542	-	-	-	-	0.0452	0.0078	7.83e-09	0.568997
Cbm_Left_V	rs76350445	14	57623935	T	C	0.0679	-	-	-	-	-0.0884	0.0128	4.23e-12	0.818846
Cbm_Left_V	rs36132266	14	69266023	T	G	0.4339	-0.0588	0.0063	8.09e-21	0.998031	-0.0373	0.0065	8.04e-09	0.433374
Cbm_Left_V	rs75034181	17	9119878	A	G	0.9944	0.3804	0.042	1.41e-19	0.99617	-	-	-	-
Cbm_Left_V	rs117971919	17	9144411	A	G	0.0477	-0.1204	0.0147	2.97e-16	0.970359	-	-	-	-
Cbm_Left_V	rs78154346	17	28169493	T	C	0.4535	-0.0374	0.0064	6.22e-09	0.448626	-	-	-	-
Cbm_Left_V	rs7216062	17	35248914	T	C	0.0258	-0.1271	0.0196	9.52e-11	0.621306	-	-	-	-
Cbm_Left_V	rs78777685	17	35257232	A	G	0.2179	0.0853	0.0077	3.31e-28	0.999998	-	-	-	-
Cbm_Left_V	rs8064679	17	35259093	T	G	0.2218	-0.099	0.0075	1.07e-39	1	-	-	-	-
Cbm_Left_V	rs173655	19	8914810	A	T	0.1433	-0.05	0.0092	4.93e-08	0.328603	-	-	-	-
Cbm_Left_V	rs2561558	19	41164384	A	T	0.3731	0.046	0.0065	1.55e-12	0.818285	-	-	-	-
Cbm_Left_V	rs57837628	19	41357910	A	G	0.4817	0.0348	0.0062	2.19e-08	0.315215	-	-	-	-
Cbm_Left_V	rs7067067	X	19539381	A	T	0.8509	-	-	-	-	-0.0415	0.0075	2.74e-08	0.11022
Cbm_Right_V	rs2488989	1	934121	A	G	0.2294	0.0436	0.0074	3.52e-09	0.416303	-	-	-	-
Cbm_Right_V	rs12087103	1	8057447	A	G	0.4061	0.0343	0.0062	3.75e-08	0.262206	-	-	-	-
Cbm_Right_V	rs3134614	1	40363054	C	G	0.8729	0.0539	0.0092	5.15e-09	0.374659	-	-	-	-
Cbm_Right_V	rs57401684	1	51571884	A	T	0.0742	-	-	-	-	0.071	0.0121	4.69e-09	0.446174
Cbm_Right_V	rs115574950	1	51654504	A	C	0.0521	0.0904	0.0138	5.19e-11	0.61468	-	-	-	-
Cbm_Right_V	rs449394	1	76011382	A	C	0.8055	-	-	-	-	0.0528	0.0081	5.41e-11	0.697943
Cbm_Right_V	rs2779490	1	76014288	T	C	0.1509	-0.0691	0.0086	9.06e-16	0.947474	-	-	-	-
Cbm_Right_V	rs7522030	1	153854036	T	C	0.5149	-	-	-	-	0.0365	0.0064	8.98e-09	0.406345
Cbm_Right_V	rs13374068	1	165317255	T	C	0.8196	0.0496	0.0081	7.63e-10	0.500208	-	-	-	-
Cbm_Right_V	rs4951347	1	204245347	T	C	0.6227	-0.0386	0.0064	1.22e-09	0.458928	-	-	-	-
Cbm_Right_V	rs6748658	2	16145517	A	G	0.431	-0.0353	0.0062	1.24e-08	0.324705	-	-	-	-
Cbm_Right_V	rs55795022	2	16386265	A	T	0.171	-0.0528	0.0093	1.19e-08	0.591543	-	-	-	-
Cbm_Right_V	rs11680549	2	88926348	C	G	0.2797	-	-	-	-	0.0456	0.0071	1.11e-10	0.6565
Cbm_Right_V	rs72971007	2	222713533	A	G	0.2214	-0.0445	0.0074	1.72e-09	0.432486	-	-	-	-
Cbm_Right_V	rs2234675	2	223085955	T	G	0.0423	-0.1055	0.0152	3.95e-12	0.732069	-	-	-	-
Cbm_Right_V	rs2217466	2	223104287	C	G	0.3852	-0.0434	0.0063	6.98e-12	0.721219	-	-	-	-
Cbm_Right_V	rs1430663	2	223121674	T	C	0.8766	0.0513	0.0093	3.79e-08	0.264775	-	-	-	-
Cbm_Right_V	rs11692233	2	239478248	T	C	0.158	0.0535	0.0086	5.34e-10	0.550451	-	-	-	-
Cbm_Right_V	rs73080361	3	48832146	A	G	0.0935	-	-	-	-	-0.0604	0.0109	3.38e-08	0.336277
Cbm_Right_V	rs74926817	3	49378833	C	G	0.8345	-	-	-	-	0.0533	0.0086	6.9e-10	0.583019
Cbm_Right_V	rs73080977	3	50189531	T	G	0.0867	-	-	-	-	-0.0706	0.0113	4.15e-10	0.59238
Cbm_Right_V	rs17026797	3	89286083	T	G	0.1732	-0.0462	0.0081	1.14e-08	0.324898	-	-	-	-
Cbm_Right_V	rs9874039	3	147175188	T	C	0.0795	-	-	-	-	-0.0678	0.0117	7.84e-09	0.420904
Cbm_Right_V	rs62306207	4	56250715	A	C	0.7501	-	-	-	-	0.0452	0.0073	6.91e-10	0.55766
Cbm_Right_V	rs4699304	4	98064535	T	C	0.6636	0.0407	0.0065	3.92e-10	0.518191	-	-	-	-
Cbm_Right_V	rs13135092	4	103198082	A	G	0.9214	-	-	-	-	-0.1203	0.0119	3.72e-24	0.999924
Cbm_Right_V	rs13173232	5	89413053	T	C	0.3104	-	-	-	-	-0.0404	0.0069	3.76e-09	0.456642
Cbm_Right_V	rs2920507	5	89419677	A	C	0.3102	-0.0437	0.0066	4.42e-11	0.628287	-	-	-	-
Cbm_Right_V	rs11745131	5	99798167	C	G	0.2248	-0.0409	0.0073	2.56e-08	0.283965	-	-	-	-
Cbm_Right_V	rs201168005	6	98584713	A	T	0.4886	-0.0467	0.0062	3.68e-14	0.8893	-0.0414	0.0064	8.39e-11	0.678927
Cbm_Right_V	rs9375649	6	99238571	A	G	0.3274	-0.0363	0.0065	2.68e-08	0.280156	-	-	-	-
Cbm_Right_V	rs3800228	6	108996748	T	G	0.2876	-0.037	0.0068	4.36e-08	0.253246	-	-	-	-
Cbm_Right_V	rs9493178	6	132441061	A	T	0.8585	0.0566	0.0089	1.94e-10	0.574517	-	-	-	-
Cbm_Right_V	rs10232580	7	43637228	T	C	0.7044	0.0368	0.0067	3.61e-08	0.257332	-	-	-	-
Cbm_Right_V	rs2040757	7	83879302	A	G	0.0802	-0.0659	0.0113	4.8e-09	0.368746	-	-	-	-
Cbm_Right_V	rs6973058	7	103850321	T	C	0.5333	-	-	-	-	0.0361	0.0063	1.28e-08	0.380842
Cbm_Right_V	rs156973	7	132199628	T	C	0.6671	0.0429	0.0065	4.25e-11	0.628517	-	-	-	-
Cbm_Right_V	rs4304216	7	156092669	A	T	0.4166	-0.0422	0.0062	1.31e-11	0.690083	-	-	-	-
Cbm_Right_V	rs10254949	7	156180672	T	C	0.1741	0.0515	0.0081	1.94e-10	0.55214	-	-	-	-
Cbm_Right_V	rs2695582	7	156371216	T	C	0.6892	-0.0425	0.0069	8e-10	0.568085	-	-	-	-
Cbm_Right_V	rs12679204	8	8414146	T	G	0.5629	-0.0408	0.0062	4.67e-11	0.630815	-	-	-	-
Cbm_Right_V	rs1868276	8	142033034	T	C	0.3942	-0.0464	0.0063	2.37e-13	0.848792	-	-	-	-
Cbm_Right_V	rs12237933	9	118462403	A	T	0.9039	0.0571	0.0104	4.08e-08	0.26073	-	-	-	-
Cbm_Right_V	rs28458909	9	140257189	T	C	0.1231	-	-	-	-	-0.0545	0.0096	1.44e-08	0.373601
Cbm_Right_V	rs28780988	9	140258412	A	C	0.1228	-0.059	0.0093	2.31e-10	0.533496	-	-	-	-
Cbm_Right_V	rs9421745	10	48485194	A	G	0.1933	-0.1001	0.0078	6.75e-38	1	-0.0519	0.0081	1.2e-10	0.657311
Cbm_Right_V	rs4075853	10	48485771	A	G	0.1186	0.0569	0.0095	1.91e-09	0.4236	-	-	-	-
Cbm_Right_V	rs116941231	10	48519437	A	G	0.9832	0.1749	0.024	3e-13	0.835244	-	-	-	-
Cbm_Right_V	rs1610026	10	48635138	C	G	0.0872	-0.1077	0.0109	4.09e-23	0.999401	-	-	-	-
Cbm_Right_V	rs9422354	10	48640536	T	C	0.0876	-	-	-	-	-0.0639	0.0112	1.2e-08	0.389929
Cbm_Right_V	rs786819	10	48648356	A	C	0.8843	0.0626	0.0096	6.76e-11	0.607448	-	-	-	-
Cbm_Right_V	rs148457253	10	49333397	A	G	0.9896	0.1747	0.0306	1.1e-08	0.349978	-	-	-	-
Cbm_Right_V	rs7078507	10	77140864	A	G	0.3901	0.035	0.0063	2.78e-08	0.283801	-	-	-	-
Cbm_Right_V	rs1897191	10	77143467	A	G	0.3822	-	-	-	-	0.0359	0.0066	4.58e-08	0.320877
Cbm_Right_V	rs6484290	11	10470852	A	G	0.5338	-	-	-	-	0.0452	0.0064	1.54e-12	0.840093
Cbm_Right_V	rs693960	11	58941450	A	C	0.492	-0.0378	0.0062	8.34e-10	0.480287	-	-	-	-
Cbm_Right_V	rs174555	11	61579760	T	C	0.6896	-0.0365	0.0066	3.41e-08	0.266147	-	-	-	-
Cbm_Right_V	rs4760663	12	49368633	A	G	0.3829	0.0371	0.0065	9.2e-09	0.383453	-	-	-	-
Cbm_Right_V	rs4301837	12	102336310	T	C	0.505	0.041	0.0062	3.5e-11	0.658619	-	-	-	-
Cbm_Right_V	rs187441419	12	102532378	C	G	0.0072	-0.2446	0.0363	1.55e-11	0.677433	-	-	-	-
Cbm_Right_V	rs7484309	12	102779478	T	C	0.2904	0.0387	0.0068	9.61e-09	0.333667	-	-	-	-
Cbm_Right_V	rs11111278	12	102846020	A	G	0.7921	-	-	-	-	-0.0608	0.0079	9.82e-15	0.945142
Cbm_Right_V	rs17882461	12	102863979	A	T	0.7776	-0.0609	0.0074	1.79e-16	0.963283	-	-	-	-
Cbm_Right_V	rs1626703	12	123710835	A	C	0.2542	-	-	-	-	0.0471	0.0077	1.23e-09	0.65927
Cbm_Right_V	rs4907484	13	113744370	T	C	0.0424	0.094	0.0152	6.41e-10	0.485237	-	-	-	-
Cbm_Right_V	rs117332043	14	57617154	T	C	0.0681	-0.0875	0.0122	7.3e-13	0.802458	-	-	-	-
Cbm_Right_V	rs76350445	14	57623935	T	C	0.0679	-	-	-	-	-0.0915	0.0126	4.12e-13	0.87167
Cbm_Right_V	rs36132266	14	69266023	T	G	0.4339	-0.0412	0.0062	2.69e-11	0.650204	-0.0397	0.0064	5.45e-10	0.568388
Cbm_Right_V	rs75034181	17	9119878	A	G	0.9944	0.3802	0.0414	3.76e-20	0.996121	-	-	-	-
Cbm_Right_V	rs117971919	17	9144411	A	G	0.0477	-0.1117	0.0145	1.31e-14	0.912334	-	-	-	-
Cbm_Right_V	rs78777685	17	35257232	A	G	0.2179	0.0513	0.0076	1.62e-11	0.726703	-	-	-	-
Cbm_Right_V	rs8064679	17	35259093	T	G	0.2218	-0.0596	0.0074	7.08e-16	0.948292	-	-	-	-
Cbm_Right_V	rs59384167	19	18444518	A	C	0.5508	0.0367	0.0062	3.67e-09	0.407793	-	-	-	-
Cbm_Right_V	rs66500423	19	41195170	T	C	0.6878	0.0457	0.0067	6.76e-12	0.72664	-	-	-	-
Cbm_Right_V	rs1406947	20	33969530	T	C	0.6166	-	-	-	-	-0.0358	0.0065	4.1e-08	0.317148
Cbm_Right_V	rs7059728	X	19537945	A	G	0.1504	-	-	-	-	0.0406	0.0074	3.56e-08	0.0964174
Cbm_Left_VI	rs309503	1	23231457	T	G	0.4449	0.0483	0.0067	4.49e-13	0.920941	-	-	-	-
Cbm_Left_VI	rs11211079	1	45569347	T	G	0.1642	-0.0496	0.0088	1.89e-08	0.421127	-	-	-	-
Cbm_Left_VI	rs11205817	1	51573963	A	T	0.0746	-	-	-	-	0.0686	0.0114	1.57e-09	0.382383
Cbm_Left_VI	rs17106409	1	51576197	T	C	0.9248	-0.0865	0.0124	3.23e-12	0.85777	-	-	-	-
Cbm_Left_VI	rs17192655	1	53699129	C	G	0.1342	0.0596	0.0096	4.92e-10	0.639175	-	-	-	-
Cbm_Left_VI	rs1288492	1	53771564	T	C	0.4649	-0.0414	0.0066	2.66e-10	0.674222	-	-	-	-
Cbm_Left_VI	rs1288476	1	53782500	A	G	0.647	0.0399	0.0072	2.74e-08	0.499764	-	-	-	-
Cbm_Left_VI	rs11265285	1	154174569	T	C	0.5513	-	-	-	-	-0.0333	0.006	2.92e-08	0.236499
Cbm_Left_VI	rs35075425	1	176787351	A	G	0.1812	-	-	-	-	-0.0439	0.0077	1.45e-08	0.267586
Cbm_Left_VI	rs6710393	2	200697246	A	G	0.8107	-	-	-	-	0.0417	0.0077	4.96e-08	0.217347
Cbm_Left_VI	rs6738181	2	205128021	A	G	0.2354	0.0437	0.0077	1.17e-08	0.439667	-	-	-	-
Cbm_Left_VI	rs1447497	2	205402370	T	C	0.7564	0.0474	0.0076	5.39e-10	0.642487	-	-	-	-
Cbm_Left_VI	rs73982712	2	206024697	T	C	0.0087	0.213	0.0352	1.4e-09	0.580512	-	-	-	-
Cbm_Left_VI	rs849227	2	206262570	A	G	0.1442	0.063	0.01	2.79e-10	0.809431	-	-	-	-
Cbm_Left_VI	rs6724376	2	206399128	A	G	0.3915	-0.0459	0.0067	8.53e-12	0.829847	-	-	-	-
Cbm_Left_VI	rs9832454	3	50217558	T	C	0.0899	-0.0728	0.0115	2.59e-10	0.692017	-	-	-	-
Cbm_Left_VI	rs1489100	3	76132564	T	C	0.5578	-0.0399	0.0066	1.46e-09	0.584481	-	-	-	-
Cbm_Left_VI	rs4689933	4	4761140	T	C	0.6802	-	-	-	-	0.0614	0.0065	1.72e-21	0.996919
Cbm_Left_VI	rs1318947	4	4761862	A	G	0.6798	0.0784	0.0071	1.07e-28	1	-	-	-	-
Cbm_Left_VI	rs2087864	4	4803437	T	C	0.2727	0.0424	0.0073	7.99e-09	0.478597	0.0376	0.0067	1.99e-08	0.25282
Cbm_Left_VI	rs6832405	4	4883736	T	G	0.3338	0.0394	0.007	2.28e-08	0.444202	-	-	-	-
Cbm_Left_VI	rs4859449	4	77457071	C	G	0.3624	-0.0459	0.0068	1.33e-11	0.804128	-	-	-	-
Cbm_Left_VI	rs11099497	4	82644654	T	C	0.3715	-0.0427	0.0073	4.01e-09	0.672566	-	-	-	-
Cbm_Left_VI	rs1946567	4	91067333	T	C	0.8445	-0.0603	0.009	2.37e-11	0.786901	-	-	-	-
Cbm_Left_VI	rs28437329	4	98133391	T	G	0.6692	0.0411	0.007	3.99e-09	0.530465	-	-	-	-
Cbm_Left_VI	rs13107325	4	103188709	T	C	0.0713	-	-	-	-	0.1385	0.0117	1.68e-32	0.999999
Cbm_Left_VI	rs11936470	4	125380922	A	G	0.4858	0.0484	0.0066	2.1e-13	0.928547	0.0382	0.006	2.02e-10	0.502513
Cbm_Left_VI	rs11727676	4	145659064	T	C	0.9052	0.0744	0.0112	2.87e-11	0.782135	-	-	-	-
Cbm_Left_VI	rs2452495	4	181022748	C	G	0.0782	0.0693	0.0126	3.48e-08	0.44717	-	-	-	-
Cbm_Left_VI	rs293123	5	4644270	A	G	0.5808	0.0388	0.0068	9.69e-09	0.508516	-	-	-	-
Cbm_Left_VI	rs4702895	5	4663347	T	C	0.0823	0.0721	0.012	1.64e-09	0.584298	-	-	-	-
Cbm_Left_VI	rs13172077	5	53469059	A	G	0.7638	0.0545	0.0078	2.44e-12	0.878381	-	-	-	-
Cbm_Left_VI	rs55803832	5	81920587	A	C	0.6497	-	-	-	-	-0.0343	0.0063	4.31e-08	0.21911
Cbm_Left_VI	rs11949307	5	88191190	T	G	0.2298	0.0617	0.0078	2.76e-15	0.975637	-	-	-	-
Cbm_Left_VI	rs13173232	5	89413053	T	C	0.3104	-0.0399	0.0071	1.62e-08	0.4307	-	-	-	-
Cbm_Left_VI	rs7726679	5	112482649	A	G	0.6056	-0.0435	0.0068	1.34e-10	0.73443	-	-	-	-
Cbm_Left_VI	rs62370811	5	124067019	T	G	0.642	-0.0414	0.0069	2.18e-09	0.587982	-	-	-	-
Cbm_Left_VI	rs7705878	5	158386694	T	C	0.5242	0.0376	0.0066	9.99e-09	0.466668	-	-	-	-
Cbm_Left_VI	rs662033	6	8180292	T	G	0.6012	0.0402	0.0068	3.37e-09	0.56967	-	-	-	-
Cbm_Left_VI	rs1800562	6	26093141	A	G	0.0761	-	-	-	-	-0.0763	0.0113	1.42e-11	0.628807
Cbm_Left_VI	rs4707591	6	90768329	T	C	0.2864	0.051	0.0073	2.01e-12	0.872941	-	-	-	-
Cbm_Left_VI	rs2294405	6	99292136	A	G	0.3297	-0.0518	0.007	1.07e-13	0.934629	-	-	-	-
Cbm_Left_VI	rs9398810	6	126815604	A	C	0.4548	0.0419	0.0065	1.52e-10	0.696094	-	-	-	-
Cbm_Left_VI	rs9376271	6	137618394	C	G	0.5679	-0.0423	0.0067	2.19e-10	0.705025	-	-	-	-
Cbm_Left_VI	rs7769624	6	148535313	A	C	0.4281	0.0745	0.0066	3.18e-29	1	0.0373	0.0061	7.08e-10	0.430266
Cbm_Left_VI	rs6904955	6	157383274	A	C	0.6731	0.0597	0.007	1.97e-17	0.994722	-	-	-	-
Cbm_Left_VI	rs76110639	6	170706139	T	G	0.9884	-0.1765	0.0305	7.26e-09	0.480455	-	-	-	-
Cbm_Left_VI	rs9460138	6	170711828	T	C	0.222	0.044	0.0079	3.11e-08	0.411235	-	-	-	-
Cbm_Left_VI	rs2960266	7	101949128	T	C	0.3682	0.0438	0.0068	9.85e-11	0.721714	-	-	-	-
Cbm_Left_VI	rs652522	7	103393086	A	G	0.371	0.0464	0.0068	1.03e-11	0.830673	-	-	-	-
Cbm_Left_VI	rs141473	7	103407726	T	C	0.354	0.0838	0.0069	4.69e-34	1	-	-	-	-
Cbm_Left_VI	rs1510846	7	103421702	T	C	0.7396	-0.0415	0.0075	3.66e-08	0.403063	-	-	-	-
Cbm_Left_VI	rs145600349	7	103454030	T	C	0.014	0.1681	0.0284	3.07e-09	0.577091	-	-	-	-
Cbm_Left_VI	rs9792001	7	103512454	A	T	0.1537	-0.0511	0.0091	1.71e-08	0.427302	-	-	-	-
Cbm_Left_VI	rs3915119	7	103530887	A	C	0.4562	0.0486	0.0066	1.43e-13	0.929183	-	-	-	-
Cbm_Left_VI	rs17157475	7	103580446	T	C	0.8668	-0.0776	0.0096	7.12e-16	0.981622	-	-	-	-
Cbm_Left_VI	rs194847	7	103773168	T	G	0.4588	-0.046	0.0066	2.33e-12	0.864767	-	-	-	-
Cbm_Left_VI	rs2082533	7	132185123	A	T	0.5125	-0.0534	0.0069	1.27e-14	0.985416	-	-	-	-
Cbm_Left_VI	rs78455662	7	132197784	T	C	0.0742	0.0753	0.0125	1.74e-09	0.575489	-	-	-	-
Cbm_Left_VI	rs1731841	7	155652588	T	C	0.6828	-0.0404	0.0071	1.05e-08	0.469356	-	-	-	-
Cbm_Left_VI	rs10156241	8	68863901	A	C	0.4049	0.0433	0.0066	7.04e-11	0.733998	-	-	-	-
Cbm_Left_VI	rs6985531	8	77695388	T	C	0.8531	0.0696	0.0093	5.57e-14	0.944472	-	-	-	-
Cbm_Left_VI	rs7837823	8	120910779	T	C	0.2214	0.0475	0.0079	2.01e-09	0.57388	-	-	-	-
Cbm_Left_VI	rs10810187	9	14619168	A	G	0.2952	0.0573	0.0072	1.66e-15	0.978423	-	-	-	-
Cbm_Left_VI	rs9314809	9	76207300	A	G	0.6572	-0.0399	0.0069	7.02e-09	0.484935	-	-	-	-
Cbm_Left_VI	rs118017926	9	109626812	T	C	0.9743	0.1283	0.0207	5.44e-10	0.637712	-	-	-	-
Cbm_Left_VI	rs35565319	9	119065043	T	C	0.0706	0.087	0.0128	9.67e-12	0.821188	0.07	0.0117	2e-09	0.369694
Cbm_Left_VI	rs6478241	9	119252629	A	G	0.3627	-	-	-	-	-0.0341	0.0062	3.69e-08	0.22212
Cbm_Left_VI	rs9421819	10	48482576	C	G	0.7942	0.0517	0.0081	1.71e-10	0.699817	-	-	-	-
Cbm_Left_VI	rs9422354	10	48640536	T	C	0.0876	-0.0717	0.0116	5.96e-10	0.634321	-	-	-	-
Cbm_Left_VI	rs786819	10	48648356	A	C	0.8843	0.0837	0.0102	3.01e-16	0.986253	0.053	0.0093	1.47e-08	0.270552
Cbm_Left_VI	rs4752582	10	123443605	A	G	0.9247	-0.0779	0.0124	3.78e-10	0.66457	-	-	-	-
Cbm_Left_VI	rs6484290	11	10470852	A	G	0.5337	-	-	-	-	0.0382	0.006	2.27e-10	0.498452
Cbm_Left_VI	rs11228276	11	68307525	A	G	0.7425	-	-	-	-	-0.0376	0.0068	3.71e-08	0.225639
Cbm_Left_VI	rs7107785	11	95747337	T	C	0.4939	0.05	0.0066	2.27e-14	0.955088	-	-	-	-
Cbm_Left_VI	rs1123680	12	78241285	A	G	0.7627	0.0592	0.0078	2.82e-14	0.959934	-	-	-	-
Cbm_Left_VI	rs35872193	12	102442428	A	T	0.793	-	-	-	-	-0.0666	0.0074	2.89e-19	0.988236
Cbm_Left_VI	rs187441419	12	102532378	C	G	0.0072	-	-	-	-	-0.211	0.0354	2.59e-09	0.362374
Cbm_Left_VI	rs79519967	12	102850462	T	G	0.9911	0.2141	0.0349	8.65e-10	0.616713	-	-	-	-
Cbm_Left_VI	rs11111293	12	102921296	T	C	0.7772	-0.0473	0.0078	1.71e-09	0.569527	-	-	-	-
Cbm_Left_VI	rs703541	12	102938494	T	C	0.1379	-	-	-	-	-0.0545	0.0087	4.12e-10	0.466885
Cbm_Left_VI	rs76169231	12	102942969	T	C	0.7961	-	-	-	-	-0.0552	0.0074	7.91e-14	0.818057
Cbm_Left_VI	rs2241208	12	109962795	C	G	0.5132	0.0563	0.0065	8.46e-18	0.995285	0.0421	0.006	1.77e-12	0.713699
Cbm_Left_VI	rs549305	13	27139876	T	G	0.1924	0.0461	0.0083	3.01e-08	0.398592	0.0422	0.0076	2.75e-08	0.243886
Cbm_Left_VI	rs3907248	14	56636265	T	C	0.377	0.0389	0.0067	7.76e-09	0.475128	-	-	-	-
Cbm_Left_VI	rs10483677	14	57322440	A	G	0.764	0.0476	0.0077	7.07e-10	0.628013	-	-	-	-
Cbm_Left_VI	rs117332043	14	57617154	T	C	0.0681	-0.1954	0.013	6.25e-51	1	-	-	-	-
Cbm_Left_VI	rs76350445	14	57623935	T	C	0.0679	-	-	-	-	-0.1169	0.0119	7.87e-23	0.998488
Cbm_Left_VI	rs8011432	14	57659190	T	C	0.8617	-	-	-	-	0.0549	0.0086	1.79e-10	0.486524
Cbm_Left_VI	rs79191875	14	57684250	T	C	0.8592	0.0789	0.0093	3.14e-17	0.991719	-	-	-	-
Cbm_Left_VI	rs534727641	14	57811350	A	G	0.0076	-0.2279	0.0377	1.55e-09	0.581798	-	-	-	-
Cbm_Left_VI	rs12895814	14	59889884	C	G	0.5223	0.0362	0.0066	4.14e-08	0.388694	-	-	-	-
Cbm_Left_VI	rs61618811	15	67868973	A	G	0.0877	-0.0958	0.0116	1.87e-16	0.989206	-	-	-	-
Cbm_Left_VI	rs4776970	15	68080886	A	T	0.6389	-0.04	0.0068	3.98e-09	0.516246	-	-	-	-
Cbm_Left_VI	rs17379472	16	57693498	T	C	0.9633	0.1037	0.0174	2.69e-09	0.548692	-	-	-	-
Cbm_Left_VI	rs35195	16	65025718	A	G	0.3603	0.0391	0.0068	9.19e-09	0.465923	-	-	-	-
Cbm_Left_VI	rs9927319	16	69072128	T	C	0.8037	-0.0489	0.0083	3.52e-09	0.540172	-	-	-	-
Cbm_Left_VI	rs17605101	17	19877634	T	C	0.7123	-0.0427	0.0072	3.03e-09	0.529588	-	-	-	-
Cbm_Left_VI	rs1725643	17	20387214	T	C	0.6689	-0.0457	0.007	8.79e-11	0.757121	-	-	-	-
Cbm_Left_VI	rs2316766	17	43919068	T	G	0.212	-	-	-	-	-0.0495	0.0074	1.93e-11	0.628651
Cbm_Left_VI	rs2667932	17	44582284	T	G	0.7522	-	-	-	-	0.0527	0.008	5.9e-11	0.852937
Cbm_Left_VI	rs1105654	18	47147746	A	G	0.6582	0.0466	0.007	2.19e-11	0.807211	-	-	-	-
Cbm_Left_VI	rs11663934	18	73020715	T	C	0.6693	0.0468	0.007	2.15e-11	0.800464	-	-	-	-
Cbm_Left_VI	rs66500423	19	41195170	T	C	0.6879	0.0417	0.0071	4.32e-09	0.528657	-	-	-	-
Cbm_Left_VI	rs12624651	20	14841737	A	G	0.5772	-0.0457	0.0066	5.25e-12	0.842076	-	-	-	-
Cbm_Left_VI	rs79966207	22	50722408	T	C	0.8227	-0.0578	0.0086	1.47e-11	0.80502	-	-	-	-
Cbm_Left_VI	rs5945340	X	152955267	C	G	0.6522	-	-	-	-	0.0298	0.0053	2.33e-08	0.0814826
Cbm_Right_VI	rs7536233	1	2162473	T	C	0.1058	0.0625	0.0106	4.29e-09	0.517507	-	-	-	-
Cbm_Right_VI	rs309505	1	23231220	T	C	0.445	0.0414	0.0067	5.26e-10	0.666501	-	-	-	-
Cbm_Right_VI	rs11578639	1	46615056	T	C	0.796	-0.0452	0.0082	3.72e-08	0.403263	-	-	-	-
Cbm_Right_VI	rs11587399	1	50861071	A	T	0.7858	-0.0476	0.0079	2.16e-09	0.552152	-	-	-	-
Cbm_Right_VI	rs75117559	1	50882506	T	C	0.9503	-	-	-	-	-0.0778	0.0138	1.79e-08	0.266591
Cbm_Right_VI	rs1315085	1	51356764	T	C	0.5746	-0.0376	0.0066	1.24e-08	0.445303	-	-	-	-
Cbm_Right_VI	rs57401684	1	51571884	A	T	0.0742	0.094	0.0125	4.81e-14	0.944415	-	-	-	-
Cbm_Right_VI	rs11205817	1	51573963	A	T	0.0746	-	-	-	-	0.0769	0.0114	1.7e-11	0.627262
Cbm_Right_VI	rs1288492	1	53771564	T	C	0.4649	-0.039	0.0065	2.56e-09	0.543453	-	-	-	-
Cbm_Right_VI	rs2782492	1	53807582	C	G	0.357	-0.0447	0.0068	5.7e-11	0.748955	-	-	-	-
Cbm_Right_VI	rs12031794	1	54121818	T	C	0.2589	0.0408	0.0075	4.37e-08	0.365841	-	-	-	-
Cbm_Right_VI	rs7526644	1	154208753	T	C	0.4474	-	-	-	-	0.0351	0.006	6.08e-09	0.321738
Cbm_Right_VI	rs2221246	1	165297637	T	C	0.2204	-0.0487	0.0079	6.02e-10	0.625298	-	-	-	-
Cbm_Right_VI	rs647731	1	212692030	A	G	0.2191	0.0438	0.008	4.3e-08	0.392568	-	-	-	-
Cbm_Right_VI	rs1017154	2	36683708	A	G	0.3689	0.0435	0.0069	3.55e-10	0.708468	-	-	-	-
Cbm_Right_VI	rs1805165	2	88874891	A	C	0.7202	-	-	-	-	-0.0373	0.0067	2.45e-08	0.253231
Cbm_Right_VI	rs12997163	2	129909972	T	C	0.6604	-0.0402	0.0072	2.47e-08	0.496265	-	-	-	-
Cbm_Right_VI	rs66550497	2	205119737	T	C	0.7326	-0.0498	0.0074	1.57e-11	0.802366	-	-	-	-
Cbm_Right_VI	rs1868068	2	205463369	A	G	0.2415	-0.0421	0.0076	3.66e-08	0.38175	-	-	-	-
Cbm_Right_VI	rs56242731	2	206021360	A	G	0.0089	0.2366	0.0349	1.15e-11	0.816341	-	-	-	-
Cbm_Right_VI	rs849227	2	206262570	A	G	0.1442	0.0599	0.01	1.72e-09	0.713686	-	-	-	-
Cbm_Right_VI	rs35265460	2	206419018	A	G	0.3647	-0.0406	0.0068	2.17e-09	0.553733	-	-	-	-
Cbm_Right_VI	rs1045879	2	237489904	T	C	0.268	0.0414	0.0074	1.85e-08	0.416895	-	-	-	-
Cbm_Right_VI	rs9832454	3	50217558	T	C	0.0899	-0.074	0.0115	1.19e-10	0.725676	-	-	-	-
Cbm_Right_VI	rs35760104	3	56968541	A	G	0.8623	-0.054	0.0096	1.88e-08	0.447339	-	-	-	-
Cbm_Right_VI	rs2120927	3	134996284	T	C	0.7571	0.0456	0.0076	2.04e-09	0.555116	-	-	-	-
Cbm_Right_VI	rs1318947	4	4761862	A	G	0.6797	0.067	0.007	1.62e-21	0.999759	0.0543	0.0065	5.35e-17	0.963517
Cbm_Right_VI	rs11099497	4	82644654	T	C	0.3714	-0.0436	0.0072	1.84e-09	0.716037	-	-	-	-
Cbm_Right_VI	rs201081507	4	102681041	A	G	0.965	-	-	-	-	-0.1056	0.0183	7.77e-09	0.532288
Cbm_Right_VI	rs7685506	4	102973314	T	C	0.3973	0.0373	0.0067	3.13e-08	0.407493	-	-	-	-
Cbm_Right_VI	rs236765	4	103072288	T	C	0.3448	-	-	-	-	0.0398	0.0064	4.16e-10	0.48236
Cbm_Right_VI	rs13107325	4	103188709	T	C	0.0713	-	-	-	-	0.1367	0.0117	2.28e-31	0.999998
Cbm_Right_VI	rs55929428	4	103238268	T	C	0.6894	-	-	-	-	0.0376	0.0065	8.4e-09	0.316769
Cbm_Right_VI	rs11936470	4	125380922	A	G	0.4858	0.0411	0.0066	4.11e-10	0.663095	0.0367	0.006	1.29e-09	0.417555
Cbm_Right_VI	rs7340949	4	145590933	A	G	0.512	-0.04	0.0066	1.04e-09	0.604222	-	-	-	-
Cbm_Right_VI	rs11727676	4	145659064	T	C	0.9052	0.0843	0.0112	4.02e-14	0.946243	0.0633	0.0102	6.77e-10	0.442019
Cbm_Right_VI	rs3797269	5	53464403	T	C	0.235	-0.0444	0.0078	1.11e-08	0.472082	-	-	-	-
Cbm_Right_VI	rs11949307	5	88191190	T	G	0.2298	0.0615	0.0078	2.9e-15	0.974226	-	-	-	-
Cbm_Right_VI	rs13173232	5	89413053	T	C	0.3104	-0.0528	0.0071	7.45e-14	0.937387	-	-	-	-
Cbm_Right_VI	rs10477486	5	112399934	C	G	0.6397	-0.0493	0.0068	6.01e-13	0.905855	-	-	-	-
Cbm_Right_VI	rs11955685	5	173978058	A	G	0.7133	0.0414	0.0073	1.14e-08	0.460299	-	-	-	-
Cbm_Right_VI	rs111855006	6	20615422	T	C	0.6873	0.0398	0.0072	2.83e-08	0.429687	-	-	-	-
Cbm_Right_VI	rs6922448	6	22513914	A	G	0.5755	-0.0398	0.0066	1.72e-09	0.568302	-	-	-	-
Cbm_Right_VI	rs1800562	6	26093141	A	G	0.0761	-	-	-	-	-0.0732	0.0114	1.14e-10	0.537318
Cbm_Right_VI	rs4707591	6	90768329	T	C	0.2863	0.0465	0.0072	1.29e-10	0.711447	-	-	-	-
Cbm_Right_VI	rs3923049	6	99233448	T	C	0.6372	-	-	-	-	-0.0353	0.0063	2.39e-08	0.274525
Cbm_Right_VI	rs2294405	6	99292136	A	G	0.3298	-0.0513	0.007	1.62e-13	0.925691	-	-	-	-
Cbm_Right_VI	rs4240579	6	99926888	A	C	0.726	0.0406	0.0074	4.02e-08	0.391544	-	-	-	-
Cbm_Right_VI	rs2326451	6	126811928	A	T	0.5492	-0.0392	0.0066	2.15e-09	0.549459	-	-	-	-
Cbm_Right_VI	rs9493180	6	132453246	T	C	0.6547	0.0452	0.0069	4.08e-11	0.755707	-	-	-	-
Cbm_Right_VI	rs9376271	6	137618394	C	G	0.5679	-0.0423	0.0066	1.89e-10	0.705025	-	-	-	-
Cbm_Right_VI	rs7769624	6	148535313	A	C	0.4281	0.0693	0.0066	1.29e-25	0.999993	0.036	0.0061	3.64e-09	0.359541
Cbm_Right_VI	rs6904955	6	157383274	A	C	0.6731	0.0585	0.007	6.9e-17	0.99171	-	-	-	-
Cbm_Right_VI	rs2295205	6	170592293	C	G	0.7466	0.0478	0.008	2.12e-09	0.688727	-	-	-	-
Cbm_Right_VI	rs76110639	6	170706139	T	G	0.9884	-0.1704	0.0304	2.2e-08	0.406776	-	-	-	-
Cbm_Right_VI	rs17860755	6	170716709	A	T	0.1178	0.0651	0.0101	1.38e-10	0.708204	-	-	-	-
Cbm_Right_VI	rs73187868	7	101904262	A	G	0.3171	0.0453	0.0071	2.02e-10	0.717354	-	-	-	-
Cbm_Right_VI	rs117683657	7	103259060	A	C	0.0361	-0.1031	0.0175	4.11e-09	0.518456	-	-	-	-
Cbm_Right_VI	rs652522	7	103393086	A	G	0.3709	0.0538	0.0068	2.68e-15	0.976131	-	-	-	-
Cbm_Right_VI	rs141473	7	103407726	T	C	0.354	0.0868	0.0069	1.4e-36	1	0.0417	0.0063	4.13e-11	0.598519
Cbm_Right_VI	rs1510846	7	103421702	T	C	0.7396	-0.0459	0.0075	1.01e-09	0.620559	-	-	-	-
Cbm_Right_VI	rs147037411	7	103493306	T	C	0.9684	-0.114	0.0188	1.42e-09	0.59849	-	-	-	-
Cbm_Right_VI	rs2299397	7	103529336	A	G	0.5439	-0.043	0.0065	5.06e-11	0.749004	-	-	-	-
Cbm_Right_VI	rs7796597	7	103577577	T	C	0.8875	-	-	-	-	-0.0563	0.0095	3.65e-09	0.357798
Cbm_Right_VI	rs17157475	7	103580446	T	C	0.8668	-0.0838	0.0096	2.39e-18	0.996447	-	-	-	-
Cbm_Right_VI	rs6973058	7	103850321	T	C	0.5332	0.0421	0.0065	1.16e-10	0.70989	-	-	-	-
Cbm_Right_VI	rs2082533	7	132185123	A	T	0.5125	-0.0547	0.0069	2.4e-15	0.991041	-	-	-	-
Cbm_Right_VI	rs1731841	7	155652588	T	C	0.6828	-0.0395	0.007	1.94e-08	0.422032	-	-	-	-
Cbm_Right_VI	rs2289592	8	26484374	C	G	0.4165	-0.0373	0.0066	1.61e-08	0.42263	-	-	-	-
Cbm_Right_VI	rs4487746	8	68805608	A	G	0.1332	-0.0541	0.0096	1.76e-08	0.422024	-	-	-	-
Cbm_Right_VI	rs10156241	8	68863901	A	C	0.4049	0.0534	0.0066	7.56e-16	0.979525	0.0378	0.0061	5.72e-10	0.44123
Cbm_Right_VI	rs7007731	8	77695732	T	C	0.1449	-0.073	0.0093	5.44e-15	0.971028	-	-	-	-
Cbm_Right_VI	rs7837823	8	120910779	T	C	0.2214	0.0459	0.0079	5.97e-09	0.498493	-	-	-	-
Cbm_Right_VI	rs10810187	9	14619168	A	G	0.2952	0.0491	0.0072	7.97e-12	0.829337	-	-	-	-
Cbm_Right_VI	rs35565319	9	119065043	T	C	0.0706	0.1214	0.0127	1.6e-21	0.999713	0.0875	0.0117	9.21e-14	0.828474
Cbm_Right_VI	rs10828323	10	22891627	A	G	0.2737	0.0417	0.0074	1.53e-08	0.445603	-	-	-	-
Cbm_Right_VI	rs9421819	10	48482576	C	G	0.7942	0.0483	0.0081	2.27e-09	0.551959	-	-	-	-
Cbm_Right_VI	rs9422354	10	48640536	T	C	0.0876	-0.076	0.0116	4.84e-11	0.755264	-	-	-	-
Cbm_Right_VI	rs786819	10	48648356	A	C	0.8843	0.0789	0.0102	1.07e-14	0.961202	-	-	-	-
Cbm_Right_VI	rs7906891	10	123442335	C	G	0.6412	-0.041	0.0069	2.95e-09	0.5676	-	-	-	-
Cbm_Right_VI	rs11605232	11	10468501	T	C	0.5321	-	-	-	-	0.0354	0.0061	6.23e-09	0.343709
Cbm_Right_VI	rs10765782	11	95745187	T	G	0.505	-0.0475	0.0065	3.79e-13	0.909666	-	-	-	-
Cbm_Right_VI	rs1123680	12	78241285	A	G	0.7627	0.0614	0.0078	2.51e-15	0.978199	-	-	-	-
Cbm_Right_VI	rs35872193	12	102442428	A	T	0.7931	-	-	-	-	-0.0638	0.0075	1.34e-17	0.973805
Cbm_Right_VI	rs187441419	12	102532378	C	G	0.0072	-0.2274	0.0386	4.01e-09	0.517746	-0.2273	0.0356	1.8e-10	0.516782
Cbm_Right_VI	rs11111278	12	102846020	A	G	0.7921	-0.0477	0.0081	3.6e-09	0.53266	-	-	-	-
Cbm_Right_VI	rs703546	12	102943208	A	G	0.8621	-	-	-	-	0.0538	0.0088	8.6e-10	0.439554
Cbm_Right_VI	rs78929770	12	102946220	A	C	0.0883	-	-	-	-	0.0723	0.0106	7.57e-12	0.661265
Cbm_Right_VI	rs2241208	12	109962795	C	G	0.5132	0.0583	0.0065	4.74e-19	0.998027	-	-	-	-
Cbm_Right_VI	rs12321904	12	109989228	T	G	0.5084	-	-	-	-	0.0429	0.006	9.35e-13	0.751717
Cbm_Right_VI	rs1152463	14	56760329	A	G	0.3156	0.0406	0.0071	9.42e-09	0.477034	-	-	-	-
Cbm_Right_VI	rs117332043	14	57617154	T	C	0.0681	-0.1497	0.013	1.03e-30	1	-0.0997	0.0119	6.47e-17	0.959062
Cbm_Right_VI	rs79191875	14	57684250	T	C	0.8592	0.0546	0.0093	4.61e-09	0.490908	-	-	-	-
Cbm_Right_VI	rs2349702	14	59843472	T	C	0.5157	0.0538	0.0071	3.86e-14	0.98736	-	-	-	-
Cbm_Right_VI	rs1435754	15	47930421	C	G	0.6464	-0.0385	0.0068	1.51e-08	0.424675	-	-	-	-
Cbm_Right_VI	rs2583590	15	67836253	A	C	0.0868	-0.0926	0.0116	1.64e-15	0.977434	-	-	-	-
Cbm_Right_VI	rs12050481	15	68023809	T	C	0.3922	0.0394	0.0067	4.3e-09	0.518972	-	-	-	-
Cbm_Right_VI	rs62011975	15	82451554	T	C	0.2378	-	-	-	-	0.0389	0.007	3.33e-08	0.236683
Cbm_Right_VI	rs62009923	15	83248432	A	G	0.5469	0.0359	0.0066	4.61e-08	0.365756	-	-	-	-
Cbm_Right_VI	rs12916224	15	88883737	A	G	0.3055	-	-	-	-	0.038	0.0065	6.5e-09	0.326515
Cbm_Right_VI	rs17379472	16	57693498	T	C	0.9633	0.1221	0.0174	2.25e-12	0.866993	-	-	-	-
Cbm_Right_VI	rs35226	16	65007916	T	C	0.3603	0.0453	0.0068	2.73e-11	0.778183	-	-	-	-
Cbm_Right_VI	rs1205769	16	66143181	A	G	0.1971	-0.0492	0.0083	3.44e-09	0.557071	-	-	-	-
Cbm_Right_VI	rs111413717	16	68925092	A	G	0.8211	-0.0472	0.0086	3.63e-08	0.389603	-	-	-	-
Cbm_Right_VI	rs62054807	17	43915497	T	C	0.291	-	-	-	-	-0.0405	0.0066	9.16e-10	0.423104
Cbm_Right_VI	rs2667932	17	44582284	T	G	0.7522	-	-	-	-	0.0524	0.0081	9.86e-11	0.844248
Cbm_Right_VI	rs1105654	18	47147746	A	G	0.6582	0.0466	0.007	2e-11	0.807211	-	-	-	-
Cbm_Right_VI	rs55881196	18	73018340	C	G	0.6634	0.0464	0.0069	2.3e-11	0.793055	-	-	-	-
Cbm_Right_VI	rs7253633	19	38622162	A	G	0.426	0.0425	0.0066	1.52e-10	0.711107	-	-	-	-
Cbm_Right_VI	rs6074807	20	14837465	A	G	0.4219	0.0535	0.0066	6.04e-16	0.982307	-	-	-	-
Cbm_Right_VI	rs79966207	22	50722408	T	C	0.8227	-0.0496	0.0085	6.32e-09	0.485506	-	-	-	-
Cbm_Left_CrusI	rs114745413	1	51179311	A	G	0.9553	-0.1051	0.0156	1.64e-11	0.775652	-0.1064	0.0151	1.77e-12	0.79799
Cbm_Left_CrusI	rs6703250	1	51418472	T	C	0.5856	-0.0382	0.0066	8.67e-09	0.471224	-0.0395	0.0064	7.72e-10	0.544115
Cbm_Left_CrusI	rs41287294	1	51768410	A	C	0.0513	0.1358	0.0145	1.01e-20	0.999087	0.1267	0.0141	2.05e-19	0.99437
Cbm_Left_CrusI	rs305464	1	88185216	A	G	0.2024	0.0508	0.0081	4.59e-10	0.649322	-	-	-	-
Cbm_Left_CrusI	rs6428600	1	91192297	C	G	0.5476	0.0399	0.0065	8.63e-10	0.589288	-	-	-	-
Cbm_Left_CrusI	rs12410426	1	231846421	T	C	0.9551	-0.091	0.0156	5.68e-09	0.474261	-	-	-	-
Cbm_Left_CrusI	rs17749164	1	231897207	T	C	0.5981	-0.088	0.0066	6.36e-41	1	-0.0518	0.0064	3.57e-16	0.964815
Cbm_Left_CrusI	rs72758645	1	231904002	A	G	0.8964	0.0622	0.0105	3.33e-09	0.486821	-	-	-	-
Cbm_Left_CrusI	rs2793101	1	231904278	T	C	0.1081	-0.068	0.0104	5.88e-11	0.720658	-	-	-	-
Cbm_Left_CrusI	rs62114518	2	16438041	T	G	0.3244	0.0381	0.0069	2.86e-08	0.362069	-	-	-	-
Cbm_Left_CrusI	rs10191542	2	16439155	C	G	0.0749	-0.0668	0.0122	4.6e-08	0.335335	-	-	-	-
Cbm_Left_CrusI	rs4672040	2	55640649	A	G	0.8803	-0.0564	0.0099	1.19e-08	0.413687	-	-	-	-
Cbm_Left_CrusI	rs77802918	2	59197366	T	C	0.1277	-0.0559	0.0098	1.04e-08	0.452927	-0.0519	0.0094	3.7e-08	0.307912
Cbm_Left_CrusI	rs17643402	2	59520832	T	C	0.8742	-0.0666	0.0098	8.36e-12	0.805889	-	-	-	-
Cbm_Left_CrusI	rs12328348	2	60785937	A	G	0.5314	-0.0441	0.0065	8.72e-12	0.799559	-	-	-	-
Cbm_Left_CrusI	rs12713596	2	67550323	A	T	0.6722	-0.0434	0.0069	3.62e-10	0.64524	-	-	-	-
Cbm_Left_CrusI	rs72971966	2	121605370	A	G	0.1403	-0.0532	0.0093	1.12e-08	0.432524	-	-	-	-
Cbm_Left_CrusI	rs12464825	2	165394580	T	G	0.4272	-0.0545	0.0065	4.96e-17	0.988026	-	-	-	-
Cbm_Left_CrusI	rs11683488	2	165401487	A	G	0.4259	-	-	-	-	-0.0436	0.0063	4.32e-12	0.761791
Cbm_Left_CrusI	rs56071403	2	200041467	T	C	0.4196	0.0468	0.0068	4.38e-12	0.875279	-	-	-	-
Cbm_Left_CrusI	rs13397495	2	200251089	T	C	0.1136	-0.0583	0.0101	8.27e-09	0.435201	-	-	-	-
Cbm_Left_CrusI	rs6714490	2	207907469	A	G	0.7376	-0.0581	0.0073	1.66e-15	0.968367	-0.0487	0.0071	5.13e-12	0.749018
Cbm_Left_CrusI	rs741475	2	208087139	T	C	0.5756	-0.044	0.0065	1.48e-11	0.778107	-	-	-	-
Cbm_Left_CrusI	rs284526	2	217337783	A	G	0.4698	0.0353	0.0064	4.2e-08	0.338888	-	-	-	-
Cbm_Left_CrusI	rs7578471	2	217750506	A	G	0.4507	0.0552	0.0065	1.41e-17	0.991866	0.0437	0.0062	2.49e-12	0.777805
Cbm_Left_CrusI	rs2234675	2	223085955	T	G	0.0423	-0.1411	0.0159	8.09e-19	0.996212	-0.0858	0.0154	2.71e-08	0.299315
Cbm_Left_CrusI	rs2600787	2	237615524	A	G	0.6261	-0.0455	0.0068	2.84e-11	0.800211	-	-	-	-
Cbm_Left_CrusI	rs2324470	3	76115803	A	T	0.5826	0.0358	0.0065	4.33e-08	0.342693	-	-	-	-
Cbm_Left_CrusI	rs1016584	3	89343169	T	C	0.4538	-	-	-	-	0.0372	0.0063	2.63e-09	0.437459
Cbm_Left_CrusI	rs6768381	3	89358071	T	C	0.5393	-0.0495	0.0065	1.74e-14	0.945574	-	-	-	-
Cbm_Left_CrusI	rs59652930	3	134986768	A	G	0.1463	-0.0676	0.0091	9.19e-14	0.916083	-	-	-	-
Cbm_Left_CrusI	rs2172442	4	4762383	C	G	0.6799	0.057	0.0069	1.65e-16	0.984321	0.0477	0.0067	9.82e-13	0.818727
Cbm_Left_CrusI	rs35694279	4	19472347	A	G	0.2268	-	-	-	-	0.0412	0.0074	2.97e-08	0.300787
Cbm_Left_CrusI	rs7691642	4	20685544	T	C	0.3943	-0.0361	0.0066	4.88e-08	0.341434	-0.0386	0.0064	1.57e-09	0.476439
Cbm_Left_CrusI	rs781662	4	57780693	A	G	0.4254	-0.0425	0.0065	6.03e-11	0.710732	-0.0483	0.0063	1.39e-14	0.915582
Cbm_Left_CrusI	rs6552079	4	68026392	T	G	0.5586	-0.0374	0.0065	7.16e-09	0.443218	-	-	-	-
Cbm_Left_CrusI	rs1605761	4	121120419	T	C	0.1038	0.0755	0.0106	9.54e-13	0.871239	-	-	-	-
Cbm_Left_CrusI	rs78087187	4	121153634	A	C	0.8419	0.05	0.0088	1.61e-08	0.406316	-	-	-	-
Cbm_Left_CrusI	rs13151061	4	129524513	A	G	0.3239	-0.0407	0.007	6.16e-09	0.497225	-	-	-	-
Cbm_Left_CrusI	rs35001069	5	87631597	T	C	0.2503	-0.0426	0.0074	8.56e-09	0.42999	-	-	-	-
Cbm_Left_CrusI	rs17560514	5	88189025	A	G	0.2299	-0.0551	0.0077	6.07e-13	0.880429	-	-	-	-
Cbm_Left_CrusI	rs2920507	5	89419677	A	C	0.3102	0.0661	0.007	1.97e-21	0.999506	0.0458	0.0067	9.4e-12	0.727138
Cbm_Left_CrusI	rs1981627	5	133838180	A	G	0.4143	0.045	0.0066	1.14e-11	0.812189	-	-	-	-
Cbm_Left_CrusI	rs62385362	5	158279381	T	C	0.7749	0.0431	0.0077	2.12e-08	0.379804	-	-	-	-
Cbm_Left_CrusI	rs6867332	5	158380961	A	T	0.6232	-	-	-	-	0.038	0.0064	2.69e-09	0.425446
Cbm_Left_CrusI	rs2964537	5	170732970	T	C	0.1943	-	-	-	-	0.0463	0.0079	4.2e-09	0.414921
Cbm_Left_CrusI	rs6888586	5	170740600	C	G	0.1938	0.0483	0.0082	3.28e-09	0.502436	-	-	-	-
Cbm_Left_CrusI	rs4960417	6	8438681	T	C	0.5716	-0.0444	0.0065	9.68e-12	0.796717	-	-	-	-
Cbm_Left_CrusI	rs72831708	6	8730954	T	G	0.0626	0.1483	0.0133	5.72e-29	0.999999	0.0883	0.0128	5.8e-12	0.746538
Cbm_Left_CrusI	rs62404806	6	22419656	T	C	0.7934	0.0482	0.0079	1.18e-09	0.550553	-	-	-	-
Cbm_Left_CrusI	rs6922448	6	22513914	A	G	0.5755	-0.0627	0.0065	5.39e-22	0.999678	-0.0481	0.0063	2.19e-14	0.910811
Cbm_Left_CrusI	rs13195654	6	22601416	C	G	0.6566	-0.0434	0.0068	1.82e-10	0.670013	-0.0368	0.0066	2.14e-08	0.323872
Cbm_Left_CrusI	rs6899930	6	37111059	T	C	0.3385	-0.0408	0.007	5.67e-09	0.52693	-	-	-	-
Cbm_Left_CrusI	rs79925073	6	98050838	A	C	0.0138	0.1693	0.0277	9.12e-10	0.577136	-	-	-	-
Cbm_Left_CrusI	rs9375711	6	99297389	A	T	0.3287	-0.0424	0.007	1.1e-09	0.595686	-	-	-	-
Cbm_Left_CrusI	rs522862	6	100139610	A	G	0.1954	-0.0497	0.0081	7.79e-10	0.572194	-	-	-	-
Cbm_Left_CrusI	rs9456885	6	164242262	T	G	0.5648	-0.0401	0.0065	6.96e-10	0.59168	-	-	-	-
Cbm_Left_CrusI	rs73338474	7	5400300	A	G	0.1376	0.0515	0.0094	4.18e-08	0.351846	-	-	-	-
Cbm_Left_CrusI	rs3779381	7	120966790	A	G	0.7375	-0.0498	0.0073	1.11e-11	0.791865	-	-	-	-
Cbm_Left_CrusI	rs78455662	7	132197784	T	C	0.0742	-0.1019	0.0123	1.06e-16	0.985584	-0.0723	0.0119	1.12e-09	0.484872
Cbm_Left_CrusI	rs156977	7	132202277	C	G	0.668	-0.0775	0.0068	6.71e-30	1	-0.0528	0.0066	1.25e-15	0.951313
Cbm_Left_CrusI	rs10954384	7	132264224	A	G	0.5147	-0.0461	0.0065	1.42e-12	0.871987	-	-	-	-
Cbm_Left_CrusI	rs1391991	7	132313960	A	G	0.3304	0.039	0.0069	1.34e-08	0.417692	-	-	-	-
Cbm_Left_CrusI	rs185178587	7	132380807	A	T	0.0276	-0.1147	0.0201	1.12e-08	0.468104	-	-	-	-
Cbm_Left_CrusI	rs3757846	7	155249032	T	C	0.1565	-0.0543	0.009	1.28e-09	0.574694	-	-	-	-
Cbm_Left_CrusI	rs35589962	7	156064607	T	C	0.193	-0.047	0.0086	4.47e-08	0.440685	-	-	-	-
Cbm_Left_CrusI	rs4537191	7	156083152	T	C	0.5823	0.0417	0.0065	1.63e-10	0.665588	-	-	-	-
Cbm_Left_CrusI	rs4304216	7	156092669	A	T	0.4166	-	-	-	-	-0.0425	0.0063	1.62e-11	0.704992
Cbm_Left_CrusI	rs7832234	8	26469638	A	C	0.8083	0.0513	0.0082	4.03e-10	0.626024	-	-	-	-
Cbm_Left_CrusI	rs6472979	8	77566165	A	C	0.7138	-0.0404	0.0071	1.35e-08	0.40836	-	-	-	-
Cbm_Left_CrusI	rs58357751	8	77595642	A	C	0.0609	0.1261	0.0135	1.02e-20	0.999247	-	-	-	-
Cbm_Left_CrusI	rs10504634	8	77607481	A	G	0.0485	-	-	-	-	0.1133	0.0145	5.36e-15	0.934181
Cbm_Left_CrusI	rs7826554	8	78651309	A	C	0.3457	0.0428	0.0068	2.87e-10	0.643433	-	-	-	-
Cbm_Left_CrusI	rs1901062	8	106589534	A	G	0.5849	0.0375	0.0066	1.13e-08	0.432689	-	-	-	-
Cbm_Left_CrusI	rs35807050	8	142040409	A	T	0.5864	0.0381	0.0065	5.71e-09	0.465015	-	-	-	-
Cbm_Left_CrusI	rs13296430	9	14689163	T	C	0.5159	0.0354	0.0064	3.92e-08	0.34659	0.0342	0.0062	4.22e-08	0.285676
Cbm_Left_CrusI	rs17355255	9	83762763	A	G	0.2506	-	-	-	-	0.042	0.0072	5.48e-09	0.401274
Cbm_Left_CrusI	rs2988070	9	92132927	T	C	0.4184	-	-	-	-	0.0385	0.0064	1.94e-09	0.491046
Cbm_Left_CrusI	rs10752652	9	92224551	T	C	0.4868	0.0358	0.0066	4.81e-08	0.368223	-	-	-	-
Cbm_Left_CrusI	rs12344396	9	118921327	C	G	0.6084	-	-	-	-	-0.0407	0.0064	2.14e-10	0.590424
Cbm_Left_CrusI	rs10759832	9	118930313	T	C	0.6118	-0.0587	0.0066	6.56e-19	0.996831	-	-	-	-
Cbm_Left_CrusI	rs72754248	9	119061396	A	G	0.0706	0.2173	0.0125	2.29e-67	1	0.175	0.0121	3.66e-47	1
Cbm_Left_CrusI	rs72754249	9	119064017	T	C	0.9947	-0.2592	0.0442	4.37e-09	0.471447	-0.2435	0.0426	1.12e-08	0.362993
Cbm_Left_CrusI	rs3747825	9	119078611	A	G	0.6501	0.0421	0.0067	4.14e-10	0.613544	-	-	-	-
Cbm_Left_CrusI	rs10120448	9	119110440	A	T	0.2825	-	-	-	-	-0.0398	0.007	1.65e-08	0.371316
Cbm_Left_CrusI	rs10817872	9	119125449	A	T	0.6156	-0.0442	0.0067	3.22e-11	0.756619	-	-	-	-
Cbm_Left_CrusI	rs3891689	9	119258583	T	C	0.7662	0.043	0.0076	1.48e-08	0.401647	-	-	-	-
Cbm_Left_CrusI	rs1861881	9	119312256	T	G	0.313	-	-	-	-	-0.0387	0.0067	7.93e-09	0.37418
Cbm_Left_CrusI	rs17292645	9	119503354	A	G	0.8147	-	-	-	-	-0.0441	0.008	3.97e-08	0.290599
Cbm_Left_CrusI	rs306549	9	135470176	C	G	0.2342	-0.0485	0.0076	1.64e-10	0.662878	-	-	-	-
Cbm_Left_CrusI	rs2000099	10	31118096	T	C	0.6361	0.0369	0.0067	3.69e-08	0.353188	-	-	-	-
Cbm_Left_CrusI	rs786819	10	48648356	A	C	0.8843	-0.0595	0.01	3.14e-09	0.495614	-	-	-	-
Cbm_Left_CrusI	rs72828403	10	122871128	A	G	0.9317	0.1243	0.0127	1.02e-22	0.999782	0.0885	0.0123	5.34e-13	0.824125
Cbm_Left_CrusI	rs10750497	11	131975079	C	G	0.2869	0.0538	0.0071	3.9e-14	0.934012	-	-	-	-
Cbm_Left_CrusI	rs10466626	11	131978584	A	T	0.7045	-	-	-	-	-0.0432	0.0068	2.72e-10	0.572457
Cbm_Left_CrusI	rs7971939	12	102407432	A	T	0.7801	-	-	-	-	-0.0457	0.0075	1.11e-09	0.484104
Cbm_Left_CrusI	rs10778165	12	102421344	A	C	0.7537	-0.0423	0.0075	1.4e-08	0.40448	-	-	-	-
Cbm_Left_CrusI	rs703546	12	102943208	A	G	0.8621	0.0591	0.0094	2.95e-10	0.645764	0.0651	0.0091	6.78e-13	0.831964
Cbm_Left_CrusI	rs34423035	12	130319808	C	G	0.8764	-0.0681	0.0098	4.66e-12	0.830589	-	-	-	-
Cbm_Left_CrusI	rs539496	13	27137385	T	C	0.1924	0.0494	0.0082	1.49e-09	0.54582	-	-	-	-
Cbm_Left_CrusI	rs696908	13	103618857	C	G	0.3735	0.0655	0.0067	6.74e-23	0.999848	0.0422	0.0064	5.24e-11	0.64937
Cbm_Left_CrusI	rs67359979	13	103668545	A	G	0.11	-0.0641	0.0103	5.33e-10	0.611039	-	-	-	-
Cbm_Left_CrusI	rs113676217	13	103684886	A	C	0.0335	0.1072	0.018	2.85e-09	0.524975	-	-	-	-
Cbm_Left_CrusI	rs1002572	13	103852619	A	G	0.8563	0.0507	0.0092	3.5e-08	0.356539	-	-	-	-
Cbm_Left_CrusI	rs2263246	13	103904453	T	G	0.813	-	-	-	-	0.0551	0.008	5.06e-12	0.756274
Cbm_Left_CrusI	rs1569270	13	103924502	A	G	0.1881	-0.0957	0.0082	2.38e-31	1	-	-	-	-
Cbm_Left_CrusI	rs3916927	13	103927135	A	G	0.2805	0.0419	0.0074	1.26e-08	0.471826	-	-	-	-
Cbm_Left_CrusI	rs1398586	13	104750688	A	C	0.1344	-0.0809	0.0094	1.13e-17	0.992646	-0.06	0.0091	5.2e-11	0.655033
Cbm_Left_CrusI	rs10483677	14	57322440	A	G	0.764	-	-	-	-	0.0402	0.0073	4.15e-08	0.284312
Cbm_Left_CrusI	rs995526	14	57552534	A	G	0.2406	-0.0434	0.0075	6.96e-09	0.440972	-	-	-	-
Cbm_Left_CrusI	rs117332043	14	57617154	T	C	0.0681	-	-	-	-	-0.1367	0.0123	1.55e-28	0.999995
Cbm_Left_CrusI	rs76350445	14	57623935	T	C	0.0679	-0.1558	0.0128	4.37e-34	1	-	-	-	-
Cbm_Left_CrusI	rs55906330	14	57668188	A	G	0.1334	-	-	-	-	-0.0698	0.0098	1.12e-12	0.908901
Cbm_Left_CrusI	rs10137379	14	57674867	T	C	0.859	0.0677	0.0092	1.5e-13	0.900597	-	-	-	-
Cbm_Left_CrusI	rs62650186	14	69140240	T	C	0.4992	-0.0433	0.0065	3.03e-11	0.769752	-	-	-	-
Cbm_Left_CrusI	rs75120172	14	69189196	T	C	0.9611	-0.1073	0.0165	8.09e-11	0.684282	-	-	-	-
Cbm_Left_CrusI	rs194772	14	69201003	A	G	0.485	0.0377	0.0065	6.7e-09	0.4739	-	-	-	-
Cbm_Left_CrusI	rs80111818	14	69228562	T	C	0.126	-0.0656	0.0097	1.31e-11	0.779997	-0.0564	0.0094	1.74e-09	0.45894
Cbm_Left_CrusI	rs79299068	14	69247174	T	C	0.9716	0.1154	0.0193	2.24e-09	0.511299	-	-	-	-
Cbm_Left_CrusI	rs927292	14	69258841	C	G	0.3227	-0.0509	0.0069	1.07e-13	0.911855	-	-	-	-
Cbm_Left_CrusI	rs17106304	14	69260511	C	G	0.3443	-	-	-	-	-0.0373	0.0065	1.14e-08	0.349548
Cbm_Left_CrusI	rs1547050	14	69274950	T	C	0.3124	0.106	0.0069	1.51e-52	1	0.0811	0.0067	1.41e-33	1
Cbm_Left_CrusI	rs10129303	14	86315004	A	T	0.3808	0.0583	0.0068	1.78e-17	0.99591	-	-	-	-
Cbm_Left_CrusI	rs57919607	14	99750235	A	G	0.1251	0.0554	0.0098	1.37e-08	0.415926	-	-	-	-
Cbm_Left_CrusI	rs8035136	15	47977010	A	G	0.6596	0.0434	0.0069	2.97e-10	0.665505	-	-	-	-
Cbm_Left_CrusI	rs17298032	15	67719693	T	C	0.9102	-	-	-	-	-0.1087	0.0109	1.48e-23	0.999711
Cbm_Left_CrusI	rs8028912	15	67876277	A	G	0.9143	-0.1638	0.0115	4.25e-46	1	-	-	-	-
Cbm_Left_CrusI	rs137913180	15	68164691	T	C	0.9764	-0.1248	0.0212	4.13e-09	0.485643	-	-	-	-
Cbm_Left_CrusI	rs8023459	15	69955116	T	C	0.6407	-0.0404	0.0067	2.05e-09	0.535712	-0.0372	0.0065	1.09e-08	0.363341
Cbm_Left_CrusI	rs2705475	15	87784222	T	C	0.3354	-0.0403	0.0069	5.08e-09	0.495031	-	-	-	-
Cbm_Left_CrusI	rs2356265	16	49450047	A	G	0.7656	0.0684	0.0077	4.11e-19	0.997712	0.0538	0.0074	3.54e-13	0.856239
Cbm_Left_CrusI	rs2193002	17	55656286	A	G	0.1567	0.0516	0.0089	5.61e-09	0.464343	-	-	-	-
Cbm_Left_CrusI	rs45579131	18	22931508	A	G	0.3376	-0.0411	0.0068	1.29e-09	0.541631	-	-	-	-
Cbm_Left_CrusI	rs3816125	18	44601611	A	G	0.5468	-0.048	0.0065	1.08e-13	0.916274	-	-	-	-
Cbm_Left_CrusI	rs2571001	18	44665083	A	C	0.4844	-	-	-	-	0.0367	0.0062	3.65e-09	0.417372
Cbm_Left_CrusI	rs78229985	18	44820823	T	C	0.9933	0.3335	0.0395	3.26e-17	0.990062	0.2575	0.0381	1.39e-11	0.710185
Cbm_Left_CrusI	rs4891261	18	73017142	T	C	0.3508	-	-	-	-	-0.0645	0.0065	4.46e-23	0.999601
Cbm_Left_CrusI	rs4891263	18	73017428	C	G	0.6633	0.086	0.0068	2.41e-36	1	-	-	-	-
Cbm_Left_CrusI	rs189895705	18	73328744	A	C	0.0187	-0.1327	0.0238	2.48e-08	0.377123	-	-	-	-
Cbm_Left_CrusI	rs557987931	19	50094428	C	G	0.9538	0.0979	0.0153	1.5e-10	0.664061	-	-	-	-
Cbm_Left_CrusI	rs8127603	21	33886658	T	C	0.7261	-0.0444	0.0072	7.1e-10	0.582729	-	-	-	-
Cbm_Left_CrusI	rs134016	22	28038356	A	G	0.8013	-0.0456	0.0082	2.3e-08	0.401182	-	-	-	-
Cbm_Left_CrusI	rs5934887	X	10335595	A	T	0.3421	0.0353	0.0056	3.75e-10	0.253151	-	-	-	-
Cbm_Left_CrusI	rs7879377	X	10336930	A	G	0.0449	0.0735	0.0127	6.7e-09	0.135446	-	-	-	-
Cbm_Left_CrusI	rs12013955	X	68056802	T	C	0.1606	-0.0448	0.0072	5.44e-10	0.226684	-	-	-	-
Cbm_Right_CrusI	rs75117559	1	50882506	T	C	0.9503	-	-	-	-	-0.0908	0.0139	7.05e-11	0.573066
Cbm_Right_CrusI	rs12094601	1	51075040	A	T	0.4326	-	-	-	-	0.0376	0.0061	7.02e-10	0.449522
Cbm_Right_CrusI	rs11584472	1	51114503	T	C	0.5679	-0.0381	0.0063	1.88e-09	0.477546	-	-	-	-
Cbm_Right_CrusI	rs114745413	1	51179311	A	G	0.9553	-0.107	0.0153	2.57e-12	0.807834	-	-	-	-
Cbm_Right_CrusI	rs12072311	1	51572465	C	G	0.0532	-	-	-	-	0.1232	0.0135	8.09e-20	0.99283
Cbm_Right_CrusI	rs41287294	1	51768410	A	C	0.0513	0.1435	0.0143	8.16e-24	0.999843	-	-	-	-
Cbm_Right_CrusI	rs77047833	1	52114391	A	G	0.96	-	-	-	-	-0.099	0.0155	1.78e-10	0.534913
Cbm_Right_CrusI	rs1288518	1	53746134	A	G	0.3979	-	-	-	-	-0.0364	0.0062	5.27e-09	0.359925
Cbm_Right_CrusI	rs4623641	1	53751610	T	C	0.3734	-0.0377	0.0065	7.61e-09	0.405652	-	-	-	-
Cbm_Right_CrusI	rs305464	1	88185216	A	G	0.2024	0.0515	0.008	1.16e-10	0.678661	-	-	-	-
Cbm_Right_CrusI	rs4593803	1	91231232	A	G	0.6193	-0.043	0.0065	4.28e-11	0.697575	-	-	-	-
Cbm_Right_CrusI	rs10798461	1	176543287	A	T	0.371	-0.0395	0.0065	1.46e-09	0.501253	-	-	-	-
Cbm_Right_CrusI	rs115679612	1	231836387	A	G	0.0294	0.1097	0.0187	4.73e-09	0.438697	-	-	-	-
Cbm_Right_CrusI	rs17749164	1	231897207	T	C	0.5981	-0.0852	0.0064	5.75e-40	1	-0.0464	0.0062	7.1e-14	0.853608
Cbm_Right_CrusI	rs72758645	1	231904002	A	G	0.8964	0.0624	0.0103	1.46e-09	0.493775	-	-	-	-
Cbm_Right_CrusI	rs2793101	1	231904278	T	C	0.1081	-0.0671	0.0102	4.46e-11	0.693163	-	-	-	-
Cbm_Right_CrusI	rs9428576	1	243662027	T	C	0.5651	-0.0349	0.0064	3.9e-08	0.306439	-	-	-	-
Cbm_Right_CrusI	rs10929925	2	6155557	A	C	0.4305	-0.0352	0.0064	3.31e-08	0.319374	-	-	-	-
Cbm_Right_CrusI	rs2110944	2	37090233	T	C	0.4682	-0.0367	0.0064	7.64e-09	0.414224	-	-	-	-
Cbm_Right_CrusI	rs11681409	2	48492344	T	C	0.1164	-0.0545	0.0098	2.62e-08	0.32442	-	-	-	-
Cbm_Right_CrusI	rs77802918	2	59197366	T	C	0.1277	-0.0539	0.0096	1.77e-08	0.378584	-	-	-	-
Cbm_Right_CrusI	rs17642655	2	59500867	A	G	0.124	0.0594	0.0096	6.82e-10	0.557632	-	-	-	-
Cbm_Right_CrusI	rs12713596	2	67550323	A	T	0.6722	-0.0436	0.0068	1.36e-10	0.655186	-	-	-	-
Cbm_Right_CrusI	rs72971966	2	121605370	A	G	0.1403	-0.0559	0.0091	9.59e-10	0.539147	-	-	-	-
Cbm_Right_CrusI	rs11675340	2	121665196	A	G	0.2729	-0.0412	0.0072	9.41e-09	0.418653	-0.0395	0.0069	1.04e-08	0.336956
Cbm_Right_CrusI	rs7584742	2	144494683	A	T	0.1982	-0.0486	0.0085	1.03e-08	0.534615	-	-	-	-
Cbm_Right_CrusI	rs12464825	2	165394580	T	G	0.4272	-0.0452	0.0064	1.41e-12	0.826641	-0.0383	0.0061	4.3e-10	0.4858
Cbm_Right_CrusI	rs17195804	2	200123367	A	G	0.5498	-0.0406	0.0063	1.11e-10	0.626611	-	-	-	-
Cbm_Right_CrusI	rs7585392	2	200237383	T	C	0.1146	-0.0551	0.0099	2.5e-08	0.331976	-	-	-	-
Cbm_Right_CrusI	rs6714490	2	207907469	A	G	0.7376	-0.0641	0.0072	3.34e-19	0.995515	-0.0515	0.0069	7.6e-14	0.84703
Cbm_Right_CrusI	rs741475	2	208087139	T	C	0.5756	-0.0405	0.0064	2.26e-10	0.60675	-	-	-	-
Cbm_Right_CrusI	rs759661	2	208087929	A	T	0.6346	-	-	-	-	-0.0369	0.0063	3.97e-09	0.354404
Cbm_Right_CrusI	rs7578471	2	217750506	A	G	0.4507	0.0623	0.0063	8.32e-23	0.999681	0.0469	0.0061	1.3e-14	0.888856
Cbm_Right_CrusI	rs114794969	2	217839367	A	C	0.0327	-0.0994	0.0178	2.14e-08	0.345247	-	-	-	-
Cbm_Right_CrusI	rs2287288	2	217931406	A	G	0.6506	-0.0379	0.0067	1.31e-08	0.387378	-	-	-	-
Cbm_Right_CrusI	rs2234675	2	223085955	T	G	0.0423	-0.1574	0.0156	6.98e-24	0.999847	-0.1034	0.0151	6.59e-12	0.686045
Cbm_Right_CrusI	rs2600786	2	237614357	A	G	0.237	0.0526	0.0074	1.13e-12	0.82727	-	-	-	-
Cbm_Right_CrusI	rs1016584	3	89343169	T	C	0.4538	0.0412	0.0063	7.9e-11	0.659972	-	-	-	-
Cbm_Right_CrusI	rs11716850	3	134966964	T	C	0.1466	-0.0612	0.0089	5.98e-12	0.769481	-	-	-	-
Cbm_Right_CrusI	rs2172442	4	4762383	C	G	0.6799	0.0563	0.0068	9.12e-17	0.980252	0.0422	0.0065	9.77e-11	0.569999
Cbm_Right_CrusI	rs7691642	4	20685544	T	C	0.3943	-0.0363	0.0065	2.25e-08	0.351751	-0.0399	0.0062	1.5e-10	0.548807
Cbm_Right_CrusI	rs4865162	4	57767822	A	G	0.4246	-0.0568	0.0064	5.26e-19	0.995024	-	-	-	-
Cbm_Right_CrusI	rs781662	4	57780693	A	G	0.4254	-	-	-	-	-0.0567	0.0061	2.25e-20	0.994842
Cbm_Right_CrusI	rs34592089	4	102926923	A	G	0.0592	-	-	-	-	0.0765	0.0129	2.98e-09	0.382492
Cbm_Right_CrusI	rs1493683	4	121080457	C	G	0.1042	-	-	-	-	0.064	0.01	1.24e-10	0.554934
Cbm_Right_CrusI	rs1605761	4	121120419	T	C	0.1038	0.0791	0.0104	2.41e-14	0.925988	-	-	-	-
Cbm_Right_CrusI	rs56147303	4	121753650	T	C	0.1344	0.0525	0.0092	1.32e-08	0.369628	-	-	-	-
Cbm_Right_CrusI	rs2390103	4	121971213	T	C	0.1659	-	-	-	-	-0.0468	0.0081	7.82e-09	0.318192
Cbm_Right_CrusI	rs13151061	4	129524513	A	G	0.3239	-0.0397	0.0069	6.79e-09	0.444007	-	-	-	-
Cbm_Right_CrusI	rs72766851	5	66901981	T	C	0.1692	-0.0477	0.0084	1.42e-08	0.36718	-	-	-	-
Cbm_Right_CrusI	rs6889193	5	67452326	A	G	0.3805	-0.0407	0.0065	3.4e-10	0.578223	-	-	-	-
Cbm_Right_CrusI	rs415449	5	87527350	T	C	0.2636	-0.0417	0.0071	5.49e-09	0.420873	-	-	-	-
Cbm_Right_CrusI	rs17560514	5	88189025	A	G	0.2299	-0.0527	0.0075	2.32e-12	0.812764	-	-	-	-
Cbm_Right_CrusI	rs2920507	5	89419677	A	C	0.3102	0.0723	0.0068	2.99e-26	0.999981	0.0595	0.0066	1.12e-19	0.992196
Cbm_Right_CrusI	rs10793821	5	133836209	T	C	0.5681	-0.0436	0.0065	1.63e-11	0.765108	-	-	-	-
Cbm_Right_CrusI	rs2964566	5	151181407	A	T	0.5933	0.0373	0.0065	1.07e-08	0.415293	-	-	-	-
Cbm_Right_CrusI	rs7701020	5	158369272	A	T	0.6426	0.0475	0.0065	3.95e-13	0.854681	0.0373	0.0063	3.17e-09	0.366009
Cbm_Right_CrusI	rs62385438	5	158497639	T	C	0.6827	-0.0393	0.0067	5.36e-09	0.411814	-	-	-	-
Cbm_Right_CrusI	rs2964537	5	170732970	T	C	0.1943	-	-	-	-	0.0427	0.0077	2.86e-08	0.266873
Cbm_Right_CrusI	rs918472	5	170738836	A	G	0.717	-0.0391	0.007	2.62e-08	0.338372	-	-	-	-
Cbm_Right_CrusI	rs1577469	6	8462188	A	G	0.4972	0.0399	0.0063	1.7e-10	0.599304	-	-	-	-
Cbm_Right_CrusI	rs72831708	6	8730954	T	G	0.0626	0.1284	0.013	6e-23	0.999715	0.078	0.0125	4.74e-10	0.47998
Cbm_Right_CrusI	rs62404806	6	22419656	T	C	0.7934	-	-	-	-	0.0442	0.0075	3.56e-09	0.368365
Cbm_Right_CrusI	rs7749497	6	22473718	A	T	0.786	-0.0539	0.0079	1.07e-11	0.807434	-	-	-	-
Cbm_Right_CrusI	rs4711014	6	22491435	A	G	0.3278	-0.0591	0.0067	1.56e-18	0.993469	-	-	-	-
Cbm_Right_CrusI	rs6922448	6	22513914	A	G	0.5755	-	-	-	-	-0.0508	0.0061	1.4e-16	0.957986
Cbm_Right_CrusI	rs1342206	6	22593676	A	G	0.3575	-	-	-	-	0.0401	0.0064	2.68e-10	0.516759
Cbm_Right_CrusI	rs6899930	6	37111059	T	C	0.3385	-0.0418	0.0069	1.11e-09	0.580403	-	-	-	-
Cbm_Right_CrusI	rs79925073	6	98050838	A	C	0.0138	0.1647	0.0271	1.23e-09	0.516374	-	-	-	-
Cbm_Right_CrusI	rs9375711	6	99297389	A	T	0.3287	-0.0466	0.0068	9.18e-12	0.790078	-	-	-	-
Cbm_Right_CrusI	rs549632	6	100132370	T	G	0.805	0.0501	0.0079	2.56e-10	0.588204	-	-	-	-
Cbm_Right_CrusI	rs1040641	6	164241690	T	C	0.5651	-	-	-	-	-0.0347	0.0061	1.55e-08	0.296558
Cbm_Right_CrusI	rs9456885	6	164242262	T	G	0.5648	-0.0454	0.0064	1.1e-12	0.837376	-	-	-	-
Cbm_Right_CrusI	rs3779381	7	120966790	A	G	0.7375	-0.0453	0.0072	2.89e-10	0.597311	-	-	-	-
Cbm_Right_CrusI	rs78455662	7	132197784	T	C	0.0742	-0.1007	0.012	6.14e-17	0.981947	-0.0693	0.0116	2.25e-09	0.39639
Cbm_Right_CrusI	rs885736	7	132201777	T	C	0.4894	-0.0679	0.0063	3.1e-27	0.99999	-	-	-	-
Cbm_Right_CrusI	rs156977	7	132202277	C	G	0.668	-	-	-	-	-0.0451	0.0064	2.4e-12	0.732361
Cbm_Right_CrusI	rs7806862	7	132275850	A	C	0.6924	-0.0478	0.007	7.58e-12	0.803801	-	-	-	-
Cbm_Right_CrusI	rs1000293	7	132301953	A	G	0.4919	-	-	-	-	-0.0364	0.0061	2.11e-09	0.401414
Cbm_Right_CrusI	rs3757846	7	155249032	T	C	0.1565	-0.0499	0.0088	1.34e-08	0.393979	-	-	-	-
Cbm_Right_CrusI	rs4537191	7	156083152	T	C	0.5823	0.0379	0.0064	3.03e-09	0.45685	-	-	-	-
Cbm_Right_CrusI	rs4304216	7	156092669	A	T	0.4166	-	-	-	-	-0.0341	0.0062	3e-08	0.259182
Cbm_Right_CrusI	rs58357751	8	77595642	A	C	0.0609	0.1246	0.0132	5.39e-21	0.998933	0.0967	0.0127	3.21e-14	0.878066
Cbm_Right_CrusI	rs7826554	8	78651309	A	C	0.3457	0.0417	0.0067	3.69e-10	0.586277	-	-	-	-
Cbm_Right_CrusI	rs35807050	8	142040409	A	T	0.5864	0.0356	0.0064	2.9e-08	0.329981	-	-	-	-
Cbm_Right_CrusI	rs1567712	9	2660722	A	G	0.7712	0.0441	0.0075	4.11e-09	0.437974	-	-	-	-
Cbm_Right_CrusI	rs9802781	9	92086670	T	C	0.8101	-0.0448	0.0081	2.79e-08	0.334062	-	-	-	-
Cbm_Right_CrusI	rs10983068	9	118918479	T	C	0.6091	-	-	-	-	-0.0367	0.0063	4.76e-09	0.370096
Cbm_Right_CrusI	rs10217651	9	118923652	A	G	0.389	0.0568	0.0065	2.54e-18	0.993197	-	-	-	-
Cbm_Right_CrusI	rs72754248	9	119061396	A	G	0.0706	0.2074	0.0123	6.62e-64	1	0.1542	0.0118	8.54e-39	1
Cbm_Right_CrusI	rs72754249	9	119064017	T	C	0.9947	-0.2588	0.0433	2.25e-09	0.468142	-	-	-	-
Cbm_Right_CrusI	rs1885983	9	119078356	A	G	0.3422	-0.0462	0.0066	3.26e-12	0.792502	-	-	-	-
Cbm_Right_CrusI	rs10817872	9	119125449	A	T	0.6156	-0.0434	0.0065	2.87e-11	0.720428	-	-	-	-
Cbm_Right_CrusI	rs117674093	9	119242694	T	C	0.938	0.0834	0.013	1.46e-10	0.617182	-	-	-	-
Cbm_Right_CrusI	rs1861881	9	119312256	T	G	0.313	-0.0399	0.0068	4.52e-09	0.435444	-	-	-	-
Cbm_Right_CrusI	rs73655468	9	119434113	T	C	0.1423	-	-	-	-	-0.053	0.0087	9.29e-10	0.438216
Cbm_Right_CrusI	rs145680998	9	119435533	T	C	0.9844	-	-	-	-	0.1376	0.0244	1.62e-08	0.287038
Cbm_Right_CrusI	rs306549	9	135470176	C	G	0.2342	-0.0449	0.0074	1.66e-09	0.493685	-	-	-	-
Cbm_Right_CrusI	rs873418	10	89834396	T	C	0.7124	-0.0418	0.007	2.27e-09	0.4829	-	-	-	-
Cbm_Right_CrusI	rs72828403	10	122871128	A	G	0.9317	0.1136	0.0124	6.29e-20	0.996966	0.0731	0.012	9.82e-10	0.428473
Cbm_Right_CrusI	rs12362273	11	110022157	A	C	0.7635	-0.0444	0.0074	2.35e-09	0.476804	-	-	-	-
Cbm_Right_CrusI	rs10750497	11	131975079	C	G	0.2869	0.0469	0.007	1.75e-11	0.730112	-	-	-	-
Cbm_Right_CrusI	rs35872193	12	102442428	A	T	0.7931	-	-	-	-	-0.056	0.0075	1.03e-13	0.849732
Cbm_Right_CrusI	rs7973378	12	102483273	A	G	0.7568	-0.0449	0.0073	1.02e-09	0.521944	-	-	-	-
Cbm_Right_CrusI	rs79519967	12	102850462	T	G	0.9911	0.1945	0.0336	7.04e-09	0.40915	-	-	-	-
Cbm_Right_CrusI	rs4764702	12	102937106	A	G	0.8532	-	-	-	-	0.0636	0.0086	1.54e-13	0.836921
Cbm_Right_CrusI	rs76169231	12	102942969	T	C	0.7961	-	-	-	-	-0.0423	0.0075	1.62e-08	0.281244
Cbm_Right_CrusI	rs703545	12	102943000	A	G	0.1581	-0.0552	0.0087	2.51e-10	0.620073	-	-	-	-
Cbm_Right_CrusI	rs9645789	12	103925129	T	G	0.9517	-0.0929	0.0147	3.05e-10	0.595763	-0.0775	0.0142	4.91e-08	0.238427
Cbm_Right_CrusI	rs3924470	12	127299974	T	C	0.6545	0.0366	0.0067	4.45e-08	0.316853	-	-	-	-
Cbm_Right_CrusI	rs34423035	12	130319808	C	G	0.8764	-0.0626	0.0097	8.67e-11	0.669494	-	-	-	-
Cbm_Right_CrusI	rs116923630	13	27131971	T	C	0.1918	-	-	-	-	0.0496	0.0077	1.37e-10	0.553432
Cbm_Right_CrusI	rs539496	13	27137385	T	C	0.1924	0.0623	0.008	7.36e-15	0.941823	-	-	-	-
Cbm_Right_CrusI	rs696906	13	103612968	T	C	0.6322	-	-	-	-	-0.0382	0.0063	1.31e-09	0.426121
Cbm_Right_CrusI	rs696908	13	103618857	C	G	0.3735	0.0641	0.0065	9.13e-23	0.999684	-	-	-	-
Cbm_Right_CrusI	rs67359979	13	103668545	A	G	0.11	-0.0646	0.0101	1.68e-10	0.628085	-	-	-	-
Cbm_Right_CrusI	rs113676217	13	103684886	A	C	0.0335	0.1017	0.0177	9.1e-09	0.412761	-	-	-	-
Cbm_Right_CrusI	rs2806342	13	103911674	T	C	0.8051	-	-	-	-	0.0466	0.0077	1.21e-09	0.431432
Cbm_Right_CrusI	rs3005621	13	103928857	T	G	0.1879	-0.0918	0.0081	4.83e-30	0.999999	-	-	-	-
Cbm_Right_CrusI	rs1398586	13	104750688	A	C	0.1344	-0.0696	0.0093	5.54e-14	0.90922	-	-	-	-
Cbm_Right_CrusI	rs10148967	14	35283744	A	G	0.2229	0.0447	0.0076	3.63e-09	0.446908	-	-	-	-
Cbm_Right_CrusI	rs28463599	14	57320308	A	G	0.7647	0.0418	0.0074	1.98e-08	0.350815	-	-	-	-
Cbm_Right_CrusI	rs995526	14	57552534	A	G	0.2406	-0.0551	0.0073	6.74e-14	0.900162	-0.0419	0.0071	3.13e-09	0.369708
Cbm_Right_CrusI	rs7152276	14	57596579	C	G	0.3559	0.0374	0.0067	2.14e-08	0.369604	-	-	-	-
Cbm_Right_CrusI	rs117332043	14	57617154	T	C	0.0681	-	-	-	-	-0.1516	0.012	2.35e-36	1
Cbm_Right_CrusI	rs76350445	14	57623935	T	C	0.0679	-0.1903	0.0125	6.23e-52	1	-	-	-	-
Cbm_Right_CrusI	rs10137379	14	57674867	T	C	0.859	0.0783	0.009	2.86e-18	0.990388	-	-	-	-
Cbm_Right_CrusI	rs79191875	14	57684250	T	C	0.8591	-	-	-	-	0.0664	0.0087	1.67e-14	0.875649
Cbm_Right_CrusI	rs534727641	14	57811350	A	G	0.0076	-0.2098	0.0363	7.57e-09	0.40394	-	-	-	-
Cbm_Right_CrusI	rs62650186	14	69140240	T	C	0.4992	-0.0374	0.0064	4.78e-09	0.457808	-	-	-	-
Cbm_Right_CrusI	rs146688500	14	69177932	A	G	0.9849	0.1416	0.026	4.97e-08	0.303111	-	-	-	-
Cbm_Right_CrusI	rs75120172	14	69189196	T	C	0.9611	-0.0962	0.0162	2.76e-09	0.446585	-	-	-	-
Cbm_Right_CrusI	rs194772	14	69201003	A	G	0.485	0.0361	0.0064	1.47e-08	0.384303	-	-	-	-
Cbm_Right_CrusI	rs754945	14	69234067	A	G	0.125	-0.0741	0.0095	7.27e-15	0.940089	-	-	-	-
Cbm_Right_CrusI	rs927292	14	69258841	C	G	0.3227	-0.0487	0.0067	4.45e-13	0.854947	-	-	-	-
Cbm_Right_CrusI	rs2295751	14	69259461	C	G	0.1209	-	-	-	-	-0.0601	0.0093	1.17e-10	0.557873
Cbm_Right_CrusI	rs1547050	14	69274950	T	C	0.3124	0.098	0.0068	6.57e-47	1	0.0758	0.0066	6.19e-31	0.999998
Cbm_Right_CrusI	rs10129303	14	86315004	A	T	0.3808	0.0544	0.0067	5.63e-16	0.982233	-	-	-	-
Cbm_Right_CrusI	rs57919607	14	99750235	A	G	0.1251	0.0623	0.0096	7.49e-11	0.670287	-	-	-	-
Cbm_Right_CrusI	rs8035136	15	47977010	A	G	0.6596	0.0492	0.0068	3.38e-13	0.887624	-	-	-	-
Cbm_Right_CrusI	rs1061278	15	58246029	T	C	0.4527	0.0356	0.0064	2.21e-08	0.349669	-	-	-	-
Cbm_Right_CrusI	rs8028912	15	67876277	A	G	0.9143	-0.1571	0.0113	3.49e-44	1	-	-	-	-
Cbm_Right_CrusI	rs61414248	15	67913398	A	T	0.0853	-	-	-	-	0.1028	0.0109	4.35e-21	0.997116
Cbm_Right_CrusI	rs188266808	15	68279295	A	T	0.9762	-0.1467	0.0207	1.4e-12	0.826764	-0.1166	0.0199	4.73e-09	0.355261
Cbm_Right_CrusI	rs9920297	15	69955716	T	C	0.6415	-0.0383	0.0066	7.62e-09	0.420286	-	-	-	-
Cbm_Right_CrusI	rs2356265	16	49450047	A	G	0.7656	-	-	-	-	0.0528	0.0072	2.56e-13	0.826995
Cbm_Right_CrusI	rs62029124	16	49481891	T	C	0.2297	-0.069	0.0075	2.94e-20	0.997809	-	-	-	-
Cbm_Right_CrusI	rs12950141	17	13726107	A	T	0.2378	-0.0445	0.0075	2.93e-09	0.485723	-	-	-	-
Cbm_Right_CrusI	rs117974417	17	46156510	C	G	0.8491	-	-	-	-	0.0483	0.0085	1.21e-08	0.30425
Cbm_Right_CrusI	rs72833096	17	55655932	C	G	0.1536	0.0501	0.0088	1.16e-08	0.386756	-	-	-	-
Cbm_Right_CrusI	rs12960444	18	44607314	T	C	0.5436	-0.0474	0.0063	6.71e-14	0.903009	-	-	-	-
Cbm_Right_CrusI	rs78229985	18	44820823	T	C	0.9933	0.2736	0.0388	1.67e-12	0.823753	0.2177	0.0372	4.76e-09	0.353866
Cbm_Right_CrusI	rs7226920	18	72962473	T	C	0.2182	-	-	-	-	-0.0424	0.0074	8.13e-09	0.328507
Cbm_Right_CrusI	rs4891253	18	72980165	A	G	0.7785	0.0444	0.0076	4.73e-09	0.428155	-	-	-	-
Cbm_Right_CrusI	rs4891263	18	73017428	C	G	0.6633	0.0919	0.0067	7.32e-43	1	-	-	-	-
Cbm_Right_CrusI	rs76003347	18	73019052	A	G	0.3366	-	-	-	-	-0.0696	0.0064	3.5e-27	0.999962
Cbm_Right_CrusI	rs11662328	18	73078036	A	C	0.1892	0.0465	0.008	6.62e-09	0.403079	-	-	-	-
Cbm_Right_CrusI	rs66500423	19	41195170	T	C	0.6878	0.0443	0.0068	8.78e-11	0.661684	-	-	-	-
Cbm_Right_CrusI	rs557987931	19	50094428	C	G	0.9538	0.0868	0.015	7.01e-09	0.404003	-	-	-	-
Cbm_Right_CrusI	rs6134221	20	11345473	A	G	0.7423	-0.0407	0.0073	2.11e-08	0.358254	-	-	-	-
Cbm_Right_CrusI	rs8127603	21	33886658	T	C	0.7261	-0.0532	0.0071	5.06e-14	0.90855	-	-	-	-
Cbm_Right_CrusI	rs16984654	22	27832985	C	G	0.7578	0.0436	0.0074	3.33e-09	0.455415	-	-	-	-
Cbm_Right_CrusI	rs5934887	X	10335595	A	T	0.3421	0.0331	0.0055	1.9e-09	0.167753	-	-	-	-
Cbm_Left_CrusII	rs637168	1	23294671	A	G	0.164	-	-	-	-	-0.0502	0.0086	6.44e-09	0.446136
Cbm_Left_CrusII	rs6658111	1	47980916	T	G	0.6352	-	-	-	-	0.0404	0.0067	1.99e-09	0.543726
Cbm_Left_CrusII	rs6656199	1	51539890	T	C	0.8888	-0.0577	0.0104	3.23e-08	0.395036	-	-	-	-
Cbm_Left_CrusII	rs72906148	1	51763879	T	G	0.0561	-	-	-	-	0.0883	0.014	2.79e-10	0.639545
Cbm_Left_CrusII	rs4623641	1	53751610	T	C	0.3735	0.0374	0.0068	3.43e-08	0.38975	-	-	-	-
Cbm_Left_CrusII	rs4147825	1	94560938	A	G	0.3639	-0.0393	0.007	1.62e-08	0.481478	-	-	-	-
Cbm_Left_CrusII	rs6667007	1	165313682	T	G	0.2183	0.0454	0.008	1.29e-08	0.463987	-	-	-	-
Cbm_Left_CrusII	rs34263105	1	227459063	T	C	0.8584	-0.0592	0.0094	2.89e-10	0.673244	-	-	-	-
Cbm_Left_CrusII	rs17749164	1	231897207	T	C	0.5981	0.0506	0.0067	4.08e-14	0.949702	0.0373	0.0066	1.67e-08	0.411236
Cbm_Left_CrusII	rs890074	2	12910084	A	G	0.4841	0.0373	0.0066	1.59e-08	0.451073	-	-	-	-
Cbm_Left_CrusII	rs10929405	2	16135423	T	C	0.5731	-0.0364	0.0066	4.16e-08	0.380219	-	-	-	-
Cbm_Left_CrusII	rs9287666	2	16136922	T	C	0.4216	-	-	-	-	0.0359	0.0065	3.89e-08	0.350374
Cbm_Left_CrusII	rs55795022	2	16386265	A	T	0.171	-0.0572	0.0099	7.27e-09	0.759753	-	-	-	-
Cbm_Left_CrusII	rs6546293	2	67543559	T	C	0.3268	-	-	-	-	-0.0527	0.007	6.74e-14	0.946683
Cbm_Left_CrusII	rs112898427	2	67561335	T	C	0.7012	0.0697	0.0074	2.51e-21	0.999881	-	-	-	-
Cbm_Left_CrusII	rs4293578	2	102234881	T	C	0.6258	0.0403	0.0068	2.46e-09	0.54911	-	-	-	-
Cbm_Left_CrusII	rs4613306	2	102305078	A	C	0.7142	0.0457	0.0073	3.41e-10	0.674024	-	-	-	-
Cbm_Left_CrusII	rs726857	2	145753424	A	T	0.3651	-0.0418	0.0073	1.27e-08	0.618555	-	-	-	-
Cbm_Left_CrusII	rs6714490	2	207907469	A	G	0.7376	0.0502	0.0074	1.36e-11	0.805793	0.0422	0.0073	8.64e-09	0.441801
Cbm_Left_CrusII	rs2360675	2	208059640	A	C	0.5549	-	-	-	-	0.0425	0.0065	7.54e-11	0.721247
Cbm_Left_CrusII	rs6739830	2	208082651	A	G	0.4119	-0.0542	0.0067	5.6e-16	0.98525	-	-	-	-
Cbm_Left_CrusII	rs2234675	2	223085955	T	G	0.0423	-0.1205	0.0162	1.1e-13	0.930979	-0.0974	0.016	1.25e-09	0.55565
Cbm_Left_CrusII	rs10196267	2	237630295	A	G	0.5803	0.0401	0.0067	1.7e-09	0.581522	-	-	-	-
Cbm_Left_CrusII	rs6551410	3	89442305	A	T	0.4125	-0.0374	0.0068	3.43e-08	0.425245	-	-	-	-
Cbm_Left_CrusII	rs71614994	4	2400810	A	G	0.1628	0.049	0.009	4.85e-08	0.389569	-	-	-	-
Cbm_Left_CrusII	rs4689933	4	4761140	T	C	0.6801	0.0463	0.0071	5.42e-11	0.765038	-	-	-	-
Cbm_Left_CrusII	rs781550	4	57729256	A	G	0.0904	0.0659	0.0114	8.46e-09	0.480231	-	-	-	-
Cbm_Left_CrusII	rs9996538	4	57742166	T	C	0.6522	-	-	-	-	-0.0415	0.0069	1.57e-09	0.578788
Cbm_Left_CrusII	rs4865165	4	57765546	T	C	0.4987	0.0635	0.0065	2.91e-22	0.999858	-	-	-	-
Cbm_Left_CrusII	rs17218035	4	58930432	A	G	0.5647	0.0396	0.0066	1.86e-09	0.563992	0.0402	0.0065	5.9e-10	0.597353
Cbm_Left_CrusII	rs2199936	4	89045331	A	G	0.1145	-	-	-	-	-0.0604	0.0101	2.11e-09	0.518485
Cbm_Left_CrusII	rs4393969	4	94797500	T	C	0.3447	-	-	-	-	0.042	0.0069	9.61e-10	0.600442
Cbm_Left_CrusII	rs7698314	4	94807772	T	C	0.639	-0.038	0.0069	3.69e-08	0.407348	-	-	-	-
Cbm_Left_CrusII	rs2716001	4	121176082	A	G	0.1372	-0.0526	0.0095	3.5e-08	0.390392	-	-	-	-
Cbm_Left_CrusII	rs72731840	4	147535490	A	C	0.7845	0.0805	0.008	4.62e-24	0.999971	0.0598	0.0078	2.47e-14	0.94309
Cbm_Left_CrusII	rs55974445	4	147893585	T	G	0.7121	0.0523	0.0072	4.61e-13	0.906445	0.0405	0.0071	1.3e-08	0.417003
Cbm_Left_CrusII	rs11743996	5	53498407	A	G	0.2084	-0.0464	0.0081	8.47e-09	0.474413	-	-	-	-
Cbm_Left_CrusII	rs12188596	5	67492833	A	G	0.9069	-0.0665	0.0113	4.21e-09	0.528812	-	-	-	-
Cbm_Left_CrusII	rs10478102	5	112398770	T	C	0.3594	-	-	-	-	-0.0405	0.0068	2.23e-09	0.541701
Cbm_Left_CrusII	rs329124	5	133865452	A	G	0.5747	0.041	0.0066	6.28e-10	0.634263	-	-	-	-
Cbm_Left_CrusII	rs4711000	6	22099484	T	C	0.5504	0.0449	0.0066	9.21e-12	0.824912	0.0435	0.0065	2.18e-11	0.768701
Cbm_Left_CrusII	rs6922448	6	22513914	A	G	0.5755	0.0389	0.0066	4.17e-09	0.517865	-	-	-	-
Cbm_Left_CrusII	rs1026149	6	45753819	A	T	0.7478	0.0472	0.0076	4.77e-10	0.658496	-	-	-	-
Cbm_Left_CrusII	rs7769624	6	148535313	A	C	0.428	-	-	-	-	-0.0377	0.0065	8.36e-09	0.452542
Cbm_Left_CrusII	rs11762724	7	25716975	T	C	0.7757	-0.0438	0.0078	2.36e-08	0.409441	-	-	-	-
Cbm_Left_CrusII	rs12705139	7	103321474	C	G	0.472	-0.036	0.0066	4.15e-08	0.376663	-	-	-	-
Cbm_Left_CrusII	rs34041659	7	103373126	T	C	0.8413	0.0664	0.009	1.57e-13	0.931318	-	-	-	-
Cbm_Left_CrusII	rs11979177	7	103387890	A	G	0.0684	0.0715	0.0131	4.4e-08	0.385062	0.0742	0.0129	8.44e-09	0.46126
Cbm_Left_CrusII	rs10242100	7	120983343	A	G	0.7185	-0.065	0.0073	5e-19	0.998187	-	-	-	-
Cbm_Left_CrusII	rs4304216	7	156092669	A	T	0.4167	-0.0459	0.0066	4.87e-12	0.845726	-0.0459	0.0066	2.67e-12	0.845831
Cbm_Left_CrusII	rs13224561	7	156161063	A	G	0.5317	-0.048	0.0067	8.44e-13	0.91876	-0.0433	0.0066	6.02e-11	0.765902
Cbm_Left_CrusII	rs2921096	8	8284650	T	C	0.4595	-	-	-	-	0.0387	0.0065	2.74e-09	0.52471
Cbm_Left_CrusII	rs2929451	8	9085295	A	T	0.486	-	-	-	-	-0.0392	0.0065	1.23e-09	0.559357
Cbm_Left_CrusII	rs10105843	8	10197863	A	G	0.5793	-	-	-	-	0.0408	0.0066	6.97e-10	0.620391
Cbm_Left_CrusII	rs10101292	8	10856474	T	C	0.5708	-	-	-	-	-0.0418	0.0066	1.96e-10	0.678444
Cbm_Left_CrusII	rs2245250	8	11400680	A	G	0.503	-	-	-	-	0.0418	0.0065	9.03e-11	0.699627
Cbm_Left_CrusII	rs12545696	8	25919776	T	C	0.8626	0.0542	0.0095	1.01e-08	0.453205	-	-	-	-
Cbm_Left_CrusII	rs9693928	8	78801789	T	G	0.3229	-0.0488	0.007	3.71e-12	0.858214	-	-	-	-
Cbm_Left_CrusII	rs13268108	8	142039586	T	C	0.6092	0.0371	0.0068	4.98e-08	0.39091	0.0421	0.0067	3.55e-10	0.663305
Cbm_Left_CrusII	rs7874933	9	2622554	T	C	0.1848	0.0583	0.0087	2.24e-11	0.845659	0.0564	0.0086	5.22e-11	0.790907
Cbm_Left_CrusII	rs10961628	9	14633286	A	G	0.4331	0.0417	0.0066	2.43e-10	0.675622	-	-	-	-
Cbm_Left_CrusII	rs11141899	9	90186976	A	G	0.7617	0.0423	0.0077	3.83e-08	0.382094	-	-	-	-
Cbm_Left_CrusII	rs10217305	9	118923442	C	G	0.6327	-0.0428	0.0068	3.78e-10	0.672533	-	-	-	-
Cbm_Left_CrusII	rs72754248	9	119061396	A	G	0.0706	0.1941	0.0128	3.26e-52	1	0.1842	0.0126	2.49e-48	1
Cbm_Left_CrusII	rs34278882	9	119257528	T	G	0.7601	0.0513	0.0077	2.11e-11	0.791421	0.0586	0.0076	8.12e-15	0.955771
Cbm_Left_CrusII	rs12341080	9	119325482	A	G	0.3262	-	-	-	-	0.0397	0.0069	9.06e-09	0.447363
Cbm_Left_CrusII	rs1678612	10	73859389	A	C	0.4527	0.0459	0.0066	2.94e-12	0.860065	-	-	-	-
Cbm_Left_CrusII	rs11202604	10	89709901	T	C	0.1314	-0.0613	0.0098	3.86e-10	0.680433	-	-	-	-
Cbm_Left_CrusII	rs873418	10	89834396	T	C	0.7124	-	-	-	-	0.0425	0.0072	2.78e-09	0.519729
Cbm_Left_CrusII	rs2296587	10	104245588	A	G	0.3259	-	-	-	-	-0.0415	0.0069	1.83e-09	0.543754
Cbm_Left_CrusII	rs12768479	10	104278276	A	G	0.5429	0.0383	0.0066	7.69e-09	0.501027	-	-	-	-
Cbm_Left_CrusII	rs78640054	10	122841052	A	G	0.0648	0.1161	0.0133	3.26e-18	0.996758	0.1101	0.0132	6e-17	0.98941
Cbm_Left_CrusII	rs2248168	10	122853969	T	G	0.0868	-0.0791	0.0125	2.28e-10	0.820021	-	-	-	-
Cbm_Left_CrusII	rs2060157	11	8971829	A	G	0.7324	-0.0423	0.0074	1.03e-08	0.460824	-	-	-	-
Cbm_Left_CrusII	rs1567244	11	31064256	T	C	0.0169	-	-	-	-	-0.1846	0.0252	2.22e-13	0.908553
Cbm_Left_CrusII	rs113315888	11	31269153	T	C	0.984	0.1673	0.0262	1.63e-10	0.708756	-	-	-	-
Cbm_Left_CrusII	rs2210143	11	31300793	T	G	0.6792	-0.0417	0.007	2.96e-09	0.544928	-	-	-	-
Cbm_Left_CrusII	rs144965273	11	31675459	A	C	0.9837	-	-	-	-	0.1732	0.0256	1.33e-11	0.79351
Cbm_Left_CrusII	rs493601	11	31783582	T	C	0.9819	0.1378	0.0246	2.26e-08	0.420667	-	-	-	-
Cbm_Left_CrusII	rs569505	11	95730342	A	T	0.4936	-0.0361	0.0066	4.4e-08	0.385029	-	-	-	-
Cbm_Left_CrusII	rs741671	12	92977199	A	T	0.7823	-	-	-	-	0.0463	0.0079	3.8e-09	0.504923
Cbm_Left_CrusII	rs11111094	12	102328806	A	C	0.4776	-0.0379	0.0066	7.88e-09	0.484094	-0.045	0.0065	3.65e-12	0.835174
Cbm_Left_CrusII	rs35872193	12	102442428	A	T	0.7931	-0.0463	0.0081	1.25e-08	0.464097	-0.0653	0.008	4.02e-16	0.982681
Cbm_Left_CrusII	rs703545	12	102943000	A	G	0.1581	-0.0609	0.0091	1.81e-11	0.816127	-0.0705	0.0089	3.08e-15	0.971372
Cbm_Left_CrusII	rs696170	13	103614606	T	C	0.3733	-0.0689	0.0068	2.71e-24	0.999978	-0.056	0.0067	5.09e-17	0.989086
Cbm_Left_CrusII	rs73587128	13	104754204	A	G	0.8805	-0.0797	0.0101	3.86e-15	0.973872	-0.0712	0.01	1.08e-12	0.874791
Cbm_Left_CrusII	rs35660835	14	57318263	A	C	0.7853	-0.0565	0.008	1.65e-12	0.881304	-0.0506	0.0079	1.45e-10	0.68803
Cbm_Left_CrusII	rs12892713	14	57574554	A	G	0.2993	-0.0634	0.0072	9.29e-19	0.997829	-0.0416	0.0071	3.99e-09	0.497762
Cbm_Left_CrusII	rs117332043	14	57617154	T	C	0.0681	0.2021	0.013	2.23e-54	1	0.1789	0.0128	2.88e-44	1
Cbm_Left_CrusII	rs7155721	14	57697430	A	C	0.8585	-	-	-	-	-0.0534	0.0092	5.98e-09	0.447823
Cbm_Left_CrusII	rs75903588	14	57709152	T	C	0.0799	0.0819	0.012	1.06e-11	0.815196	-	-	-	-
Cbm_Left_CrusII	rs534727641	14	57811350	A	G	0.0076	0.2267	0.0377	1.84e-09	0.570121	-	-	-	-
Cbm_Left_CrusII	rs1957796	14	86283548	T	C	0.3806	-0.0431	0.0067	1.64e-10	0.7023	-0.0376	0.0067	1.58e-08	0.407807
Cbm_Left_CrusII	rs7141044	14	99716908	T	C	0.4968	-	-	-	-	-0.037	0.0065	1.18e-08	0.435148
Cbm_Left_CrusII	rs1540840	14	99733384	C	G	0.4823	0.0429	0.0072	2.31e-09	0.750785	-	-	-	-
Cbm_Left_CrusII	rs1405238	14	99733954	T	C	0.5794	-	-	-	-	-0.055	0.0069	1.14e-15	0.989653
Cbm_Left_CrusII	rs10131783	14	99740208	A	G	0.1284	-0.0758	0.0097	6.89e-15	0.964013	-	-	-	-
Cbm_Left_CrusII	rs1441819	15	58243204	A	G	0.4456	0.0454	0.0066	7.35e-12	0.841333	-	-	-	-
Cbm_Left_CrusII	rs1587706	15	82318245	A	G	0.2915	-0.0422	0.0072	4.56e-09	0.512271	-	-	-	-
Cbm_Left_CrusII	rs1969091	15	82326775	A	C	0.2883	-	-	-	-	-0.0406	0.0072	1.45e-08	0.422065
Cbm_Left_CrusII	rs9922288	16	24550930	A	G	0.2283	0.0452	0.0079	1.32e-08	0.488786	-	-	-	-
Cbm_Left_CrusII	rs1971374	17	43659738	T	C	0.7919	0.0546	0.008	1.04e-11	0.812017	-	-	-	-
Cbm_Left_CrusII	rs112972619	17	43776425	T	C	0.217	-	-	-	-	-0.0703	0.0078	3.3e-19	0.997686
Cbm_Left_CrusII	rs2532387	17	44313522	T	G	0.2112	-	-	-	-	-0.0723	0.0079	8.86e-20	0.998578
Cbm_Left_CrusII	rs2696551	17	44349234	T	C	0.1784	-0.0607	0.009	1.19e-11	0.883519	-	-	-	-
Cbm_Left_CrusII	rs9912530	17	44836302	T	C	0.2701	-	-	-	-	-0.0614	0.0073	3.57e-17	0.990431
Cbm_Left_CrusII	rs916888	17	44863133	T	C	0.7549	0.0477	0.0076	2.83e-10	0.660613	-	-	-	-
Cbm_Left_CrusII	rs4793497	17	68651481	A	G	0.765	0.0565	0.0078	6.22e-13	0.918941	-	-	-	-
Cbm_Left_CrusII	rs13381941	18	19154143	A	G	0.3414	-0.0416	0.0069	1.34e-09	0.57437	-	-	-	-
Cbm_Left_CrusII	rs4891262	18	73017380	T	C	0.3511	0.0876	0.0069	2.68e-37	1	0.0624	0.0068	3.29e-20	0.998921
Cbm_Left_CrusII	rs17056851	18	73062920	A	G	0.2196	-0.0482	0.0079	8.3e-10	0.599739	-	-	-	-
Cbm_Left_CrusII	rs6079584	20	14840502	A	C	0.5777	0.0515	0.0066	7.7e-15	0.965774	0.0477	0.0065	2.96e-13	0.900632
Cbm_Left_CrusII	rs3788649	22	45734860	T	C	0.729	-0.0443	0.0075	4.22e-09	0.570378	-	-	-	-
Cbm_Right_CrusII	rs6658111	1	47980916	T	G	0.6352	-	-	-	-	0.0372	0.0067	2.89e-08	0.370339
Cbm_Right_CrusII	rs12076395	1	51568124	A	G	0.9463	-	-	-	-	-0.0819	0.0142	8.88e-09	0.429131
Cbm_Right_CrusII	rs4623641	1	53751610	T	C	0.3735	0.0388	0.0067	6.82e-09	0.465631	-	-	-	-
Cbm_Right_CrusII	rs73102307	1	227507046	T	C	0.1379	0.0538	0.0094	1.08e-08	0.44083	-	-	-	-
Cbm_Right_CrusII	rs17749164	1	231897207	T	C	0.5981	0.069	0.0066	1.84e-25	0.999988	0.0385	0.0066	4.51e-09	0.477724
Cbm_Right_CrusII	rs890074	2	12910084	A	G	0.4841	0.0364	0.0065	2.46e-08	0.400674	-	-	-	-
Cbm_Right_CrusII	rs10929405	2	16135423	T	C	0.5731	-0.0466	0.0066	1.4e-12	0.872562	-0.0399	0.0065	9.21e-10	0.575334
Cbm_Right_CrusII	rs55795022	2	16386265	A	T	0.171	-0.0574	0.0098	4.35e-09	0.766404	-0.0532	0.0097	4.02e-08	0.60972
Cbm_Right_CrusII	rs6546293	2	67543559	T	C	0.3268	-	-	-	-	-0.0621	0.007	7.38e-19	0.997984
Cbm_Right_CrusII	rs112898427	2	67561335	T	C	0.7012	0.0796	0.0073	6.58e-28	1	-	-	-	-
Cbm_Right_CrusII	rs2683687	2	67758663	A	G	0.6724	-0.0426	0.0069	7.17e-10	0.604174	-	-	-	-
Cbm_Right_CrusII	rs60401572	2	200126591	A	G	0.9484	-0.0878	0.0146	1.73e-09	0.540167	-	-	-	-
Cbm_Right_CrusII	rs6714490	2	207907469	A	G	0.7376	0.0437	0.0074	2.73e-09	0.517677	-	-	-	-
Cbm_Right_CrusII	rs1076492	2	208081780	T	C	0.5803	-	-	-	-	0.041	0.0065	3.38e-10	0.630235
Cbm_Right_CrusII	rs6739830	2	208082651	A	G	0.4119	-0.0523	0.0066	2.68e-15	0.971867	-	-	-	-
Cbm_Right_CrusII	rs7606095	2	217843792	T	C	0.0324	-	-	-	-	-0.1004	0.0182	3.34e-08	0.355687
Cbm_Right_CrusII	rs55794411	2	217865922	T	C	0.9661	0.1081	0.0179	1.66e-09	0.55604	-	-	-	-
Cbm_Right_CrusII	rs2234675	2	223085955	T	G	0.0423	-0.1326	0.016	1.41e-16	0.985386	-0.1006	0.016	2.9e-10	0.626953
Cbm_Right_CrusII	rs16863647	2	223145477	C	G	0.2494	-0.0469	0.0075	3.92e-10	0.636638	-0.0414	0.0074	2.54e-08	0.370489
Cbm_Right_CrusII	rs10196267	2	237630295	A	G	0.5803	0.0442	0.0066	1.87e-11	0.783691	-	-	-	-
Cbm_Right_CrusII	rs144848844	3	89400269	A	C	0.5728	0.0436	0.0069	2.27e-10	0.762536	-	-	-	-
Cbm_Right_CrusII	rs2198951	3	90460470	C	G	0.4937	-0.0396	0.0066	1.83e-09	0.582492	-	-	-	-
Cbm_Right_CrusII	rs11921710	3	105565615	A	G	0.2066	-0.0458	0.008	1.14e-08	0.440027	-	-	-	-
Cbm_Right_CrusII	rs4689933	4	4761140	T	C	0.6801	0.0508	0.007	3.48e-13	0.907133	0.0419	0.0069	1.54e-09	0.554039
Cbm_Right_CrusII	rs781550	4	57729256	A	G	0.0904	0.0728	0.0113	1.25e-10	0.69724	-	-	-	-
Cbm_Right_CrusII	rs4865165	4	57765546	T	C	0.4987	0.0575	0.0065	5.84e-19	0.997203	0.0395	0.0064	7.57e-10	0.577068
Cbm_Right_CrusII	rs270231	4	58932326	T	C	0.5449	-	-	-	-	0.0353	0.0064	4.14e-08	0.334906
Cbm_Right_CrusII	rs201180888	4	121174636	A	G	0.1367	-0.0534	0.0094	1.6e-08	0.417758	-	-	-	-
Cbm_Right_CrusII	rs72731840	4	147535490	A	C	0.7845	0.0671	0.0079	1.52e-17	0.992622	0.0556	0.0078	1.03e-12	0.861435
Cbm_Right_CrusII	rs435713	5	52903804	A	C	0.278	-	-	-	-	0.0412	0.0071	8.19e-09	0.430489
Cbm_Right_CrusII	rs3843452	5	53497981	T	C	0.38	-0.0368	0.0067	4.21e-08	0.364827	-	-	-	-
Cbm_Right_CrusII	rs12188596	5	67492833	A	G	0.9069	-0.062	0.0112	3.05e-08	0.381424	-	-	-	-
Cbm_Right_CrusII	rs6898297	5	112417183	A	G	0.6285	-	-	-	-	0.0444	0.0067	2.62e-11	0.752822
Cbm_Right_CrusII	rs80332088	5	130529667	A	G	0.8718	0.0529	0.0097	4.72e-08	0.345965	-	-	-	-
Cbm_Right_CrusII	rs4706009	5	130536044	A	C	0.1358	-	-	-	-	-0.0537	0.0094	1.06e-08	0.422914
Cbm_Right_CrusII	rs4711000	6	22099484	T	C	0.5504	0.049	0.0065	5.29e-14	0.935493	0.0466	0.0065	5.53e-13	0.880176
Cbm_Right_CrusII	rs6922448	6	22513914	A	G	0.5755	0.0433	0.0066	3.97e-11	0.747615	0.0391	0.0065	1.87e-09	0.528991
Cbm_Right_CrusII	rs2820234	6	35002013	A	C	0.5201	0.0409	0.0065	3.43e-10	0.651715	-	-	-	-
Cbm_Right_CrusII	rs2820224	6	35009578	C	G	0.5883	-	-	-	-	-0.0437	0.0065	2e-11	0.757448
Cbm_Right_CrusII	rs626065	7	103371039	A	T	0.454	-0.0531	0.0065	3.52e-16	0.982502	-	-	-	-
Cbm_Right_CrusII	rs496535	7	103371839	C	G	0.454	-	-	-	-	-0.0452	0.0065	2.93e-12	0.837007
Cbm_Right_CrusII	rs201874085	7	103386910	T	C	0.9219	-0.0762	0.0124	7.7e-10	0.653109	-	-	-	-
Cbm_Right_CrusII	rs11979177	7	103387890	A	G	0.0684	-	-	-	-	0.081	0.0128	2.58e-10	0.653136
Cbm_Right_CrusII	rs10242100	7	120983343	A	G	0.7185	-0.056	0.0072	9.03e-15	0.959924	-	-	-	-
Cbm_Right_CrusII	rs11505249	7	156082550	A	G	0.5252	-0.0534	0.0065	2.58e-16	0.985143	-	-	-	-
Cbm_Right_CrusII	rs4304216	7	156092669	A	T	0.4167	-	-	-	-	-0.0489	0.0065	6.57e-14	0.925359
Cbm_Right_CrusII	rs36071136	7	156166303	C	G	0.5747	-0.0474	0.0066	4.76e-13	0.894093	-0.0466	0.0065	7.96e-13	0.871853
Cbm_Right_CrusII	rs62482611	7	156257004	A	T	0.908	0.0661	0.0115	8.54e-09	0.503906	-	-	-	-
Cbm_Right_CrusII	rs2980439	8	8094870	A	G	0.4654	-	-	-	-	-0.0417	0.0065	9.95e-11	0.689669
Cbm_Right_CrusII	rs2921378	8	8914812	C	G	0.5345	-	-	-	-	0.0449	0.0065	5.57e-12	0.829365
Cbm_Right_CrusII	rs7831557	8	10280228	A	G	0.5196	-	-	-	-	0.0426	0.0065	4.23e-11	0.7367
Cbm_Right_CrusII	rs2572397	8	11176403	A	G	0.4454	-	-	-	-	-0.0478	0.0064	1.15e-13	0.910074
Cbm_Right_CrusII	rs4841600	8	11688148	T	C	0.4572	-	-	-	-	0.043	0.0065	3e-11	0.749311
Cbm_Right_CrusII	rs1914929	8	78651049	A	G	0.3461	-0.0517	0.0068	3.88e-14	0.943052	-	-	-	-
Cbm_Right_CrusII	rs7834152	8	142042870	T	C	0.5858	0.0405	0.0066	1.02e-09	0.599297	0.0424	0.0066	1.16e-10	0.69837
Cbm_Right_CrusII	rs7874933	9	2622554	T	C	0.1848	0.0546	0.0086	2.46e-10	0.728087	0.0496	0.0085	6.5e-09	0.521578
Cbm_Right_CrusII	rs10810192	9	14631417	T	C	0.5663	-0.0413	0.0065	2.45e-10	0.655324	-	-	-	-
Cbm_Right_CrusII	rs10981907	9	98520083	A	G	0.28	-0.0433	0.0072	2.25e-09	0.542291	-	-	-	-
Cbm_Right_CrusII	rs2672813	9	98781179	A	G	0.4397	0.0417	0.0065	1.55e-10	0.679245	-	-	-	-
Cbm_Right_CrusII	rs10217305	9	118923442	C	G	0.6327	-0.0516	0.0068	2.2e-14	0.951644	-	-	-	-
Cbm_Right_CrusII	rs72754248	9	119061396	A	G	0.0706	0.1567	0.0126	2.53e-35	1	0.156	0.0125	1.79e-35	1
Cbm_Right_CrusII	rs34278882	9	119257528	T	G	0.7601	0.0486	0.0076	1.41e-10	0.684904	0.056	0.0075	9.49e-14	0.917091
Cbm_Right_CrusII	rs1467554	9	119331057	T	C	0.3273	-	-	-	-	0.0401	0.0068	4.43e-09	0.470494
Cbm_Right_CrusII	rs9421819	10	48482576	C	G	0.7942	-	-	-	-	-0.0484	0.008	1.14e-09	0.55653
Cbm_Right_CrusII	rs4922553	10	48488242	T	C	0.1934	0.0533	0.0082	9.08e-11	0.714577	-	-	-	-
Cbm_Right_CrusII	rs11204286	10	48633035	C	G	0.3997	-0.0368	0.0067	3.22e-08	0.382568	-	-	-	-
Cbm_Right_CrusII	rs786819	10	48648356	A	C	0.8843	-0.0593	0.0101	4.58e-09	0.488315	-0.0643	0.01	1.54e-10	0.663345
Cbm_Right_CrusII	rs9422357	10	48650196	A	G	0.9122	-0.0762	0.0114	2.74e-11	0.762289	-0.0716	0.0114	2.85e-10	0.634647
Cbm_Right_CrusII	rs1678612	10	73859389	A	C	0.4527	0.0407	0.0065	3.97e-10	0.633058	-	-	-	-
Cbm_Right_CrusII	rs7079271	10	89833307	A	G	0.7065	-	-	-	-	0.0453	0.0071	1.61e-10	0.672915
Cbm_Right_CrusII	rs58513280	10	89890451	A	G	0.841	0.0605	0.0091	2.99e-11	0.808807	-	-	-	-
Cbm_Right_CrusII	rs12773789	10	89976112	A	G	0.1676	-0.0515	0.0087	2.74e-09	0.51887	-	-	-	-
Cbm_Right_CrusII	rs10883725	10	104235956	C	G	0.3545	-	-	-	-	-0.0436	0.0067	9.28e-11	0.695593
Cbm_Right_CrusII	rs61869602	10	104278306	T	C	0.5898	-0.0365	0.0066	3.89e-08	0.374655	-	-	-	-
Cbm_Right_CrusII	rs78640054	10	122841052	A	G	0.0648	0.1291	0.0132	1.33e-22	0.999863	0.0971	0.0131	1.23e-13	0.917408
Cbm_Right_CrusII	rs2248168	10	122853969	T	G	0.0868	-0.0741	0.0123	1.92e-09	0.695896	-	-	-	-
Cbm_Right_CrusII	rs72830638	10	123024639	A	T	0.0183	0.1349	0.0241	2.31e-08	0.388605	-	-	-	-
Cbm_Right_CrusII	rs932287	11	9044767	A	G	0.6568	-	-	-	-	-0.0384	0.0068	1.78e-08	0.404754
Cbm_Right_CrusII	rs1960181	11	9046767	A	C	0.2478	0.0464	0.0075	8.02e-10	0.608434	-	-	-	-
Cbm_Right_CrusII	rs1567244	11	31064256	T	C	0.0169	-	-	-	-	-0.1513	0.0251	1.57e-09	0.542704
Cbm_Right_CrusII	rs2210143	11	31300793	T	G	0.6792	-0.0391	0.007	1.91e-08	0.407372	-0.0396	0.0069	9.81e-09	0.432612
Cbm_Right_CrusII	rs144965273	11	31675459	A	C	0.9837	-	-	-	-	0.1422	0.0255	2.36e-08	0.380422
Cbm_Right_CrusII	rs174560	11	61581764	T	C	0.6847	-	-	-	-	-0.04	0.0069	6.74e-09	0.444473
Cbm_Right_CrusII	rs11111094	12	102328806	A	C	0.4776	-	-	-	-	-0.0466	0.0064	5.08e-13	0.885628
Cbm_Right_CrusII	rs35872193	12	102442428	A	T	0.7931	-0.0473	0.008	4.15e-09	0.510275	-0.0718	0.008	2.4e-19	0.997926
Cbm_Right_CrusII	rs76169231	12	102942969	T	C	0.7962	-	-	-	-	-0.0475	0.0079	2.29e-09	0.507663
Cbm_Right_CrusII	rs703545	12	102943000	A	G	0.1581	-0.0592	0.009	3.92e-11	0.765228	-0.0733	0.0089	1.7e-16	0.985874
Cbm_Right_CrusII	rs71466419	12	130337044	A	G	0.135	-0.0528	0.0095	2.77e-08	0.384426	-	-	-	-
Cbm_Right_CrusII	rs7318730	13	27146921	T	C	0.1924	-0.0494	0.0082	1.95e-09	0.54582	-	-	-	-
Cbm_Right_CrusII	rs696170	13	103614606	T	C	0.3733	-0.07	0.0067	1.53e-25	0.999989	-0.0601	0.0066	1.68e-19	0.99789
Cbm_Right_CrusII	rs713607	13	104750929	A	G	0.1345	0.0893	0.0095	3.5e-21	0.999449	0.0661	0.0094	1.93e-12	0.840454
Cbm_Right_CrusII	rs8018886	14	57317086	T	C	0.7843	-	-	-	-	-0.0455	0.0078	6.17e-09	0.460167
Cbm_Right_CrusII	rs10483677	14	57322440	A	G	0.764	-0.043	0.0076	1.76e-08	0.408205	-	-	-	-
Cbm_Right_CrusII	rs17721066	14	57540167	T	C	0.7	-	-	-	-	0.0525	0.007	8.84e-14	0.923261
Cbm_Right_CrusII	rs12892713	14	57574554	A	G	0.2993	-0.0644	0.0071	1.07e-19	0.998574	-	-	-	-
Cbm_Right_CrusII	rs117332043	14	57617154	T	C	0.0681	0.1985	0.0129	1.22e-53	1	0.1785	0.0128	1.59e-44	1
Cbm_Right_CrusII	rs79191875	14	57684250	T	C	0.8591	-0.0611	0.0092	3.69e-11	0.734282	-	-	-	-
Cbm_Right_CrusII	rs7155721	14	57697430	A	C	0.8585	-	-	-	-	-0.0553	0.0091	1.44e-09	0.523232
Cbm_Right_CrusII	rs76884351	14	57844349	T	C	0.887	-0.0613	0.0105	4.92e-09	0.538372	-	-	-	-
Cbm_Right_CrusII	rs2064914	14	68766305	C	G	0.2641	-0.0436	0.0074	3.63e-09	0.517204	-0.048	0.0073	5.5e-11	0.725357
Cbm_Right_CrusII	rs1957796	14	86283548	T	C	0.3806	-0.0402	0.0067	1.66e-09	0.550999	-	-	-	-
Cbm_Right_CrusII	rs10129303	14	86315004	A	T	0.3808	-	-	-	-	-0.0453	0.0068	3.69e-11	0.798703
Cbm_Right_CrusII	rs7141044	14	99716908	T	C	0.4968	-	-	-	-	-0.0407	0.0065	2.97e-10	0.642795
Cbm_Right_CrusII	rs1540840	14	99733384	C	G	0.4823	0.039	0.0071	3.88e-08	0.547522	-	-	-	-
Cbm_Right_CrusII	rs1405238	14	99733954	T	C	0.5794	-	-	-	-	-0.0494	0.0068	4.88e-13	0.935988
Cbm_Right_CrusII	rs10131783	14	99740208	A	G	0.1285	-0.0683	0.0096	1.36e-12	0.860651	-	-	-	-
Cbm_Right_CrusII	rs1441819	15	58243204	A	G	0.4456	0.0454	0.0066	4.21e-12	0.841333	-	-	-	-
Cbm_Right_CrusII	rs4528531	15	82322075	A	G	0.7086	0.0495	0.0071	3.92e-12	0.83629	-	-	-	-
Cbm_Right_CrusII	rs1969091	15	82326775	A	C	0.2883	-	-	-	-	-0.0403	0.0071	1.58e-08	0.406923
Cbm_Right_CrusII	rs7542	16	30125840	C	G	0.4409	-	-	-	-	0.0375	0.0065	7.25e-09	0.448531
Cbm_Right_CrusII	rs749671	16	31088347	A	G	0.3729	0.0383	0.0067	9.64e-09	0.437557	0.0363	0.0066	4.17e-08	0.332515
Cbm_Right_CrusII	rs2239919	17	43169392	A	G	0.351	0.0381	0.0068	2.06e-08	0.399976	0.0389	0.0067	7.96e-09	0.442811
Cbm_Right_CrusII	rs62064393	17	43665343	T	G	0.7788	0.0516	0.0078	4.58e-11	0.748991	-	-	-	-
Cbm_Right_CrusII	rs406400	17	43723930	A	G	0.7871	-	-	-	-	0.0705	0.0079	4.64e-19	0.997451
Cbm_Right_CrusII	rs2532387	17	44313522	T	G	0.2112	-	-	-	-	-0.0709	0.0079	2.9e-19	0.997602
Cbm_Right_CrusII	rs2696430	17	44338279	C	G	0.2282	-0.0528	0.0078	1.71e-11	0.811546	-	-	-	-
Cbm_Right_CrusII	rs1863115	17	44625928	A	C	0.7573	-	-	-	-	-0.0466	0.0082	1.12e-08	0.603062
Cbm_Right_CrusII	rs199445	17	44817408	T	C	0.2104	-	-	-	-	-0.0634	0.0079	7.4e-16	0.973436
Cbm_Right_CrusII	rs199528	17	44843136	T	C	0.2116	-0.0502	0.0079	2.25e-10	0.659128	-	-	-	-
Cbm_Right_CrusII	rs8073834	17	45698483	A	G	0.1696	-	-	-	-	0.0515	0.0086	2.34e-09	0.530288
Cbm_Right_CrusII	rs4793497	17	68651481	A	G	0.765	0.0424	0.0078	4.64e-08	0.377293	-	-	-	-
Cbm_Right_CrusII	rs7237677	18	18559675	C	G	0.405	-0.04	0.0066	1.53e-09	0.564234	-	-	-	-
Cbm_Right_CrusII	rs13381941	18	19154143	A	G	0.3414	-0.0433	0.0068	1.9e-10	0.662076	-	-	-	-
Cbm_Right_CrusII	rs4891262	18	73017380	T	C	0.3511	0.083	0.0068	2.5e-34	1	0.0708	0.0067	7.81e-26	0.999988
Cbm_Right_CrusII	rs17056851	18	73062920	A	G	0.2196	-0.0469	0.0078	1.61e-09	0.539317	-	-	-	-
Cbm_Right_CrusII	rs59394312	19	4070163	C	G	0.8293	-0.048	0.0087	3.08e-08	0.386267	-	-	-	-
Cbm_Right_CrusII	rs6079584	20	14840502	A	C	0.5777	0.0431	0.0066	4.72e-11	0.737127	0.061	0.0065	6.22e-21	0.999229
Cbm_Right_CrusII	rs3788664	22	45981492	T	C	0.4188	-	-	-	-	-0.0378	0.0068	2.82e-08	0.451899
Cbm_Left_VIIb	rs637168	1	23294671	A	G	0.164	-	-	-	-	-0.0562	0.0087	9.5e-11	0.691623
Cbm_Left_VIIb	rs9658947	1	23582510	T	G	0.7686	0.0438	0.0075	5.83e-09	0.432008	-	-	-	-
Cbm_Left_VIIb	rs240106	1	176555695	T	C	0.3773	-0.0376	0.0063	2.93e-09	0.404474	-	-	-	-
Cbm_Left_VIIb	rs17749164	1	231897207	T	C	0.5981	0.0424	0.0063	1.43e-11	0.68842	0.042	0.0066	2.5e-10	0.668141
Cbm_Left_VIIb	rs57933401	2	16144383	A	G	0.2677	0.0478	0.007	6.78e-12	0.725399	-	-	-	-
Cbm_Left_VIIb	rs10496403	2	106419622	T	G	0.731	-0.0394	0.007	1.53e-08	0.323718	-	-	-	-
Cbm_Left_VIIb	rs6753802	2	203055831	T	C	0.1132	0.053	0.0096	3.77e-08	0.25734	-	-	-	-
Cbm_Left_VIIb	rs6739830	2	208082651	A	G	0.4119	-0.0441	0.0063	1.91e-12	0.77451	-	-	-	-
Cbm_Left_VIIb	rs2234675	2	223085955	T	G	0.0423	-0.1167	0.0152	1.67e-14	0.896921	-	-	-	-
Cbm_Left_VIIb	rs9830690	3	88727258	T	C	0.3452	-	-	-	-	-0.0399	0.0069	9.15e-09	0.48867
Cbm_Left_VIIb	rs4865165	4	57765546	T	C	0.4986	-	-	-	-	0.0439	0.0065	1.32e-11	0.794992
Cbm_Left_VIIb	rs17218035	4	58930432	A	G	0.5648	-	-	-	-	0.0461	0.0065	1.59e-12	0.860721
Cbm_Left_VIIb	rs2199936	4	89045331	A	G	0.1145	-0.0523	0.0096	4.7e-08	0.24467	-	-	-	-
Cbm_Left_VIIb	rs4393969	4	94797500	T	C	0.3447	-	-	-	-	0.041	0.0069	2.9e-09	0.547178
Cbm_Left_VIIb	rs201180888	4	121174636	A	G	0.1367	-	-	-	-	-0.0563	0.0095	2.67e-09	0.531502
Cbm_Left_VIIb	rs7340949	4	145590933	A	G	0.5121	-0.0371	0.0062	1.67e-09	0.44022	-	-	-	-
Cbm_Left_VIIb	rs11727676	4	145659064	T	C	0.9052	0.0721	0.0105	5.9e-12	0.721274	-	-	-	-
Cbm_Left_VIIb	rs28578226	4	181109254	T	C	0.3442	-	-	-	-	-0.0426	0.0069	4.9e-10	0.63129
Cbm_Left_VIIb	rs4397121	5	112427880	A	G	0.6274	0.0398	0.0064	3.73e-10	0.519711	-	-	-	-
Cbm_Left_VIIb	rs10074318	5	112436568	A	G	0.3212	-	-	-	-	-0.046	0.007	4.57e-11	0.755108
Cbm_Left_VIIb	rs10900828	5	133836294	T	G	0.4128	0.0382	0.0064	2.8e-09	0.470004	-	-	-	-
Cbm_Left_VIIb	rs4711000	6	22099484	T	C	0.5504	0.0352	0.0062	1.18e-08	0.327718	-	-	-	-
Cbm_Left_VIIb	rs34578704	6	32555779	A	C	0.1285	-0.0537	0.0097	3.05e-08	0.376524	-	-	-	-
Cbm_Left_VIIb	rs482044	6	32576064	C	G	0.4091	-	-	-	-	-0.0366	0.0067	3.92e-08	0.379636
Cbm_Left_VIIb	rs13191889	6	35013209	A	G	0.4116	0.0348	0.0062	2.14e-08	0.289043	-	-	-	-
Cbm_Left_VIIb	rs7769624	6	148535313	A	C	0.428	-0.0473	0.0062	3.05e-14	0.892487	-	-	-	-
Cbm_Left_VIIb	rs756670	7	103343090	C	G	0.4365	-0.035	0.0062	1.7e-08	0.312168	-	-	-	-
Cbm_Left_VIIb	rs2299370	7	103344295	A	G	0.1291	-	-	-	-	0.058	0.0098	2.67e-09	0.543013
Cbm_Left_VIIb	rs1811159	7	103373071	A	G	0.3639	-	-	-	-	-0.0426	0.0067	2.41e-10	0.658024
Cbm_Left_VIIb	rs10250193	7	156094583	T	C	0.5818	0.0375	0.0062	1.75e-09	0.434901	-	-	-	-
Cbm_Left_VIIb	rs36013171	7	156160511	T	C	0.5432	-0.0407	0.0062	4.22e-11	0.63469	-0.0374	0.0065	9.51e-09	0.449811
Cbm_Left_VIIb	rs867789	7	156208619	T	C	0.9254	-0.0642	0.0117	3.59e-08	0.264388	-	-	-	-
Cbm_Left_VIIb	rs6995407	8	8384647	C	G	0.5141	-	-	-	-	0.0377	0.0065	6.51e-09	0.474024
Cbm_Left_VIIb	rs2929309	8	9083771	A	C	0.4764	-	-	-	-	0.0398	0.0065	9.06e-10	0.591337
Cbm_Left_VIIb	rs534523	8	9884999	C	G	0.4545	-	-	-	-	-0.0372	0.0065	1.13e-08	0.437883
Cbm_Left_VIIb	rs12386974	8	11400628	C	G	0.5084	-	-	-	-	0.0439	0.0065	1.24e-11	0.794758
Cbm_Left_VIIb	rs7834152	8	142042870	T	C	0.5858	0.0368	0.0063	4.68e-09	0.393645	-	-	-	-
Cbm_Left_VIIb	rs72754248	9	119061396	A	G	0.0706	0.1356	0.012	9.15e-30	0.999996	0.1609	0.0127	5.7e-37	1
Cbm_Left_VIIb	rs7020341	9	119247974	C	G	0.3612	-	-	-	-	0.0398	0.0067	3.66e-09	0.505287
Cbm_Left_VIIb	rs873418	10	89834396	T	C	0.7124	-	-	-	-	0.0422	0.0072	4.21e-09	0.504235
Cbm_Left_VIIb	rs12782003	10	122829941	C	G	0.3681	-0.0375	0.0065	8.82e-09	0.389114	-	-	-	-
Cbm_Left_VIIb	rs78640054	10	122841052	A	G	0.0648	-	-	-	-	0.0993	0.0132	5.95e-14	0.938583
Cbm_Left_VIIb	rs72830638	10	123024639	A	T	0.0183	-	-	-	-	0.1341	0.0242	3.09e-08	0.371671
Cbm_Left_VIIb	rs1567244	11	31064256	T	C	0.0169	-	-	-	-	-0.142	0.0253	1.97e-08	0.407238
Cbm_Left_VIIb	rs7978496	12	4100925	A	G	0.4992	-	-	-	-	-0.0377	0.0065	6.09e-09	0.474863
Cbm_Left_VIIb	rs10745601	12	92975756	A	C	0.7823	0.0425	0.0075	1.25e-08	0.330682	-	-	-	-
Cbm_Left_VIIb	rs4760401	12	93140809	A	G	0.6736	-0.0406	0.0065	5.55e-10	0.496208	-	-	-	-
Cbm_Left_VIIb	rs11111088	12	102324872	T	C	0.5207	-	-	-	-	0.0507	0.0066	1.05e-14	0.96335
Cbm_Left_VIIb	rs35872193	12	102442428	A	T	0.7931	-	-	-	-	-0.068	0.0081	3.28e-17	0.992362
Cbm_Left_VIIb	rs11111278	12	102846020	A	G	0.7921	-0.0565	0.0076	1.02e-13	0.865152	-	-	-	-
Cbm_Left_VIIb	rs703545	12	102943000	A	G	0.1581	-0.0551	0.0085	8.41e-11	0.616092	-0.0631	0.009	2.15e-12	0.870491
Cbm_Left_VIIb	rs696908	13	103618857	C	G	0.3735	-0.0507	0.0064	1.37e-15	0.940733	-	-	-	-
Cbm_Left_VIIb	rs9514079	13	103620231	T	C	0.6267	-	-	-	-	0.0564	0.0067	4.66e-17	0.990592
Cbm_Left_VIIb	rs2699320	13	103938031	A	T	0.1868	-	-	-	-	0.0665	0.0083	1.55e-15	0.97517
Cbm_Left_VIIb	rs2699315	13	103940450	A	G	0.1864	0.0663	0.0079	5.29e-17	0.973282	-	-	-	-
Cbm_Left_VIIb	rs1398586	13	104750688	A	C	0.1344	-	-	-	-	0.0811	0.0095	1.79e-17	0.993034
Cbm_Left_VIIb	rs713607	13	104750929	A	G	0.1345	0.0706	0.009	3.36e-15	0.924466	-	-	-	-
Cbm_Left_VIIb	rs9805964	14	57535645	T	G	0.3525	0.0394	0.0065	1.78e-09	0.471825	-	-	-	-
Cbm_Left_VIIb	rs117332043	14	57617154	T	C	0.0681	0.1628	0.0122	1.32e-40	1	0.1682	0.0129	5.19e-39	1
Cbm_Left_VIIb	rs55906330	14	57668188	A	G	0.1334	0.0603	0.0097	4.57e-10	0.658978	-	-	-	-
Cbm_Left_VIIb	rs11624408	14	99712945	A	G	0.5566	-	-	-	-	-0.0417	0.0066	2.48e-10	0.6812
Cbm_Left_VIIb	rs2693673	14	99735480	T	C	0.591	-0.0516	0.0067	8.93e-15	0.964269	-	-	-	-
Cbm_Left_VIIb	rs2664303	14	99750520	T	C	0.4225	-	-	-	-	0.043	0.0067	1.42e-10	0.732687
Cbm_Left_VIIb	rs62015113	15	67846023	A	G	0.913	-	-	-	-	0.0824	0.0115	8.41e-13	0.882635
Cbm_Left_VIIb	rs74023018	15	67898185	C	G	0.085	-0.0621	0.011	1.73e-08	0.308157	-	-	-	-
Cbm_Left_VIIb	rs148934699	17	4925475	T	C	0.006	0.223	0.0396	1.86e-08	0.298469	-	-	-	-
Cbm_Left_VIIb	rs78777685	17	35257232	A	G	0.2179	-	-	-	-	0.0454	0.0081	1.76e-08	0.462931
Cbm_Left_VIIb	rs1724430	17	43661959	T	C	0.7937	-	-	-	-	0.0643	0.008	7.4e-16	0.976478
Cbm_Left_VIIb	rs112972619	17	43776425	T	C	0.217	-0.0429	0.0074	8.19e-09	0.345793	-	-	-	-
Cbm_Left_VIIb	rs2532387	17	44313522	T	G	0.2112	-	-	-	-	-0.0667	0.008	6.12e-17	0.990089
Cbm_Left_VIIb	rs2732687	17	44338694	A	G	0.2309	-0.0445	0.0075	2.48e-09	0.463794	-	-	-	-
Cbm_Left_VIIb	rs9912530	17	44836302	T	C	0.2701	-	-	-	-	-0.0567	0.0073	9.6e-15	0.959543
Cbm_Left_VIIb	rs2106974	22	28026477	T	C	0.0423	0.093	0.0153	1.27e-09	0.459895	-	-	-	-
Cbm_Left_VIIb	rs134016	22	28038356	A	G	0.8013	0.082	0.0078	7.19e-26	0.999954	0.0549	0.0082	2.8e-11	0.790744
Cbm_Right_VIIb	rs309509	1	23283380	A	G	0.5342	-	-	-	-	0.0376	0.0066	1.23e-08	0.464255
Cbm_Right_VIIb	rs1342131	1	82292250	T	C	0.5727	0.038	0.0061	5.26e-10	0.468957	-	-	-	-
Cbm_Right_VIIb	rs17749164	1	231897207	T	C	0.5981	0.0521	0.0062	2.62e-17	0.968024	0.0383	0.0066	7.3e-09	0.466562
Cbm_Right_VIIb	rs143938988	2	16336984	A	G	0.2547	-0.0449	0.0082	4.95e-08	0.555988	-	-	-	-
Cbm_Right_VIIb	rs10496403	2	106419622	T	G	0.7309	-0.0484	0.0068	1.41e-12	0.753361	-	-	-	-
Cbm_Right_VIIb	rs933793	2	106511846	T	C	0.6112	-	-	-	-	-0.0399	0.0067	2.53e-09	0.542969
Cbm_Right_VIIb	rs2567199	2	106523877	T	C	0.8312	0.0447	0.0081	2.92e-08	0.252852	-	-	-	-
Cbm_Right_VIIb	rs3951501	2	207890835	T	C	0.4046	-0.0336	0.0061	4.1e-08	0.230363	-	-	-	-
Cbm_Right_VIIb	rs6739830	2	208082651	A	G	0.4119	-0.0389	0.0062	2.63e-10	0.508593	-	-	-	-
Cbm_Right_VIIb	rs2705579	2	217831965	T	C	0.6003	-	-	-	-	-0.0367	0.0067	4.25e-08	0.377397
Cbm_Right_VIIb	rs2234675	2	223085955	T	G	0.0423	-0.0953	0.0149	1.78e-10	0.512654	-	-	-	-
Cbm_Right_VIIb	rs2878298	3	49406080	T	C	0.5656	-0.0334	0.0061	3.7e-08	0.235988	-	-	-	-
Cbm_Right_VIIb	rs55787425	4	20685415	A	T	0.3949	0.0341	0.0062	3.79e-08	0.246095	-	-	-	-
Cbm_Right_VIIb	rs4865162	4	57767822	A	G	0.4246	0.0461	0.0061	4.04e-14	0.856165	-	-	-	-
Cbm_Right_VIIb	rs10020462	4	57825593	T	C	0.654	-	-	-	-	-0.0546	0.0068	9.81e-16	0.975917
Cbm_Right_VIIb	rs17218035	4	58930432	A	G	0.5647	0.0337	0.0061	2.78e-08	0.249647	0.0382	0.0065	4.44e-09	0.485227
Cbm_Right_VIIb	rs4393969	4	94797500	T	C	0.3447	-	-	-	-	0.0423	0.0069	8.3e-10	0.61611
Cbm_Right_VIIb	rs11097392	4	94808266	T	C	0.3666	0.0352	0.0063	2.38e-08	0.273239	-	-	-	-
Cbm_Right_VIIb	rs13107325	4	103188709	T	C	0.0713	0.086	0.0117	2.43e-13	0.809319	-	-	-	-
Cbm_Right_VIIb	rs201180888	4	121174636	A	G	0.1367	-	-	-	-	-0.0559	0.0094	3.22e-09	0.515844
Cbm_Right_VIIb	rs11946517	4	145599534	C	G	0.5812	0.0411	0.0061	1.81e-11	0.635045	-	-	-	-
Cbm_Right_VIIb	rs11727676	4	145659064	T	C	0.9052	-	-	-	-	0.0617	0.011	2.25e-08	0.389722
Cbm_Right_VIIb	rs11733300	4	146133826	A	G	0.4427	-0.0338	0.0061	2.46e-08	0.256997	-	-	-	-
Cbm_Right_VIIb	rs28578226	4	181109254	T	C	0.3441	-	-	-	-	-0.0456	0.0068	2.46e-11	0.771174
Cbm_Right_VIIb	rs835217	5	39359090	A	T	0.6284	-0.039	0.0064	1.26e-09	0.474417	-	-	-	-
Cbm_Right_VIIb	rs55818129	5	39425092	T	G	0.8851	0.0554	0.0095	5.77e-09	0.344068	-	-	-	-
Cbm_Right_VIIb	rs7727738	5	112021399	A	G	0.5044	-0.0353	0.006	4.88e-09	0.342195	-	-	-	-
Cbm_Right_VIIb	rs10074318	5	112436568	A	G	0.3212	-0.0501	0.0065	1.23e-14	0.89196	-0.0497	0.007	1.03e-12	0.88203
Cbm_Right_VIIb	rs17135382	5	112508708	T	C	0.9007	-	-	-	-	0.0599	0.0108	2.94e-08	0.372137
Cbm_Right_VIIb	rs10900828	5	133836294	T	G	0.4128	0.035	0.0063	2.86e-08	0.299482	-	-	-	-
Cbm_Right_VIIb	rs6922448	6	22513914	A	G	0.5755	0.034	0.0061	2.45e-08	0.258513	-	-	-	-
Cbm_Right_VIIb	rs7769624	6	148535313	A	C	0.428	-0.0422	0.0061	4.86e-12	0.69768	-	-	-	-
Cbm_Right_VIIb	rs720078	7	103283013	T	C	0.1498	0.0591	0.0085	2.8e-12	0.718429	-	-	-	-
Cbm_Right_VIIb	rs995450	7	103331061	A	G	0.3479	-0.0384	0.0064	1.59e-09	0.411688	-	-	-	-
Cbm_Right_VIIb	rs62482639	7	103360054	A	T	0.5462	-	-	-	-	0.0501	0.0065	1.57e-14	0.953544
Cbm_Right_VIIb	rs11979177	7	103387890	A	G	0.0684	-	-	-	-	0.0859	0.0129	2.82e-11	0.772685
Cbm_Right_VIIb	rs7804536	7	115032255	T	G	0.7967	-0.0466	0.0075	4.72e-10	0.463983	-	-	-	-
Cbm_Right_VIIb	rs56746894	7	115445450	A	G	0.554	-0.0345	0.0061	1.52e-08	0.291316	-	-	-	-
Cbm_Right_VIIb	rs9692071	7	155082893	T	G	0.1039	0.0538	0.0098	4.26e-08	0.223868	-	-	-	-
Cbm_Right_VIIb	rs10447502	7	156072251	T	C	0.2893	-0.0447	0.0066	1.66e-11	0.634126	-	-	-	-
Cbm_Right_VIIb	rs10244637	7	156157853	A	G	0.5948	-	-	-	-	-0.0361	0.0066	3.72e-08	0.349852
Cbm_Right_VIIb	rs36071136	7	156166303	C	G	0.5747	-0.0419	0.0061	6.34e-12	0.68099	-	-	-	-
Cbm_Right_VIIb	rs1543988	7	156205302	T	C	0.928	-0.0663	0.0117	1.45e-08	0.290203	-	-	-	-
Cbm_Right_VIIb	rs2976908	8	8345774	T	G	0.6053	-	-	-	-	0.0403	0.0066	1.29e-09	0.571253
Cbm_Right_VIIb	rs4841099	8	8952197	C	G	0.7286	-0.0389	0.0068	8.31e-09	0.306104	-	-	-	-
Cbm_Right_VIIb	rs453301	8	9030387	T	G	0.507	-	-	-	-	0.045	0.0065	3.59e-12	0.836617
Cbm_Right_VIIb	rs6601451	8	10243681	C	G	0.4827	-	-	-	-	-0.0397	0.0065	9.28e-10	0.586934
Cbm_Right_VIIb	rs7010262	8	10836508	A	G	0.521	0.037	0.0061	1.47e-09	0.433359	0.0422	0.0066	1.36e-10	0.71745
Cbm_Right_VIIb	rs12386974	8	11400628	C	G	0.5083	0.0379	0.006	3.14e-10	0.485966	-	-	-	-
Cbm_Right_VIIb	rs6601599	8	11402347	A	G	0.4917	-	-	-	-	-0.0459	0.0065	1.56e-12	0.866329
Cbm_Right_VIIb	rs34881325	9	2622134	T	C	0.3694	-0.0391	0.0066	2.51e-09	0.477294	-	-	-	-
Cbm_Right_VIIb	rs7874933	9	2622554	T	C	0.1848	-	-	-	-	0.0513	0.0086	2.62e-09	0.595981
Cbm_Right_VIIb	rs74441363	9	76371779	T	C	0.0302	-0.1186	0.0176	1.46e-11	0.637159	-	-	-	-
Cbm_Right_VIIb	rs10867771	9	84167415	A	T	0.3492	-0.042	0.0064	4.4e-11	0.607293	-	-	-	-
Cbm_Right_VIIb	rs10867772	9	84172144	A	T	0.3497	-	-	-	-	-0.0394	0.0068	6.87e-09	0.467768
Cbm_Right_VIIb	rs11139809	9	85439820	A	C	0.6742	-0.0361	0.0065	2.43e-08	0.26917	-	-	-	-
Cbm_Right_VIIb	rs72754248	9	119061396	A	G	0.0706	0.0986	0.0118	4.88e-17	0.961671	0.1424	0.0126	1.94e-29	1
Cbm_Right_VIIb	rs10817897	9	119245955	A	G	0.3601	-	-	-	-	0.0406	0.0067	1.74e-09	0.547547
Cbm_Right_VIIb	rs7860925	9	119367184	T	C	0.5373	-0.0365	0.006	1.53e-09	0.401597	-	-	-	-
Cbm_Right_VIIb	rs873418	10	89834396	T	C	0.7124	-	-	-	-	0.0418	0.0072	5.41e-09	0.483794
Cbm_Right_VIIb	rs78640054	10	122841052	A	G	0.0649	-	-	-	-	0.0901	0.0132	8.2e-12	0.81442
Cbm_Right_VIIb	rs1567244	11	31064256	T	C	0.0169	-	-	-	-	-0.1398	0.0252	3.01e-08	0.376179
Cbm_Right_VIIb	rs7978496	12	4100925	A	G	0.4992	-	-	-	-	-0.039	0.0065	1.7e-09	0.548903
Cbm_Right_VIIb	rs10745601	12	92975756	A	C	0.7823	0.0438	0.0073	2.39e-09	0.387981	-	-	-	-
Cbm_Right_VIIb	rs11111094	12	102328806	A	C	0.4776	-	-	-	-	-0.0438	0.0065	1.59e-11	0.789111
Cbm_Right_VIIb	rs35872193	12	102442428	A	T	0.7931	-	-	-	-	-0.0633	0.008	3.4e-15	0.969987
Cbm_Right_VIIb	rs11111278	12	102846020	A	G	0.7922	-0.0572	0.0075	1.63e-14	0.881771	-	-	-	-
Cbm_Right_VIIb	rs703544	12	102942355	A	G	0.8418	0.0489	0.0083	4.43e-09	0.362978	-	-	-	-
Cbm_Right_VIIb	rs703545	12	102943000	A	G	0.1581	-	-	-	-	-0.0601	0.009	2.01e-11	0.792626
Cbm_Right_VIIb	rs696170	13	103614606	T	C	0.3733	-	-	-	-	-0.0525	0.0067	4.64e-15	0.964778
Cbm_Right_VIIb	rs2162230	13	103626942	C	G	0.3903	-0.0479	0.0062	8.57e-15	0.890513	-	-	-	-
Cbm_Right_VIIb	rs2774498	13	103937920	T	C	0.8131	-	-	-	-	-0.0616	0.0083	1.35e-13	0.921806
Cbm_Right_VIIb	rs2699315	13	103940450	A	G	0.1865	0.0661	0.0078	1.72e-17	0.971973	-	-	-	-
Cbm_Right_VIIb	rs1398585	13	104750687	A	G	0.8652	-0.0736	0.0088	9.11e-17	0.958678	-0.0769	0.0095	5.92e-16	0.980215
Cbm_Right_VIIb	rs35660835	14	57318263	A	C	0.7853	-0.0418	0.0074	1.45e-08	0.292747	-	-	-	-
Cbm_Right_VIIb	rs117332043	14	57617154	T	C	0.0681	0.1857	0.012	3.56e-54	1	0.1843	0.0128	1.22e-46	1
Cbm_Right_VIIb	rs55906330	14	57668188	A	G	0.1334	-	-	-	-	0.0629	0.0102	6.29e-10	0.746211
Cbm_Right_VIIb	rs79191875	14	57684250	T	C	0.8591	-0.0649	0.0086	4.19e-14	0.842346	-	-	-	-
Cbm_Right_VIIb	rs534727641	14	57811350	A	G	0.0076	0.1961	0.0347	1.63e-08	0.279792	-	-	-	-
Cbm_Right_VIIb	rs941521	14	99708876	A	G	0.574	0.043	0.0062	2.96e-12	0.73479	-	-	-	-
Cbm_Right_VIIb	rs35604463	14	99712032	A	G	0.439	-	-	-	-	0.0502	0.0066	3.05e-14	0.952772
Cbm_Right_VIIb	rs2496482	14	99750164	T	C	0.4208	-	-	-	-	0.0435	0.0066	5.65e-11	0.754361
Cbm_Right_VIIb	rs2583590	15	67836253	A	C	0.0867	-	-	-	-	-0.0697	0.0115	1.41e-09	0.561704
Cbm_Right_VIIb	rs3784688	15	67837009	A	G	0.0857	-0.0633	0.0108	4.22e-09	0.349542	-	-	-	-
Cbm_Right_VIIb	rs9922288	16	24550930	A	G	0.2283	0.043	0.0073	4.23e-09	0.385048	-	-	-	-
Cbm_Right_VIIb	rs414457	16	66215936	T	C	0.3788	0.0359	0.0062	7.5e-09	0.317895	-	-	-	-
Cbm_Right_VIIb	rs71366589	17	4004590	T	C	0.9814	-	-	-	-	-0.137	0.0239	9.36e-09	0.44179
Cbm_Right_VIIb	rs2040845	17	43767188	C	G	0.219	-	-	-	-	-0.0662	0.0078	2.87e-17	0.991201
Cbm_Right_VIIb	rs113173628	17	43794899	T	C	0.2096	-0.0672	0.0075	2.46e-19	0.991114	-	-	-	-
Cbm_Right_VIIb	rs2696430	17	44338279	C	G	0.2283	-0.0651	0.0073	4.75e-19	0.990925	-0.0687	0.0078	1.96e-18	0.997377
Cbm_Right_VIIb	rs199525	17	44847834	T	G	0.7877	0.0566	0.0074	1.52e-14	0.878213	-	-	-	-
Cbm_Right_VIIb	rs199501	17	44862613	A	G	0.2341	-	-	-	-	-0.0591	0.0076	9.32e-15	0.955513
Cbm_Right_VIIb	rs4891262	18	73017380	T	C	0.3511	0.0369	0.0063	5.15e-09	0.338377	0.0455	0.0068	2.09e-11	0.775728
Cbm_Right_VIIb	rs6079584	20	14840502	A	C	0.5777	0.0378	0.0061	5.64e-10	0.454453	-	-	-	-
Cbm_Right_VIIb	rs112727835	20	34539459	A	G	0.943	-	-	-	-	-0.0789	0.0141	2.01e-08	0.413623
Cbm_Right_VIIb	rs84511	22	28039203	T	G	0.7542	0.0615	0.0071	5.9e-18	0.983016	0.042	0.0076	4.01e-08	0.388592
Cbm_Right_VIIb	rs5999742	22	35540423	A	G	0.7206	-0.0401	0.0068	2.76e-09	0.378978	-	-	-	-
Cbm_Left_VIIIa	rs1413974	1	23347125	T	C	0.5094	-	-	-	-	0.0356	0.0065	3.38e-08	0.357859
Cbm_Left_VIIIa	rs3737984	1	53708850	T	G	0.4162	-	-	-	-	0.0419	0.0065	1.3e-10	0.674856
Cbm_Left_VIIIa	rs3790941	1	82315273	A	G	0.6014	-0.04	0.0063	1.98e-10	0.558451	-	-	-	-
Cbm_Left_VIIIa	rs2942352	1	212691887	A	G	0.7752	0.0484	0.0074	7.89e-11	0.627211	-	-	-	-
Cbm_Left_VIIIa	rs17749164	1	231897207	T	C	0.5981	0.0586	0.0063	1.1e-20	0.997155	0.0483	0.0066	2.04e-13	0.906353
Cbm_Left_VIIIa	rs2889605	2	106525073	T	C	0.6338	-0.0404	0.0064	3.72e-10	0.544748	-	-	-	-
Cbm_Left_VIIIa	rs60331765	2	182447581	A	G	0.8433	-0.0486	0.0085	1.08e-08	0.344051	-	-	-	-
Cbm_Left_VIIIa	rs2234675	2	223085955	T	G	0.0423	-0.0959	0.0152	3.09e-10	0.526419	-	-	-	-
Cbm_Left_VIIIa	rs9830690	3	88727258	T	C	0.3452	-0.0403	0.0066	9.83e-10	0.510222	-	-	-	-
Cbm_Left_VIIIa	rs17218035	4	58930432	A	G	0.5648	0.0378	0.0062	9.69e-10	0.462421	-	-	-	-
Cbm_Left_VIIIa	rs28408270	4	95114572	T	G	0.4698	0.0356	0.0061	7.27e-09	0.354695	-	-	-	-
Cbm_Left_VIIIa	rs13107325	4	103188709	T	C	0.0713	-	-	-	-	0.1291	0.0126	9.7e-25	0.999973
Cbm_Left_VIIIa	rs11727676	4	145659064	T	C	0.9052	0.0614	0.0105	4.89e-09	0.378258	-	-	-	-
Cbm_Left_VIIIa	rs2920507	5	89419677	A	C	0.3102	0.0379	0.0067	1.21e-08	0.329916	-	-	-	-
Cbm_Left_VIIIa	rs10074318	5	112436568	A	G	0.3212	-	-	-	-	-0.049	0.0069	1.54e-12	0.862501
Cbm_Left_VIIIa	rs72831708	6	8730954	T	G	0.0626	-0.0701	0.0127	3.49e-08	0.275063	-0.1128	0.0133	2.12e-17	0.990926
Cbm_Left_VIIIa	rs144861591	6	26072992	T	C	0.0744	-	-	-	-	-0.073	0.0123	3.22e-09	0.508499
Cbm_Left_VIIIa	rs41266839	6	26409890	C	G	0.1091	-	-	-	-	0.0568	0.0103	3.56e-08	0.349159
Cbm_Left_VIIIa	rs200958417	6	90742205	T	C	0.7673	0.0433	0.0079	4.19e-08	0.412406	-	-	-	-
Cbm_Left_VIIIa	rs7769624	6	148535313	A	C	0.428	-0.0474	0.0062	3.1e-14	0.895084	-	-	-	-
Cbm_Left_VIIIa	rs2299357	7	103310001	T	C	0.3907	-	-	-	-	-0.0471	0.0066	1.11e-12	0.868124
Cbm_Left_VIIIa	rs1627863	7	103402076	T	G	0.3766	-	-	-	-	-0.0431	0.0067	1.08e-10	0.698008
Cbm_Left_VIIIa	rs35025589	7	114974327	C	G	0.7969	-0.0446	0.0076	4.77e-09	0.37353	-	-	-	-
Cbm_Left_VIIIa	rs7780464	7	115450015	T	C	0.445	0.0402	0.0062	9.53e-11	0.602434	-	-	-	-
Cbm_Left_VIIIa	rs12698398	7	156111722	C	G	0.7032	0.0409	0.0067	1.27e-09	0.456117	-	-	-	-
Cbm_Left_VIIIa	rs2980439	8	8094870	A	G	0.4653	-0.0409	0.0062	3.73e-11	0.648242	-	-	-	-
Cbm_Left_VIIIa	rs2929455	8	9083433	A	T	0.5237	-	-	-	-	-0.0388	0.0065	1.88e-09	0.535104
Cbm_Left_VIIIa	rs2929451	8	9085295	A	T	0.486	-0.041	0.0061	2.56e-11	0.657882	-	-	-	-
Cbm_Left_VIIIa	rs7017349	8	10077241	A	G	0.5596	-0.0401	0.0063	1.75e-10	0.594582	-	-	-	-
Cbm_Left_VIIIa	rs11250097	8	10811829	T	C	0.466	-0.0391	0.0062	2.22e-10	0.549444	-	-	-	-
Cbm_Left_VIIIa	rs67390008	8	11338594	T	C	0.3768	0.0362	0.0064	1.83e-08	0.330987	-	-	-	-
Cbm_Left_VIIIa	rs12386974	8	11400628	C	G	0.5084	-	-	-	-	0.0381	0.0064	3.36e-09	0.497381
Cbm_Left_VIIIa	rs10102512	8	11534882	A	G	0.7418	0.0489	0.0071	4.52e-12	0.74753	-	-	-	-
Cbm_Left_VIIIa	rs77545932	9	76271744	T	C	0.9728	-	-	-	-	0.1511	0.0198	2.6e-14	0.94252
Cbm_Left_VIIIa	rs72754248	9	119061396	A	G	0.0706	0.1692	0.012	3.27e-45	1	0.1026	0.0126	3.3e-16	0.980009
Cbm_Left_VIIIa	rs873418	10	89834396	T	C	0.7124	-	-	-	-	0.0418	0.0071	4.73e-09	0.483571
Cbm_Left_VIIIa	rs1781901	10	122609736	A	C	0.8788	-0.0517	0.0094	4.16e-08	0.264816	-	-	-	-
Cbm_Left_VIIIa	rs78640054	10	122841052	A	G	0.0648	0.109	0.0125	3.33e-18	0.986846	-	-	-	-
Cbm_Left_VIIIa	rs72830638	10	123024639	A	T	0.0183	0.1575	0.0229	6.41e-12	0.720263	-	-	-	-
Cbm_Left_VIIIa	rs11200069	10	123429042	A	G	0.8102	-0.0497	0.0079	2.54e-10	0.547716	-	-	-	-
Cbm_Left_VIIIa	rs4752582	10	123443605	A	G	0.9247	-0.0948	0.0117	4.86e-16	0.955552	-	-	-	-
Cbm_Left_VIIIa	rs1619165	10	123490269	A	G	0.4736	-0.0353	0.0062	9.36e-09	0.339684	-	-	-	-
Cbm_Left_VIIIa	rs1140711	11	27517409	T	C	0.4414	-0.0385	0.0062	6.82e-10	0.505358	-	-	-	-
Cbm_Left_VIIIa	rs4246215	11	61564299	T	G	0.3611	0.0368	0.0064	8.42e-09	0.344977	-	-	-	-
Cbm_Left_VIIIa	rs10745601	12	92975756	A	C	0.7823	0.0435	0.0075	5.91e-09	0.374485	-	-	-	-
Cbm_Left_VIIIa	rs4301837	12	102336310	T	C	0.505	-	-	-	-	0.047	0.0065	4.46e-13	0.897451
Cbm_Left_VIIIa	rs35872193	12	102442428	A	T	0.7931	-0.0537	0.0076	2.2e-12	0.778609	-0.0594	0.008	1.14e-13	0.923578
Cbm_Left_VIIIa	rs703545	12	102943000	A	G	0.1581	-0.0495	0.0085	5.88e-09	0.386211	-0.0503	0.0089	1.69e-08	0.417976
Cbm_Left_VIIIa	rs78929770	12	102946220	A	C	0.0883	0.0635	0.0108	4.17e-09	0.381577	-	-	-	-
Cbm_Left_VIIIa	rs9514079	13	103620231	T	C	0.6267	0.0574	0.0064	2.06e-19	0.993579	-	-	-	-
Cbm_Left_VIIIa	rs7332530	13	103651952	C	G	0.2846	-	-	-	-	-0.0485	0.0072	1.49e-11	0.789427
Cbm_Left_VIIIa	rs1529277	13	103927898	T	C	0.1869	0.1118	0.0079	1.18e-45	1	-	-	-	-
Cbm_Left_VIIIa	rs9518965	13	103929439	T	C	0.2666	-0.0414	0.0071	6.06e-09	0.413496	-	-	-	-
Cbm_Left_VIIIa	rs2774496	13	103938822	A	G	0.1869	-	-	-	-	0.068	0.0083	2.46e-16	0.983493
Cbm_Left_VIIIa	rs75013769	13	103997076	C	G	0.0403	0.0859	0.0157	4.69e-08	0.266736	-	-	-	-
Cbm_Left_VIIIa	rs1398586	13	104750688	A	C	0.1345	-	-	-	-	0.0611	0.0095	1.1e-10	0.693674
Cbm_Left_VIIIa	rs713607	13	104750929	A	G	0.1345	0.1005	0.009	4.36e-29	0.999993	-	-	-	-
Cbm_Left_VIIIa	rs9805964	14	57535645	T	G	0.3525	0.0481	0.0066	2.22e-13	0.868338	-	-	-	-
Cbm_Left_VIIIa	rs117332043	14	57617154	T	C	0.0681	0.145	0.0122	1.91e-32	1	0.1385	0.0128	2.38e-27	0.999997
Cbm_Left_VIIIa	rs7155721	14	57697430	A	C	0.8585	-0.0497	0.0088	1.33e-08	0.308531	-	-	-	-
Cbm_Left_VIIIa	rs12586230	14	69031272	A	C	0.7443	0.0399	0.0071	1.84e-08	0.317066	-	-	-	-
Cbm_Left_VIIIa	rs62015152	15	67868976	A	G	0.0894	-0.0921	0.0109	2.6e-17	0.980433	-	-	-	-
Cbm_Left_VIIIa	rs58648944	15	67965102	A	G	0.4047	0.0378	0.0064	2.56e-09	0.44123	-	-	-	-
Cbm_Left_VIIIa	rs78777685	17	35257232	A	G	0.2179	0.0725	0.0076	2.46e-21	0.99906	-	-	-	-
Cbm_Left_VIIIa	rs9905515	17	35261073	C	G	0.223	-0.072	0.0074	3.41e-22	0.999097	-	-	-	-
Cbm_Left_VIIIa	rs55826010	17	43679193	A	G	0.2318	-	-	-	-	-0.0555	0.0077	6.6e-13	0.892986
Cbm_Left_VIIIa	rs62054372	17	43798775	C	G	0.2167	-0.0526	0.0075	2.14e-12	0.771578	-	-	-	-
Cbm_Left_VIIIa	rs2532387	17	44313522	T	G	0.2112	-	-	-	-	-0.0566	0.0079	8.86e-13	0.874946
Cbm_Left_VIIIa	rs2696558	17	44346951	A	T	0.3143	-0.0515	0.0068	4.73e-14	0.916869	-	-	-	-
Cbm_Left_VIIIa	rs9912530	17	44836302	T	C	0.2701	-	-	-	-	-0.0477	0.0073	5.3e-11	0.726396
Cbm_Left_VIIIa	rs199519	17	44853924	A	G	0.7616	0.0426	0.0072	3.74e-09	0.396399	-	-	-	-
Cbm_Left_VIIIa	rs2571009	18	44650279	A	G	0.5218	-	-	-	-	0.0395	0.0065	9.67e-10	0.574932
Cbm_Left_VIIIa	rs2668779	18	44742066	A	C	0.4738	-0.0416	0.0062	1.86e-11	0.686746	-	-	-	-
Cbm_Left_VIIIa	rs9646585	18	72889170	A	T	0.2128	0.043	0.0075	1.06e-08	0.336962	-	-	-	-
Cbm_Left_VIIIa	rs6058247	20	34033548	T	C	0.223	-	-	-	-	0.046	0.0078	3.66e-09	0.50989
Cbm_Left_VIIIa	rs79317	22	28032457	T	C	0.7985	-	-	-	-	0.0613	0.008	1.98e-14	0.942545
Cbm_Left_VIIIa	rs134016	22	28038356	A	G	0.8013	0.061	0.0078	5.72e-15	0.934225	-	-	-	-
Cbm_Left_VIIIa	rs5945340	X	152955267	C	G	0.6522	-	-	-	-	0.032	0.0058	2.72e-08	0.136566
Cbm_Right_VIIIa	rs6678244	1	51418437	A	G	0.585	-	-	-	-	-0.0374	0.0067	2.58e-08	0.426936
Cbm_Right_VIIIa	rs11579931	1	117534457	A	G	0.2647	0.0399	0.0071	1.59e-08	0.337323	-	-	-	-
Cbm_Right_VIIIa	rs2889605	2	106525073	T	C	0.6339	-0.0391	0.0065	2.21e-09	0.473264	-	-	-	-
Cbm_Right_VIIIa	rs2260845	2	109350076	A	G	0.0761	-	-	-	-	0.0681	0.0124	3.62e-08	0.383603
Cbm_Right_VIIIa	rs55787425	4	20685415	A	T	0.3949	0.0352	0.0064	4.39e-08	0.297001	-	-	-	-
Cbm_Right_VIIIa	rs4865165	4	57765546	T	C	0.4986	-	-	-	-	0.0414	0.0065	1.81e-10	0.679461
Cbm_Right_VIIIa	rs922604	4	58714553	T	C	0.642	0.0368	0.0066	3.08e-08	0.341465	-	-	-	-
Cbm_Right_VIIIa	rs2412856	4	58739564	A	G	0.1318	0.0516	0.0093	2.83e-08	0.32201	-	-	-	-
Cbm_Right_VIIIa	rs17218035	4	58930432	A	G	0.5648	0.0456	0.0063	3.78e-13	0.844256	-	-	-	-
Cbm_Right_VIIIa	rs59109149	4	94807342	A	C	0.6344	-0.037	0.0065	1.33e-08	0.360205	-	-	-	-
Cbm_Right_VIIIa	rs13107325	4	103188709	T	C	0.0713	-	-	-	-	0.1204	0.0127	2.38e-21	0.999654
Cbm_Right_VIIIa	rs11727676	4	145659064	T	C	0.9052	0.0701	0.0106	4.46e-11	0.662392	-	-	-	-
Cbm_Right_VIIIa	rs28578226	4	181109254	T	C	0.3442	-	-	-	-	-0.0384	0.0069	2.25e-08	0.406717
Cbm_Right_VIIIa	rs511906	5	112136204	A	G	0.5069	-	-	-	-	-0.0356	0.0065	4.66e-08	0.357984
Cbm_Right_VIIIa	rs10074318	5	112436568	A	G	0.3212	-	-	-	-	-0.0412	0.007	3.88e-09	0.51964
Cbm_Right_VIIIa	rs72831708	6	8730954	T	G	0.0626	-0.0871	0.0129	1.34e-11	0.719197	-	-	-	-
Cbm_Right_VIIIa	rs41266839	6	26409890	C	G	0.1091	-	-	-	-	0.0599	0.0104	8.16e-09	0.455793
Cbm_Right_VIIIa	rs35526527	6	27042287	A	C	0.1345	-	-	-	-	0.0534	0.0095	1.71e-08	0.405749
Cbm_Right_VIIIa	rs7769624	6	148535313	A	C	0.428	-0.04	0.0063	2.63e-10	0.581724	-	-	-	-
Cbm_Right_VIIIa	rs17286505	7	103326246	C	G	0.4847	-	-	-	-	0.0444	0.0066	1.19e-11	0.813966
Cbm_Right_VIIIa	rs201874085	7	103386910	T	C	0.9219	-	-	-	-	-0.0693	0.0124	2.41e-08	0.448401
Cbm_Right_VIIIa	rs62474710	7	115044851	T	C	0.2034	0.0487	0.0077	3.12e-10	0.560561	-	-	-	-
Cbm_Right_VIIIa	rs4607542	7	115442859	T	C	0.4042	0.0432	0.0063	8.34e-12	0.728812	-	-	-	-
Cbm_Right_VIIIa	rs2980439	8	8094870	A	G	0.4653	-0.0395	0.0063	2.95e-10	0.571736	-	-	-	-
Cbm_Right_VIIIa	rs4841093	8	8920269	C	G	0.5447	-	-	-	-	0.0383	0.0066	7.89e-09	0.500374
Cbm_Right_VIIIa	rs435581	8	9029413	A	G	0.4994	0.041	0.0062	4.87e-11	0.658725	-	-	-	-
Cbm_Right_VIIIa	rs6982148	8	9581070	C	G	0.6341	0.0357	0.0064	2.89e-08	0.295937	-	-	-	-
Cbm_Right_VIIIa	rs113536795	8	10088486	C	G	0.3559	0.042	0.0066	2.44e-10	0.616811	-	-	-	-
Cbm_Right_VIIIa	rs2975731	8	10090864	C	G	0.4527	-	-	-	-	-0.0383	0.0066	6.53e-09	0.499368
Cbm_Right_VIIIa	rs7010262	8	10836508	A	G	0.5211	0.0426	0.0063	1.8e-11	0.736456	-	-	-	-
Cbm_Right_VIIIa	rs2736342	8	11347289	T	G	0.4427	-0.0443	0.0063	1.51e-12	0.799366	-	-	-	-
Cbm_Right_VIIIa	rs12386974	8	11400628	C	G	0.5084	-	-	-	-	0.0406	0.0065	4.28e-10	0.637201
Cbm_Right_VIIIa	rs7845566	8	11653150	T	C	0.8298	-0.0464	0.0083	2.3e-08	0.320229	-	-	-	-
Cbm_Right_VIIIa	rs72754248	9	119061396	A	G	0.0706	0.1797	0.0122	2.1e-49	1	0.1118	0.0127	1.31e-18	0.996814
Cbm_Right_VIIIa	rs10786677	10	104313365	T	C	0.3334	-0.0391	0.0067	3.96e-09	0.427646	-	-	-	-
Cbm_Right_VIIIa	rs11196199	10	114796117	A	G	0.8453	-0.0476	0.0086	3.56e-08	0.29762	-	-	-	-
Cbm_Right_VIIIa	rs78640054	10	122841052	A	G	0.0648	0.097	0.0127	2.39e-14	0.915572	0.0737	0.0132	2.57e-08	0.396826
Cbm_Right_VIIIa	rs72830638	10	123024639	A	T	0.0183	0.1303	0.0233	2.12e-08	0.323009	-	-	-	-
Cbm_Right_VIIIa	rs3135819	10	123241122	C	G	0.9353	0.0718	0.0126	1.06e-08	0.343581	-	-	-	-
Cbm_Right_VIIIa	rs11200069	10	123429042	A	G	0.8102	-0.0463	0.008	6.35e-09	0.396855	-	-	-	-
Cbm_Right_VIIIa	rs4752582	10	123443605	A	G	0.9247	-0.0923	0.0118	6.55e-15	0.934784	-	-	-	-
Cbm_Right_VIIIa	rs1140711	11	27517409	T	C	0.4414	-0.048	0.0063	3.49e-14	0.913599	-	-	-	-
Cbm_Right_VIIIa	rs7971974	12	28277558	A	T	0.7937	-	-	-	-	0.0441	0.0081	4.81e-08	0.362634
Cbm_Right_VIIIa	rs1795938	12	43489425	A	T	0.6065	-0.0356	0.0064	2.55e-08	0.315539	-	-	-	-
Cbm_Right_VIIIa	rs10745601	12	92975756	A	C	0.7823	0.0431	0.0076	1.35e-08	0.356731	-	-	-	-
Cbm_Right_VIIIa	rs11111094	12	102328806	A	C	0.4775	-	-	-	-	-0.0392	0.0065	1.86e-09	0.55801
Cbm_Right_VIIIa	rs35872193	12	102442428	A	T	0.7931	-0.0536	0.0078	4.83e-12	0.775149	-0.0472	0.0081	5.14e-09	0.505653
Cbm_Right_VIIIa	rs703547	12	102943707	C	G	0.8419	0.048	0.0086	2.58e-08	0.327895	-	-	-	-
Cbm_Right_VIIIa	rs78929770	12	102946220	A	C	0.0883	0.0647	0.011	3.5e-09	0.419194	-	-	-	-
Cbm_Right_VIIIa	rs9514079	13	103620231	T	C	0.6267	0.0431	0.0065	2.44e-11	0.694333	-	-	-	-
Cbm_Right_VIIIa	rs1529282	13	103908535	T	C	0.2656	-0.0404	0.0072	2.35e-08	0.362736	-	-	-	-
Cbm_Right_VIIIa	rs1529276	13	103928007	A	T	0.1882	0.1003	0.008	2.18e-36	1	-	-	-	-
Cbm_Right_VIIIa	rs2774498	13	103937920	T	C	0.8132	-	-	-	-	-0.0514	0.0084	7.92e-10	0.60987
Cbm_Right_VIIIa	rs75013769	13	103997076	C	G	0.0403	0.0948	0.0159	2.79e-09	0.451411	-	-	-	-
Cbm_Right_VIIIa	rs1398585	13	104750687	A	G	0.8652	-0.0864	0.0092	3.59e-21	0.998593	-	-	-	-
Cbm_Right_VIIIa	rs73587128	13	104754204	A	G	0.8806	-	-	-	-	-0.0632	0.0101	3.47e-10	0.658785
Cbm_Right_VIIIa	rs9805964	14	57535645	T	G	0.3525	0.0475	0.0067	9e-13	0.850023	-	-	-	-
Cbm_Right_VIIIa	rs117332043	14	57617154	T	C	0.0681	0.1415	0.0124	3.61e-30	0.999999	0.1321	0.0129	1.29e-24	0.999978
Cbm_Right_VIIIa	rs2842333	14	69008693	T	C	0.2254	-0.0428	0.0075	9.69e-09	0.367148	-	-	-	-
Cbm_Right_VIIIa	rs3916222	14	99707933	T	C	0.4401	-	-	-	-	0.0422	0.0067	2.16e-10	0.704529
Cbm_Right_VIIIa	rs2693673	14	99735480	T	C	0.591	-0.0406	0.0068	1.91e-09	0.60055	-	-	-	-
Cbm_Right_VIIIa	rs62015152	15	67868976	A	G	0.0894	-0.0838	0.011	3.01e-14	0.916942	-	-	-	-
Cbm_Right_VIIIa	rs929865	16	85703627	T	G	0.5639	0.0364	0.0063	7.32e-09	0.385274	-	-	-	-
Cbm_Right_VIIIa	rs78777685	17	35257232	A	G	0.2179	0.0682	0.0077	1.37e-18	0.99534	-	-	-	-
Cbm_Right_VIIIa	rs9905515	17	35261073	C	G	0.223	-0.0678	0.0075	2.36e-19	0.995598	-	-	-	-
Cbm_Right_VIIIa	rs2040845	17	43767188	C	G	0.219	-0.0553	0.0075	2.34e-13	0.861541	-	-	-	-
Cbm_Right_VIIIa	rs75788861	17	43822769	T	C	0.2127	-	-	-	-	-0.0597	0.008	7.29e-14	0.937012
Cbm_Right_VIIIa	rs71375338	17	44332793	A	G	0.2577	-	-	-	-	-0.057	0.0076	4.31e-14	0.953033
Cbm_Right_VIIIa	rs2696430	17	44338279	C	G	0.2282	-0.0566	0.0076	6.65e-14	0.909882	-	-	-	-
Cbm_Right_VIIIa	rs9912530	17	44836302	T	C	0.2701	-	-	-	-	-0.0553	0.0073	4.49e-14	0.9415
Cbm_Right_VIIIa	rs916888	17	44863133	T	C	0.7549	0.0482	0.0072	2.39e-11	0.682846	-	-	-	-
Cbm_Right_VIIIa	rs2635046	18	44728429	A	G	0.4989	-0.0427	0.0063	9.08e-12	0.742858	-	-	-	-
Cbm_Right_VIIIa	rs4519606	20	34324648	T	C	0.8292	-	-	-	-	-0.0517	0.0093	2.29e-08	0.543972
Cbm_Right_VIIIa	rs134016	22	28038356	A	G	0.8013	0.0435	0.0079	4.13e-08	0.312082	-	-	-	-
Cbm_Left_VIIIb	rs56318008	1	22470407	T	C	0.1467	-	-	-	-	0.0579	0.0093	5.57e-10	0.655975
Cbm_Left_VIIIb	rs2297657	1	53746595	A	T	0.6128	-0.0492	0.0065	3.15e-14	0.919365	-	-	-	-
Cbm_Left_VIIIb	rs17749164	1	231897207	T	C	0.5981	-	-	-	-	0.0393	0.0067	4.79e-09	0.52237
Cbm_Left_VIIIb	rs356997	2	60811776	C	G	0.6268	0.0375	0.0065	7.6e-09	0.394743	-	-	-	-
Cbm_Left_VIIIb	rs36064852	2	165320369	A	T	0.8835	-0.0536	0.0098	4.9e-08	0.295948	-	-	-	-
Cbm_Left_VIIIb	rs939643	2	165387977	T	G	0.4262	0.0733	0.0064	8.09e-31	1	-	-	-	-
Cbm_Left_VIIIb	rs6759238	2	218536449	A	G	0.5626	-0.0376	0.0069	4.81e-08	0.452376	-	-	-	-
Cbm_Left_VIIIb	rs13071861	3	58371332	C	G	0.8438	-	-	-	-	0.0498	0.009	3.34e-08	0.387401
Cbm_Left_VIIIb	rs12648271	4	56368122	C	G	0.2707	-	-	-	-	0.0475	0.0074	1.24e-10	0.720245
Cbm_Left_VIIIb	rs36094018	4	68011263	A	C	0.5259	0.0485	0.0063	1.1e-14	0.929603	-	-	-	-
Cbm_Left_VIIIb	rs34723698	4	102581150	A	G	0.0125	-	-	-	-	0.1742	0.0298	4.9e-09	0.523617
Cbm_Left_VIIIb	rs12511373	4	102666785	T	C	0.0966	-	-	-	-	0.082	0.0113	3.66e-13	0.928982
Cbm_Left_VIIIb	rs151384	4	103115430	T	C	0.4916	-	-	-	-	0.0371	0.0066	1.95e-08	0.440558
Cbm_Left_VIIIb	rs11941622	4	103147822	A	C	0.5289	-	-	-	-	-0.0399	0.007	1.26e-08	0.595517
Cbm_Left_VIIIb	rs13107325	4	103188709	T	C	0.0713	-	-	-	-	0.2043	0.0128	2.8e-57	1
Cbm_Left_VIIIb	rs1462947	4	103228545	A	G	0.3277	-	-	-	-	-0.0434	0.0071	8.73e-10	0.64524
Cbm_Left_VIIIb	rs6872083	5	39418421	A	G	0.7121	0.0405	0.007	7.22e-09	0.417003	-	-	-	-
Cbm_Left_VIIIb	rs10074318	5	112436568	A	G	0.3212	-	-	-	-	-0.0423	0.0071	2.27e-09	0.577782
Cbm_Left_VIIIb	rs2617969	5	167531551	A	G	0.0714	0.0679	0.0122	2.91e-08	0.324969	-	-	-	-
Cbm_Left_VIIIb	rs1021786	6	8331082	T	C	0.2991	0.0391	0.0068	9.9e-09	0.369163	-	-	-	-
Cbm_Left_VIIIb	rs2184583	6	8447808	A	G	0.4232	-0.0377	0.0063	2.36e-09	0.449458	-	-	-	-
Cbm_Left_VIIIb	rs72831708	6	8730954	T	G	0.0626	-0.2121	0.013	2.79e-60	1	-0.116	0.0136	1.17e-17	0.995125
Cbm_Left_VIIIb	rs1800562	6	26093141	A	G	0.0762	-	-	-	-	-0.0888	0.0124	8.15e-13	0.899127
Cbm_Left_VIIIb	rs41266839	6	26409890	C	G	0.1091	-	-	-	-	0.0651	0.0105	5.83e-10	0.637052
Cbm_Left_VIIIb	rs66941101	6	26530376	T	C	0.1205	0.061	0.0096	2.23e-10	0.589162	-	-	-	-
Cbm_Left_VIIIb	rs183280845	6	26921528	A	G	0.1107	-	-	-	-	0.0615	0.0104	3.85e-09	0.525759
Cbm_Left_VIIIb	rs3823427	6	27256346	C	G	0.2425	0.0444	0.0073	1.52e-09	0.495348	-	-	-	-
Cbm_Left_VIIIb	rs9393908	6	28190830	A	T	0.152	0.0558	0.0087	1.74e-10	0.608528	-	-	-	-
Cbm_Left_VIIIb	rs1233618	6	28742850	A	G	0.1181	0.0568	0.0097	5.25e-09	0.416233	-	-	-	-
Cbm_Left_VIIIb	rs3749971	6	29342775	A	G	0.1233	0.0531	0.0095	2.64e-08	0.322357	-	-	-	-
Cbm_Left_VIIIb	rs1548306	6	32427179	A	T	0.3412	0.0373	0.0066	1.88e-08	0.345888	-	-	-	-
Cbm_Left_VIIIb	rs3813498	6	108944165	T	C	0.8117	-	-	-	-	0.0482	0.0084	8.7e-09	0.475042
Cbm_Left_VIIIb	rs1337735	6	126771024	A	T	0.4547	0.036	0.0063	9.3e-09	0.371701	-	-	-	-
Cbm_Left_VIIIb	rs7788313	7	15632807	T	C	0.1816	0.047	0.0081	7.53e-09	0.392777	-	-	-	-
Cbm_Left_VIIIb	rs4719564	7	19549162	A	C	0.3552	-	-	-	-	0.0448	0.0074	1.61e-09	0.750985
Cbm_Left_VIIIb	rs4595016	7	45992015	T	C	0.4419	0.0363	0.0064	1.52e-08	0.382684	-	-	-	-
Cbm_Left_VIIIb	rs221786	7	100266081	T	C	0.1091	-0.0572	0.0101	1.5e-08	0.361684	-	-	-	-
Cbm_Left_VIIIb	rs17286505	7	103326246	C	G	0.4847	0.0475	0.0063	5.79e-14	0.909202	0.04	0.0066	1.44e-09	0.603878
Cbm_Left_VIIIb	rs1627863	7	103402076	T	G	0.3766	-	-	-	-	-0.0549	0.0068	7e-16	0.984428
Cbm_Left_VIIIb	rs4729930	7	103415112	A	G	0.5995	0.0389	0.0065	1.86e-09	0.498928	-	-	-	-
Cbm_Left_VIIIb	rs10215000	7	156084177	A	G	0.5823	0.0449	0.0064	1.71e-12	0.810392	-	-	-	-
Cbm_Left_VIIIb	rs6993709	8	77671720	T	C	0.8524	0.0567	0.0088	1.42e-10	0.617105	-	-	-	-
Cbm_Left_VIIIb	rs11997784	8	78646058	T	C	0.654	0.0412	0.0066	4.77e-10	0.560049	-	-	-	-
Cbm_Left_VIIIb	rs17602898	9	76232858	T	C	0.029	-0.2372	0.0188	1.94e-36	1	-0.1309	0.0197	2.98e-11	0.796285
Cbm_Left_VIIIb	rs72754248	9	119061396	A	G	0.0706	0.0809	0.0122	3.86e-11	0.681817	-	-	-	-
Cbm_Left_VIIIb	rs35872193	12	102442428	A	T	0.7931	-0.0557	0.0078	8.88e-13	0.841187	-	-	-	-
Cbm_Left_VIIIb	rs17882461	12	102863979	A	T	0.7775	-	-	-	-	-0.0527	0.0079	2.59e-11	0.792489
Cbm_Left_VIIIb	rs76169231	12	102942969	T	C	0.7961	-0.0476	0.0078	8.15e-10	0.512259	-	-	-	-
Cbm_Left_VIIIb	rs12146713	12	106476805	T	C	0.9044	0.0943	0.0106	7.11e-19	0.993395	-	-	-	-
Cbm_Left_VIIIb	rs12306634	12	129679574	C	G	0.6441	-0.0362	0.0066	3.98e-08	0.309514	-	-	-	-
Cbm_Left_VIIIb	rs7989687	13	103909828	C	G	0.1875	0.0612	0.008	2.82e-14	0.915943	-	-	-	-
Cbm_Left_VIIIb	rs76675841	14	57620783	T	C	0.8515	-0.0559	0.0089	3.17e-10	0.59133	-	-	-	-
Cbm_Left_VIIIb	rs3784264	15	58250246	T	G	0.5778	0.0473	0.0064	1.44e-13	0.890271	-	-	-	-
Cbm_Left_VIIIb	rs62002749	15	61068836	A	G	0.4777	-0.0368	0.0064	7.29e-09	0.421913	-	-	-	-
[truncated: 986 more rows]

## Sheet: TableS6
Table S6. The PGS predictive performance of 30 cerebellar substructure volumes obtained by two segmentation methods in three target datasets.
Cerebellar volumetric traits	ABCDEUR								CHIMGENEAS								ABCDAFR
	CerebNet				SUIT+FS				CerebNet				SUIT+FS				CerebNet				SUIT+FS
	Threshold	PGS.R2	P	Num_SNP	Threshold	PGS.R2	P	Num_SNP	Threshold	PGS.R2	P	Num_SNP	Threshold	PGS.R2	P	Num_SNP	Threshold	PRS.R2	P	Num_SNP	Threshold	PRS.R2	P	Num_SNP
Left-Cerebellum-White-Matter	5.005e-05	0.0405984	6.1494e-54	610	0.00060005	0.0233522	1.66213e-31	2226	0.00040005	0.0177087	2.67009e-29	421	0.0305501	0.0103076	1.1552e-17	6222	0.00020005	0.00131511	0.0370659	1318	0.4923	0.00176819	0.0156086	332872
Right-Cerebellum-White-Matter	0.00010005	0.0407029	4.48436e-54	860	0.00015005	0.0243235	9.22431e-33	830	0.00060005	0.0207591	4.15732e-34	506	1	0.00968194	1.11135e-16	75348	0.0627501	0.00131386	0.0371564	74399	0.0162501	0.00256049	0.00361142	24657
Left-Cerebellum-Cortex	5.005e-05	0.0670476	4.44557e-89	620	0.00275005	0.061716	6.02063e-82	7404	5.005e-05	0.0213933	4.14869e-35	249	0.0291001	0.0210306	1.5502e-34	6384	5.005e-05	0.0325852	1.28798e-25	681	0.0208001	0.0298362	1.46283e-23	31761
Right-Cerebellum-Cortex	0.00030005	0.0611029	4.24828e-81	1669	0.0105001	0.0520157	5.13249e-69	20567	5.005e-05	0.0251117	5.50082e-41	233	0.00630005	0.0194121	5.5338e-32	2161	0.00010005	0.0307436	3.07102e-24	936	0.00580005	0.0255306	2.379e-20	11939
Cbm_Vermis	0.00015005	0.0709257	2.60192e-94	1140	5e-08	0.00262553	9.82156e-05	44	0.00020005	0.0274066	1.27101e-44	348	5.005e-05	0.00789753	7.10895e-14	123	0.00030005	0.0042647	0.000171609	1761	0.0303501	0.00218644	0.0071659	40616
Cbm_Left_I_IV	0.00015005	0.02398	2.62854e-32	844	0.00065005	0.000579529	0.0674035	2173	0.00025005	0.0114864	1.62343e-19	244	0.0979001	0.00620264	3.32775e-11	15096	0.3456	0.00420444	0.00019086	262498	0.4085	0.00118589	0.047716	294573
Cbm_Right_I_IV	0.00285005	0.0295059	1.82573e-39	7362	0.00190005	0.000970015	0.0179584	4781	5.005e-05	0.0136317	6.91057e-23	110	0.1228	0.00591205	9.56859e-11	17866	0.3174	0.00327053	0.00100294	247718	0.00075005	0.00158389	0.0221165	2004
Cbm_Left_V	5.005e-05	0.0307008	5.12045e-41	466	0.00205005	0.00131741	0.00581378	5096	5.005e-05	0.0111048	6.45678e-19	132	0.00095005	0.00416702	5.55683e-08	436	0.00010005	0.00279406	0.00236366	705	1	0.00104696	0.0628519	479824
Cbm_Right_V	5.005e-05	0.0264756	1.55186e-35	469	0.00055005	0.000189043	0.296255	1806	0.00050005	0.013358	1.8611e-22	385	0.00980005	0.00485211	4.54309e-09	2365	0.00015005	0.00240172	0.00482543	844	0.00280005	0.0011845	0.0478474	5774
Cbm_Left_VI	0.00010005	0.0697476	1.01667e-92	882	5e-08	0.00311637	2.19598e-05	28	0.00020005	0.0336925	1.2807e-54	376	0.0812001	0.00518271	1.36078e-09	13094	0.00070005	0.00365461	0.000505465	2849	0.00045005	0.000595326	0.16074	1626
Cbm_Right_VI	0.00010005	0.0790576	2.36357e-105	861	5e-08	0.00604991	3.26715e-09	31	0.00010005	0.0305467	1.31039e-49	272	0.0516001	0.00816664	2.68151e-14	9190	5.005e-05	0.00332967	0.000902242	678	0.00480005	0.00103104	0.0648878	9383
Cbm_Left_CrusI	5.005e-05	0.095351	9.09704e-128	685	0.0624001	0.00563226	1.13597e-08	80167	0.00020005	0.023802	6.49431e-39	399	0.00250005	0.0147285	1.30461e-24	1039	0.00120005	0.00920793	3.23546e-08	4179	5e-08	0.0026782	0.00291576	76
Cbm_Right_CrusI	5.005e-05	0.0900675	1.86495e-120	671	0.1933	0.00478587	1.42869e-07	188557	0.00035005	0.0285239	2.14443e-46	474	5.005e-05	0.0131005	4.7239e-22	150	5e-08	0.00624129	5.41818e-06	162	5e-08	0.0033429	0.000881151	85
Cbm_Left_CrusII	5.005e-05	0.0508176	2.09567e-67	553	0.0269501	0.00801661	9.41074e-12	41931	0.00030005	0.0173838	8.66971e-29	380	0.00495005	0.0119733	2.78936e-20	1708	5e-08	0.00971099	1.36338e-08	91	5e-08	0.00494689	5.17453e-05	79
Cbm_Right_CrusII	5.005e-05	0.0579765	6.39026e-77	534	0.0128501	0.00725683	8.99203e-11	23255	0.00050005	0.0213858	4.26298e-35	483	0.00135005	0.0105763	4.36977e-18	774	5e-08	0.00478263	6.90113e-05	101	0.00010005	0.00311436	0.00132703	796
Cbm_Left_VIIb	5e-08	0.0308338	3.43894e-41	45	0.145	0.000321895	0.172879	151794	0.00020005	0.00955254	1.77516e-16	210	0.00095005	0.0104201	7.6889e-18	540	0.00185005	0.000802109	0.103495	4658	5e-08	0.000394887	0.253344	60
Cbm_Right_VIIb	0.00010005	0.034666	3.52334e-46	675	0.00135005	0.00116541	0.00948612	3894	0.0204001	0.00853417	7.08416e-15	4645	0.00045005	0.0109702	1.05087e-18	387	5e-08	0.00135228	0.0344882	73	5e-08	0.00140948	0.0308812	61
Cbm_Left_VIIIa	0.00010005	0.0294346	2.25964e-39	642	0.3893	0.00174031	0.00152244	303636	0.00130005	0.0079552	5.76851e-14	690	0.00230005	0.00325417	1.58961e-06	876	0.00010005	0.00203166	0.00954181	676	0.0141001	0.000441784	0.226968	21336
Cbm_Right_VIIIa	5.005e-05	0.0216713	2.52057e-29	471	0.3303	0.00199855	0.000679588	272392	0.00025005	0.0100753	2.67704e-17	306	0.1126	0.0069528	2.18443e-12	16715	0.00020005	0.00188834	0.0124608	1004	0.00855005	0.000818792	0.0999711	14078
Cbm_Left_VIIIb	0.00010005	0.0175414	5.30122e-24	625	5e-08	0.00219946	0.000364477	29	0.0133501	0.00661882	7.34038e-12	3264	0.00095005	0.00424793	4.1323e-08	470	0.00120005	0.00369559	0.000469956	3139	0.1299	0.00129665	0.0384207	126615
Cbm_Right_VIIIb	5e-08	0.0211778	1.09235e-28	34	5e-08	0.00271805	7.39879e-05	29	0.0827501	0.00498369	2.81118e-09	13555	0.2195	0.0032156	1.83266e-06	27741	0.0190001	0.0005826	0.165286	27769	0.00425005	0.000608883	0.156052	7889
Cbm_Left_IX	5.005e-05	0.127629	2.23685e-173	691	0.00035005	0.00384827	2.39416e-06	1417	0.00010005	0.0345496	5.49512e-56	285	5e-08	0.00857628	6.0822e-15	25	0.00015005	0.0137348	1.38457e-11	1239	0.00020005	0.0045857	9.75208e-05	955
Cbm_Right_IX	5.005e-05	0.0998682	4.72182e-134	645	0.0725001	0.000152698	0.34787	90122	5.005e-05	0.0281366	8.83416e-46	234	0.00030005	0.0102245	1.56039e-17	285	5.005e-05	0.007668	4.58735e-07	748	0.00625005	0.00175824	0.0159033	11581
Cbm_Left_X	5e-08	0.0441539	1.31328e-58	50	0.00290005	0.00381588	2.6399e-06	6727	5.005e-05	0.0180104	8.94152e-30	126	0.00235005	0.00640477	1.59688e-11	852	0.00020005	0.00843249	1.22816e-07	958	0.00190005	0.00503295	4.45062e-05	4267
Cbm_Right_X	5e-08	0.052993	2.73545e-70	69	0.00030005	0.0020232	0.00062946	1107	0.00010005	0.0195	4.02196e-32	181	0.00390005	0.00405618	8.33998e-08	1213	0.0960501	0.00474737	7.34148e-05	101417	0.00010005	0.00259822	0.00337175	511
Cbm_Vermis_VI	0.00605005	0.0392407	3.69952e-52	13806	5.005e-05	0.00257515	0.00011462	393	0.00030005	0.0188086	4.94409e-31	366	0.0827501	0.00524018	1.10365e-09	13617	0.00080005	0.00152383	0.024799	2825	0.0169501	0.00177742	0.0153399	25524
Cbm_Vermis_VII	5e-08	0.0572969	5.14992e-76	68	5e-08	0.00782288	1.67281e-11	44	0.00015005	0.0207427	4.41265e-34	214	0.0575501	0.00507762	1.9959e-09	10101	0.00015005	0.0155324	6.40541e-13	914	5e-08	0.0078129	3.57259e-07	47
Cbm_Vermis_VIII	0.00010005	0.0864238	1.94429e-115	883	0.00020005	0.000943588	0.0195956	1008	0.00325005	0.0257781	4.84381e-42	1440	0.00030005	0.00660516	7.71359e-12	282	5e-08	0.00682796	1.95942e-06	130	5.005e-05	0.00148707	0.0266054	465
Cbm_Vermis_IX	0.00010005	0.0625893	4.33932e-83	781	5e-08	0.0310329	1.83567e-41	50	0.00095005	0.0258064	4.36844e-42	648	0.00040005	0.0055531	3.53135e-10	344	5.005e-05	0.00259557	0.00338806	560	5e-08	0.0089614	4.94311e-08	66
Cbm_Vermis_X	5.005e-05	0.0250946	9.51312e-34	355	0.4534	0.000663255	0.0503852	334590	0.00090005	0.00809533	3.47196e-14	417	0.00100005	0.00392923	1.32821e-07	471	0.00215005	0.00243542	0.00453698	4879	5.005e-05	0.000346698	0.284489	349
Abbereviations: ABCD, the Adolescent Brain Cognitive Development study; AFR, African ancestry; CHIMGEN, the Chinese Imaging Genetics study; EAS, East Asian ancestry; EUR, European ancestry; FS, FreeSurfer; Num_SNP, number of variants included in polygenetic score calculation; PGS.R2, r-square explained by polygenetic score; SUIT, spatially unbiased infra-tentorial; UKBB, the UK Biobank study.

## Sheet: TableS7
Table S7. The population straitification of each GWAS.
Cerebellar volumetric traits	UKBBEUR-GWAS						ABCDEUR-GWAS						CHIMGENEAS-GWAS						ABCDAFR-GWAS						EUR-GWAS						EUR-EAS-GWAS						EUR-EAS-AFR-GWAS
	All		Male		Female		All		Male		Female		All		Male		Female		All		Male		Female		All		Male		Female		All		Male		Female		All		Male		Female
	λGC	LDSC intercept	λGC	LDSC intercept	λGC	LDSC intercept	λGC	LDSC intercept	λGC	LDSC intercept	λGC	LDSC intercept	λGC	LDSC intercept	λGC	LDSC intercept	λGC	LDSC intercept	λGC	LDSC intercept	λGC	LDSC intercept	λGC	LDSC intercept	λGC	LDSC intercept	λGC	LDSC intercept	λGC	LDSC intercept	λGC	LDSC intercept	λGC	LDSC intercept	λGC	LDSC intercept	λGC	LDSC intercept	λGC	LDSC intercept	λGC	LDSC intercept
Left-Cerebellum-White-Matter	1.2267	1.0213	1.1301	1.0138	1.1333	1	1.0285	1.0037	1.0165	1.0054	1.0165	1.0094	1.0345	0.9875	1.0016	0.9907	1.0255	0.9898	1.0315	1.003	1.0405	1.055	1.0285	1.0439	1.2464	1.025	1.1459	1.0094	1.1523	1.0029	1.2597	1.0158	1.1459	1.0082	1.1715	0.998	1.2697	1.0418	1.1459	1.0141	1.1747	1.0027
Right-Cerebellum-White-Matter	1.2201	1.021	1.1238	1.0134	1.1364	1.0022	1.0315	0.9993	1.0165	1.0077	1.0165	1.0024	1.0405	0.9887	1.0046	0.9868	1.0255	1.0007	1.0345	0.9981	1.0405	1.0569	1.0436	1.0453	1.2332	1.0246	1.1428	1.0078	1.1523	1.0069	1.2464	1.0143	1.1428	1.008	1.1683	0.9973	1.2531	1.0445	1.1428	1.0146	1.1779	1.0069
Left-Cerebellum-Cortex	1.2299	1.0344	1.127	1.0147	1.127	1.0141	1.0315	1	1.0046	1.0085	0.9957	0.9828	1.0436	1.0056	1.0105	1.0067	1.0315	1.0024	1.0285	1.006	1.056	1.0496	1.0466	1.0431	1.2431	1.038	1.127	1.0147	1.127	1.0141	1.2431	1.0405	1.1491	1.013	1.1619	1.0216	1.2597	1.0648	1.1459	1.0236	1.1587	1.0245
Right-Cerebellum-Cortex	1.2267	1.0357	1.1207	1.0163	1.1333	1.0106	1.0345	1.0001	1.0075	1.0099	0.9957	0.983	1.0405	1.0091	1.0165	1.0113	1.0285	1.0055	1.0315	1.0062	1.0405	1.0498	1.0496	1.044	1.2431	1.0378	1.1207	1.0163	1.1333	1.0106	1.2498	1.0425	1.1459	1.0174	1.1651	1.0203	1.2564	1.0638	1.1364	1.0246	1.1651	1.0229
Cbm_Vermis	1.2398	1.0412	1.1396	1.019	1.1396	1.0249	1.0405	1.0046	1.0255	1.012	1.0135	0.999	1.0375	1.0188	1.0105	1.0069	1.0135	1.0132	1.0375	1.0138	1.0772	1.0533	1.1113	1.0582	1.2564	1.0412	1.1396	1.019	1.1396	1.0249	1.2697	1.0334	1.1619	1.0144	1.1715	1.0252	1.2764	1.0388	1.1619	1.018	1.1811	1.0319
Cbm_total	1.2332	1.0377	1.127	1.0182	1.1333	1.0121	1.0255	1.0009	1.0075	1.0133	0.9986	0.9854	1.0436	1.0062	1.0165	1.0044	1.0285	1.0054	1.0225	1.0064	1.0436	1.0513	1.0588	1.0462	1.2464	1.0395	1.127	1.0182	1.1333	1.0121	1.2498	1.0388	1.1491	1.0154	1.1715	1.0185	1.2597	1.0489	1.1459	1.0239	1.1715	1.0232
Cbm_Left_I_IV	1.1747	1.0205	1.0802	1.0068	1.1019	1.0117	1.0285	0.9993	1.0105	0.9985	1.0046	1.0043	1.0375	1.0076	1.0225	0.9969	1.0345	1.0124	1.0315	0.9989	1.0255	1.0572	1.0046	1.017	1.1876	1.0212	1.0926	1.0059	1.1175	1.0135	1.207	1.0214	1.105	1.0009	1.127	1.0188	1.2136	1.0315	1.1175	1.006	1.127	1.0178
Cbm_Right_I_IV	1.1747	1.0236	1.0864	1.0012	1.0988	1.0189	1.0285	1.0012	1.0105	0.9943	0.9986	1.0035	1.0375	1.0069	1.0135	0.9966	1.0315	1.0259	1.0285	1.0067	1.0345	1.0557	0.9957	1.016	1.1908	1.0247	1.1019	1.0003	1.1144	1.0202	1.207	1.0169	1.105	0.9929	1.127	1.013	1.2136	1.0296	1.1113	1.0011	1.1207	1.0131
Cbm_Left_V	1.1843	1.0222	1.0988	1.0032	1.1113	1.0078	1.0255	1.0104	1.0165	0.9939	1.0105	1.0084	1.0436	1.0034	1.0075	1.0026	1.0225	1.0244	1.0285	1.0091	1.0165	1.0274	0.9986	1.0255	1.2005	1.0214	1.1082	1.0013	1.1301	1.0119	1.2168	1.0211	1.1144	0.9976	1.1396	1.0122	1.2234	1.0278	1.1144	0.9972	1.1459	1.009
Cbm_Right_V	1.1876	1.0307	1.1082	1.0123	1.1082	1.0173	1.0135	1.0152	1.0135	1.0121	1.0165	1.0093	1.0496	1.0151	1.0195	0.9962	1.0345	1.0279	1.0165	1.0169	1.0285	1.0382	1.0105	1.0393	1.2038	1.0318	1.1207	1.0173	1.127	1.0201	1.2201	1.0268	1.1175	1.0126	1.1428	1.0211	1.2168	1.0324	1.127	1.0111	1.1428	1.0168
Cbm_Left_VI	1.2299	1.0401	1.127	1.0195	1.1333	1.0095	1.0405	1.0098	1.0225	1.011	1.0315	0.9991	1.0405	0.9992	1.0225	0.9968	1.0436	1.0006	1.0345	1.0151	1.0527	1.0635	0.9927	1.0301	1.2464	1.0432	1.1396	1.022	1.1459	1.016	1.2498	1.0344	1.1428	1.0175	1.1587	1.0119	1.2597	1.0511	1.1459	1.0267	1.1555	1.0101
Cbm_Right_VI	1.2168	1.0391	1.1238	1.0199	1.1238	1.0081	1.0466	1.0123	1.0225	1.0044	1.0285	1.0086	1.0405	0.9949	1.0255	1.0071	1.0255	0.9969	1.0436	1.0153	1.0375	1.0549	1.0016	1.0389	1.2332	1.0424	1.1364	1.023	1.1459	1.0143	1.2498	1.0352	1.1491	1.0216	1.1619	1.0103	1.2564	1.0525	1.1428	1.0251	1.1651	1.0122
Cbm_Left_CrusI	1.2234	1.0347	1.1301	1.0074	1.1301	1.0084	1.0315	1.0028	0.9986	1.0016	1.0135	0.9889	1.0496	1.0081	1.0135	1.0111	1.0195	1.0026	1.0285	1.0111	1.0772	1.0621	1.0618	1.0532	1.2464	1.039	1.1428	1.0084	1.1587	1.0127	1.2564	1.0447	1.1523	1.0111	1.1683	1.0201	1.2597	1.0483	1.1523	1.0218	1.1619	1.0212
Cbm_Right_CrusI	1.2299	1.0363	1.1207	1.0123	1.127	1.0071	1.0135	0.9978	0.9986	0.9969	1.0105	0.9849	1.0512	1.024	1.0075	1.0231	1.0315	1.0127	1.0135	1.0025	1.0466	1.0616	1.0618	1.047	1.2464	1.0402	1.1333	1.0148	1.1555	1.0119	1.2631	1.045	1.1364	1.019	1.1715	1.0179	1.2697	1.0459	1.1364	1.0246	1.1683	1.015
Cbm_Left_CrusII	1.2038	1.0364	1.1113	1.0053	1.1207	1.0222	1.0255	1.0085	1.0016	1.0113	1.0195	0.995	1.0345	1.004	1.0075	0.9951	1.0285	1.0044	1.0225	1.0166	1.0315	1.0539	1.0557	1.0617	1.2201	1.0366	1.1333	1.0074	1.1428	1.028	1.2299	1.0396	1.1364	1.0094	1.1491	1.0231	1.2332	1.0549	1.1364	1.0154	1.1459	1.0318
Cbm_Right_CrusII	1.2103	1.0261	1.1113	1.0134	1.127	1.0177	1.0255	1.0165	0.9986	1.0133	1.0195	1.0101	1.0345	1.0062	1.0075	1.0128	1.0046	0.9917	1.0225	1.0296	1.0405	1.049	1.0496	1.0478	1.2234	1.0311	1.1301	1.0148	1.1364	1.0197	1.2267	1.031	1.1333	1.0127	1.1396	1.016	1.2332	1.0461	1.1301	1.0203	1.1364	1.0246
Cbm_Left_VIIb	1.1779	1.0231	1.105	1.0087	1.1019	1.0236	1.0225	1.0068	1.0225	1.0046	0.9957	1.0007	1.0016	0.9951	1.0046	1.0087	1.0195	0.9928	1.0225	1.0069	0.9986	1.0235	1.0195	1.026	1.2005	1.0281	1.1175	1.009	1.1175	1.0258	1.207	1.0302	1.1238	1.0119	1.1301	1.0276	1.2005	1.0336	1.1238	1.0122	1.127	1.0258
Cbm_Right_VIIb	1.1973	1.017	1.0988	1.0024	1.105	1.0145	1.0315	1.0114	1.0225	1.0136	0.9957	0.9924	1.0255	0.9991	1.0105	1.0109	1.0285	0.9931	1.0315	1.0146	0.9986	1.0269	1.0225	1.0339	1.207	1.0223	1.1175	1.0055	1.127	1.017	1.2267	1.0347	1.1301	1.0156	1.1428	1.0175	1.2267	1.039	1.1207	1.0122	1.1459	1.0202
Cbm_Left_VIIIa	1.1811	1.0183	1.0957	1.0073	1.105	1.0182	1.0255	1.0032	1.0135	0.9962	1.0285	1.0005	1.0195	0.9877	0.9957	0.9972	1.0345	1.0037	1.0255	1.0079	0.978	1.0143	1.0436	1.0527	1.1876	1.0196	1.1082	1.0053	1.127	1.0164	1.2005	1.0223	1.1175	1.0133	1.127	1.0188	1.2038	1.0332	1.1082	1.0084	1.1301	1.0171
Cbm_Right_VIIIa	1.1747	1.0226	1.0833	1.0153	1.1019	1.0192	1.0165	0.9989	1.0016	1.0016	1.0105	0.9991	1.0315	1.0033	1.0105	0.9981	1.0315	1.0016	1.0195	1.0041	0.9839	1.0183	1.0375	1.0492	1.1811	1.0234	1.0988	1.0128	1.127	1.0207	1.1973	1.0339	1.1019	1.0237	1.1238	1.0258	1.1908	1.0384	1.1019	1.0142	1.1238	1.0225
Cbm_Left_VIIIb	1.1683	1.0172	1.0957	1.009	1.0926	1.0086	1.0165	1.0041	1.0046	1.0035	1.0165	1.0002	1.0135	1.002	1.0135	1.0068	0.9957	0.9901	1.0165	1.0043	1.0105	1.0343	0.9898	1.0087	1.1715	1.0208	1.1082	1.011	1.1113	1.01	1.1843	1.02	1.1082	1.0104	1.1238	1.011	1.194	1.0287	1.105	1.0155	1.1207	1.0056
Cbm_Right_VIIIb	1.1619	1.0211	1.0864	1.0004	1.0895	1.0098	1.0285	1.0007	1.0135	0.9958	1.0135	1.0054	1.0165	1.0129	0.9986	1.0164	1.0195	1.0037	1.0285	1.0013	0.9839	1.0054	0.9809	1.014	1.1747	1.022	1.0926	1.0098	1.1113	1.0116	1.1843	1.0153	1.0988	1.0156	1.1144	1.0055	1.1779	1.02	1.0895	1.0148	1.1113	1.0036
Cbm_Left_IX	1.2267	1.0322	1.127	1.0157	1.1333	1.0219	1.0375	1.007	1.0195	0.9952	1.0165	0.9952	1.0496	1.0014	1.0165	1.0037	1.0165	0.9905	1.0345	1.0051	1.0315	1.056	1.0165	1.0383	1.2564	1.0353	1.1459	1.0213	1.1491	1.0178	1.2631	1.0281	1.1491	1.0192	1.1587	1.0147	1.2597	1.0384	1.1523	1.0208	1.1491	1.0145
Cbm_Right_IX	1.2201	1.0306	1.127	1.0163	1.1301	1.0191	1.0345	1.01	1.0165	1.0039	1.0105	0.9941	1.0255	0.9944	1.0105	0.9902	1.0075	0.9886	1.0375	1.0095	1.0375	1.0588	1.0315	1.0422	1.2431	1.0326	1.1428	1.0206	1.1491	1.0189	1.2498	1.0263	1.1491	1.0171	1.1523	1.0115	1.2531	1.034	1.1523	1.0169	1.1491	1.0125
Cbm_Left_X	1.1587	1.0156	1.0988	1.0133	1.1082	1.0158	1.0315	1.0081	1.0195	1.0056	1.0195	0.9982	1.0375	0.9866	0.9986	0.9976	1.0405	1.0013	1.0315	1.0079	1.0135	1.0469	1.0345	1.0436	1.1908	1.0236	1.1175	1.0151	1.1238	1.0229	1.2038	1.02	1.1301	1.0047	1.1301	1.0186	1.2168	1.0266	1.1207	1.0035	1.1301	1.0231
Cbm_Right_X	1.1811	1.0225	1.0988	1.0177	1.105	1.0165	1.0375	1.0051	1.0225	1.0002	1.0285	1.0001	1.0285	0.986	1.0135	0.9925	1.0285	0.9967	1.0436	1.0075	1.0436	1.048	1.0496	1.0546	1.207	1.0303	1.1113	1.0178	1.127	1.024	1.2201	1.0283	1.1175	1.0085	1.127	1.0192	1.2267	1.0324	1.127	1.0088	1.1238	1.0194
Cbm_Vermis_VI	1.2168	1.0314	1.1113	1.0148	1.1113	1.0125	1.0255	1.007	1.0075	0.9971	1.0195	1.0076	1.0436	1.0029	1.0195	1.0039	1.0375	0.9995	1.0225	1.0087	1.0168	1.0175	1.0973	1.011	1.2332	1.0342	1.1207	1.0109	1.1364	1.0192	1.2398	1.021	1.1301	1.0083	1.1491	1.0093	1.2431	1.0268	1.1396	1.0324	1.1651	1.0256
Cbm_Vermis_VII	1.1811	1.0347	1.0895	1.0356	1.1207	1.0155	1.0315	1.0129	1.0195	1.0092	1.0046	0.9939	1.0405	1.0034	1.0075	1.0047	1.0225	1.0006	1.0285	1.0135	1.0315	1.0423	1.1113	1.0544	1.194	1.0416	1.0957	1.0398	1.1301	1.0181	1.2103	1.0474	1.105	1.041	1.1364	1.0288	1.2234	1.0648	1.105	1.0384	1.1459	1.0361
Cbm_Vermis_VIII	1.2038	1.0439	1.1207	1.0265	1.1301	1.033	1.0588	1.0179	1.0405	1.0202	1.0255	1.0116	1.0135	1.0029	1.0255	1.0107	1.0075	0.9939	1.0557	1.03	1.0496	1.061	1.0135	1.0433	1.2332	1.0506	1.1333	1.0265	1.1523	1.0371	1.2498	1.0426	1.1459	1.0229	1.1651	1.0265	1.2597	1.0579	1.1491	1.0248	1.1651	1.0268
Cbm_Vermis_IX	1.2103	1.0365	1.1175	0.9987	1.1175	1.0233	1.0255	0.9978	1.0165	0.9979	1.0165	0.9996	1.0285	0.9923	0.9986	0.9916	1.0225	0.9929	1.0225	0.9988	1.0225	1.0519	1.0315	1.052	1.2267	1.0308	1.1396	1.003	1.1428	1.0291	1.2464	1.0158	1.1428	0.9936	1.1523	1.0213	1.2531	1.0235	1.1396	0.9979	1.1619	1.0218
Cbm_Vermis_X	1.1811	1.027	1.0988	1.01	1.1113	1.0104	1.0195	0.9982	1.0135	1.0037	1.0075	0.9994	1.0375	0.9958	1.0165	1.0063	1.0225	0.9906	1.0195	1.0033	1.0165	1.0418	1.0046	1.0449	1.1908	1.0236	1.1144	1.011	1.1144	1.0155	1.2168	1.0258	1.1207	1.0131	1.1238	1.0187	1.2168	1.0212	1.1207	1.006	1.1238	1.0157
Abbereviations: λGC, genomic control inflation factor; ABCD, the Adolescent Brain Cognitive Development study; AFR, African ancestry; CHIMGEN, the Chinese Imaging Genetics study; EAS, East Asian ancestry; EUR, European ancestry; GWAS, genome-wide association study; LDSC, linkage disequilibrium score regression; UKBB, the UK Biobank study.

## Sheet: TableS8
Table S8. Significant variant-trait associations and locus-trait associations in sex-combined single-dataset GWASs (P < 1.61 × 10-9).
GWAS	Cerebellar volumetric traits	Lead variants							Variant-trait associations				Annotation				Locus-trait associations
		RSID	CHR	POS	Band	A1	A2	AF1	No. (TnVn)	BETA	SE	P	Function	Nearest gene	ReculomeDB	CADD	No. (TnLn)	START	END
UKBBEUR	Left-Cerebellum-White-Matter	rs4400633	1	7054979	1p36.31	T	C	0.4872	T1V1	-0.0337	0.0052	1.182e-10	intronic	CAMTA1	5	3.298	T1L1	6811095	7106963
	Left-Cerebellum-White-Matter	rs2779490	1	76014288	1p31.1	T	C	0.1509	T1V2	-0.047	0.0073	1.315e-10	intronic	SLC44A5	1f	6.265	T1L2	75995505	76066504
	Left-Cerebellum-White-Matter	rs12122217	1	183545665	1q25.3	T	C	0.3297	T1V3	0.034	0.0055	8.505e-10	intronic	NCF2	1f	1.144	T1L3	183419203	183546061
	Left-Cerebellum-White-Matter	rs55795022	2	16386265	2p24.3	A	T	0.171	T1V4	-0.0524	0.0079	3.093e-11	intergenic	GACAT3(dist=160454),FAM49A(dist=344465)	2b	16.11	T1L4	16386265	16386265
	Left-Cerebellum-White-Matter	rs13388394	2	33764176	2p22.3	A	G	0.9583	T1V5	-0.1005	0.0131	1.488e-14	exonic (missense variant)	RASGRP3	1f	19.08	T1L5	33740855	33787773
	Left-Cerebellum-White-Matter	rs7593335	2	88878133	2p11.2	A	G	0.2871	T1V6	0.0383	0.0058	3.17e-11	intronic	EIF2AK3	6	3.398	T1L6	88870632	89093781
	Left-Cerebellum-White-Matter	rs2234675	2	223085955	2q36.1	T	G	0.0423	T1V7	-0.0935	0.0129	5.026e-13	exonic (missense variant)	PAX3	5	27.7	T1L7	223046616	223102579
	Left-Cerebellum-White-Matter	rs78094954	3	69881136	3p13	A	G	0.2137	T1V8	0.0415	0.0064	9.254e-11	intronic	MITF	4	0.959	T1L8	69844608	69909425
	Left-Cerebellum-White-Matter	rs2369291	4	4750362	4p16.2	T	C	0.4868	T1V9	0.0325	0.0053	6.699e-10	intergenic	STX18-AS1(dist=37698),LOC101928279(dist=13125)	2b	3.932	T1L9	4744339	4762383
	Left-Cerebellum-White-Matter	rs2251913	5	112135737	5q22.2	A	G	0.5072	T1V10	-0.0323	0.0052	7.119e-10	intronic	APC	1d	2.221	T1L10	111988946	112184490
	Left-Cerebellum-White-Matter	rs72829213	6	7864764	6p24.3	T	C	0.0902	T1V11	0.0599	0.0091	6.048e-11	intronic	BMP6	1f	0.181	T1L11	7864764	7898147
	Left-Cerebellum-White-Matter	rs2153960	6	108988184	6q21	A	G	0.7075	T1V12	0.0521	0.0057	6.208e-20	intronic	FOXO3	1f	7.289	T1L12	108861264	109020332
	Left-Cerebellum-White-Matter	rs12193486	6	158650678	6q25.3	C	G	0.1437	T1V13	-0.0457	0.0075	1.192e-09	intergenic	GTF2H5(dist=30302),TULP4(dist=82819)	1f	1.249	T1L13	158649353	158695579
	Left-Cerebellum-White-Matter	rs7808836	7	23474325	7p15.3	T	C	0.3796	T1V14	-0.036	0.0054	2.284e-11	intronic	IGF2BP3	1b	1.408	T1L14	23474325	23524225
	Left-Cerebellum-White-Matter	rs12536500	7	50808033	7p12.1	T	C	0.2495	T1V15	-0.046	0.006	2.349e-14	intronic	GRB10	1f	7.681	T1L15	50734630	50882081
	Left-Cerebellum-White-Matter	rs3801382	7	120998277	7q31.31	T	G	0.7181	T1V16	0.0471	0.0058	5.483e-16	intronic	FAM3C	7	6.569	T1L16	120924338	121040782
	Left-Cerebellum-White-Matter	rs6994577	8	24743002	8p21.2	A	G	0.7521	T1V17	-0.0502	0.0061	1.428e-16	intergenic	LOC101929294(dist=336871),NEFM(dist=28272)	6	6.884	T1L17	24677132	25428593
	Left-Cerebellum-White-Matter	rs55796651	8	25349240	8p21.2	T	C	0.2574	T1V18	-0.0366	0.006	1.015e-09	intronic	CDCA2	1f	3.765
	Left-Cerebellum-White-Matter	rs416459	9	14462868	9p22.3	A	T	0.2855	T1V19	-0.0355	0.0058	7.934e-10	intronic	NFIB	2b	6.28	T1L18	14458638	14464863
	Left-Cerebellum-White-Matter	rs985223	9	118935817	9q33.1	A	G	0.6095	T1V20	-0.0599	0.0054	8.959e-29	intronic	PAPPA	4	1.769
	Left-Cerebellum-White-Matter	rs35565319	9	119065043	9q33.1	T	C	0.0706	T1V21	0.1231	0.0102	1.251e-33	exonic (synonymous variant)	PAPPA	5	18.29	T1L19	118918479	119475712
	Left-Cerebellum-White-Matter	rs2416563	9	119354783	9q33.1	A	G	0.4621	T1V22	0.0392	0.0052	6.781e-14	intronic	ASTN2	1f	1.839
	Left-Cerebellum-White-Matter	rs6484290	11	10470852	11p15.4	A	G	0.5338	T1V23	0.0342	0.0053	8.42e-11	intergenic	CAND1.11(dist=18632),AMPD3(dist=1016)	7	3.116	T1L20	10458596	10491741
	Left-Cerebellum-White-Matter	rs10778142	12	102093698	12q23.2	A	C	0.7458	T1V24	-0.0379	0.0061	7.279e-10	intronic	CHPT1	1f	4.015
	Left-Cerebellum-White-Matter	rs11111090	12	102326461	12q23.2	A	C	0.5206	T1V25	0.0852	0.0052	1.585e-59	intergenic	DRAM1(dist=9071),WASHC3(dist=80157)	1f	3.741	T1L21	102080847	102966394
	Left-Cerebellum-White-Matter	rs76666326	12	102331923	12q23.2	T	G	0.0833	T1V26	0.0652	0.0095	6.306e-12	intergenic	DRAM1(dist=14533),WASHC3(dist=74695)	1f	5.792
	Left-Cerebellum-White-Matter	rs4611262	12	102502759	12q23.2	T	C	0.2193	T1V27	-0.0417	0.0064	5.905e-11	intronic	NUP37	6	4.006
	Left-Cerebellum-White-Matter	rs187441419	12	102532378	12q23.2	C	G	0.0072	T1V28	-0.2223	0.0309	6.321e-13	intronic	PARPBP	6	0.046
	Left-Cerebellum-White-Matter	rs1533688	12	102772745	12q23.2	T	C	0.2247	T1V29	0.0438	0.0063	2.667e-12	intergenic	PMCH(dist=181134),IGF1(dist=16907)	7	13.75
	Left-Cerebellum-White-Matter	rs11111278	12	102846020	12q23.2	A	G	0.7921	T1V30	-0.0875	0.0065	7.966e-42	intronic	IGF1	7	2.401
	Left-Cerebellum-White-Matter	rs703547	12	102943707	12q23.2	C	G	0.8419	T1V31	0.0497	0.0072	6.224e-12	intergenic	IGF1(dist=69366),LINC00485(dist=259354)	4	0.477
	Left-Cerebellum-White-Matter	rs7135687	12	102962922	12q23.2	T	G	0.4667	T1V32	0.0393	0.0064	6.908e-10	intergenic	IGF1(dist=88581),LINC00485(dist=240139)	5	7.16
	Left-Cerebellum-White-Matter	rs1011173	15	78498947	15q25.1	A	G	0.1014	T1V33	0.0583	0.0087	2.324e-11	intronic	ACSBG1	1b	0.32	T1L22	78498947	78502550
	Left-Cerebellum-White-Matter	rs62073257	17	44412076	17q21.31	A	G	0.7948	T1V34	0.0585	0.0066	9.908e-19	intronic	ARL17A,ARL17B,LRRC37A	7	10.44	T1L23	43463493	44865603
	Left-Cerebellum-White-Matter	rs9948347	18	35270126	18q12.2	T	C	0.709	T1V35	-0.0356	0.0058	7.037e-10	intergenic	MIR4318(dist=32948),MIR924HG(dist=1516762)	5	3.704	T1L24	35186448	35351877
	Left-Cerebellum-White-Matter	rs73429770	18	38007071	18q12.3	A	G	0.1763	T1V36	0.056	0.0068	2.795e-16	intergenic	LINC01477(dist=327874),KC6(dist=1053165)	6	0.707	T1L25	37941245	38289308
	Left-Cerebellum-White-Matter	rs470546	18	74696425	18q23	A	G	0.1545	T1V37	0.059	0.0072	3.225e-16	intronic	MBP	1f	1.324	T1L26	74500087	74704973
	Left-Cerebellum-White-Matter	rs1886693	20	33986566	20q11.22	C	G	0.5959	T1V38	-0.0346	0.0056	5.844e-10	intronic	UQCC1	2b	1.512	T1L27	33890061	34419083
	Left-Cerebellum-White-Matter	rs28368435	22	46406695	22q13.31	A	G	0.3815	T1V39	0.0347	0.0054	1.05e-10	downstream	LOC730668(dist=38)	1f	0.064	T1L28	46397854	46409177
	Right-Cerebellum-White-Matter	rs4400633	1	7054979	1p36.31	T	C	0.4872	T2V1	-0.0358	0.0052	7.704e-12	intronic	CAMTA1	5	3.298	T2L1	6811095	7106963
	Right-Cerebellum-White-Matter	rs2779490	1	76014288	1p31.1	T	C	0.1509	T2V2	-0.0473	0.0073	1.04e-10	intronic	SLC44A5	1f	6.265	T2L2	75995505	76052392
	Right-Cerebellum-White-Matter	rs12122217	1	183545665	1q25.3	T	C	0.3297	T2V3	0.0337	0.0055	1.09e-09	intronic	NCF2	1f	1.144	T2L3	183419203	183546061
	Right-Cerebellum-White-Matter	rs7523102	1	243672074	1q43	T	C	0.2661	T2V4	0.0362	0.006	1.34e-09	intronic	AKT3	4	1.272	T2L4	243664642	243672074
	Right-Cerebellum-White-Matter	rs55795022	2	16386265	2p24.3	A	T	0.171	T2V5	-0.0568	0.0079	5.819e-13	intergenic	GACAT3(dist=160454),FAM49A(dist=344465)	2b	16.11	T2L5	16386265	16386265
	Right-Cerebellum-White-Matter	rs13388394	2	33764176	2p22.3	A	G	0.9583	T2V6	-0.0969	0.0131	1.225e-13	exonic (missense variant)	RASGRP3	1f	19.08	T2L6	33740855	33787773
	Right-Cerebellum-White-Matter	rs7593335	2	88878133	2p11.2	A	G	0.2871	T2V7	0.037	0.0058	1.365e-10	intronic	EIF2AK3	6	3.398	T2L7	88870632	89078241
	Right-Cerebellum-White-Matter	rs2234675	2	223085955	2q36.1	T	G	0.0423	T2V8	-0.0976	0.0129	4.565e-14	exonic (missense variant)	PAX3	5	27.7	T2L8	223046616	223102579
	Right-Cerebellum-White-Matter	rs78094954	3	69881136	3p13	A	G	0.2137	T2V9	0.0401	0.0064	3.677e-10	intronic	MITF	4	0.959	T2L9	69844608	69898414
	Right-Cerebellum-White-Matter	rs2369291	4	4750362	4p16.2	T	C	0.4868	T2V10	0.0332	0.0053	2.862e-10	intergenic	STX18-AS1(dist=37698),LOC101928279(dist=13125)	2b	3.932	T2L10	4744339	4762383
	Right-Cerebellum-White-Matter	rs2251913	5	112135737	5q22.2	A	G	0.5072	T2V11	-0.0317	0.0052	1.448e-09	intronic	APC	1d	2.221	T2L11	112006815	112181379
	Right-Cerebellum-White-Matter	rs72829213	6	7864764	6p24.3	T	C	0.0902	T2V12	0.0558	0.0091	1.022e-09	intronic	BMP6	1f	0.181	T2L12	7864764	7898147
	Right-Cerebellum-White-Matter	rs76054911	6	27285365	6p22.1	T	C	0.069	T2V13	0.0641	0.0103	4.237e-10	intergenic	POM121L2(dist=5354),VN1R10P(dist=7175)	1f	2.061	T2L13	27285365	27285365
	Right-Cerebellum-White-Matter	rs4946935	6	109000742	6q21	A	G	0.2871	T2V14	-0.0511	0.0058	8.962e-19	intronic	FOXO3	1f	2.08	T2L14	108861264	109020332
	Right-Cerebellum-White-Matter	rs7808836	7	23474325	7p15.3	T	C	0.3796	T2V15	-0.0356	0.0054	3.759e-11	intronic	IGF2BP3	1b	1.408	T2L15	23474325	23524225
	Right-Cerebellum-White-Matter	rs12536500	7	50808033	7p12.1	T	C	0.2495	T2V16	-0.047	0.006	6.542e-15	intronic	GRB10	1f	7.681	T2L16	50734630	50882081
	Right-Cerebellum-White-Matter	rs3801382	7	120998277	7q31.31	T	G	0.7181	T2V17	0.0487	0.0058	5.72e-17	intronic	FAM3C	7	6.569	T2L17	120924338	121040782
	Right-Cerebellum-White-Matter	rs2874306	8	24746311	8p21.2	A	G	0.7357	T2V18	-0.0372	0.0059	3.906e-10	intergenic	LOC101929294(dist=340180),NEFM(dist=24963)	6	0.123
	Right-Cerebellum-White-Matter	rs2976443	8	24806842	8p21.2	C	G	0.7664	T2V19	-0.0501	0.0062	5.974e-16	intergenic	NEFM(dist=30236),NEFL(dist=1627)	1b	1.267	T2L18	24677132	24853843
	Right-Cerebellum-White-Matter	rs1160248	9	118944239	9q33.1	T	C	0.6121	T2V20	-0.0584	0.0054	1.851e-27	intronic	PAPPA	4	7.023
	Right-Cerebellum-White-Matter	rs35565319	9	119065043	9q33.1	T	C	0.0706	T2V21	0.12	0.0102	4.562e-32	exonic (synonymous variant)	PAPPA	5	18.29	T2L19	118918479	119482585
	Right-Cerebellum-White-Matter	rs2416563	9	119354783	9q33.1	A	G	0.4621	T2V22	0.0403	0.0052	1.179e-14	intronic	ASTN2	1f	1.839
	Right-Cerebellum-White-Matter	rs4752582	10	123443605	10q26.13	A	G	0.9247	T2V23	-0.0631	0.0099	1.962e-10	intergenic	FGFR2(dist=85633),ATE1(dist=56331)	1f	12.79	T2L20	123443605	123443605
	Right-Cerebellum-White-Matter	rs11605232	11	10468501	11p15.4	T	C	0.5321	T2V24	0.0353	0.0053	2.341e-11	intergenic	CAND1.11(dist=16281),AMPD3(dist=3367)	1f	0.082	T2L21	10458596	10491741
	Right-Cerebellum-White-Matter	rs10876041	12	50901882	12q13.12	T	C	0.3612	T2V25	-0.0334	0.0054	6.529e-10	intronic	DIP2B	1f	9.124	T2L22	50650057	51134741
	Right-Cerebellum-White-Matter	rs10778142	12	102093698	12q23.2	A	C	0.7458	T2V26	-0.0406	0.0061	3.767e-11	intronic	CHPT1	1f	4.015
	Right-Cerebellum-White-Matter	rs61936575	12	102301915	12q23.2	T	C	0.8928	T2V27	-0.0562	0.0085	3.841e-11	intronic	DRAM1	1d	5.532
	Right-Cerebellum-White-Matter	rs11111090	12	102326461	12q23.2	A	C	0.5206	T2V28	0.087	0.0052	5.142e-62	intergenic	DRAM1(dist=9071),WASHC3(dist=80157)	1f	3.741	T2L23	102080847	102947650
	Right-Cerebellum-White-Matter	rs76666326	12	102331923	12q23.2	T	G	0.0833	T2V29	0.0609	0.0095	1.348e-10	intergenic	DRAM1(dist=14533),WASHC3(dist=74695)	1f	5.792
	Right-Cerebellum-White-Matter	rs144782470	12	102524505	12q23.2	T	C	0.0392	T2V30	-0.0925	0.0135	6.368e-12	intronic	PARPBP	5	0.601
	Right-Cerebellum-White-Matter	rs1533688	12	102772745	12q23.2	T	C	0.2247	T2V31	0.0429	0.0063	7.08e-12	intergenic	PMCH(dist=181134),IGF1(dist=16907)	7	13.75
	Right-Cerebellum-White-Matter	rs11111278	12	102846020	12q23.2	A	G	0.7921	T2V32	-0.0866	0.0065	5.282e-41	intronic	IGF1	7	2.401
	Right-Cerebellum-White-Matter	rs703547	12	102943707	12q23.2	C	G	0.8419	T2V33	0.0484	0.0072	2.057e-11	intergenic	IGF1(dist=69366),LINC00485(dist=259354)	4	0.477
	Right-Cerebellum-White-Matter	rs11068772	12	118441838	12q24.23	T	C	0.3792	T2V34	-0.0328	0.0054	1.037e-09	intergenic	KSR2(dist=35043),RFC5(dist=12628)	7	13.54	T2L24	118437058	118443690
	Right-Cerebellum-White-Matter	rs1011173	15	78498947	15q25.1	A	G	0.1014	T2V35	0.0589	0.0087	1.424e-11	intronic	ACSBG1	1b	0.32	T2L25	78498947	78502550
	Right-Cerebellum-White-Matter	rs112972619	17	43776425	17q21.31	T	C	0.2169	T2V36	-0.0545	0.0063	7.99e-18	intronic	LINC02210-CRHR1	5	0.176
	Right-Cerebellum-White-Matter	rs9912530	17	44836302	17q21.31	T	C	0.2701	T2V37	-0.0531	0.0059	1.938e-19	intergenic	NSF(dist=1474),WNT3(dist=3570)	1f	0.362	T2L26	43463493	44865603
	Right-Cerebellum-White-Matter	rs9948347	18	35270126	18q12.2	T	C	0.709	T2V38	-0.0361	0.0058	3.899e-10	intergenic	MIR4318(dist=32948),MIR924HG(dist=1516762)	5	3.704	T2L27	35138110	35330843
	Right-Cerebellum-White-Matter	rs73429770	18	38007071	18q12.3	A	G	0.1763	T2V39	0.0548	0.0068	1.115e-15	intergenic	LINC01477(dist=327874),KC6(dist=1053165)	6	0.707	T2L28	37989574	38334275
	Right-Cerebellum-White-Matter	rs12457908	18	74535018	18q23	A	G	0.1502	T2V40	0.0576	0.0073	3.729e-15	intronic	ZNF236	1f	4.163	T2L29	74500087	74704283
	Right-Cerebellum-White-Matter	rs1886693	20	33986566	20q11.22	C	G	0.5959	T2V41	-0.0346	0.0056	5.679e-10	intronic	UQCC1	2b	1.512	T2L30	33890061	34025983
	Right-Cerebellum-White-Matter	rs28368435	22	46406695	22q13.31	A	G	0.3815	T2V42	0.0337	0.0054	3.372e-10	downstream	LOC730668(dist=38)	1f	0.064	T2L31	46401657	46407286
	Left-Cerebellum-Cortex	rs74067851	1	40385375	1p34.2	T	C	0.8798	T3V1	0.0623	0.0086	3.688e-13	intergenic	MYCL(dist=17786),MFSD2A(dist=35409)	1f	14.11	T3L1	40303627	40385375
	Left-Cerebellum-Cortex	rs10888687	1	50861886	1p32.3	T	G	0.7967	T3V2	-0.0479	0.0069	2.743e-12	intergenic	ELAVL4(dist=192442),DMRTA2(dist=21336)	7	1.053
	Left-Cerebellum-Cortex	rs10888711	1	51397457	1p32.3	A	T	0.4252	T3V3	0.0446	0.0056	1.525e-15	intronic	FAF1	1f	2.789
	Left-Cerebellum-Cortex	rs72908878	1	51554925	1p32.3	A	G	0.9469	T3V4	-0.1334	0.0123	2.349e-27	intergenic	MIR6500(dist=29150),C1orf185(dist=12975)	1f	12.58	T3L2	50826176	52131542
	Left-Cerebellum-Cortex	rs2748444	1	76010959	1p31.1	T	C	0.8492	T3V5	0.0547	0.0077	1.701e-12	intronic	SLC44A5	1f	3.247	T3L3	75946751	76052392
	Left-Cerebellum-Cortex	rs240101	1	176547835	1q25.2	A	G	0.6295	T3V6	0.0431	0.0057	4.477e-14	intronic	PAPPA2	7	4.784	T3L4	176525194	176713613
	Left-Cerebellum-Cortex	rs144673025	1	223178026	1q41	T	C	0.993	T3V7	0.2251	0.0332	1.275e-11	exonic (missense variant)	DISP1	5	23.3	T3L5	223148387	223178026
	Left-Cerebellum-Cortex	rs76923341	1	227441351	1q42.13	A	T	0.1631	T3V8	0.0506	0.0077	4.072e-11	intronic	CDC42BPA	5	4.228	T3L6	227217725	227509822
	Left-Cerebellum-Cortex	rs9428576	1	243662027	1q43	T	C	0.5651	T3V9	-0.0402	0.0056	5.852e-13	intronic	AKT3,SDCCAG8	2b	0.174	T3L7	243649330	244009113
	Left-Cerebellum-Cortex	rs1863806	2	16130064	2p24.3	T	C	0.6119	T3V10	-0.0393	0.0058	9.058e-12	intergenic	MYCN(dist=42939),GACAT3(dist=60485)	1f	1.6
	Left-Cerebellum-Cortex	rs11096716	2	16366420	2p24.3	C	G	0.3168	T3V11	-0.0399	0.0062	1.009e-10	intergenic	GACAT3(dist=140609),FAM49A(dist=364310)	2b	0.515
	Left-Cerebellum-Cortex	rs55795022	2	16386265	2p24.3	A	T	0.171	T3V12	-0.0641	0.0084	1.626e-14	intergenic	GACAT3(dist=160454),FAM49A(dist=344465)	2b	16.11	T3L8	16130064	16386265
	Left-Cerebellum-Cortex	rs2542212	2	217803906	2q35	A	G	0.0348	T3V13	-0.1044	0.0162	1.284e-10	intergenic	LINC01921(dist=67544),DIRC3-AS1(dist=343550)	7	0.773	T3L9	217749247	217854158
	Left-Cerebellum-Cortex	rs2234675	2	223085955	2q36.1	T	G	0.0423	T3V14	-0.1539	0.0137	2.842e-29	exonic (missense variant)	PAX3	5	27.7	T3L10	223041206	223102579
	Left-Cerebellum-Cortex	rs2172442	4	4762383	4p16.2	C	G	0.6799	T3V15	0.0595	0.0059	1.421e-23	intergenic	STX18-AS1(dist=49719),LOC101928279(dist=1104)	4	0.005	T3L11	4744339	4834348
	Left-Cerebellum-Cortex	rs2703102	4	77923638	4q21.1	C	G	0.6075	T3V16	-0.0348	0.0057	9.848e-10	intronic	SEPTIN11	1f	0.133	T3L12	77876839	77938885
	Left-Cerebellum-Cortex	rs11727676	4	145659064	4q31.21	T	C	0.9052	T3V17	0.072	0.0094	2.441e-14	exonic (synonymous variant)	HHIP	5	12.31	T3L13	145597759	146087979
	Left-Cerebellum-Cortex	rs17413044	5	53476717	5q11.2	A	C	0.2067	T3V18	-0.0542	0.0069	2.853e-15	intronic	ARL15	4	15.77	T3L14	53400877	53522456
	Left-Cerebellum-Cortex	rs39641	5	53511060	5q11.2	A	T	0.7249	T3V19	-0.0412	0.0065	1.788e-10	intronic	ARL15	2b	14.83
	Left-Cerebellum-Cortex	rs10900828	5	133836294	5q31.1	T	G	0.4128	T3V20	0.0452	0.0058	5.947e-15	intergenic	LOC102546229(dist=65556),LINC01843(dist=5949)	5	1.554	T3L15	133828356	133865452
	Left-Cerebellum-Cortex	rs4711000	6	22099484	6p22.3	T	C	0.5503	T3V21	0.0352	0.0056	2.444e-10	ncRNA_intronic	CASC15	4	16.87	T3L16	22099484	22107290
	Left-Cerebellum-Cortex	rs522862	6	100139610	6q16.2	A	G	0.1954	T3V22	-0.054	0.007	7.842e-15	intergenic	PRDM13(dist=76156),MCHR2(dist=226787)	7	1.244	T3L17	99701622	100277937
	Left-Cerebellum-Cortex	rs75343521	6	126732511	6q22.32	T	C	0.0403	T3V23	0.0957	0.014	8.003e-12	intergenic	NONE(dist=NONE),NONE(dist=NONE)	6	2.36	T3L18	126613946	127277488
	Left-Cerebellum-Cortex	rs4304216	7	156092669	7q36.3	A	T	0.4166	T3V24	-0.058	0.0056	5.567e-25	intergenic	LOC389602(dist=331584),LOC285889(dist=137814)	6	1.832	T3L19	156066471	156371216
	Left-Cerebellum-Cortex	rs79961526	7	156153478	7q36.3	A	G	0.0578	T3V25	0.0776	0.0119	7.67e-11	intergenic	LOC389602(dist=392393),LOC285889(dist=77005)	7	1.609
	Left-Cerebellum-Cortex	rs57131976	7	156167072	7q36.3	A	C	0.4253	T3V26	0.0516	0.0056	3.004e-20	intergenic	LOC389602(dist=405987),LOC285889(dist=63411)	1f	0.676
	Left-Cerebellum-Cortex	rs2280716	7	156253492	7q36.3	T	C	0.8031	T3V27	-0.05	0.007	7.434e-13	intergenic	LOC285889(dist=15210),LINC01006(dist=11301)	4	1.641
	Left-Cerebellum-Cortex	rs62482611	7	156257004	7q36.3	A	T	0.908	T3V28	0.0624	0.0098	2.035e-10	intergenic	LOC285889(dist=18722),LINC01006(dist=7789)	5	5.239
	Left-Cerebellum-Cortex	rs7799972	7	156370803	7q36.3	A	G	0.2083	T3V29	-0.0462	0.007	5.44e-11	ncRNA_intronic	LINC01006	2b	1.836
	Left-Cerebellum-Cortex	rs1693560	8	101680292	8q22.3	A	G	0.5352	T3V30	-0.0349	0.0056	3.576e-10	intergenic	SNX31(dist=18399),PABPC1(dist=34852)	1b	3.27	T3L20	101673265	101681163
	Left-Cerebellum-Cortex	rs10110223	8	120887566	8q24.12	A	G	0.5472	T3V31	-0.0366	0.0056	4.597e-11	intronic	DEPTOR	1f	0.398	T3L21	120886545	120943507
	Left-Cerebellum-Cortex	rs35807050	8	142040409	8q24.3	A	T	0.5864	T3V32	0.0461	0.0056	2.554e-16	intergenic	PTK2(dist=28231),DENND3(dist=98279)	1f	0.707	T3L22	142033034	142042870
	Left-Cerebellum-Cortex	rs9410491	9	92124592	9q22.2	T	C	0.1839	T3V33	-0.0443	0.0072	9.192e-10	intergenic	SEMA4D(dist=11704),GADD45G(dist=95335)	1f	1.272	T3L23	92097391	92124592
	Left-Cerebellum-Cortex	rs118017926	9	109626812	9q31.2	T	C	0.9742	T3V34	0.109	0.0175	4.232e-10	intronic	ZNF462	4	21.8	T3L24	109571457	109790579
	Left-Cerebellum-Cortex	rs10759832	9	118930313	9q33.1	T	C	0.6118	T3V35	-0.0502	0.0057	9.574e-19	intronic	PAPPA	5	2.814
	Left-Cerebellum-Cortex	rs72754248	9	119061396	9q33.1	A	G	0.0706	T3V36	0.2053	0.0108	7.428e-81	intronic	PAPPA	2b	13.23	T3L25	118918479	119479868
	Left-Cerebellum-Cortex	rs72754249	9	119064017	9q33.1	T	C	0.9947	T3V37	-0.2324	0.038	9.506e-10	intronic	PAPPA	4	3.728
	Left-Cerebellum-Cortex	rs1885983	9	119078356	9q33.1	A	G	0.3421	T3V38	-0.0383	0.0058	4.915e-11	intronic	PAPPA	1d	1.091
	Left-Cerebellum-Cortex	rs1861881	9	119312256	9q33.1	T	G	0.313	T3V39	-0.0447	0.006	6.602e-14	ncRNA_intronic	ASTN2-AS1	1f	0.296
	Left-Cerebellum-Cortex	rs75049376	10	23484966	10p12.2	A	G	0.899	T3V40	0.0601	0.0092	7.134e-11	intergenic	PTF1A(dist=1792),C10orf67(dist=5879)	4	20.6	T3L26	23484966	23484966
	Left-Cerebellum-Cortex	rs7092622	10	104249919	10q24.32	T	G	0.647	T3V41	0.035	0.0058	1.486e-09	intronic	ACTR1A	1f	0.781	T3L27	104225832	104374815
	Left-Cerebellum-Cortex	rs4752582	10	123443605	10q26.13	A	G	0.9247	T3V42	-0.0789	0.0105	5.868e-14	intergenic	FGFR2(dist=85633),ATE1(dist=56331)	1f	12.79	T3L28	123441384	123444591
	Left-Cerebellum-Cortex	rs6591508	11	58943265	11q12.1	A	C	0.309	T3V43	-0.0376	0.006	3.948e-10	intronic	DTX4	1f	1.441	T3L29	58856544	58944104
	Left-Cerebellum-Cortex	rs174555	11	61579760	11q12.2	T	C	0.6897	T3V44	-0.04	0.006	1.848e-11	intronic	FADS1	1f	0.431	T3L30	61543499	61624181
	Left-Cerebellum-Cortex	rs630034	12	4092365	12p13.32	A	G	0.4743	T3V45	0.036	0.0056	1.526e-10	intergenic	PARP11(dist=109751),CCND2-AS1(dist=265568)	5	0.278	T3L31	4091762	4092365
	Left-Cerebellum-Cortex	rs4301837	12	102336310	12q23.2	T	C	0.5051	T3V46	0.0369	0.0056	3.853e-11	intergenic	DRAM1(dist=18920),WASHC3(dist=70308)	1b	4.068
	Left-Cerebellum-Cortex	rs35872193	12	102442428	12q23.2	A	T	0.7931	T3V47	-0.0776	0.0069	1.437e-29	intronic	WASHC3	6	0.138	T3L32	102324872	102989173
	Left-Cerebellum-Cortex	rs78360407	12	102751205	12q23.2	A	C	0.0448	T3V48	-0.0896	0.0133	1.827e-11	intergenic	PMCH(dist=159594),IGF1(dist=38447)	4	10.76
	Left-Cerebellum-Cortex	rs703545	12	102943000	12q23.2	A	G	0.1581	T3V49	-0.074	0.0077	3.775e-22	intergenic	IGF1(dist=68659),LINC00485(dist=260061)	5	0.186
	Left-Cerebellum-Cortex	rs111891989	12	120801099	12q24.31	C	G	0.9394	T3V50	0.0734	0.0116	2.432e-10	intronic	MSI1	1f	13.1	T3L33	120760385	120801099
	Left-Cerebellum-Cortex	rs8039459	15	82320426	15q25.2	C	G	0.3053	T3V51	-0.0369	0.006	7.937e-10	intergenic	TMC3-AS1(dist=585009),MEX3B(dist=13693)	1b	1.793	T3L34	82278144	82360813
	Left-Cerebellum-Cortex	rs2696551	17	44349234	17q21.31	T	C	0.1784	T3V52	-0.0468	0.0076	6.09e-10	intergenic	KANSL1(dist=46494),ARL17B(dist=2316)	5	4.295	T3L35	43656627	44854587
	Left-Cerebellum-Cortex	rs59384167	19	18444518	19p13.11	A	C	0.5508	T3V53	0.0341	0.0056	1.32e-09	intergenic	LSM4(dist=10632),PGPEP1(dist=6890)	2c	0.959	T3L36	18439383	18444809
	Right-Cerebellum-Cortex	rs74067851	1	40385375	1p34.2	T	C	0.8798	T4V1	0.0604	0.0084	6.289e-13	intergenic	MYCL(dist=17786),MFSD2A(dist=35409)	1f	14.11	T4L1	40303627	40385375
	Right-Cerebellum-Cortex	rs11587399	1	50861071	1p32.3	A	T	0.7858	T4V2	-0.0481	0.0066	2.927e-13	intergenic	ELAVL4(dist=191627),DMRTA2(dist=22151)	6	4.43
	Right-Cerebellum-Cortex	rs6678244	1	51418437	1p32.3	A	G	0.585	T4V3	-0.044	0.0056	4.045e-15	intronic	FAF1	1f	0.567
	Right-Cerebellum-Cortex	rs12072311	1	51572465	1p32.3	C	G	0.0532	T4V4	0.1356	0.0121	2.869e-29	intronic	C1orf185	1f	0.732	T4L2	50826176	52131542
	Right-Cerebellum-Cortex	rs2748444	1	76010959	1p31.1	T	C	0.8492	T4V5	0.0542	0.0076	9.163e-13	intronic	SLC44A5	1f	3.247	T4L3	75946751	76060541
	Right-Cerebellum-Cortex	rs240101	1	176547835	1q25.2	A	G	0.6296	T4V6	0.0436	0.0056	7.056e-15	intronic	PAPPA2	7	4.784	T4L4	176525194	176705538
	Right-Cerebellum-Cortex	rs144673025	1	223178026	1q41	T	C	0.993	T4V7	0.217	0.0326	2.672e-11	exonic (missense variant)	DISP1	5	23.3	T4L5	223148387	223178026
	Right-Cerebellum-Cortex	rs76923341	1	227441351	1q42.13	A	T	0.1631	T4V8	0.0461	0.0075	8.443e-10	intronic	CDC42BPA	5	4.228	T4L6	227217789	227509822
	Right-Cerebellum-Cortex	rs7523102	1	243672074	1q43	T	C	0.2661	T4V9	0.0424	0.0062	7.538e-12	intronic	AKT3	4	1.272	T4L7	243651806	244003446
	Right-Cerebellum-Cortex	rs1863806	2	16130064	2p24.3	T	C	0.6119	T4V10	-0.0378	0.0056	2.256e-11	intergenic	MYCN(dist=42939),GACAT3(dist=60485)	1f	1.6
	Right-Cerebellum-Cortex	rs11096716	2	16366420	2p24.3	C	G	0.3168	T4V11	-0.0381	0.006	2.903e-10	intergenic	GACAT3(dist=140609),FAM49A(dist=364310)	2b	0.515
	Right-Cerebellum-Cortex	rs55795022	2	16386265	2p24.3	A	T	0.171	T4V12	-0.0647	0.0082	2.607e-15	intergenic	GACAT3(dist=160454),FAM49A(dist=344465)	2b	16.11	T4L8	16130064	16386265
	Right-Cerebellum-Cortex	rs2542212	2	217803906	2q35	A	G	0.0348	T4V13	-0.1088	0.0159	7.916e-12	intergenic	LINC01921(dist=67544),DIRC3-AS1(dist=343550)	7	0.773	T4L9	217749247	217875518
	Right-Cerebellum-Cortex	rs2234675	2	223085955	2q36.1	T	G	0.0423	T4V14	-0.15	0.0134	5.228e-29	exonic (missense variant)	PAX3	5	27.7	T4L10	223046616	223259955
	Right-Cerebellum-Cortex	rs114895876	3	127352970	3q21.3	A	G	0.9888	T4V15	0.1575	0.0257	9.434e-10	intronic	PODXL2	1b	8.252	T4L11	127352970	127352970
	Right-Cerebellum-Cortex	rs2172442	4	4762383	4p16.2	C	G	0.6799	T4V16	0.0559	0.0058	7.708e-22	intergenic	STX18-AS1(dist=49719),LOC101928279(dist=1104)	4	0.005	T4L12	4744339	4784151
	Right-Cerebellum-Cortex	rs2703102	4	77923638	4q21.1	C	G	0.6075	T4V17	-0.0353	0.0056	2.508e-10	intronic	SEPTIN11	1f	0.133	T4L13	77876839	77938885
	Right-Cerebellum-Cortex	rs13107325	4	103188709	4q24	T	C	0.0713	T4V18	0.0645	0.0106	1.008e-09	exonic (missense variant)	SLC39A8	6	24.2	T4L14	102926923	103287131
	Right-Cerebellum-Cortex	rs11727676	4	145659064	4q31.21	T	C	0.9052	T4V19	0.068	0.0092	1.992e-13	exonic (synonymous variant)	HHIP	5	12.31	T4L15	145597759	146087979
	Right-Cerebellum-Cortex	rs17413044	5	53476717	5q11.2	A	C	0.2068	T4V20	-0.0478	0.0067	1.12e-12	intronic	ARL15	4	15.77	T4L16	53462968	53515888
	Right-Cerebellum-Cortex	rs39641	5	53511060	5q11.2	A	T	0.7249	T4V21	-0.041	0.0063	8.633e-11	intronic	ARL15	2b	14.83
	Right-Cerebellum-Cortex	rs10900828	5	133836294	5q31.1	T	G	0.4128	T4V22	0.043	0.0057	3.172e-14	intergenic	LOC102546229(dist=65556),LINC01843(dist=5949)	5	1.554	T4L17	133828356	133865452
	Right-Cerebellum-Cortex	rs4711000	6	22099484	6p22.3	T	C	0.5503	T4V23	0.0357	0.0054	6.024e-11	ncRNA_intronic	CASC15	4	16.87	T4L18	22099484	22107290
	Right-Cerebellum-Cortex	rs13191889	6	35013209	6p21.31	A	G	0.4116	T4V24	0.0337	0.0055	8.038e-10	intronic	ANKS1A	1d	6.608	T4L19	34962060	35013209
	Right-Cerebellum-Cortex	rs182613	6	99768894	6q16.2	T	C	0.6193	T4V25	-0.0355	0.0056	2.161e-10	intronic	FAXC	1f	3.803
	Right-Cerebellum-Cortex	rs522862	6	100139610	6q16.2	A	G	0.1954	T4V26	-0.0527	0.0068	9.955e-15	intergenic	PRDM13(dist=76156),MCHR2(dist=226787)	7	1.244	T4L20	99701622	100277937
	Right-Cerebellum-Cortex	rs13217795	6	108974098	6q21	T	C	0.7033	T4V27	0.0371	0.0059	3.565e-10	intronic	FOXO3	1f	10.16	T4L21	108861264	109005588
	Right-Cerebellum-Cortex	rs75343521	6	126732511	6q22.32	T	C	0.0404	T4V28	0.0911	0.0137	3.074e-11	intergenic	NONE(dist=NONE),NONE(dist=NONE)	6	2.36	T4L22	126648460	127277488
	Right-Cerebellum-Cortex	rs35061193	7	100178177	7q22.1	T	C	0.4766	T4V29	0.0338	0.0055	5.355e-10	intronic	LRCH4	2b	2.973	T4L23	100110324	100190116
	Right-Cerebellum-Cortex	rs4304216	7	156092669	7q36.3	A	T	0.4166	T4V30	-0.0566	0.0055	7.719e-25	intergenic	LOC389602(dist=331584),LOC285889(dist=137814)	6	1.832	T4L24	156066471	156370803
	Right-Cerebellum-Cortex	rs79961526	7	156153478	7q36.3	A	G	0.0578	T4V31	0.0792	0.0117	1.173e-11	intergenic	LOC389602(dist=392393),LOC285889(dist=77005)	7	1.609
	Right-Cerebellum-Cortex	rs36071136	7	156166303	7q36.3	C	G	0.5746	T4V32	-0.0479	0.0055	2.582e-18	intergenic	LOC389602(dist=405218),LOC285889(dist=64180)	4	1.05
	Right-Cerebellum-Cortex	rs2280716	7	156253492	7q36.3	T	C	0.8031	T4V33	-0.0455	0.0068	2.612e-11	intergenic	LOC285889(dist=15210),LINC01006(dist=11301)	4	1.641
	Right-Cerebellum-Cortex	rs7799972	7	156370803	7q36.3	A	G	0.2083	T4V34	-0.0431	0.0069	4.037e-10	ncRNA_intronic	LINC01006	2b	1.836
	Right-Cerebellum-Cortex	rs2929309	8	9083771	8p23.1	A	C	0.4764	T4V35	0.0332	0.0054	9.333e-10	intergenic	LOC101929128(dist=23405),LOC157273(dist=98790)	1f	0.402	T4L25	9029413	9606264
	Right-Cerebellum-Cortex	rs10110223	8	120887566	8q24.12	A	G	0.5472	T4V36	-0.0335	0.0054	7.853e-10	intronic	DEPTOR	1f	0.398	T4L26	120886545	120933963
	Right-Cerebellum-Cortex	rs35807050	8	142040409	8q24.3	A	T	0.5864	T4V37	0.0458	0.0055	1.079e-16	intergenic	PTK2(dist=28231),DENND3(dist=98279)	1f	0.707	T4L27	142033034	142042870
	Right-Cerebellum-Cortex	rs118017926	9	109626812	9q31.2	T	C	0.9742	T4V38	0.1168	0.0171	8.279e-12	intronic	ZNF462	4	21.8	T4L28	109460441	109790579
	Right-Cerebellum-Cortex	rs10759832	9	118930313	9q33.1	T	C	0.6118	T4V39	-0.0488	0.0056	1.815e-18	intronic	PAPPA	5	2.814
	Right-Cerebellum-Cortex	rs72754248	9	119061396	9q33.1	A	G	0.0706	T4V40	0.1983	0.0106	1.173e-78	intronic	PAPPA	2b	13.23	T4L29	118918479	119481253
	Right-Cerebellum-Cortex	rs72754249	9	119064017	9q33.1	T	C	0.9947	T4V41	-0.2269	0.0372	1.079e-09	intronic	PAPPA	4	3.728
	Right-Cerebellum-Cortex	rs1885983	9	119078356	9q33.1	A	G	0.3422	T4V42	-0.0365	0.0057	1.663e-10	intronic	PAPPA	1d	1.091
	Right-Cerebellum-Cortex	rs4836757	9	119326613	9q33.1	A	G	0.5381	T4V43	-0.0347	0.0055	1.945e-10	intronic	ASTN2	1b	15.47
	Right-Cerebellum-Cortex	rs4836791	9	119392292	9q33.1	T	C	0.9497	T4V44	0.089	0.0124	6.828e-13	intronic	ASTN2	1f	0.052
	Right-Cerebellum-Cortex	rs75049376	10	23484966	10p12.2	A	G	0.899	T4V45	0.0603	0.009	2.574e-11	intergenic	PTF1A(dist=1792),C10orf67(dist=5879)	4	20.6	T4L30	23453093	23484966
	Right-Cerebellum-Cortex	rs4752582	10	123443605	10q26.13	A	G	0.9247	T4V46	-0.0772	0.0103	6.112e-14	intergenic	FGFR2(dist=85633),ATE1(dist=56331)	1f	12.79	T4L31	123441384	123444591
	Right-Cerebellum-Cortex	rs7925496	11	58943928	11q12.1	A	T	0.6906	T4V47	0.0365	0.0059	5.254e-10	intronic	DTX4	1f	4.154	T4L32	58856544	58944104
	Right-Cerebellum-Cortex	rs174560	11	61581764	11q12.2	T	C	0.6847	T4V48	-0.0379	0.0058	7.694e-11	intronic	FADS1	1f	7.4	T4L33	61543499	61624181
	Right-Cerebellum-Cortex	rs630034	12	4092365	12p13.32	A	G	0.4743	T4V49	0.035	0.0055	2.255e-10	intergenic	PARP11(dist=109751),CCND2-AS1(dist=265568)	5	0.278	T4L34	4092365	4092365
	Right-Cerebellum-Cortex	rs4301837	12	102336310	12q23.2	T	C	0.505	T4V50	0.0341	0.0055	4.389e-10	intergenic	DRAM1(dist=18920),WASHC3(dist=70308)	1b	4.068
	Right-Cerebellum-Cortex	rs4611262	12	102502759	12q23.2	T	C	0.2193	T4V51	-0.0413	0.0066	4.039e-10	intronic	NUP37	6	4.006
	Right-Cerebellum-Cortex	rs1533688	12	102772745	12q23.2	T	C	0.2247	T4V52	0.0414	0.0065	1.703e-10	intergenic	PMCH(dist=181134),IGF1(dist=16907)	7	13.75
	Right-Cerebellum-Cortex	rs11111278	12	102846020	12q23.2	A	G	0.7921	T4V53	-0.0771	0.0067	1.158e-30	intronic	IGF1	7	2.401	T4L35	102324872	102989173
	Right-Cerebellum-Cortex	rs79519967	12	102850462	12q23.2	T	G	0.9911	T4V54	0.1751	0.0289	1.344e-09	intronic	IGF1	5	18.48
	Right-Cerebellum-Cortex	rs703545	12	102943000	12q23.2	A	G	0.1581	T4V55	-0.0736	0.0075	9.574e-23	intergenic	IGF1(dist=68659),LINC00485(dist=260061)	5	0.186
	Right-Cerebellum-Cortex	rs111891989	12	120801099	12q24.31	C	G	0.9394	T4V56	0.0743	0.0114	6.317e-11	intronic	MSI1	1f	13.1	T4L36	120729505	120801099
	Right-Cerebellum-Cortex	rs62073257	17	44412076	17q21.31	A	G	0.7948	T5V1	0.0433	0.0069	2.898e-10	intronic	ARL17A,ARL17B,LRRC37A	7	10.44	T4L37	43572419	44863133
	Cbm_Vermis	rs2803310	1	2017297	1p36.33	T	C	0.7009	T5V2	-0.0481	0.0065	1.657e-13	intronic	PRKCZ	1f	1.635	T5L1	1985513	2028127
	Cbm_Vermis	rs57401684	1	51571884	1p32.3	A	T	0.0742	T5V3	0.0844	0.0114	1.111e-13	intronic	C1orf185	1f	0.217	T5L2	51501896	51985042
	Cbm_Vermis	rs11163074	1	75775227	1p31.1	A	G	0.5279	T5V4	-0.0376	0.006	3.014e-10	intronic	SLC44A5	7	0.85
	Cbm_Vermis	rs187969047	1	76001971	1p31.1	A	G	0.0123	T5V5	-0.1767	0.0272	8.306e-11	intronic	SLC44A5	5	0.136
	Cbm_Vermis	rs76934732	1	76013268	1p31.1	A	G	0.1501	T5V6	-0.1669	0.0084	9.693e-89	intronic	SLC44A5	7	2.192	T5L3	75457055	76483283
	Cbm_Vermis	rs148578909	1	76015538	1p31.1	A	T	0.0135	T5V7	-0.1934	0.0259	8.605e-14	intronic	SLC44A5	1f	0.107
	Cbm_Vermis	rs548446330	1	76046462	1p31.1	A	G	0.0099	T5V8	-0.2143	0.03	9.771e-13	intronic	SLC44A5	6	0.586
	Cbm_Vermis	rs7555627	1	76082708	1p31.1	A	G	0.6831	T5V9	-0.0447	0.0064	3.416e-12	upstream	SLC44A5(dist=860)	1f	6.615
	Cbm_Vermis	rs76946932	1	76104627	1p31.1	T	C	0.0212	T5V10	-0.1528	0.0211	4.028e-13	intergenic	SLC44A5(dist=22779),ACADM(dist=85405)	1f	3.521
	Cbm_Vermis	rs12145334	1	76168496	1p31.1	A	G	0.2736	T5V11	-0.0488	0.0068	5.115e-13	intergenic	SLC44A5(dist=86648),ACADM(dist=21536)	5	0.611
	Cbm_Vermis	rs7512780	1	163807632	1q23.3	T	C	0.3086	T5V12	-0.0486	0.0065	4.743e-14	intergenic	LOC100422212(dist=414651),PBX1(dist=720965)	4	5.41	T5L4	163768768	163814167
	Cbm_Vermis	rs137867756	2	111935619	2q13	T	C	0.01	T5V13	-0.1876	0.0299	3.548e-10	intergenic	BCL2L11(dist=9597),MIR4435-2HG(dist=17825)	5	1.61	T5L5	111874697	111935619
	Cbm_Vermis	rs1257344	2	144598432	2q22.3	A	G	0.5081	T5V14	-0.0367	0.006	9.152e-10	intergenic	ARHGAP15(dist=72511),LOC101928386(dist=96202)	1f	21	T5L6	144545138	144663667
	Cbm_Vermis	rs9989738	2	179129455	2q31.2	T	C	0.571	T5V15	0.0397	0.006	4.238e-11	intronic	OSBPL6	1f	8.926	T5L7	179101921	179215153
	Cbm_Vermis	rs1263603	2	207927831	2q33.3	A	G	0.5663	T5V16	-0.0458	0.006	3.366e-14	intergenic	CPO(dist=93633),KLF7(dist=11031)	7	0.086
	Cbm_Vermis	rs2360675	2	208059640	2q33.3	A	C	0.5549	T5V17	0.0776	0.006	4.457e-38	ncRNA_intronic	MYOSLID-AS1	6	17.16	T5L8	207882369	208118374
	Cbm_Vermis	rs7643379	3	192619383	3q29	A	G	0.4598	T5V18	-0.0594	0.006	2.15e-23	intronic	MB21D2	1f	5.957	T5L9	192611314	192751104
	Cbm_Vermis	rs2289043	4	96106322	4q22.3	A	G	0.3008	T5V19	-0.0427	0.0065	4.909e-11	exonic (missense variant)	UNC5C	1f	21.3	T5L10	96103865	96118696
	Cbm_Vermis	rs13107325	4	103188709	4q24	T	C	0.0713	T5V20	0.0887	0.0116	2.2e-14	exonic (missense variant)	SLC39A8	6	24.2	T5L11	102926923	103387094
	Cbm_Vermis	rs6898297	5	112417183	5q22.2	A	G	0.6285	T5V21	0.0494	0.0062	1.209e-15	intronic	MCC	1f	2.439	T5L12	112388225	112442272
	Cbm_Vermis	rs10900828	5	133836294	5q31.1	T	G	0.4128	T5V22	0.0419	0.0062	1.735e-11	intergenic	LOC102546229(dist=65556),LINC01843(dist=5949)	5	1.554	T5L13	133828356	133865452
	Cbm_Vermis	rs7701020	5	158369272	5q33.3	A	T	0.6426	T5V23	0.0385	0.0062	4.408e-10	intronic	EBF1	4	4.779	T5L14	158357494	158380961
	Cbm_Vermis	rs4724229	7	43629746	7p13	T	C	0.3131	T5V24	-0.0396	0.0066	1.564e-09	intronic	STK17A	1f	2.896	T5L15	43625112	43830464
	Cbm_Vermis	rs35061193	7	100178177	7q22.1	T	C	0.4766	T5V25	0.0389	0.006	8.736e-11	intronic	LRCH4	2b	2.973	T5L16	100178177	100178177
	Cbm_Vermis	rs727708	7	103330944	7q22.1	T	C	0.4673	T5V26	-0.0477	0.006	1.511e-15	intronic	RELN	1f	4.894	T5L17	103204178	103579462
	Cbm_Vermis	rs12705169	7	103576888	7q22.1	T	G	0.6436	T5V27	-0.045	0.0063	7.466e-13	intronic	RELN	4	11.25
	Cbm_Vermis	rs34079891	7	114747340	7q31.2	A	T	0.1279	T5V28	-0.0551	0.0089	6.641e-10	ncRNA_intronic	LINC01393	1f	3.601	T5L18	114699198	114820706
	Cbm_Vermis	rs1731845	7	155654006	7q36.3	T	C	0.6322	T5V29	-0.0376	0.0062	1.009e-09	intergenic	SHH(dist=48849),LOC389602(dist=101320)	4	0.304
	Cbm_Vermis	rs10447502	7	156072251	7q36.3	T	C	0.2892	T5V30	-0.0529	0.0066	6.587e-16	intergenic	LOC389602(dist=311166),LOC285889(dist=158232)	5	2.878
	Cbm_Vermis	rs36071136	7	156166303	7q36.3	C	G	0.5746	T5V31	-0.0622	0.006	5.47e-25	intergenic	LOC389602(dist=405218),LOC285889(dist=64180)	4	1.05	T5L19	155634076	156693880
	Cbm_Vermis	rs4716610	7	156243562	7q36.3	T	G	0.6211	T5V32	0.038	0.0061	5.562e-10	intergenic	LOC285889(dist=5280),LINC01006(dist=21231)	5	1.139
	Cbm_Vermis	rs2280716	7	156253492	7q36.3	T	C	0.8031	T5V33	-0.0488	0.0075	8.033e-11	intergenic	LOC285889(dist=15210),LINC01006(dist=11301)	4	1.641
	Cbm_Vermis	rs2695582	7	156371216	7q36.3	T	C	0.6892	T5V34	-0.0432	0.0067	1.309e-10	ncRNA_intronic	LINC01006	4	1.136
	Cbm_Vermis	rs80171586	7	156590604	7q36.3	T	G	0.1613	T5V35	0.0495	0.0081	9.945e-10	intronic	LMBR1	7	9.013
	Cbm_Vermis	rs2597325	8	133449317	8q24.22	T	G	0.2186	T5V36	-0.0496	0.0073	9.328e-12	intronic	KCNQ3	6	1.092	T5L20	133433495	133453586
	Cbm_Vermis	rs13268108	8	142039586	8q24.3	T	C	0.6092	T5V37	0.0438	0.0062	1.558e-12	intergenic	PTK2(dist=27408),DENND3(dist=99102)	1b	1.832	T5L21	142033034	142084221
	Cbm_Vermis	rs1535840	9	2251704	9p24.2	A	G	0.6109	T5V38	0.0388	0.0061	2.448e-10	intergenic	SMARCA2(dist=58081),VLDLR-AS1(dist=283951)	7	4.549	T5L22	2240526	2278217
	Cbm_Vermis	rs7027172	9	109571457	9q31.2	A	G	0.0227	T5V39	-0.1361	0.02	1.118e-11	intergenic	LINC01505(dist=129376),ZNF462(dist=53990)	7	1.327	T5L23	109571457	109664447
	Cbm_Vermis	rs10759833	9	118930383	9q33.1	T	C	0.6153	T5V40	-0.0393	0.0061	1.414e-10	intronic	PAPPA	5	4.242
	Cbm_Vermis	rs72754248	9	119061396	9q33.1	A	G	0.0706	T5V41	0.0934	0.0116	8.7e-16	intronic	PAPPA	2b	13.23	T5L24	118918479	119481253
	Cbm_Vermis	rs10983311	9	119470373	9q33.1	A	T	0.2192	T5V42	-0.0487	0.0072	1.282e-11	intronic	ASTN2	1f	10.36
	Cbm_Vermis	rs77641763	9	140265782	9q34.3	T	C	0.123	T5V43	-0.0677	0.009	7.307e-14	intronic	EXD3	4	1.304	T5L25	140241209	140278206
	Cbm_Vermis	rs11597095	10	133752612	10q26.3	T	C	0.4892	T5V44	-0.036	0.006	1.497e-09	intronic	PPP2R2D	2a	0.988	T5L26	133751657	133799990
	Cbm_Vermis	rs11111278	12	102846020	12q23.2	A	G	0.7921	T5V45	-0.0695	0.0074	3.732e-21	intronic	IGF1	7	2.401	T5L27	102392022	102946220
	Cbm_Vermis	rs703547	12	102943707	12q23.2	C	G	0.8419	T5V46	0.0516	0.0082	3.821e-10	intergenic	IGF1(dist=69366),LINC00485(dist=259354)	4	0.477
	Cbm_Vermis	rs1716169	12	123716930	12q24.31	A	T	0.2015	T5V47	0.0524	0.0074	1.529e-12	intronic	MPHOSPH9	2b	3.109	T5L28	123447928	123913433
	Cbm_Vermis	rs10152004	14	56619187	14q22.3	A	G	0.9279	T5V48	-0.0704	0.0116	1.113e-09	intronic	PELI2	1d	6.805	T5L29	56619187	56619187
	Cbm_total	rs74067851	1	40385375	1p34.2	T	C	0.8798	T6V1	0.0559	0.0081	4.497e-12	intergenic	MYCL(dist=17786),MFSD2A(dist=35409)	1f	14.11	T6L1	40303627	40385375
	Cbm_total	rs11587399	1	50861071	1p32.3	A	T	0.7858	T6V2	-0.0458	0.0063	5.286e-13	intergenic	ELAVL4(dist=191627),DMRTA2(dist=22151)	6	4.43
	Cbm_total	rs12094601	1	51075040	1p32.3	A	T	0.4327	T6V3	0.0399	0.0052	2.723e-14	intronic	FAF1	1f	2.407
	Cbm_total	rs72908878	1	51554925	1p32.3	A	G	0.9469	T6V4	-0.1232	0.0116	2.496e-26	intergenic	MIR6500(dist=29150),C1orf185(dist=12975)	1f	12.58	T6L2	50826176	52131542
	Cbm_total	rs2748444	1	76010959	1p31.1	T	C	0.8492	T6V5	0.0611	0.0073	5.733e-17	intronic	SLC44A5	1f	3.247	T6L3	75946751	76091842
	Cbm_total	rs240101	1	176547835	1q25.2	A	G	0.6295	T6V6	0.0388	0.0054	5.584e-13	intronic	PAPPA2	7	4.784	T6L4	176525194	176683490
	Cbm_total	rs144673025	1	223178026	1q41	T	C	0.993	T6V7	0.2094	0.0313	2.361e-11	exonic (missense variant)	DISP1	5	23.3	T6L5	223148387	223178026
	Cbm_total	rs7523102	1	243672074	1q43	T	C	0.2661	T6V8	0.0432	0.006	4.229e-13	intronic	AKT3	4	1.272	T6L6	243649330	244011843
	Cbm_total	rs1863806	2	16130064	2p24.3	T	C	0.6119	T6V9	-0.0364	0.0054	2.215e-11	intergenic	MYCN(dist=42939),GACAT3(dist=60485)	1f	1.6
	Cbm_total	rs11096716	2	16366420	2p24.3	C	G	0.3168	T6V10	-0.0373	0.0058	1.424e-10	intergenic	GACAT3(dist=140609),FAM49A(dist=364310)	2b	0.515
	Cbm_total	rs55795022	2	16386265	2p24.3	A	T	0.171	T6V11	-0.0631	0.0079	1.113e-15	intergenic	GACAT3(dist=160454),FAM49A(dist=344465)	2b	16.11	T6L7	16130064	16386265
	Cbm_total	rs2542212	2	217803906	2q35	A	G	0.0348	T6V12	-0.0928	0.0153	1.337e-09	intergenic	LINC01921(dist=67544),DIRC3-AS1(dist=343550)	7	0.773	T6L8	217771135	217851440
	Cbm_total	rs2234675	2	223085955	2q36.1	T	G	0.0423	T6V13	-0.143	0.0129	1.81e-28	exonic (missense variant)	PAX3	5	27.7	T6L9	223046616	223259955
	Cbm_total	rs114895876	3	127352970	3q21.3	A	G	0.9888	T6V14	0.1506	0.0248	1.221e-09	intronic	PODXL2	1b	8.252	T6L10	127352970	127352970
	Cbm_total	rs2172442	4	4762383	4p16.2	C	G	0.6799	T6V15	0.0516	0.0056	3.269e-20	intergenic	STX18-AS1(dist=49719),LOC101928279(dist=1104)	4	0.005	T6L11	4744339	4784151
	Cbm_total	rs2703102	4	77923638	4q21.1	C	G	0.6075	T6V16	-0.0325	0.0054	1.373e-09	intronic	SEPTIN11	1f	0.133	T6L12	77876839	77938885
	Cbm_total	rs2199936	4	89045331	4q22.1	A	G	0.1145	T6V17	-0.0507	0.0081	4.746e-10	intronic	ABCG2	7	2.753	T6L13	89039082	89054667
	Cbm_total	rs11727676	4	145659064	4q31.21	T	C	0.9052	T6V18	0.0652	0.0089	2.269e-13	exonic (synonymous variant)	HHIP	5	12.31	T6L14	145597759	146087979
	Cbm_total	rs11743996	5	53498407	5q11.2	A	G	0.2083	T6V19	-0.0421	0.0064	5.355e-11	intronic	ARL15	7	8.535	T6L15	53462968	53508400
	Cbm_total	rs10900828	5	133836294	5q31.1	T	G	0.4128	T6V20	0.0355	0.0055	8.031e-11	intergenic	LOC102546229(dist=65556),LINC01843(dist=5949)	5	1.554	T6L16	133828356	133863352
	Cbm_total	rs4711000	6	22099484	6p22.3	T	C	0.5503	T6V21	0.034	0.0052	8.829e-11	ncRNA_intronic	CASC15	4	16.87	T6L17	22099484	22107290
	Cbm_total	rs522862	6	100139610	6q16.2	A	G	0.1954	T6V22	-0.0495	0.0066	4.298e-14	intergenic	PRDM13(dist=76156),MCHR2(dist=226787)	7	1.244	T6L18	99701622	100263587
	Cbm_total	rs13217795	6	108974098	6q21	T	C	0.7033	T6V23	0.0422	0.0057	1.178e-13	intronic	FOXO3	1f	10.16	T6L19	108861264	109020032
	Cbm_total	rs75343521	6	126732511	6q22.32	T	C	0.0404	T6V24	0.0881	0.0132	2.438e-11	intergenic	NONE(dist=NONE),NONE(dist=NONE)	6	2.36	T6L20	126648460	127277488
	Cbm_total	rs12536500	7	50808033	7p12.1	T	C	0.2495	T6V25	-0.0393	0.006	6.461e-11	intronic	GRB10	1f	7.681	T6L21	50742617	50876001
	Cbm_total	rs4537191	7	156083152	7q36.3	T	C	0.5823	T6V26	0.0519	0.0053	1.127e-22	intergenic	LOC389602(dist=322067),LOC285889(dist=147331)	6	1.436	T6L22	156066471	156257004
	Cbm_total	rs57131976	7	156167072	7q36.3	A	C	0.4253	T6V27	0.0474	0.0053	2.998e-19	intergenic	LOC389602(dist=405987),LOC285889(dist=63411)	1f	0.676
	Cbm_total	rs1543988	7	156205302	7q36.3	T	C	0.928	T6V28	-0.0662	0.0101	6.227e-11	intergenic	LOC389602(dist=444217),LOC285889(dist=25181)	7	2.174
	Cbm_total	rs2280716	7	156253492	7q36.3	T	C	0.8031	T6V29	-0.0462	0.0066	2.096e-12	intergenic	LOC285889(dist=15210),LINC01006(dist=11301)	4	1.641
	Cbm_total	rs62482611	7	156257004	7q36.3	A	T	0.908	T6V30	0.0568	0.0093	8.432e-10	intergenic	LOC285889(dist=18722),LINC01006(dist=7789)	5	5.239
	Cbm_total	rs10110223	8	120887566	8q24.12	A	G	0.5472	T6V31	-0.0351	0.0052	2.188e-11	intronic	DEPTOR	1f	0.398	T6L23	120861966	121046348
	Cbm_total	rs13268108	8	142039586	8q24.3	T	C	0.6092	T6V32	0.0418	0.0054	1.299e-14	intergenic	PTK2(dist=27408),DENND3(dist=99102)	1b	1.832	T6L24	142033034	142042870
	Cbm_total	rs118017926	9	109626812	9q31.2	T	C	0.9742	T6V33	0.1149	0.0165	2.871e-12	intronic	ZNF462	4	21.8	T6L25	109460441	109790579
	Cbm_total	rs10759832	9	118930313	9q33.1	T	C	0.6118	T6V34	-0.0541	0.0054	5.119e-24	intronic	PAPPA	5	2.814
	Cbm_total	rs72754248	9	119061396	9q33.1	A	G	0.0706	T6V35	0.1884	0.0102	1.046e-76	intronic	PAPPA	2b	13.23	T6L26	118918479	119479868
	Cbm_total	rs72754249	9	119064017	9q33.1	T	C	0.9947	T6V36	-0.2261	0.0358	2.746e-10	intronic	PAPPA	4	3.728
	Cbm_total	rs1885983	9	119078356	9q33.1	A	G	0.3422	T6V37	-0.036	0.0055	5.636e-11	intronic	PAPPA	1d	1.091
	Cbm_total	rs1861881	9	119312256	9q33.1	T	G	0.313	T6V38	-0.0414	0.0056	1.93e-13	ncRNA_intronic	ASTN2-AS1	1f	0.296
	Cbm_total	rs10883725	10	104235956	10q24.32	C	G	0.3544	T6V39	-0.0332	0.0055	1.181e-09	UTR3	MFSD13A(NM_024789:c.*215C>G)	1f	2.405	T6L27	104225832	104374815
	Cbm_total	rs4752582	10	123443605	10q26.13	A	G	0.9247	T6V40	-0.0747	0.0099	4.367e-14	intergenic	FGFR2(dist=85633),ATE1(dist=56331)	1f	12.79	T6L28	123441384	123444591
	Cbm_total	rs6591508	11	58943265	11q12.1	A	C	0.309	T6V41	-0.0354	0.0057	3.829e-10	intronic	DTX4	1f	1.441	T6L29	58856544	58944104
	Cbm_total	rs630034	12	4092365	12p13.32	A	G	0.4743	T6V42	0.0334	0.0053	3.119e-10	intergenic	PARP11(dist=109751),CCND2-AS1(dist=265568)	5	0.278	T6L30	4091762	4100116
	Cbm_total	rs7310976	12	4100116	12p13.32	T	C	0.3373	T6V43	0.035	0.0058	1.526e-09	intergenic	PARP11(dist=117502),CCND2-AS1(dist=257817)	4	7.105
	Cbm_total	rs4301837	12	102336310	12q23.2	T	C	0.5051	T6V44	0.05	0.0053	2.234e-21	intergenic	DRAM1(dist=18920),WASHC3(dist=70308)	1b	4.068
	Cbm_total	rs76197610	12	102338012	12q23.2	T	C	0.918	T6V45	-0.0583	0.0096	1.091e-09	intergenic	DRAM1(dist=20622),WASHC3(dist=68606)	7	3.712
	Cbm_total	rs78360407	12	102751205	12q23.2	A	C	0.0448	T6V46	-0.0892	0.0126	1.272e-12	intergenic	PMCH(dist=159594),IGF1(dist=38447)	4	10.76
	Cbm_total	rs1533688	12	102772745	12q23.2	T	C	0.2247	T6V47	0.0435	0.0062	3.073e-12	intergenic	PMCH(dist=181134),IGF1(dist=16907)	7	13.75
	Cbm_total	rs11111278	12	102846020	12q23.2	A	G	0.7921	T6V48	-0.0843	0.0064	4.144e-39	intronic	IGF1	7	2.401	T6L31	102265606	102989173
	Cbm_total	rs79519967	12	102850462	12q23.2	T	G	0.9911	T6V49	0.1773	0.0278	1.753e-10	intronic	IGF1	5	18.48
	Cbm_total	rs703545	12	102943000	12q23.2	A	G	0.1581	T6V50	-0.0709	0.0072	8.15e-23	intergenic	IGF1(dist=68659),LINC00485(dist=260061)	5	0.186
	Cbm_total	rs111891989	12	120801099	12q24.31	C	G	0.9394	T6V51	0.0687	0.0109	3.351e-10	intronic	MSI1	1f	13.1	T6L32	120760385	120801099
	Cbm_total	rs72749576	15	82507919	15q25.2	C	G	0.9302	T6V52	-0.0624	0.0102	1.024e-09	intronic	EFL1	1f	1.198	T6L33	82507605	83488802
	Cbm_total	rs62073257	17	44412076	17q21.31	A	G	0.7948	T6V53	0.0489	0.0066	1.296e-13	intronic	ARL17A,ARL17B,LRRC37A	7	10.44	T6L34	43463493	44865603
	Cbm_Left_I_IV	rs2779490	1	76014288	1p31.1	T	C	0.1509	T7V1	-0.0711	0.0085	8.084e-17	intronic	SLC44A5	1f	6.265	T7L1	75946751	76091842
	Cbm_Left_I_IV	rs2234675	2	223085955	2q36.1	T	G	0.0423	T7V2	-0.1184	0.0151	4.425e-15	exonic (missense variant)	PAX3	5	27.7	T7L2	223046616	223102579
	Cbm_Left_I_IV	rs10196267	2	237630295	2q37.3	A	G	0.5803	T7V3	-0.0469	0.0062	3.816e-14	intergenic	ACKR3(dist=139301),LOC93463(dist=326947)	1f	0.112	T7L3	237601109	237677928
	Cbm_Left_I_IV	rs13173232	5	89413053	5q14.3	T	C	0.3104	T7V4	-0.0399	0.0066	1.311e-09	intergenic	MIR3660(dist=100516),LINC01339(dist=41103)	5	1.483	T7L4	89409314	89419677
	Cbm_Left_I_IV	rs4711000	6	22099484	6p22.3	T	C	0.5504	T7V5	0.0374	0.0061	1.048e-09	ncRNA_intronic	CASC15	4	16.87	T7L5	22099484	22104421
	Cbm_Left_I_IV	rs10277279	7	84525520	7q21.11	A	G	0.2607	T7V6	0.044	0.0069	2.292e-10	intergenic	LOC101927378(dist=311886),SEMA3D(dist=99352)	1f	2.299	T7L6	83996234	84544961
	Cbm_Left_I_IV	rs4304216	7	156092669	7q36.3	A	T	0.4166	T7V7	-0.0474	0.0062	1.83e-14	intergenic	LOC389602(dist=331584),LOC285889(dist=137814)	6	1.832	T7L7	156066471	156170722
	Cbm_Left_I_IV	rs35137250	7	156161066	7q36.3	T	C	0.4673	T7V8	0.0417	0.0062	2.312e-11	intergenic	LOC389602(dist=399981),LOC285889(dist=69417)	3a	2.67
	Cbm_Left_I_IV	rs13268108	8	142039586	8q24.3	T	C	0.6092	T7V9	0.0428	0.0063	1.385e-11	intergenic	PTK2(dist=27408),DENND3(dist=99102)	1b	1.832	T7L8	142033034	142042870
	Cbm_Left_I_IV	rs72754248	9	119061396	9q33.1	A	G	0.0706	T7V10	0.0861	0.0119	4.403e-13	intronic	PAPPA	2b	13.23	T7L9	119061396	119093757
	Cbm_Left_I_IV	rs11507683	9	140262424	9q34.3	T	C	0.1227	T7V11	-0.0872	0.0093	4.225e-21	exonic (synonymous variant)	EXD3	5	2.809	T7L10	140240310	140288459
	Cbm_Left_I_IV	rs9421819	10	48482576	10q11.22	C	G	0.7942	T7V12	0.0476	0.0075	2.799e-10	intergenic	GDF10(dist=43411),PTPN20(dist=254464)	2b	0.773	T7L11	48482576	48488334
	Cbm_Left_I_IV	rs11111090	12	102326461	12q23.2	A	C	0.5205	T7V13	0.0415	0.0061	1.143e-11	intergenic	DRAM1(dist=9071),WASHC3(dist=80157)	1f	3.741
	Cbm_Left_I_IV	rs144782470	12	102524505	12q23.2	T	C	0.0392	T7V14	-0.1001	0.0157	1.892e-10	intronic	PARPBP	5	0.601
	Cbm_Left_I_IV	rs1533688	12	102772745	12q23.2	T	C	0.2247	T7V15	0.0441	0.0073	1.456e-09	intergenic	PMCH(dist=181134),IGF1(dist=16907)	7	13.75
	Cbm_Left_I_IV	rs11111278	12	102846020	12q23.2	A	G	0.7921	T7V16	-0.0711	0.0075	3.966e-21	intronic	IGF1	7	2.401	T7L12	102322903	102946220
	Cbm_Left_I_IV	rs9587187	13	107380937	13q33.3	A	C	0.8931	T7V17	0.0792	0.0099	1.269e-15	intergenic	LINC00443(dist=56409),FAM155A(dist=434922)	6	0.806	T7L13	107330562	107386390
	Cbm_Left_I_IV	rs36132266	14	69266023	14q24.1	T	G	0.4339	T7V18	-0.0488	0.0061	1.915e-15	intergenic	ZFP36L1(dist=3063),ACTN1(dist=74817)	7	5.987	T7L14	69213851	69306338
	Cbm_Left_I_IV	rs9909009	17	19906503	17p11.2	A	G	0.5041	T7V19	0.0385	0.0061	3.457e-10	intergenic	AKAP10(dist=25334),SPECC1(dist=6169)	1d	1.54	T7L15	19799698	20344672
	Cbm_Left_I_IV	rs78777685	17	35257232	17q12	A	G	0.2179	T7V20	0.0561	0.0076	1.296e-13	ncRNA_intronic	LHX1-DT	4	16.19	T7L16	35245000	35261073
	Cbm_Left_I_IV	rs9905515	17	35261073	17q12	C	G	0.223	T7V21	-0.054	0.0074	2.093e-13	ncRNA_intronic	LHX1-DT	5	0.542
	Cbm_Left_I_IV	rs1529904	18	73077398	18q22.3	C	G	0.2197	T7V22	0.0461	0.0073	2.876e-10	intergenic	TSHZ1(dist=75493),SMIM21(dist=44033)	5	0.216	T7L17	73060397	73079104
	Cbm_Left_I_IV	rs66500423	19	41195170	19q13.2	T	C	0.6878	T7V23	0.0434	0.0066	5.148e-11	intronic	NUMBL	1f	14.34	T7L18	41195170	41195170
	Cbm_Left_I_IV	rs34380139	X	19544526	Xp22.12	A	T	0.8476	T7V24	-0.0489	0.007	3.499e-12	intergenic	MAP3K15(dist=11147),SH3KBP1(dist=7557)	4	1.455	T7L19	19509554	19779995
	Cbm_Right_I_IV	rs61653323	1	76024919	1p31.1	T	C	0.1509	T8V1	-0.0701	0.0086	2.505e-16	intronic	SLC44A5	1b	1.703	T8L1	75946751	76091842
	Cbm_Right_I_IV	rs35758221	2	60792671	2p16.1	A	C	0.3616	T8V2	-0.0411	0.0066	3.836e-10	intergenic	BCL11A(dist=11882),PAPOLG(dist=190732)	1f	19.52	T8L2	60777498	60900351
	Cbm_Right_I_IV	rs2234675	2	223085955	2q36.1	T	G	0.0423	T8V3	-0.1154	0.0151	2.467e-14	exonic (missense variant)	PAX3	5	27.7	T8L3	223046616	223102579
	Cbm_Right_I_IV	rs360702	3	138703773	3q23	A	G	0.775	T8V4	0.0446	0.0073	1.195e-09	intergenic	FOXL2NB(dist=30941),PRR23A(dist=19031)	1f	0.535	T8L4	138695899	138791152
	Cbm_Right_I_IV	rs13135092	4	103198082	4q24	A	G	0.9214	T8V5	-0.0692	0.0114	1.243e-09	intronic	SLC39A8	6	10.31	T8L5	103146888	103385407
	Cbm_Right_I_IV	rs4711000	6	22099484	6p22.3	T	C	0.5504	T8V6	0.041	0.0061	2.38e-11	ncRNA_intronic	CASC15	4	16.87	T8L6	22072425	22107290
	Cbm_Right_I_IV	rs7778054	7	156095814	7q36.3	T	C	0.4744	T8V7	0.0425	0.0061	4.51e-12	intergenic	LOC389602(dist=334729),LOC285889(dist=134669)	6	2.282	T8L7	156066471	156187072
	Cbm_Right_I_IV	rs57131976	7	156167072	7q36.3	A	C	0.4252	T8V8	0.041	0.0062	3.613e-11	intergenic	LOC389602(dist=405987),LOC285889(dist=63411)	1f	0.676
	Cbm_Right_I_IV	rs28458909	9	140257189	9q34.3	T	C	0.1231	T8V9	-0.0751	0.0093	5.354e-16	intronic	EXD3	4	7.113	T8L8	140241209	140288459
	Cbm_Right_I_IV	rs10829556	10	130842249	10q26.3	A	G	0.7404	T8V10	0.0499	0.0072	2.915e-12	intergenic	LINC02667(dist=127715),MGMT(dist=423256)	4	19.94	T8L9	130840798	130842249
	Cbm_Right_I_IV	rs4301837	12	102336310	12q23.2	T	C	0.505	T8V11	0.0424	0.0062	6.133e-12	intergenic	DRAM1(dist=18920),WASHC3(dist=70308)	1b	4.068
	Cbm_Right_I_IV	rs7971939	12	102407432	12q23.2	A	T	0.7802	T8V12	-0.0691	0.0074	8.262e-21	intronic	WASHC3	1f	0.705	T8L10	102322903	102946220
	Cbm_Right_I_IV	rs78360407	12	102751205	12q23.2	A	C	0.0448	T8V13	-0.0999	0.0147	1.147e-11	intergenic	PMCH(dist=159594),IGF1(dist=38447)	4	10.76
	Cbm_Right_I_IV	rs9301159	13	107377936	13q33.3	A	C	0.8876	T8V14	0.0879	0.0097	1.071e-19	intergenic	LINC00443(dist=53408),FAM155A(dist=437923)	7	0.618	T8L11	107330562	107386390
	Cbm_Right_I_IV	rs36132266	14	69266023	14q24.1	T	G	0.4339	T8V15	-0.0463	0.0062	5.244e-14	intergenic	ZFP36L1(dist=3063),ACTN1(dist=74817)	7	5.987	T8L12	69192825	69298878
	Cbm_Right_I_IV	rs78777685	17	35257232	17q12	A	G	0.2179	T8V16	0.0562	0.0076	1.265e-13	ncRNA_intronic	LHX1-DT	4	16.19	T8L13	35254917	35257237
	Cbm_Right_I_IV	rs66500423	19	41195170	19q13.2	T	C	0.6878	T8V17	0.0514	0.0066	8.167e-15	intronic	NUMBL	1f	14.34	T8L14	41195170	41302706
	Cbm_Right_I_IV	rs58542439	X	19544854	Xp22.12	T	C	0.153	T8V18	0.0467	0.007	3.243e-11	intergenic	MAP3K15(dist=11475),SH3KBP1(dist=7229)	1f	1.73	T8L15	19509554	20294788
	Cbm_Left_V	rs6676515	1	50861987	1p32.3	A	G	0.4934	T9V1	-0.0394	0.0062	2.238e-10	intergenic	ELAVL4(dist=192543),DMRTA2(dist=21235)	7	2.24
	Cbm_Left_V	rs12091097	1	51659401	1p32.3	A	C	0.9425	T9V2	-0.1016	0.0133	2.565e-14	intergenic	C1orf185(dist=45644),LINC01562(dist=1366)	1f	6.071	T9L1	50826624	52018941
	Cbm_Left_V	rs2748444	1	76010959	1p31.1	T	C	0.8492	T9V3	0.0684	0.0087	4.892e-15	intronic	SLC44A5	1f	3.247	T9L2	75946751	76070085
	Cbm_Left_V	rs6691412	1	165283995	1q23.3	A	G	0.8021	T9V4	0.0537	0.008	1.882e-11	intronic	LMX1A	5	1.409	T9L3	165127380	165343101
	Cbm_Left_V	rs2234675	2	223085955	2q36.1	T	G	0.0423	T9V5	-0.1092	0.0154	1.56e-12	exonic (missense variant)	PAX3	5	27.7	T9L4	223046616	223102579
	Cbm_Left_V	rs7556982	2	237644199	2q37.3	A	G	0.5793	T9V6	-0.0446	0.0063	1.486e-12	intergenic	ACKR3(dist=153205),LOC93463(dist=313043)	5	4.769	T9L5	237600633	237644199
	Cbm_Left_V	rs9826158	3	89257419	3p11.1	T	C	0.7152	T9V7	0.0497	0.007	9.187e-13	intronic	EPHA3	1f	1.798	T9L6	89042915	89315046
	Cbm_Left_V	rs13173232	5	89413053	5q14.3	T	C	0.3104	T9V8	-0.0551	0.0067	2.661e-16	intergenic	MIR3660(dist=100516),LINC01339(dist=41103)	5	1.483	T9L7	89409314	89422501
	Cbm_Left_V	rs3094908	7	84150868	7q21.11	T	C	0.218	T9V9	0.0457	0.0076	1.591e-09	intergenic	SEMA3A(dist=326763),LOC101927378(dist=10924)	7	3.089	T9L8	83996352	84542156
	Cbm_Left_V	rs7350040	7	156170722	7q36.3	A	C	0.5793	T9V10	-0.0484	0.0064	3.394e-14	intergenic	LOC389602(dist=409637),LOC285889(dist=59761)	5	1.043	T9L9	156156610	156187072
	Cbm_Left_V	rs35990411	8	8417561	8p23.1	C	G	0.5149	T9V11	-0.0382	0.0063	1.032e-09	intergenic	PRAG1(dist=173612),CLDN23(dist=141886)	1f	0.561	T9L10	8392274	8430472
	Cbm_Left_V	rs6984592	8	142040038	8q24.3	A	G	0.5806	T9V12	0.0396	0.0063	3.765e-10	intergenic	PTK2(dist=27860),DENND3(dist=98650)	1f	2.813	T9L11	142033034	142042870
	Cbm_Left_V	rs28458909	9	140257189	9q34.3	T	C	0.1231	T9V13	-0.082	0.0095	4.13e-18	intronic	EXD3	4	7.113	T9L12	140240310	140288459
	Cbm_Left_V	rs9421819	10	48482576	10q11.22	C	G	0.7942	T9V14	0.0891	0.0077	6.61e-31	intergenic	GDF10(dist=43411),PTPN20(dist=254464)	2b	0.773	T9L13	48452870	48701235
	Cbm_Left_V	rs72792209	10	48642348	10q11.22	A	G	0.0877	T9V15	-0.1095	0.011	2.855e-23	intergenic	GDF10(dist=203183),PTPN20(dist=94692)	7	0.812
	Cbm_Left_V	rs786819	10	48648356	10q11.22	A	C	0.8843	T9V16	0.0653	0.0097	2.088e-11	intergenic	GDF10(dist=209191),PTPN20(dist=88684)	1f	15.45
	Cbm_Left_V	rs187441419	12	102532378	12q23.2	C	G	0.0072	T9V17	-0.2367	0.0369	1.356e-10	intronic	PARPBP	6	0.046
	Cbm_Left_V	rs17882461	12	102863979	12q23.2	A	T	0.7776	T9V18	-0.0628	0.0075	6.558e-17	intronic	IGF1	1f	17.54	T9L14	102394872	102942969
	Cbm_Left_V	rs36132266	14	69266023	14q24.1	T	G	0.4339	T9V19	-0.0588	0.0063	8.087e-21	intergenic	ZFP36L1(dist=3063),ACTN1(dist=74817)	7	5.987	T9L15	69192825	69316200
	Cbm_Left_V	rs75034181	17	9119878	17p13.1	A	G	0.9944	T9V20	0.3804	0.042	1.412e-19	intronic	NTN1	5	0.008	T9L16	9109289	9181831
	Cbm_Left_V	rs117971919	17	9144411	17p13.1	A	G	0.0477	T9V21	-0.1204	0.0147	2.969e-16	UTR3	NTN1(NM_004822:c.*1126A>G)	2b	2.235
	Cbm_Left_V	rs7216062	17	35248914	17q12	T	C	0.0258	T9V22	-0.1271	0.0196	9.524e-11	ncRNA_intronic	LHX1-DT	4	1.853
	Cbm_Left_V	rs78777685	17	35257232	17q12	A	G	0.2179	T9V23	0.0853	0.0077	3.309e-28	ncRNA_intronic	LHX1-DT	4	16.19
	Cbm_Left_V	rs8064679	17	35259093	17q12	T	G	0.2218	T9V24	-0.099	0.0075	1.074e-39	ncRNA_intronic	LHX1-DT	2b	14.16	T9L17	35222995	35266724
	Cbm_Left_V	rs2561558	19	41164384	19q13.2	A	T	0.3731	T9V25	0.046	0.0065	1.55e-12	intergenic	LTBP4(dist=28659),NUMBL(dist=7428)	1f	7.375	T9L18	41148797	41326426
	Cbm_Right_V	rs115574950	1	51654504	1p32.3	A	C	0.0521	T10V1	0.0904	0.0138	5.188e-11	intergenic	C1orf185(dist=40747),LINC01562(dist=6263)	1b	0.223	T10L1	51510942	52004174
	Cbm_Right_V	rs2779490	1	76014288	1p31.1	T	C	0.1509	T10V2	-0.0691	0.0086	9.061e-16	intronic	SLC44A5	1f	6.265	T10L2	75946751	76091190
	Cbm_Right_V	rs13374068	1	165317255	1q23.3	T	C	0.8196	T10V3	0.0496	0.0081	7.627e-10	intronic	LMX1A	7	1.946	T10L3	165283995	165343101
	Cbm_Right_V	rs4951347	1	204245347	1q32.1	T	C	0.6227	T10V4	-0.0386	0.0064	1.217e-09	intronic	PLEKHA6	1f	4.011	T10L4	204190508	204254980
	Cbm_Right_V	rs2234675	2	223085955	2q36.1	T	G	0.0423	T10V5	-0.1055	0.0152	3.948e-12	exonic (missense variant)	PAX3	5	27.7	T10L5	223046616	223104980
	Cbm_Right_V	rs2217466	2	223104287	2q36.1	C	G	0.3852	T10V6	-0.0434	0.0063	6.979e-12	intronic	PAX3	5	0.818
	Cbm_Right_V	rs11692233	2	239478248	2q37.3	T	C	0.158	T10V7	0.0535	0.0086	5.343e-10	intergenic	LINC01107(dist=14108),LOC100287387(dist=274939)	1f	2.309	T10L6	239478248	239478248
	Cbm_Right_V	rs4699304	4	98064535	4q22.3	T	C	0.6636	T10V8	0.0407	0.0065	3.922e-10	intergenic	LINC02267(dist=324969),STPG2-AS1(dist=223542)	1f	1.534	T10L7	98054536	98273255
	Cbm_Right_V	rs2920507	5	89419677	5q14.3	A	C	0.3102	T10V9	-0.0437	0.0066	4.424e-11	intergenic	MIR3660(dist=107140),LINC01339(dist=34479)	5	22	T10L8	89409314	89422501
	Cbm_Right_V	rs201168005	6	98584713	6q16.1	A	T	0.4886	T10V10	-0.0467	0.0062	3.678e-14	intergenic	MIR2113(dist=112218),PNKY(dist=693304)	5	3.03	T10L9	98547979	98751680
	Cbm_Right_V	rs9493178	6	132441061	6q23.2	A	T	0.8585	T10V11	0.0566	0.0089	1.944e-10	intergenic	MIR548AJ1(dist=4658),LINC01013(dist=14057)	5	5.178	T10L10	132437814	132513955
	Cbm_Right_V	rs156973	7	132199628	7q32.3	T	C	0.6671	T10V12	0.0429	0.0065	4.249e-11	intronic	PLXNA4	5	1.118	T10L11	132185123	132225597
	Cbm_Right_V	rs4304216	7	156092669	7q36.3	A	T	0.4166	T10V13	-0.0422	0.0062	1.31e-11	intergenic	LOC389602(dist=331584),LOC285889(dist=137814)	6	1.832	T10L12	156067051	156371216
	Cbm_Right_V	rs10254949	7	156180672	7q36.3	T	C	0.1741	T10V14	0.0515	0.0081	1.94e-10	intergenic	LOC389602(dist=419587),LOC285889(dist=49811)	4	1.159
	Cbm_Right_V	rs2695582	7	156371216	7q36.3	T	C	0.6892	T10V15	-0.0425	0.0069	8.001e-10	ncRNA_intronic	LINC01006	4	1.136
	Cbm_Right_V	rs12679204	8	8414146	8p23.1	T	G	0.5629	T10V16	-0.0408	0.0062	4.665e-11	intergenic	PRAG1(dist=170197),CLDN23(dist=145301)	2b	1.18	T10L13	8383537	8430472
	Cbm_Right_V	rs1868276	8	142033034	8q24.3	T	C	0.3942	T10V17	-0.0464	0.0063	2.37e-13	intergenic	PTK2(dist=20856),DENND3(dist=105654)	1c	0.87	T10L14	142032804	142042870
	Cbm_Right_V	rs28780988	9	140258412	9q34.3	A	C	0.1228	T10V18	-0.059	0.0093	2.31e-10	intronic	EXD3	2b	2.239	T10L15	140243968	140278206
	Cbm_Right_V	rs9421745	10	48485194	10q11.22	A	G	0.1933	T10V19	-0.1001	0.0078	6.746e-38	intergenic	GDF10(dist=46029),PTPN20(dist=251846)	2a	17.83	T10L16	48452870	49333397
	Cbm_Right_V	rs116941231	10	48519437	10q11.22	A	G	0.9832	T10V20	0.1749	0.024	2.997e-13	intergenic	GDF10(dist=80272),PTPN20(dist=217603)	5	2.67
	Cbm_Right_V	rs1610026	10	48635138	10q11.22	C	G	0.0872	T10V21	-0.1077	0.0109	4.09e-23	intergenic	GDF10(dist=195973),PTPN20(dist=101902)	1f	1.985
	Cbm_Right_V	rs786819	10	48648356	10q11.22	A	C	0.8843	T10V22	0.0626	0.0096	6.756e-11	intergenic	GDF10(dist=209191),PTPN20(dist=88684)	1f	15.45
	Cbm_Right_V	rs693960	11	58941450	11q12.1	A	C	0.492	T10V23	-0.0378	0.0062	8.341e-10	intronic	DTX4	1b	3.92	T10L17	58930330	58944104
	Cbm_Right_V	rs4301837	12	102336310	12q23.2	T	C	0.505	T10V24	0.041	0.0062	3.5e-11	intergenic	DRAM1(dist=18920),WASHC3(dist=70308)	1b	4.068
	Cbm_Right_V	rs187441419	12	102532378	12q23.2	C	G	0.0072	T10V25	-0.2446	0.0363	1.547e-11	intronic	PARPBP	6	0.046
	Cbm_Right_V	rs17882461	12	102863979	12q23.2	A	T	0.7776	T10V26	-0.0609	0.0074	1.791e-16	intronic	IGF1	1f	17.54	T10L18	102324872	102924964
	Cbm_Right_V	rs4907484	13	113744370	13q34	T	C	0.0424	T10V27	0.094	0.0152	6.406e-10	UTR3	MCF2L(NM_001320817:c.*174T>C)	2b	14.59	T10L19	113744370	113744370
	Cbm_Right_V	rs117332043	14	57617154	14q22.3	T	C	0.0681	T10V28	-0.0875	0.0122	7.301e-13	intergenic	OTX2-AS1(dist=219128),EXOC5(dist=50071)	5	0.282	T10L20	57597715	57623935
	Cbm_Right_V	rs36132266	14	69266023	14q24.1	T	G	0.4339	T10V29	-0.0412	0.0062	2.694e-11	intergenic	ZFP36L1(dist=3063),ACTN1(dist=74817)	7	5.987	T10L21	69247305	69316200
	Cbm_Right_V	rs75034181	17	9119878	17p13.1	A	G	0.9944	T10V30	0.3802	0.0414	3.757e-20	intronic	NTN1	5	0.008	T10L22	9109289	9193618
	Cbm_Right_V	rs117971919	17	9144411	17p13.1	A	G	0.0477	T10V31	-0.1117	0.0145	1.31e-14	UTR3	NTN1(NM_004822:c.*1126A>G)	2b	2.235
	Cbm_Right_V	rs78777685	17	35257232	17q12	A	G	0.2179	T10V32	0.0513	0.0076	1.617e-11	ncRNA_intronic	LHX1-DT	4	16.19
	Cbm_Right_V	rs8064679	17	35259093	17q12	T	G	0.2218	T10V33	-0.0596	0.0074	7.082e-16	ncRNA_intronic	LHX1-DT	2b	14.16	T10L23	35243641	35262831
	Cbm_Right_V	rs66500423	19	41195170	19q13.2	T	C	0.6878	T10V34	0.0457	0.0067	6.758e-12	intronic	NUMBL	1f	14.34	T10L24	41150922	41323482
	Cbm_Left_VI	rs309503	1	23231457	1p36.12	T	G	0.4449	T11V1	0.0483	0.0067	4.486e-13	intronic	EPHB2	1f	2.079	T11L1	23210770	23247395
	Cbm_Left_VI	rs17106409	1	51576197	1p32.3	T	C	0.9248	T11V2	-0.0865	0.0124	3.231e-12	intronic	C1orf185	1f	0.38	T11L2	51535380	51776342
	Cbm_Left_VI	rs17192655	1	53699129	1p32.3	C	G	0.1342	T11V3	0.0596	0.0096	4.92e-10	intronic	MAGOH	7	4.306
	Cbm_Left_VI	rs1288492	1	53771564	1p32.3	T	C	0.4649	T11V4	-0.0414	0.0066	2.659e-10	intronic	LRP8	1b	4.589	T11L3	53699129	53774534
	Cbm_Left_VI	rs1447497	2	205402370	2q33.3	T	C	0.7564	T11V5	0.0474	0.0076	5.393e-10	intergenic	ICOS(dist=576072),PARD3B(dist=7828)	7	3.136
	Cbm_Left_VI	rs73982712	2	206024697	2q33.3	T	C	0.0087	T11V6	0.213	0.0352	1.395e-09	intronic	PARD3B	5	2.73
	Cbm_Left_VI	rs849227	2	206262570	2q33.3	A	G	0.1442	T11V7	0.063	0.01	2.791e-10	intronic	PARD3B	5	0.101
	Cbm_Left_VI	rs6724376	2	206399128	2q33.3	A	G	0.3915	T11V8	-0.0459	0.0067	8.526e-12	intronic	PARD3B	5	0.717	T11L4	205400909	206434616
	Cbm_Left_VI	rs9832454	3	50217558	3p21.31	T	C	0.0899	T11V9	-0.0728	0.0115	2.588e-10	intronic	SEMA3F	1f	1.787	T11L5	50187326	50316002
	Cbm_Left_VI	rs1489100	3	76132564	3p12.3	T	C	0.5578	T11V10	-0.0399	0.0066	1.456e-09	intergenic	ZNF717(dist=297864),ROBO2(dist=956686)	7	5.113	T11L6	76114539	76154084
	Cbm_Left_VI	rs1318947	4	4761862	4p16.2	A	G	0.6798	T11V11	0.0784	0.0071	1.067e-28	intergenic	STX18-AS1(dist=49198),LOC101928279(dist=1625)	4	6.71	T11L7	4744339	4852658
	Cbm_Left_VI	rs4859449	4	77457071	4q21.1	C	G	0.3624	T11V12	-0.0459	0.0068	1.327e-11	intronic	SHROOM3	1b	3.4	T11L8	77455540	77466032
	Cbm_Left_VI	rs1946567	4	91067333	4q22.1	T	C	0.8445	T11V13	-0.0603	0.009	2.373e-11	intronic	CCSER1	1f	2.074	T11L9	90938460	91102704
	Cbm_Left_VI	rs11936470	4	125380922	4q28.1	A	G	0.4858	T11V14	0.0484	0.0066	2.1e-13	intergenic	LINC01091(dist=528989),LINC02516(dist=40175)	2b	3.394	T11L10	125369695	125452372
	Cbm_Left_VI	rs11727676	4	145659064	4q31.21	T	C	0.9052	T11V15	0.0744	0.0112	2.873e-11	exonic (synonymous variant)	HHIP	5	12.31	T11L11	145621328	146087979
	Cbm_Left_VI	rs13172077	5	53469059	5q11.2	A	G	0.7638	T11V16	0.0545	0.0078	2.443e-12	intronic	ARL15	2b	3.757	T11L12	53400877	53515888
	Cbm_Left_VI	rs11949307	5	88191190	5q14.3	T	G	0.2298	T11V17	0.0617	0.0078	2.758e-15	ncRNA_intronic	MEF2C-AS1	1f	4.438	T11L13	88152117	88208146
	Cbm_Left_VI	rs7726679	5	112482649	5q22.2	A	G	0.6056	T11V18	-0.0435	0.0068	1.336e-10	intronic	MCC	1f	6.227	T11L14	112398526	112487287
	Cbm_Left_VI	rs4707591	6	90768329	6q15	T	C	0.2864	T11V19	0.051	0.0073	2.011e-12	intronic	BACH2	7	0.634	T11L15	90740452	90803872
	Cbm_Left_VI	rs2294405	6	99292136	6q16.1	A	G	0.3297	T11V20	-0.0518	0.007	1.066e-13	intergenic	POU3F2(dist=4802),FBXL4(dist=24275)	1f	19.22	T11L16	99234271	99297389
	Cbm_Left_VI	rs9398810	6	126815604	6q22.32	A	C	0.4548	T11V21	0.0419	0.0065	1.523e-10	intergenic	MIR588(dist=9745),RSPO3(dist=624212)	7	0.415	T11L17	126659043	127096527
	Cbm_Left_VI	rs9376271	6	137618394	6q23.3	C	G	0.5679	T11V22	-0.0423	0.0067	2.187e-10	intergenic	IFNGR1(dist=77827),OLIG3(dist=194942)	5	6.006	T11L18	137617340	137676458
	Cbm_Left_VI	rs7769624	6	148535313	6q24.3	A	C	0.4281	T11V23	0.0745	0.0066	3.177e-29	intergenic	SAMD5(dist=644156),SASH1(dist=58151)	1f	0.679	T11L19	148511790	148591116
	Cbm_Left_VI	rs6904955	6	157383274	6q25.3	A	C	0.6731	T11V24	0.0597	0.007	1.969e-17	intronic	ARID1B	2a	0.167	T11L20	157197515	157402041
	Cbm_Left_VI	rs2960266	7	101949128	7q22.1	T	C	0.3682	T11V25	0.0438	0.0068	9.846e-11	intronic	SH2B2	1f	0.763	T11L21	101810359	101955251
	Cbm_Left_VI	rs652522	7	103393086	7q22.1	A	G	0.371	T11V26	0.0464	0.0068	1.029e-11	intronic	RELN	1f	0.455
	Cbm_Left_VI	rs141473	7	103407726	7q22.1	T	C	0.354	T11V27	0.0838	0.0069	4.687e-34	intronic	RELN	6	0.337	T11L22	103204178	103870219
	Cbm_Left_VI	rs3915119	7	103530887	7q22.1	A	C	0.4562	T11V28	0.0486	0.0066	1.434e-13	intronic	RELN	1f	6.292
	Cbm_Left_VI	rs17157475	7	103580446	7q22.1	T	C	0.8668	T11V29	-0.0776	0.0096	7.123e-16	intronic	RELN	6	0.167
	Cbm_Left_VI	rs194847	7	103773168	7q22.1	T	G	0.4588	T11V30	-0.046	0.0066	2.326e-12	intronic	ORC5	7	5.269
	Cbm_Left_VI	rs2082533	7	132185123	7q32.3	A	T	0.5125	T11V31	-0.0534	0.0069	1.269e-14	intronic	PLXNA4	4	1.503	T11L23	132185123	132226505
	Cbm_Left_VI	rs10156241	8	68863901	8q13.2	A	C	0.4049	T11V32	0.0433	0.0066	7.038e-11	upstream	PREX2(dist=380)	1a	15.1	T11L24	68798806	68909116
	Cbm_Left_VI	rs6985531	8	77695388	8q21.11	T	C	0.8531	T11V33	0.0696	0.0093	5.572e-14	intronic	ZFHX4	7	13.39	T11L25	77575664	77695732
	Cbm_Left_VI	rs10810187	9	14619168	9p22.3	A	G	0.2952	T11V34	0.0573	0.0072	1.658e-15	intronic	ZDHHC21	1f	18.17	T11L26	14577674	14694602
	Cbm_Left_VI	rs118017926	9	109626812	9q31.2	T	C	0.9743	T11V35	0.1283	0.0207	5.435e-10	intronic	ZNF462	4	21.8	T11L27	109571457	109790579
	Cbm_Left_VI	rs35565319	9	119065043	9q33.1	T	C	0.0706	T11V36	0.087	0.0128	9.671e-12	exonic (synonymous variant)	PAPPA	5	18.29	T11L28	119057741	119093757
	Cbm_Left_VI	rs9421819	10	48482576	10q11.22	C	G	0.7942	T11V37	0.0517	0.0081	1.706e-10	intergenic	GDF10(dist=43411),PTPN20(dist=254464)	2b	0.773
	Cbm_Left_VI	rs9422354	10	48640536	10q11.22	T	C	0.0876	T11V38	-0.0717	0.0116	5.96e-10	intergenic	GDF10(dist=201371),PTPN20(dist=96504)	1f	0.327
	Cbm_Left_VI	rs786819	10	48648356	10q11.22	A	C	0.8843	T11V39	0.0837	0.0102	3.013e-16	intergenic	GDF10(dist=209191),PTPN20(dist=88684)	1f	15.45	T11L29	48482576	48690282
	Cbm_Left_VI	rs4752582	10	123443605	10q26.13	A	G	0.9247	T11V40	-0.0779	0.0124	3.78e-10	intergenic	FGFR2(dist=85633),ATE1(dist=56331)	1f	12.79	T11L30	123441729	123462765
	Cbm_Left_VI	rs7107785	11	95747337	11q21	T	C	0.4939	T11V41	0.05	0.0066	2.273e-14	intronic	MAML2	1f	2.603	T11L31	95728793	95749189
	Cbm_Left_VI	rs1123680	12	78241285	12q21.2	A	G	0.7627	T11V42	0.0592	0.0078	2.816e-14	intronic	NAV3	1f	0.205	T11L32	78241285	78310900
	Cbm_Left_VI	rs79519967	12	102850462	12q23.2	T	G	0.9911	T11V43	0.2141	0.0349	8.65e-10	intronic	IGF1	5	18.48	T11L33	102850462	102900770
	Cbm_Left_VI	rs2241208	12	109962795	12q24.11	C	G	0.5132	T11V44	0.0563	0.0065	8.464e-18	intronic	UBE3B	1f	1.939	T11L34	109808573	110054765
	Cbm_Left_VI	rs10483677	14	57322440	14q22.3	A	G	0.764	T11V45	0.0476	0.0077	7.067e-10	ncRNA_intronic	OTX2-AS1	4	19.93
	Cbm_Left_VI	rs117332043	14	57617154	14q22.3	T	C	0.0681	T11V46	-0.1954	0.013	6.248e-51	intergenic	OTX2-AS1(dist=219128),EXOC5(dist=50071)	5	0.282	T11L35	57297204	57831950
	Cbm_Left_VI	rs79191875	14	57684250	14q22.3	T	C	0.8592	T11V47	0.0789	0.0093	3.138e-17	intronic	EXOC5	7	9.503
	Cbm_Left_VI	rs534727641	14	57811350	14q22.3	A	G	0.0076	T11V48	-0.2279	0.0377	1.551e-09	intergenic	AP5M1(dist=45890),NAA30(dist=45954)	5	0.154
	Cbm_Left_VI	rs61618811	15	67868973	15q23	A	G	0.0877	T11V49	-0.0958	0.0116	1.868e-16	intronic	MAP2K5	1a	13.35	T11L36	67502838	68128117
	Cbm_Left_VI	rs1725643	17	20387214	17p11.2	T	C	0.6689	T11V50	-0.0457	0.007	8.787e-11	intergenic	LGALS9B(dist=16366),KRT16P3(dist=17612)	6	8.105	T11L37	19850975	20406656
	Cbm_Left_VI	rs1105654	18	47147746	18q21.1	A	G	0.6582	T11V51	0.0466	0.007	2.194e-11	intergenic	LIPG(dist=22192),ACAA2(dist=160788)	1f	0.632	T11L38	47141127	47148577
	Cbm_Left_VI	rs11663934	18	73020715	18q22.3	T	C	0.6693	T11V52	0.0468	0.007	2.147e-11	intergenic	TSHZ1(dist=18810),SMIM21(dist=100716)	4	3.625	T11L39	72996738	73050743
	Cbm_Left_VI	rs12624651	20	14841737	20p12.1	A	G	0.5772	T11V53	-0.0457	0.0066	5.25e-12	intronic	MACROD2	4	5.007	T11L40	14697386	14900614
	Cbm_Left_VI	rs79966207	22	50722408	22q13.33	T	C	0.8227	T11V54	-0.0578	0.0086	1.469e-11	exonic (missense variant)	PLXNB2	1f	24.2	T11L41	50722408	50722408
	Cbm_Right_VI	rs309505	1	23231220	1p36.12	T	C	0.445	T12V1	0.0414	0.0067	5.255e-10	intronic	EPHB2	1f	1.813	T12L1	23224019	23236192
	Cbm_Right_VI	rs57401684	1	51571884	1p32.3	A	T	0.0742	T12V2	0.094	0.0125	4.811e-14	intronic	C1orf185	1f	0.217	T12L2	50861071	51779208
	Cbm_Right_VI	rs2782492	1	53807582	1p32.3	C	G	0.357	T12V3	-0.0447	0.0068	5.7e-11	intergenic	LINC01771(dist=5401),SLC25A3P1(dist=96461)	1f	0.514	T12L3	53782500	53812211
	Cbm_Right_VI	rs2221246	1	165297637	1q23.3	T	C	0.2204	T12V4	-0.0487	0.0079	6.018e-10	intronic	LMX1A	4	1.404	T12L4	165206614	165313682
	Cbm_Right_VI	rs1017154	2	36683708	2p22.2	A	G	0.3689	T12V5	0.0435	0.0069	3.547e-10	intronic	CRIM1	4	0.636	T12L5	36652816	36683997
	Cbm_Right_VI	rs66550497	2	205119737	2q33.3	T	C	0.7326	T12V6	-0.0498	0.0074	1.568e-11	intergenic	ICOS(dist=293439),PARD3B(dist=290461)	5	3.743
	Cbm_Right_VI	rs56242731	2	206021360	2q33.3	A	G	0.0089	T12V7	0.2366	0.0349	1.146e-11	intronic	PARD3B	5	2.35	T12L6	205118871	206045092
	Cbm_Right_VI	rs9832454	3	50217558	3p21.31	T	C	0.0899	T12V8	-0.074	0.0115	1.185e-10	intronic	SEMA3F	1f	1.787	T12L7	50187326	50228316
	Cbm_Right_VI	rs1318947	4	4761862	4p16.2	A	G	0.6797	T12V9	0.067	0.007	1.617e-21	intergenic	STX18-AS1(dist=49198),LOC101928279(dist=1625)	4	6.71	T12L8	4753207	4847328
	Cbm_Right_VI	rs11936470	4	125380922	4q28.1	A	G	0.4858	T12V10	0.0411	0.0066	4.114e-10	intergenic	LINC01091(dist=528989),LINC02516(dist=40175)	2b	3.394	T12L9	125380922	125452372
	Cbm_Right_VI	rs7340949	4	145590933	4q31.21	A	G	0.512	T12V11	-0.04	0.0066	1.037e-09	intronic	HHIP	6	6.907
	Cbm_Right_VI	rs11727676	4	145659064	4q31.21	T	C	0.9052	T12V12	0.0843	0.0112	4.017e-14	exonic (synonymous variant)	HHIP	5	12.31	T12L10	145523071	146087979
	Cbm_Right_VI	rs11949307	5	88191190	5q14.3	T	G	0.2298	T12V13	0.0615	0.0078	2.896e-15	ncRNA_intronic	MEF2C-AS1	1f	4.438	T12L11	88110363	88208146
	Cbm_Right_VI	rs13173232	5	89413053	5q14.3	T	C	0.3104	T12V14	-0.0528	0.0071	7.45e-14	intergenic	MIR3660(dist=100516),LINC01339(dist=41103)	5	1.483	T12L12	89409314	89422501
	Cbm_Right_VI	rs10477486	5	112399934	5q22.2	C	G	0.6397	T12V15	-0.0493	0.0068	6.012e-13	intronic	MCC	1f	5.176	T12L13	112398526	112487287
	Cbm_Right_VI	rs4707591	6	90768329	6q15	T	C	0.2863	T12V16	0.0465	0.0072	1.289e-10	intronic	BACH2	7	0.634	T12L14	90740452	90803173
	Cbm_Right_VI	rs2294405	6	99292136	6q16.1	A	G	0.3298	T12V17	-0.0513	0.007	1.621e-13	intergenic	POU3F2(dist=4802),FBXL4(dist=24275)	1f	19.22	T12L15	99280657	99297389
	Cbm_Right_VI	rs9493180	6	132453246	6q23.2	T	C	0.6547	T12V18	0.0452	0.0069	4.079e-11	intergenic	MIR548AJ1(dist=16843),LINC01013(dist=1872)	4	6.323	T12L16	132437476	132466084
	Cbm_Right_VI	rs9376271	6	137618394	6q23.3	C	G	0.5679	T12V19	-0.0423	0.0066	1.887e-10	intergenic	IFNGR1(dist=77827),OLIG3(dist=194942)	5	6.006	T12L17	137617340	137678829
	Cbm_Right_VI	rs7769624	6	148535313	6q24.3	A	C	0.4281	T12V20	0.0693	0.0066	1.287e-25	intergenic	SAMD5(dist=644156),SASH1(dist=58151)	1f	0.679	T12L18	148511790	148591116
	Cbm_Right_VI	rs6904955	6	157383274	6q25.3	A	C	0.6731	T12V21	0.0585	0.007	6.898e-17	intronic	ARID1B	2a	0.167	T12L19	157218902	157385621
	Cbm_Right_VI	rs17860755	6	170716709	6q27	A	T	0.1178	T12V22	0.0651	0.0101	1.379e-10	downstream	FAM120B(dist=550)	1d	5.026	T12L20	170694660	170728908
	Cbm_Right_VI	rs73187868	7	101904262	7q22.1	A	G	0.3171	T12V23	0.0453	0.0071	2.019e-10	intronic	CUX1	1b	0.012	T12L21	101856141	101955251
	Cbm_Right_VI	rs652522	7	103393086	7q22.1	A	G	0.3709	T12V24	0.0538	0.0068	2.684e-15	intronic	RELN	1f	0.455
	Cbm_Right_VI	rs141473	7	103407726	7q22.1	T	C	0.354	T12V25	0.0868	0.0069	1.401e-36	intronic	RELN	6	0.337	T12L22	103204178	103870219
	Cbm_Right_VI	rs1510846	7	103421702	7q22.1	T	C	0.7396	T12V26	-0.0459	0.0075	1.01e-09	intronic	RELN	4	2.952
	Cbm_Right_VI	rs147037411	7	103493306	7q22.1	T	C	0.9684	T12V27	-0.114	0.0188	1.424e-09	intronic	RELN	7	4.216
	Cbm_Right_VI	rs2299397	7	103529336	7q22.1	A	G	0.5439	T12V28	-0.043	0.0065	5.055e-11	intronic	RELN	1f	4.665
	Cbm_Right_VI	rs17157475	7	103580446	7q22.1	T	C	0.8668	T12V29	-0.0838	0.0096	2.394e-18	intronic	RELN	6	0.167
	Cbm_Right_VI	rs6973058	7	103850321	7q22.2	T	C	0.5332	T12V30	0.0421	0.0065	1.158e-10	intergenic	ORC5(dist=1826),LHFPL3(dist=118783)	1f	3.907
	Cbm_Right_VI	rs2082533	7	132185123	7q32.3	A	T	0.5125	T12V31	-0.0547	0.0069	2.398e-15	intronic	PLXNA4	4	1.503	T12L23	132185123	132226505
	Cbm_Right_VI	rs10156241	8	68863901	8q13.2	A	C	0.4049	T12V32	0.0534	0.0066	7.557e-16	upstream	PREX2(dist=380)	1a	15.1	T12L24	68785688	68909116
	Cbm_Right_VI	rs7007731	8	77695732	8q21.11	T	C	0.1449	T12V33	-0.073	0.0093	5.444e-15	intronic	ZFHX4	6	3.157	T12L25	77588548	77695732
	Cbm_Right_VI	rs10810187	9	14619168	9p22.3	A	G	0.2952	T12V34	0.0491	0.0072	7.971e-12	intronic	ZDHHC21	1f	18.17	T12L26	14579620	14687867
	Cbm_Right_VI	rs35565319	9	119065043	9q33.1	T	C	0.0706	T12V35	0.1214	0.0127	1.595e-21	exonic (synonymous variant)	PAPPA	5	18.29	T12L27	119057741	119093757
	Cbm_Right_VI	rs9422354	10	48640536	10q11.22	T	C	0.0876	T12V36	-0.076	0.0116	4.838e-11	intergenic	GDF10(dist=201371),PTPN20(dist=96504)	1f	0.327
	Cbm_Right_VI	rs786819	10	48648356	10q11.22	A	C	0.8843	T12V37	0.0789	0.0102	1.071e-14	intergenic	GDF10(dist=209191),PTPN20(dist=88684)	1f	15.45	T12L28	48635138	48701235
	Cbm_Right_VI	rs10765782	11	95745187	11q21	T	G	0.505	T12V38	-0.0475	0.0065	3.785e-13	intronic	MAML2	1f	5.381	T12L29	95728793	95749189
	Cbm_Right_VI	rs1123680	12	78241285	12q21.2	A	G	0.7627	T12V39	0.0614	0.0078	2.51e-15	intronic	NAV3	1f	0.205	T12L30	78197063	78260860
	Cbm_Right_VI	rs2241208	12	109962795	12q24.11	C	G	0.5132	T12V40	0.0583	0.0065	4.739e-19	intronic	UBE3B	1f	1.939	T12L31	109804222	110054765
	Cbm_Right_VI	rs117332043	14	57617154	14q22.3	T	C	0.0681	T12V41	-0.1497	0.013	1.031e-30	intergenic	OTX2-AS1(dist=219128),EXOC5(dist=50071)	5	0.282	T12L32	57482739	57831950
	Cbm_Right_VI	rs2349702	14	59843472	14q23.1	T	C	0.5157	T12V42	0.0538	0.0071	3.86e-14	intergenic	DAAM1(dist=5349),GPR135(dist=84005)	1f	2.287	T12L33	59811665	60034073
	Cbm_Right_VI	rs2583590	15	67836253	15q23	A	C	0.0868	T12V43	-0.0926	0.0116	1.638e-15	intronic	MAP2K5	1b	1.363	T12L34	67502838	67920511
	Cbm_Right_VI	rs17379472	16	57693498	16q21	T	C	0.9633	T12V44	0.1221	0.0174	2.245e-12	exonic (missense variant)	ADGRG1	1f	25.7	T12L35	57693498	57694904
	Cbm_Right_VI	rs35226	16	65007916	16q21	T	C	0.3603	T12V45	0.0453	0.0068	2.728e-11	intronic	CDH11	1f	3.037	T12L36	64935280	65134457
	Cbm_Right_VI	rs1105654	18	47147746	18q21.1	A	G	0.6582	T12V46	0.0466	0.007	1.999e-11	intergenic	LIPG(dist=22192),ACAA2(dist=160788)	1f	0.632	T12L37	47141127	47148577
	Cbm_Right_VI	rs55881196	18	73018340	18q22.3	C	G	0.6634	T12V47	0.0464	0.0069	2.301e-11	intergenic	TSHZ1(dist=16435),SMIM21(dist=103091)	5	0.428	T12L38	73006280	73050743
	Cbm_Right_VI	rs7253633	19	38622162	19q13.13	A	G	0.426	T12V48	0.0425	0.0066	1.523e-10	intronic	SIPA1L3	1f	6.108	T12L39	38566358	38687076
	Cbm_Right_VI	rs6074807	20	14837465	20p12.1	A	G	0.4219	T12V49	0.0535	0.0066	6.039e-16	intronic	MACROD2	5	4.106	T12L40	14696882	14900614
	Cbm_Left_CrusI	rs41287294	1	51768410	1p32.3	A	C	0.0513	T13V1	0.1358	0.0145	1.012e-20	intronic	TTC39A	1f	3.981	T13L1	50882506	52114391
	Cbm_Left_CrusI	rs305464	1	88185216	1p22.3	A	G	0.2024	T13V2	0.0508	0.0081	4.585e-10	intergenic	LINC01364(dist=347878),PKN2-AS1(dist=817980)	5	1.009	T13L2	88160766	88202804
	Cbm_Left_CrusI	rs6428600	1	91192297	1p22.2	C	G	0.5476	T13V3	0.0399	0.0065	8.627e-10	intergenic	BARHL2(dist=9438),LINC02609(dist=56244)	2b	14.35	T13L3	91130054	91231232
	Cbm_Left_CrusI	rs17749164	1	231897207	1q42.2	T	C	0.5981	T13V4	-0.088	0.0066	6.358e-41	ncRNA_intronic	TSNAX-DISC1	5	1.784	T13L4	231883443	231908347
	Cbm_Left_CrusI	rs2793101	1	231904278	1q42.2	T	C	0.1081	T13V5	-0.068	0.0104	5.875e-11	ncRNA_intronic	TSNAX-DISC1	5	2.399
	Cbm_Left_CrusI	rs17643402	2	59520832	2p16.1	T	C	0.8742	T13V6	-0.0666	0.0098	8.359e-12	intergenic	LINC01793(dist=14297),MIR4432HG(dist=1065519)	6	3.892	T13L5	59276716	59740851
	Cbm_Left_CrusI	rs12328348	2	60785937	2p16.1	A	G	0.5314	T13V7	-0.0441	0.0065	8.724e-12	intergenic	BCL11A(dist=5148),PAPOLG(dist=197466)	1f	5.7	T13L6	60777498	60792671
	Cbm_Left_CrusI	rs12713596	2	67550323	2p14	A	T	0.6722	T13V8	-0.0434	0.0069	3.615e-10	intergenic	LINC01828(dist=33947),ETAA1(dist=74142)	1b	6.839	T13L7	67509403	67665951
	Cbm_Left_CrusI	rs12464825	2	165394580	2q24.3	T	G	0.4272	T13V9	-0.0545	0.0065	4.956e-17	intronic	GRB14	1f	6.754	T13L8	165340308	165437592
	Cbm_Left_CrusI	rs56071403	2	200041467	2q33.1	T	C	0.4196	T13V10	0.0468	0.0068	4.376e-12	intergenic	LINC01923(dist=801646),SATB2(dist=92756)	6	3.49	T13L9	199908378	200131695
	Cbm_Left_CrusI	rs6714490	2	207907469	2q33.3	A	G	0.7376	T13V11	-0.0581	0.0073	1.661e-15	intergenic	CPO(dist=73271),KLF7(dist=31393)	4	12.43	T13L10	207843967	208088987
	Cbm_Left_CrusI	rs741475	2	208087139	2q33.3	T	C	0.5756	T13V12	-0.044	0.0065	1.481e-11	ncRNA_intronic	MYOSLID-AS1	1f	7.84
	Cbm_Left_CrusI	rs7578471	2	217750506	2q35	A	G	0.4507	T13V13	0.0552	0.0065	1.405e-17	intergenic	LINC01921(dist=14144),DIRC3-AS1(dist=396950)	1c	5.579	T13L11	217748637	217848067
	Cbm_Left_CrusI	rs2234675	2	223085955	2q36.1	T	G	0.0423	T13V14	-0.1411	0.0159	8.094e-19	exonic (missense variant)	PAX3	5	27.7	T13L12	223046616	223102579
	Cbm_Left_CrusI	rs2600787	2	237615524	2q37.3	A	G	0.6261	T13V15	-0.0455	0.0068	2.843e-11	intergenic	ACKR3(dist=124530),LOC93463(dist=341718)	4	3.553	T13L13	237614330	237644199
	Cbm_Left_CrusI	rs6768381	3	89358071	3p11.1	T	C	0.5393	T13V16	-0.0495	0.0065	1.74e-14	intronic	EPHA3	6	1.769	T13L14	89273019	89442305
	Cbm_Left_CrusI	rs59652930	3	134986768	3q22.2	A	G	0.1463	T13V17	-0.0676	0.0091	9.187e-14	intergenic	EPHB1(dist=7461),PPP2R3A(dist=697802)	5	7.536	T13L15	134966964	135047462
	Cbm_Left_CrusI	rs2172442	4	4762383	4p16.2	C	G	0.6799	T13V18	0.057	0.0069	1.645e-16	intergenic	STX18-AS1(dist=49719),LOC101928279(dist=1104)	4	0.005	T13L16	4753207	4782575
	Cbm_Left_CrusI	rs781662	4	57780693	4q12	A	G	0.4254	T13V19	-0.0425	0.0065	6.032e-11	intronic	REST	1a	3.631	T13L17	57747798	57825593
	Cbm_Left_CrusI	rs1605761	4	121120419	4q27	T	C	0.1038	T13V20	0.0755	0.0106	9.535e-13	intergenic	MAD2L1(dist=132416),PRDM5(dist=492649)	6	0.271	T13L18	121058165	121383614
	Cbm_Left_CrusI	rs17560514	5	88189025	5q14.3	A	G	0.2299	T13V21	-0.0551	0.0077	6.067e-13	ncRNA_intronic	MEF2C-AS1	7	0.72	T13L19	88167641	88208146
	Cbm_Left_CrusI	rs2920507	5	89419677	5q14.3	A	C	0.3102	T13V22	0.0661	0.007	1.967e-21	intergenic	MIR3660(dist=107140),LINC01339(dist=34479)	5	22	T13L20	89254428	89480176
	Cbm_Left_CrusI	rs1981627	5	133838180	5q31.1	A	G	0.4143	T13V23	0.045	0.0066	1.135e-11	intergenic	LOC102546229(dist=67442),LINC01843(dist=4063)	4	7.595	T13L21	133828356	133865452
	Cbm_Left_CrusI	rs4960417	6	8438681	6p24.3	T	C	0.5716	T13V24	-0.0444	0.0065	9.679e-12	ncRNA_intronic	LOC100506207	1f	0.004
	Cbm_Left_CrusI	rs72831708	6	8730954	6p24.3	T	G	0.0626	T13V25	0.1483	0.0133	5.722e-29	ncRNA_intronic	LOC100506207	1f	1.107	T13L22	8359791	8852605
	Cbm_Left_CrusI	rs62404806	6	22419656	6p22.3	T	C	0.7934	T13V26	0.0482	0.0079	1.176e-09	intergenic	PRL(dist=116592),HDGFL1(dist=150139)	1f	5.309
	Cbm_Left_CrusI	rs6922448	6	22513914	6p22.3	A	G	0.5755	T13V27	-0.0627	0.0065	5.39e-22	intergenic	PRL(dist=210850),HDGFL1(dist=55881)	4	5.336	T13L23	22392505	22713952
	Cbm_Left_CrusI	rs13195654	6	22601416	6p22.3	C	G	0.6566	T13V28	-0.0434	0.0068	1.824e-10	intergenic	HDGFL1(dist=29522),LOC105374972(dist=42323)	5	0.405
	Cbm_Left_CrusI	rs79925073	6	98050838	6q16.1	A	C	0.0138	T13V29	0.1693	0.0277	9.121e-10	ncRNA_intronic	LOC101927314	5	1.43	T13L24	98036741	98139320
	Cbm_Left_CrusI	rs9375711	6	99297389	6q16.1	A	T	0.3287	T13V30	-0.0424	0.007	1.098e-09	intergenic	POU3F2(dist=10055),FBXL4(dist=19022)	7	4.795
	Cbm_Left_CrusI	rs522862	6	100139610	6q16.2	A	G	0.1954	T13V31	-0.0497	0.0081	7.79e-10	intergenic	PRDM13(dist=76156),MCHR2(dist=226787)	7	1.244	T13L25	99284532	100139801
	Cbm_Left_CrusI	rs9456885	6	164242262	6q26	T	G	0.5648	T13V32	-0.0401	0.0065	6.964e-10	intergenic	LOC102724152(dist=149746),MEAT6(dist=964604)	2b	16.44	T13L26	164239275	164261320
	Cbm_Left_CrusI	rs3779381	7	120966790	7q31.31	A	G	0.7375	T13V33	-0.0498	0.0073	1.106e-11	intronic	WNT16	7	3.316	T13L27	120927706	121033121
	Cbm_Left_CrusI	rs78455662	7	132197784	7q32.3	T	C	0.0742	T13V34	-0.1019	0.0123	1.059e-16	intronic	PLXNA4	5	0.843
	Cbm_Left_CrusI	rs156977	7	132202277	7q32.3	C	G	0.668	T13V35	-0.0775	0.0068	6.713e-30	intronic	PLXNA4	5	2.828	T13L28	132185123	132367387
	Cbm_Left_CrusI	rs10954384	7	132264224	7q32.3	A	G	0.5147	T13V36	-0.0461	0.0065	1.423e-12	intronic	PLXNA4	4	9.687
	Cbm_Left_CrusI	rs3757846	7	155249032	7q36.3	T	C	0.1565	T13V37	-0.0543	0.009	1.283e-09	intergenic	LOC100286906(dist=54555),EN2(dist=1792)	1f	7.569
	Cbm_Left_CrusI	rs4537191	7	156083152	7q36.3	T	C	0.5823	T13V38	0.0417	0.0065	1.628e-10	intergenic	LOC389602(dist=322067),LOC285889(dist=147331)	6	1.436	T13L29	155242188	156096029
	Cbm_Left_CrusI	rs7832234	8	26469638	8p21.2	A	C	0.8083	T13V39	0.0513	0.0082	4.031e-10	intronic	DPYSL2	1f	10.9	T13L30	26438614	26494296
	Cbm_Left_CrusI	rs58357751	8	77595642	8q21.11	A	C	0.0609	T13V40	0.1261	0.0135	1.024e-20	intronic	ZFHX4	2b	11.14	T13L31	77523302	78735203
	Cbm_Left_CrusI	rs7826554	8	78651309	8q21.12	A	C	0.3457	T13V41	0.0428	0.0068	2.865e-10	intergenic	LOC102724874(dist=262742),PKIA(dist=777266)	7	4.337
	Cbm_Left_CrusI	rs10759832	9	118930313	9q33.1	T	C	0.6118	T13V42	-0.0587	0.0066	6.556e-19	intronic	PAPPA	5	2.814
	Cbm_Left_CrusI	rs72754248	9	119061396	9q33.1	A	G	0.0706	T13V43	0.2173	0.0125	2.286e-67	intronic	PAPPA	2b	13.23	T13L32	118918479	119125449
	Cbm_Left_CrusI	rs3747825	9	119078611	9q33.1	A	G	0.6501	T13V44	0.0421	0.0067	4.143e-10	intronic	PAPPA	1b	0.456
	Cbm_Left_CrusI	rs10817872	9	119125449	9q33.1	A	T	0.6156	T13V45	-0.0442	0.0067	3.221e-11	intronic	PAPPA	5	5.542
	Cbm_Left_CrusI	rs306549	9	135470176	9q34.13	C	G	0.2342	T13V46	-0.0485	0.0076	1.64e-10	UTR3	DDX31(NM_001322343:c.*77G>C,NM_022779:c.*77G>C,NM_001322342:c.*77G>C,NM_001322340:c.*77G>C,NM_001322341:c.*77G>C)	1f	0.933	T13L33	135467359	135544016
	Cbm_Left_CrusI	rs72828403	10	122871128	10q26.12	A	G	0.9317	T13V47	0.1243	0.0127	1.023e-22	intergenic	WDR11(dist=202092),FGFR2(dist=366716)	5	9.274	T13L34	122841052	123040327
	Cbm_Left_CrusI	rs10750497	11	131975079	11q25	C	G	0.2869	T13V48	0.0538	0.0071	3.901e-14	intronic	NTM	1f	1.241	T13L35	131874317	131994544
	Cbm_Left_CrusI	rs703546	12	102943208	12q23.2	A	G	0.8621	T13V49	0.0591	0.0094	2.948e-10	intergenic	IGF1(dist=68867),LINC00485(dist=259853)	6	2.32	T13L36	102928506	102946109
	Cbm_Left_CrusI	rs34423035	12	130319808	12q24.33	C	G	0.8764	T13V50	-0.0681	0.0098	4.656e-12	intronic	TMEM132D	7	0.4	T13L37	130319560	130348048
	Cbm_Left_CrusI	rs539496	13	27137385	13q12.13	T	C	0.1924	T13V51	0.0494	0.0082	1.493e-09	intronic	WASF3	1f	1.144	T13L38	27127498	27146921
	Cbm_Left_CrusI	rs696908	13	103618857	13q33.1	C	G	0.3735	T13V52	0.0655	0.0067	6.741e-23	intergenic	METTL21EP(dist=70474),SLC10A2(dist=77491)	5	0.481
	Cbm_Left_CrusI	rs67359979	13	103668545	13q33.1	A	G	0.11	T13V53	-0.0641	0.0103	5.33e-10	intergenic	METTL21EP(dist=120162),SLC10A2(dist=27803)	4	2.577
	Cbm_Left_CrusI	rs1569270	13	103924502	13q33.1	A	G	0.1881	T13V54	-0.0957	0.0082	2.38e-31	intergenic	SLC10A2(dist=205735),LINC01309(dist=153048)	7	1.169	T13L39	103592244	104755303
	Cbm_Left_CrusI	rs1398586	13	104750688	13q33.1	A	C	0.1344	T13V55	-0.0809	0.0094	1.125e-17	intergenic	LINC01309(dist=670653),DAOA-AS1(dist=1360718)	5	2.529
	Cbm_Left_CrusI	rs76350445	14	57623935	14q22.3	T	C	0.0679	T13V56	-0.1558	0.0128	4.374e-34	intergenic	OTX2-AS1(dist=225909),EXOC5(dist=43290)	7	0.562	T13L40	57482739	57831950
	Cbm_Left_CrusI	rs10137379	14	57674867	14q22.3	T	C	0.859	T13V57	0.0677	0.0092	1.504e-13	UTR3	EXOC5(NM_006544:c.*460A>G)	6	12.88
	Cbm_Left_CrusI	rs62650186	14	69140240	14q24.1	T	C	0.4992	T13V58	-0.0433	0.0065	3.033e-11	intronic	RAD51B	4	1.037
	Cbm_Left_CrusI	rs75120172	14	69189196	14q24.1	T	C	0.9611	T13V59	-0.1073	0.0165	8.085e-11	intergenic	RAD51B(dist=39373),ZFP36L1(dist=65176)	1f	9.303
	Cbm_Left_CrusI	rs80111818	14	69228562	14q24.1	T	C	0.126	T13V60	-0.0656	0.0097	1.312e-11	intergenic	RAD51B(dist=78739),ZFP36L1(dist=25810)	4	0.081
	Cbm_Left_CrusI	rs927292	14	69258841	14q24.1	C	G	0.3227	T13V61	-0.0509	0.0069	1.065e-13	intronic	ZFP36L1	2b	10.46
	Cbm_Left_CrusI	rs1547050	14	69274950	14q24.1	T	C	0.3124	T13V62	0.106	0.0069	1.514e-52	intergenic	ZFP36L1(dist=11990),ACTN1(dist=65890)	5	0.033	T13L41	69138011	69316200
	Cbm_Left_CrusI	rs10129303	14	86315004	14q31.3	A	T	0.3808	T13V63	0.0583	0.0068	1.778e-17	intergenic	FLRT2(dist=194232),LINC02328(dist=86018)	6	2.98	T13L42	86275733	86341618
	Cbm_Left_CrusI	rs8035136	15	47977010	15q21.1	A	G	0.6596	T13V64	0.0434	0.0069	2.972e-10	intronic	SEMA6D	6	6.97	T13L43	47915304	47977010
	Cbm_Left_CrusI	rs8028912	15	67876277	15q23	A	G	0.9143	T13V65	-0.1638	0.0115	4.25e-46	intronic	MAP2K5	1f	0.136	T13L44	67502838	68271882
	Cbm_Left_CrusI	rs2356265	16	49450047	16q12.1	A	G	0.7656	T13V66	0.0684	0.0077	4.113e-19	intergenic	C16orf78(dist=16705),ZNF423(dist=71389)	1f	5.531	T13L45	49391164	49491235
	Cbm_Left_CrusI	rs45579131	18	22931508	18q11.2	A	G	0.3376	T13V67	-0.0411	0.0068	1.29e-09	intronic	ZNF521	4	7.179	T13L46	22931508	22935146
	Cbm_Left_CrusI	rs3816125	18	44601611	18q21.1	A	G	0.5468	T13V68	-0.048	0.0065	1.083e-13	intronic	KATNAL2	1f	1.031
	Cbm_Left_CrusI	rs78229985	18	44820823	18q21.1	T	C	0.9933	T13V69	0.3335	0.0395	3.259e-17	ncRNA_intronic	MIR4527HG	5	0.859	T13L47	44342225	45093560
	Cbm_Left_CrusI	rs4891263	18	73017428	18q22.3	C	G	0.6633	T13V70	0.086	0.0068	2.411e-36	intergenic	TSHZ1(dist=15523),SMIM21(dist=104003)	4	0.176	T13L48	72984937	73071083
	Cbm_Left_CrusI	rs557987931	19	50094428	19q13.33	C	G	0.9538	T13V71	0.0979	0.0153	1.497e-10	upstream;downstream	PRR12(dist=11);PRRG2(dist=167)	2b	21.5	T13L49	50065935	50136861
	Cbm_Left_CrusI	rs8127603	21	33886658	21q22.11	T	C	0.7261	T13V72	-0.0444	0.0072	7.097e-10	intronic	EVA1C	1f	2.793	T13L50	33882345	33893738
	Cbm_Left_CrusI	rs5934887	X	10335595	Xp22.2	A	T	0.3421	T13V73	0.0353	0.0056	3.75e-10	intergenic	CLCN4(dist=129896),MID1(dist=77755)	1f	16.03	T13L51	10255462	10337420
	Cbm_Left_CrusI	rs12013955	X	68056802	Xq13.1	T	C	0.1606	T13V74	-0.0448	0.0072	5.444e-10	intronic	EFNB1	5	3.749	T13L52	68053507	68066220
	Cbm_Right_CrusI	rs41287294	1	51768410	1p32.3	A	C	0.0513	T14V1	0.1435	0.0143	8.161e-24	intronic	TTC39A	1f	3.981	T14L1	50882506	52131542
	Cbm_Right_CrusI	rs305464	1	88185216	1p22.3	A	G	0.2024	T14V2	0.0515	0.008	1.158e-10	intergenic	LINC01364(dist=347878),PKN2-AS1(dist=817980)	5	1.009	T14L2	88160766	88202804
	Cbm_Right_CrusI	rs4593803	1	91231232	1p22.2	A	G	0.6193	T14V3	-0.043	0.0065	4.283e-11	intergenic	BARHL2(dist=48373),LINC02609(dist=17309)	5	2.392	T14L3	91123663	91232054
	Cbm_Right_CrusI	rs10798461	1	176543287	1q25.2	A	T	0.371	T14V4	-0.0395	0.0065	1.455e-09	intronic	PAPPA2	1f	0.58	T14L4	176525194	176623778
	Cbm_Right_CrusI	rs17749164	1	231897207	1q42.2	T	C	0.5981	T14V5	-0.0852	0.0064	5.748e-40	ncRNA_intronic	TSNAX-DISC1	5	1.784	T14L5	231883443	231908347
	Cbm_Right_CrusI	rs72758645	1	231904002	1q42.2	A	G	0.8964	T14V6	0.0624	0.0103	1.459e-09	ncRNA_intronic	TSNAX-DISC1	4	2.425
	Cbm_Right_CrusI	rs2793101	1	231904278	1q42.2	T	C	0.1081	T14V7	-0.0671	0.0102	4.459e-11	ncRNA_intronic	TSNAX-DISC1	5	2.399
	Cbm_Right_CrusI	rs17642655	2	59500867	2p16.1	A	G	0.124	T14V8	0.0594	0.0096	6.818e-10	ncRNA_intronic	LINC01793	7	0.406	T14L6	59467937	59641105
	Cbm_Right_CrusI	rs12713596	2	67550323	2p14	A	T	0.6722	T14V9	-0.0436	0.0068	1.357e-10	intergenic	LINC01828(dist=33947),ETAA1(dist=74142)	1b	6.839	T14L7	67509403	67622438
	Cbm_Right_CrusI	rs72971966	2	121605370	2q14.2	A	G	0.1403	T14V10	-0.0559	0.0091	9.594e-10	intronic	GLI2	1f	8.302	T14L8	121594826	121606041
	Cbm_Right_CrusI	rs12464825	2	165394580	2q24.3	T	G	0.4272	T14V11	-0.0452	0.0064	1.406e-12	intronic	GRB14	1f	6.754	T14L9	165356343	165437592
	Cbm_Right_CrusI	rs17195804	2	200123367	2q33.1	A	G	0.5498	T14V12	-0.0406	0.0063	1.11e-10	intergenic	LINC01923(dist=883546),SATB2(dist=10856)	1f	1.58	T14L10	199908378	200228543
	Cbm_Right_CrusI	rs6714490	2	207907469	2q33.3	A	G	0.7376	T14V13	-0.0641	0.0072	3.341e-19	intergenic	CPO(dist=73271),KLF7(dist=31393)	4	12.43	T14L11	207843967	208089904
	Cbm_Right_CrusI	rs741475	2	208087139	2q33.3	T	C	0.5756	T14V14	-0.0405	0.0064	2.255e-10	ncRNA_intronic	MYOSLID-AS1	1f	7.84
	Cbm_Right_CrusI	rs7578471	2	217750506	2q35	A	G	0.4507	T14V15	0.0623	0.0063	8.32e-23	intergenic	LINC01921(dist=14144),DIRC3-AS1(dist=396950)	1c	5.579	T14L12	217748637	217941790
	Cbm_Right_CrusI	rs2234675	2	223085955	2q36.1	T	G	0.0423	T14V16	-0.1574	0.0156	6.983e-24	exonic (missense variant)	PAX3	5	27.7	T14L13	223046616	223102579
	Cbm_Right_CrusI	rs2600786	2	237614357	2q37.3	A	G	0.237	T14V17	0.0526	0.0074	1.13e-12	intergenic	ACKR3(dist=123363),LOC93463(dist=342885)	1f	8.704	T14L14	237614291	237637544
	Cbm_Right_CrusI	rs1016584	3	89343169	3p11.1	T	C	0.4538	T14V18	0.0412	0.0063	7.897e-11	intronic	EPHA3	6	1.065	T14L15	89273019	89442305
	Cbm_Right_CrusI	rs11716850	3	134966964	3q22.2	T	C	0.1466	T14V19	-0.0612	0.0089	5.982e-12	intronic	EPHB1	5	4.371	T14L16	134966964	135047462
	Cbm_Right_CrusI	rs2172442	4	4762383	4p16.2	C	G	0.6799	T14V20	0.0563	0.0068	9.115e-17	intergenic	STX18-AS1(dist=49719),LOC101928279(dist=1104)	4	0.005	T14L17	4753207	4835498
	Cbm_Right_CrusI	rs4865162	4	57767822	4q12	A	G	0.4246	T14V21	-0.0568	0.0064	5.257e-19	intergenic	SPINK2(dist=79787),REST(dist=6244)	1f	0.437	T14L18	57700901	57916815
	Cbm_Right_CrusI	rs1605761	4	121120419	4q27	T	C	0.1038	T14V22	0.0791	0.0104	2.407e-14	intergenic	MAD2L1(dist=132416),PRDM5(dist=492649)	6	0.271	T14L19	121013598	121383614
	Cbm_Right_CrusI	rs6889193	5	67452326	5q13.1	A	G	0.3805	T14V23	-0.0407	0.0065	3.401e-10	intergenic	LOC101928858(dist=355440),LINC02219(dist=33378)	7	0.022	T14L20	67442243	67486464
	Cbm_Right_CrusI	rs17560514	5	88189025	5q14.3	A	G	0.2299	T14V24	-0.0527	0.0075	2.32e-12	ncRNA_intronic	MEF2C-AS1	7	0.72	T14L21	88182026	88208146
	Cbm_Right_CrusI	rs2920507	5	89419677	5q14.3	A	C	0.3102	T14V25	0.0723	0.0068	2.99e-26	intergenic	MIR3660(dist=107140),LINC01339(dist=34479)	5	22	T14L22	89254428	89480176
	Cbm_Right_CrusI	rs10793821	5	133836209	5q31.1	T	C	0.5681	T14V26	-0.0436	0.0065	1.627e-11	intergenic	LOC102546229(dist=65471),LINC01843(dist=6034)	1f	1.137	T14L23	133828356	133865452
	Cbm_Right_CrusI	rs7701020	5	158369272	5q33.3	A	T	0.6426	T14V27	0.0475	0.0065	3.948e-13	intronic	EBF1	4	4.779	T14L24	158220492	158389477
	Cbm_Right_CrusI	rs1577469	6	8462188	6p24.3	A	G	0.4972	T14V28	0.0399	0.0063	1.696e-10	ncRNA_intronic	LOC100506207	1f	12.2
	Cbm_Right_CrusI	rs72831708	6	8730954	6p24.3	T	G	0.0626	T14V29	0.1284	0.013	6.003e-23	ncRNA_intronic	LOC100506207	1f	1.107	T14L25	8359791	8852605
	Cbm_Right_CrusI	rs7749497	6	22473718	6p22.3	A	T	0.786	T14V30	-0.0539	0.0079	1.074e-11	intergenic	PRL(dist=170654),HDGFL1(dist=96077)	2b	1.451
	Cbm_Right_CrusI	rs4711014	6	22491435	6p22.3	A	G	0.3278	T14V31	-0.0591	0.0067	1.563e-18	intergenic	PRL(dist=188371),HDGFL1(dist=78360)	7	1.746	T14L26	22382204	22620904
	Cbm_Right_CrusI	rs6899930	6	37111059	6p21.2	T	C	0.3385	T14V32	-0.0418	0.0069	1.108e-09	intergenic	FGD2(dist=114214),PIM1(dist=26869)	1f	0.41	T14L27	37100555	37111059
	Cbm_Right_CrusI	rs79925073	6	98050838	6q16.1	A	C	0.0138	T14V33	0.1647	0.0271	1.227e-09	ncRNA_intronic	LOC101927314	5	1.43	T14L28	98036741	98139320
	Cbm_Right_CrusI	rs9375711	6	99297389	6q16.1	A	T	0.3287	T14V34	-0.0466	0.0068	9.175e-12	intergenic	POU3F2(dist=10055),FBXL4(dist=19022)	7	4.795	T14L29	99268096	100139801
	Cbm_Right_CrusI	rs549632	6	100132370	6q16.2	T	G	0.805	T14V35	0.0501	0.0079	2.563e-10	intergenic	PRDM13(dist=68916),MCHR2(dist=234027)	1f	0.953
	Cbm_Right_CrusI	rs9456885	6	164242262	6q26	T	G	0.5648	T14V36	-0.0454	0.0064	1.101e-12	intergenic	LOC102724152(dist=149746),MEAT6(dist=964604)	2b	16.44	T14L30	164211973	164271347
	Cbm_Right_CrusI	rs3779381	7	120966790	7q31.31	A	G	0.7375	T14V37	-0.0453	0.0072	2.891e-10	intronic	WNT16	7	3.316	T14L31	120927706	121025502
	Cbm_Right_CrusI	rs78455662	7	132197784	7q32.3	T	C	0.0742	T14V38	-0.1007	0.012	6.143e-17	intronic	PLXNA4	5	0.843
	Cbm_Right_CrusI	rs885736	7	132201777	7q32.3	T	C	0.4894	T14V39	-0.0679	0.0063	3.104e-27	intronic	PLXNA4	5	0.376	T14L32	132185123	132367387
	Cbm_Right_CrusI	rs7806862	7	132275850	7q32.3	A	C	0.6924	T14V40	-0.0478	0.007	7.581e-12	intronic	PLXNA4	4	2.726
	Cbm_Right_CrusI	rs58357751	8	77595642	8q21.11	A	C	0.0609	T14V41	0.1246	0.0132	5.392e-21	intronic	ZFHX4	2b	11.14	T14L33	77517038	78764234
	Cbm_Right_CrusI	rs7826554	8	78651309	8q21.12	A	C	0.3457	T14V42	0.0417	0.0067	3.685e-10	intergenic	LOC102724874(dist=262742),PKIA(dist=777266)	7	4.337
	Cbm_Right_CrusI	rs10217651	9	118923652	9q33.1	A	G	0.389	T14V43	0.0568	0.0065	2.54e-18	intronic	PAPPA	4	6.443
	Cbm_Right_CrusI	rs72754248	9	119061396	9q33.1	A	G	0.0706	T14V44	0.2074	0.0123	6.619e-64	intronic	PAPPA	2b	13.23	T14L34	118918479	119481253
	Cbm_Right_CrusI	rs1885983	9	119078356	9q33.1	A	G	0.3422	T14V45	-0.0462	0.0066	3.264e-12	intronic	PAPPA	1d	1.091
	Cbm_Right_CrusI	rs10817872	9	119125449	9q33.1	A	T	0.6156	T14V46	-0.0434	0.0065	2.874e-11	intronic	PAPPA	5	5.542
	Cbm_Right_CrusI	rs117674093	9	119242694	9q33.1	T	C	0.938	T14V47	0.0834	0.013	1.461e-10	intronic	ASTN2	1f	0.464
	Cbm_Right_CrusI	rs72828403	10	122871128	10q26.12	A	G	0.9317	T14V48	0.1136	0.0124	6.293e-20	intergenic	WDR11(dist=202092),FGFR2(dist=366716)	5	9.274	T14L35	122841052	122875878
	Cbm_Right_CrusI	rs10750497	11	131975079	11q25	C	G	0.2869	T14V49	0.0469	0.007	1.747e-11	intronic	NTM	1f	1.241	T14L36	131929080	131994544
	Cbm_Right_CrusI	rs7973378	12	102483273	12q23.2	A	G	0.7568	T14V50	-0.0449	0.0073	1.02e-09	intronic	NUP37	1f	5.588
	Cbm_Right_CrusI	rs703545	12	102943000	12q23.2	A	G	0.1581	T14V51	-0.0552	0.0087	2.509e-10	intergenic	IGF1(dist=68659),LINC00485(dist=260061)	5	0.186	T14L37	102407432	103937666
	Cbm_Right_CrusI	rs9645789	12	103925129	12q23.3	T	G	0.9517	T14V52	-0.0929	0.0147	3.052e-10	intergenic	LOC105369945(dist=33656),LINC02401(dist=16443)	7	0.368
	Cbm_Right_CrusI	rs34423035	12	130319808	12q24.33	C	G	0.8764	T14V53	-0.0626	0.0097	8.668e-11	intronic	TMEM132D	7	0.4	T14L38	130319560	130346640
	Cbm_Right_CrusI	rs539496	13	27137385	13q12.13	T	C	0.1924	T14V54	0.0623	0.008	7.362e-15	intronic	WASF3	1f	1.144	T14L39	27087417	27220318
	Cbm_Right_CrusI	rs696908	13	103618857	13q33.1	C	G	0.3735	T14V55	0.0641	0.0065	9.131e-23	intergenic	METTL21EP(dist=70474),SLC10A2(dist=77491)	5	0.481
	Cbm_Right_CrusI	rs67359979	13	103668545	13q33.1	A	G	0.11	T14V56	-0.0646	0.0101	1.68e-10	intergenic	METTL21EP(dist=120162),SLC10A2(dist=27803)	4	2.577
	Cbm_Right_CrusI	rs3005621	13	103928857	13q33.1	T	G	0.1879	T14V57	-0.0918	0.0081	4.827e-30	intergenic	SLC10A2(dist=210090),LINC01309(dist=148693)	4	19.11	T14L40	103592244	104755303
	Cbm_Right_CrusI	rs1398586	13	104750688	13q33.1	A	C	0.1344	T14V58	-0.0696	0.0093	5.536e-14	intergenic	LINC01309(dist=670653),DAOA-AS1(dist=1360718)	5	2.529
	Cbm_Right_CrusI	rs995526	14	57552534	14q22.3	A	G	0.2406	T14V59	-0.0551	0.0073	6.74e-14	intergenic	OTX2-AS1(dist=154508),EXOC5(dist=114691)	1f	13.65
	Cbm_Right_CrusI	rs76350445	14	57623935	14q22.3	T	C	0.0679	T14V60	-0.1903	0.0125	6.229e-52	intergenic	OTX2-AS1(dist=225909),EXOC5(dist=43290)	7	0.562	T14L41	57482739	57831950
	Cbm_Right_CrusI	rs10137379	14	57674867	14q22.3	T	C	0.859	T14V61	0.0783	0.009	2.864e-18	UTR3	EXOC5(NM_006544:c.*460A>G)	6	12.88
	Cbm_Right_CrusI	rs754945	14	69234067	14q24.1	A	G	0.125	T14V62	-0.0741	0.0095	7.269e-15	intergenic	RAD51B(dist=84244),ZFP36L1(dist=20305)	2b	1.877
	Cbm_Right_CrusI	rs927292	14	69258841	14q24.1	C	G	0.3227	T14V63	-0.0487	0.0067	4.454e-13	intronic	ZFP36L1	2b	10.46
	Cbm_Right_CrusI	rs1547050	14	69274950	14q24.1	T	C	0.3124	T14V64	0.098	0.0068	6.571e-47	intergenic	ZFP36L1(dist=11990),ACTN1(dist=65890)	5	0.033	T14L42	69138011	69316200
	Cbm_Right_CrusI	rs10129303	14	86315004	14q31.3	A	T	0.3808	T14V65	0.0544	0.0067	5.627e-16	intergenic	FLRT2(dist=194232),LINC02328(dist=86018)	6	2.98	T14L43	86275733	86341618
	Cbm_Right_CrusI	rs57919607	14	99750235	14q32.2	A	G	0.1251	T14V66	0.0623	0.0096	7.491e-11	intergenic	BCL11B(dist=11701),SETD3(dist=113850)	4	0.057	T14L44	99737205	99750235
	Cbm_Right_CrusI	rs8035136	15	47977010	15q21.1	A	G	0.6596	T14V67	0.0492	0.0068	3.379e-13	intronic	SEMA6D	6	6.97	T14L45	47870186	47977010
	Cbm_Right_CrusI	rs8028912	15	67876277	15q23	A	G	0.9143	T14V68	-0.1571	0.0113	3.486e-44	intronic	MAP2K5	1f	0.136	T14L46	67502838	68323964
	Cbm_Right_CrusI	rs188266808	15	68279295	15q23	A	T	0.9762	T14V69	-0.1467	0.0207	1.398e-12	intergenic	RNU6-9(dist=146912),PIAS1(dist=67222)	6	0.392
	Cbm_Right_CrusI	rs62029124	16	49481891	16q12.1	T	C	0.2297	T14V70	-0.069	0.0075	2.941e-20	intergenic	C16orf78(dist=48549),ZNF423(dist=39545)	7	3.382	T14L47	49391164	49491235
	Cbm_Right_CrusI	rs12960444	18	44607314	18q21.1	T	C	0.5436	T14V71	-0.0474	0.0063	6.705e-14	intronic	KATNAL2	1f	8.244	T14L48	44342225	44956039
	Cbm_Right_CrusI	rs78229985	18	44820823	18q21.1	T	C	0.9933	T14V72	0.2736	0.0388	1.665e-12	ncRNA_intronic	MIR4527HG	5	0.859
	Cbm_Right_CrusI	rs4891263	18	73017428	18q22.3	C	G	0.6633	T14V73	0.0919	0.0067	7.316e-43	intergenic	TSHZ1(dist=15523),SMIM21(dist=104003)	4	0.176	T14L49	72984937	73071083
	Cbm_Right_CrusI	rs66500423	19	41195170	19q13.2	T	C	0.6878	T14V74	0.0443	0.0068	8.78e-11	intronic	NUMBL	1f	14.34	T14L50	41173372	41195170
	Cbm_Right_CrusI	rs8127603	21	33886658	21q22.11	T	C	0.7261	T14V75	-0.0532	0.0071	5.056e-14	intronic	EVA1C	1f	2.793	T14L51	33864739	33986839
	Cbm_Left_CrusII	rs34263105	1	227459063	1q42.13	T	C	0.8584	T15V1	-0.0592	0.0094	2.887e-10	intronic	CDC42BPA	1f	0.58	T15L1	227217725	227509822
	Cbm_Left_CrusII	rs17749164	1	231897207	1q42.2	T	C	0.5981	T15V2	0.0506	0.0067	4.075e-14	ncRNA_intronic	TSNAX-DISC1	5	1.784	T15L2	231897207	231900971
	Cbm_Left_CrusII	rs112898427	2	67561335	2p14	T	C	0.7012	T15V3	0.0697	0.0074	2.51e-21	intergenic	LINC01828(dist=44959),ETAA1(dist=63130)	5	0.434	T15L3	67472545	67693591
	Cbm_Left_CrusII	rs4613306	2	102305078	2q11.2	A	C	0.7142	T15V4	0.0457	0.0073	3.405e-10	intergenic	RFX8(dist=213504),MAP4K4(dist=9087)	1f	5.865	T15L4	102298722	102569430
	Cbm_Left_CrusII	rs6714490	2	207907469	2q33.3	A	G	0.7376	T15V5	0.0502	0.0074	1.357e-11	intergenic	CPO(dist=73271),KLF7(dist=31393)	4	12.43
	Cbm_Left_CrusII	rs6739830	2	208082651	2q33.3	A	G	0.4119	T15V6	-0.0542	0.0067	5.599e-16	ncRNA_intronic	MYOSLID-AS1	1f	0.294	T15L5	207867825	208100161
	Cbm_Left_CrusII	rs2234675	2	223085955	2q36.1	T	G	0.0423	T15V7	-0.1205	0.0162	1.102e-13	exonic (missense variant)	PAX3	5	27.7	T15L6	223057209	223102579
	Cbm_Left_CrusII	rs4689933	4	4761140	4p16.2	T	C	0.6801	T15V8	0.0463	0.0071	5.42e-11	intergenic	STX18-AS1(dist=48476),LOC101928279(dist=2347)	4	19.71	T15L7	4754484	4762383
	Cbm_Left_CrusII	rs4865165	4	57765546	4q12	T	C	0.4987	T15V9	0.0635	0.0065	2.906e-22	intergenic	SPINK2(dist=77511),REST(dist=8520)	1f	9.079	T15L8	57714659	57916815
	Cbm_Left_CrusII	rs72731840	4	147535490	4q31.22	A	C	0.7845	T15V10	0.0805	0.008	4.615e-24	intergenic	SLC10A7(dist=92367),POU4F2(dist=24555)	1f	2.321	T15L9	147469546	147990377
	Cbm_Left_CrusII	rs55974445	4	147893585	4q31.22	T	G	0.7121	T15V11	0.0523	0.0072	4.607e-13	intergenic	TTC29(dist=26547),MIR548G(dist=372196)	1f	3.654
	Cbm_Left_CrusII	rs329124	5	133865452	5q31.1	A	G	0.5747	T15V12	0.041	0.0066	6.284e-10	intronic	JADE2	1f	7.783	T15L10	133861663	133865452
	Cbm_Left_CrusII	rs4711000	6	22099484	6p22.3	T	C	0.5504	T15V13	0.0449	0.0066	9.214e-12	ncRNA_intronic	CASC15	4	16.87	T15L11	22099484	22107290
	Cbm_Left_CrusII	rs1026149	6	45753819	6p21.1	A	T	0.7478	T15V14	0.0472	0.0076	4.767e-10	intergenic	RUNX2(dist=235000),CLIC5(dist=112374)	4	0.544	T15L12	45739550	45754272
	Cbm_Left_CrusII	rs34041659	7	103373126	7q22.1	T	C	0.8413	T15V15	0.0664	0.009	1.565e-13	intronic	RELN	6	7.536	T15L13	103326246	103392094
	Cbm_Left_CrusII	rs10242100	7	120983343	7q31.31	A	G	0.7185	T15V16	-0.065	0.0073	5.002e-19	intergenic	WNT16(dist=2185),FAM3C(dist=5562)	1f	5.256	T15L14	120920827	121040782
	Cbm_Left_CrusII	rs4304216	7	156092669	7q36.3	A	T	0.4167	T15V17	-0.0459	0.0066	4.865e-12	intergenic	LOC389602(dist=331584),LOC285889(dist=137814)	6	1.832
	Cbm_Left_CrusII	rs13224561	7	156161063	7q36.3	A	G	0.5317	T15V18	-0.048	0.0067	8.438e-13	intergenic	LOC389602(dist=399978),LOC285889(dist=69420)	3a	1.394	T15L15	156066865	156170722
	Cbm_Left_CrusII	rs9693928	8	78801789	8q21.12	T	G	0.3229	T15V19	-0.0488	0.007	3.713e-12	intergenic	LOC102724874(dist=413222),PKIA(dist=626786)	7	2.233	T15L16	78645616	78832128
	Cbm_Left_CrusII	rs7874933	9	2622554	9p24.2	T	C	0.1848	T15V20	0.0583	0.0087	2.243e-11	intronic	VLDLR	1f	10.72	T15L17	2622554	2622554
	Cbm_Left_CrusII	rs10961628	9	14633286	9p22.3	A	G	0.4331	T15V21	0.0417	0.0066	2.429e-10	intronic	ZDHHC21	1f	1.842	T15L18	14593749	14636946
	Cbm_Left_CrusII	rs10217305	9	118923442	9q33.1	C	G	0.6327	T15V22	-0.0428	0.0068	3.781e-10	intronic	PAPPA	4	3.427
	Cbm_Left_CrusII	rs72754248	9	119061396	9q33.1	A	G	0.0706	T15V23	0.1941	0.0128	3.258e-52	intronic	PAPPA	2b	13.23	T15L19	118918479	119479868
	Cbm_Left_CrusII	rs34278882	9	119257528	9q33.1	T	G	0.7601	T15V24	0.0513	0.0077	2.106e-11	intronic	ASTN2	1f	1.49
	Cbm_Left_CrusII	rs1678612	10	73859389	10q22.1	A	C	0.4527	T15V25	0.0459	0.0066	2.941e-12	intronic	ASCC1	1f	0.403	T15L20	73828748	73920631
	Cbm_Left_CrusII	rs11202604	10	89709901	10q23.31	T	C	0.1314	T15V26	-0.0613	0.0098	3.864e-10	intronic	PTEN	5	1.259	T15L21	89709901	89890451
	Cbm_Left_CrusII	rs78640054	10	122841052	10q26.12	A	G	0.0648	T15V27	0.1161	0.0133	3.257e-18	intergenic	WDR11(dist=172016),FGFR2(dist=396792)	2b	20.5	T15L22	122833144	122886458
	Cbm_Left_CrusII	rs2248168	10	122853969	10q26.12	T	G	0.0868	T15V28	-0.0791	0.0125	2.282e-10	intergenic	WDR11(dist=184933),FGFR2(dist=383875)	5	1.117
	Cbm_Left_CrusII	rs113315888	11	31269153	11p13	T	C	0.984	T15V29	0.1673	0.0262	1.634e-10	intronic	DCDC1	5	19.66	T15L23	31048056	31783582
	Cbm_Left_CrusII	rs703545	12	102943000	12q23.2	A	G	0.1581	T15V30	-0.0609	0.0091	1.812e-11	intergenic	IGF1(dist=68659),LINC00485(dist=260061)	5	0.186	T15L24	102929003	102947650
	Cbm_Left_CrusII	rs696170	13	103614606	13q33.1	T	C	0.3733	T15V31	-0.0689	0.0068	2.707e-24	intergenic	METTL21EP(dist=66223),SLC10A2(dist=81742)	7	19.27	T15L25	103578435	103684498
	Cbm_Left_CrusII	rs73587128	13	104754204	13q33.1	A	G	0.8805	T15V32	-0.0797	0.0101	3.857e-15	intergenic	LINC01309(dist=674169),DAOA-AS1(dist=1357202)	6	7.895	T15L26	104651935	104755303
	Cbm_Left_CrusII	rs35660835	14	57318263	14q22.3	A	C	0.7853	T15V33	-0.0565	0.008	1.649e-12	ncRNA_intronic	OTX2-AS1	7	3.614
	Cbm_Left_CrusII	rs12892713	14	57574554	14q22.3	A	G	0.2993	T15V34	-0.0634	0.0072	9.292e-19	intergenic	OTX2-AS1(dist=176528),EXOC5(dist=92671)	7	1.689
	Cbm_Left_CrusII	rs117332043	14	57617154	14q22.3	T	C	0.0681	T15V35	0.2021	0.013	2.226e-54	intergenic	OTX2-AS1(dist=219128),EXOC5(dist=50071)	5	0.282	T15L27	57301041	57831950
	Cbm_Left_CrusII	rs75903588	14	57709152	14q22.3	T	C	0.0799	T15V36	0.0819	0.012	1.06e-11	intronic	EXOC5	7	0.098
	Cbm_Left_CrusII	rs1957796	14	86283548	14q31.3	T	C	0.3806	T15V37	-0.0431	0.0067	1.644e-10	intergenic	FLRT2(dist=162776),LINC02328(dist=117474)	7	2.209	T15L28	86275733	86319868
	Cbm_Left_CrusII	rs10131783	14	99740208	14q32.2	A	G	0.1284	T15V38	-0.0758	0.0097	6.885e-15	intergenic	BCL11B(dist=1674),SETD3(dist=123877)	4	9.896	T15L29	99708876	99751267
	Cbm_Left_CrusII	rs1441819	15	58243204	15q21.3	A	G	0.4456	T15V39	0.0454	0.0066	7.349e-12	intergenic	GCOM1(dist=233449),ALDH1A2(dist=2418)	1f	0.095	T15L30	58215727	58374707
	Cbm_Left_CrusII	rs1971374	17	43659738	17q21.31	T	C	0.7919	T15V40	0.0546	0.008	1.042e-11	intergenic	ARL17A(dist=36036),MAPK8IP1P2(dist=17731)	4	3.435	T15L31	43566931	44865603
	Cbm_Left_CrusII	rs538628	17	44787313	17q21.31	C	G	0.2109	T15V41	-0.0532	0.008	2.818e-11	intronic	NSF	7	1.545
	Cbm_Left_CrusII	rs4793497	17	68651481	17q24.3	A	G	0.765	T15V42	0.0565	0.0078	6.219e-13	intergenic	KCNJ2(dist=475298),CASC17(dist=442434)	1f	19.68	T15L32	68651481	68651481
	Cbm_Left_CrusII	rs13381941	18	19154143	18q11.2	A	G	0.3414	T15V43	-0.0416	0.0069	1.343e-09	exonic (missense variant)	ESCO1	1f	0.66	T15L33	19114012	19360576
	Cbm_Left_CrusII	rs4891262	18	73017380	18q22.3	T	C	0.3511	T15V44	0.0876	0.0069	2.679e-37	intergenic	TSHZ1(dist=15475),SMIM21(dist=104051)	2b	0.08	T15L34	72984937	73078689
	Cbm_Left_CrusII	rs17056851	18	73062920	18q22.3	A	G	0.2196	T15V45	-0.0482	0.0079	8.296e-10	intergenic	TSHZ1(dist=61015),SMIM21(dist=58511)	4	0.788
	Cbm_Left_CrusII	rs6079584	20	14840502	20p12.1	A	C	0.5777	T15V46	0.0515	0.0066	7.696e-15	intronic	MACROD2	4	6.402	T15L35	14697386	14914709
	Cbm_Right_CrusII	rs17749164	1	231897207	1q42.2	T	C	0.5981	T16V1	0.069	0.0066	1.844e-25	ncRNA_intronic	TSNAX-DISC1	5	1.784	T16L1	231883443	231908347
	Cbm_Right_CrusII	rs10929405	2	16135423	2p24.3	T	C	0.5731	T16V2	-0.0466	0.0066	1.404e-12	intergenic	MYCN(dist=48298),GACAT3(dist=55126)	1f	5.524	T16L2	16130064	16153772
	Cbm_Right_CrusII	rs112898427	2	67561335	2p14	T	C	0.7012	T16V3	0.0796	0.0073	6.578e-28	intergenic	LINC01828(dist=44959),ETAA1(dist=63130)	5	0.434	T16L3	67449899	67768325
	Cbm_Right_CrusII	rs2683687	2	67758663	2p14	A	G	0.6724	T16V4	-0.0426	0.0069	7.17e-10	intergenic	ETAA1(dist=119442),LINC01812(dist=264523)	6	1.295
	Cbm_Right_CrusII	rs6739830	2	208082651	2q33.3	A	G	0.4119	T16V5	-0.0523	0.0066	2.676e-15	ncRNA_intronic	MYOSLID-AS1	1f	0.294	T16L4	207999582	208114245
	Cbm_Right_CrusII	rs2234675	2	223085955	2q36.1	T	G	0.0423	T16V6	-0.1326	0.016	1.413e-16	exonic (missense variant)	PAX3	5	27.7	T16L5	223046616	223145477
	Cbm_Right_CrusII	rs16863647	2	223145477	2q36.1	C	G	0.2494	T16V7	-0.0469	0.0075	3.916e-10	intronic	PAX3	4	1.575
	Cbm_Right_CrusII	rs10196267	2	237630295	2q37.3	A	G	0.5803	T16V8	0.0442	0.0066	1.865e-11	intergenic	ACKR3(dist=139301),LOC93463(dist=326947)	1f	0.112	T16L6	237601296	237644199
	Cbm_Right_CrusII	rs144848844	3	89400269	3p11.1	A	C	0.5728	T16V9	0.0436	0.0069	2.268e-10	intronic	EPHA3	4	0.415	T16L7	89279467	90390418
	Cbm_Right_CrusII	rs4689933	4	4761140	4p16.2	T	C	0.6801	T16V10	0.0508	0.007	3.478e-13	intergenic	STX18-AS1(dist=48476),LOC101928279(dist=2347)	4	19.71	T16L8	4754484	4778175
	Cbm_Right_CrusII	rs781550	4	57729256	4q12	A	G	0.0904	T16V11	0.0728	0.0113	1.251e-10	intergenic	SPINK2(dist=41221),REST(dist=44810)	1b	1.69
	Cbm_Right_CrusII	rs4865165	4	57765546	4q12	T	C	0.4987	T16V12	0.0575	0.0065	5.836e-19	intergenic	SPINK2(dist=77511),REST(dist=8520)	1f	9.079	T16L9	57713093	57903268
	Cbm_Right_CrusII	rs72731840	4	147535490	4q31.22	A	C	0.7845	T16V13	0.0671	0.0079	1.515e-17	intergenic	SLC10A7(dist=92367),POU4F2(dist=24555)	1f	2.321	T16L10	147472232	147580638
	Cbm_Right_CrusII	rs4711000	6	22099484	6p22.3	T	C	0.5504	T16V14	0.049	0.0065	5.289e-14	ncRNA_intronic	CASC15	4	16.87	T16L11	22099484	22513914
	Cbm_Right_CrusII	rs6922448	6	22513914	6p22.3	A	G	0.5755	T16V15	0.0433	0.0066	3.968e-11	intergenic	PRL(dist=210850),HDGFL1(dist=55881)	4	5.336
	Cbm_Right_CrusII	rs2820234	6	35002013	6p21.31	A	C	0.5201	T16V16	0.0409	0.0065	3.425e-10	intronic	ANKS1A	1f	4.919	T16L12	34904092	35013209
	Cbm_Right_CrusII	rs626065	7	103371039	7q22.1	A	T	0.454	T16V17	-0.0531	0.0065	3.523e-16	intronic	RELN	7	4.127	T16L13	103228781	103392418
	Cbm_Right_CrusII	rs201874085	7	103386910	7q22.1	T	C	0.9219	T16V18	-0.0762	0.0124	7.702e-10	intronic	RELN	7	1.285
	Cbm_Right_CrusII	rs10242100	7	120983343	7q31.31	A	G	0.7185	T16V19	-0.056	0.0072	9.028e-15	intergenic	WNT16(dist=2185),FAM3C(dist=5562)	1f	5.256	T16L14	120960271	121040782
	Cbm_Right_CrusII	rs11505249	7	156082550	7q36.3	A	G	0.5252	T16V20	-0.0534	0.0065	2.581e-16	intergenic	LOC389602(dist=321465),LOC285889(dist=147933)	1f	0.436	T16L15	156066471	156175854
	Cbm_Right_CrusII	rs36071136	7	156166303	7q36.3	C	G	0.5747	T16V21	-0.0474	0.0066	4.762e-13	intergenic	LOC389602(dist=405218),LOC285889(dist=64180)	4	1.05
	Cbm_Right_CrusII	rs1914929	8	78651049	8q21.12	A	G	0.3461	T16V22	-0.0517	0.0068	3.875e-14	intergenic	LOC102724874(dist=262482),PKIA(dist=777526)	7	1.104	T16L16	78637869	78868011
	Cbm_Right_CrusII	rs7834152	8	142042870	8q24.3	T	C	0.5858	T16V23	0.0405	0.0066	1.018e-09	intergenic	PTK2(dist=30692),DENND3(dist=95818)	1b	15.33	T16L17	142033034	142042870
	Cbm_Right_CrusII	rs7874933	9	2622554	9p24.2	T	C	0.1848	T16V24	0.0546	0.0086	2.464e-10	intronic	VLDLR	1f	10.72	T16L18	2621482	2622554
	Cbm_Right_CrusII	rs10810192	9	14631417	9p22.3	T	C	0.5663	T16V25	-0.0413	0.0065	2.447e-10	intronic	ZDHHC21	1f	2.933	T16L19	14604580	14636946
	Cbm_Right_CrusII	rs2672813	9	98781179	9q22.32	A	G	0.4397	T16V26	0.0417	0.0065	1.552e-10	downstream	ERCC6L2,LINC00092(dist=835)	1f	1.016	T16L20	98580361	98803415
	Cbm_Right_CrusII	rs10217305	9	118923442	9q33.1	C	G	0.6327	T16V27	-0.0516	0.0068	2.202e-14	intronic	PAPPA	4	3.427
	Cbm_Right_CrusII	rs72754248	9	119061396	9q33.1	A	G	0.0706	T16V28	0.1567	0.0126	2.525e-35	intronic	PAPPA	2b	13.23	T16L21	118918479	119472659
	Cbm_Right_CrusII	rs34278882	9	119257528	9q33.1	T	G	0.7601	T16V29	0.0486	0.0076	1.405e-10	intronic	ASTN2	1f	1.49
	Cbm_Right_CrusII	rs4922553	10	48488242	10q11.22	T	C	0.1934	T16V30	0.0533	0.0082	9.076e-11	intergenic	GDF10(dist=49077),PTPN20(dist=248798)	7	1.155
	Cbm_Right_CrusII	rs9422357	10	48650196	10q11.22	A	G	0.9122	T16V31	-0.0762	0.0114	2.74e-11	intergenic	GDF10(dist=211031),PTPN20(dist=86844)	1f	0.782	T16L22	48482576	48660703
	Cbm_Right_CrusII	rs1678612	10	73859389	10q22.1	A	C	0.4527	T16V32	0.0407	0.0065	3.973e-10	intronic	ASCC1	1f	0.403	T16L23	73828748	73906150
	Cbm_Right_CrusII	rs58513280	10	89890451	10q23.31	A	G	0.841	T16V33	0.0605	0.0091	2.991e-11	intergenic	PTEN(dist=158764),RNLS(dist=143170)	6	0.101	T16L24	89709901	89890451
	Cbm_Right_CrusII	rs78640054	10	122841052	10q26.12	A	G	0.0648	T16V34	0.1291	0.0132	1.327e-22	intergenic	WDR11(dist=172016),FGFR2(dist=396792)	2b	20.5	T16L25	122841052	122871128
	Cbm_Right_CrusII	rs1960181	11	9046767	11p15.4	A	C	0.2478	T16V35	0.0464	0.0075	8.021e-10	intronic	SCUBE2	1f	3.142	T16L26	8850990	9066476
	Cbm_Right_CrusII	rs703545	12	102943000	12q23.2	A	G	0.1581	T16V36	-0.0592	0.009	3.918e-11	intergenic	IGF1(dist=68659),LINC00485(dist=260061)	5	0.186	T16L27	102929003	102947650
	Cbm_Right_CrusII	rs696170	13	103614606	13q33.1	T	C	0.3733	T16V37	-0.07	0.0067	1.525e-25	intergenic	METTL21EP(dist=66223),SLC10A2(dist=81742)	7	19.27	T16L28	103578435	103684498
	Cbm_Right_CrusII	rs713607	13	104750929	13q33.1	A	G	0.1345	T16V38	0.0893	0.0095	3.496e-21	intergenic	LINC01309(dist=670894),DAOA-AS1(dist=1360477)	2b	0.024	T16L29	104634237	104755303
	Cbm_Right_CrusII	rs12892713	14	57574554	14q22.3	A	G	0.2993	T16V39	-0.0644	0.0071	1.068e-19	intergenic	OTX2-AS1(dist=176528),EXOC5(dist=92671)	7	1.689
	Cbm_Right_CrusII	rs117332043	14	57617154	14q22.3	T	C	0.0681	T16V40	0.1985	0.0129	1.221e-53	intergenic	OTX2-AS1(dist=219128),EXOC5(dist=50071)	5	0.282	T16L30	57482739	57831950
	Cbm_Right_CrusII	rs79191875	14	57684250	14q22.3	T	C	0.8591	T16V41	-0.0611	0.0092	3.693e-11	intronic	EXOC5	7	9.503
	Cbm_Right_CrusII	rs10131783	14	99740208	14q32.2	A	G	0.1285	T16V42	-0.0683	0.0096	1.363e-12	intergenic	BCL11B(dist=1674),SETD3(dist=123877)	4	9.896	T16L31	99733954	99750520
	Cbm_Right_CrusII	rs1441819	15	58243204	15q21.3	A	G	0.4456	T16V43	0.0454	0.0066	4.213e-12	intergenic	GCOM1(dist=233449),ALDH1A2(dist=2418)	1f	0.095	T16L32	58188859	58377913
	Cbm_Right_CrusII	rs4528531	15	82322075	15q25.2	A	G	0.7086	T16V44	0.0495	0.0071	3.919e-12	intergenic	TMC3-AS1(dist=586658),MEX3B(dist=12044)	1f	0.057	T16L33	82263265	82348088
	Cbm_Right_CrusII	rs2696430	17	44338279	17q21.31	C	G	0.2282	T16V45	-0.0528	0.0078	1.708e-11	intergenic	KANSL1(dist=35539),ARL17B(dist=13271)	1f	7.984	T16L34	43475929	44865498
	Cbm_Right_CrusII	rs13381941	18	19154143	18q11.2	A	G	0.3414	T16V46	-0.0433	0.0068	1.902e-10	exonic (missense variant)	ESCO1	1f	0.66	T16L35	18538233	19360576
	Cbm_Right_CrusII	rs4891262	18	73017380	18q22.3	T	C	0.3511	T16V47	0.083	0.0068	2.495e-34	intergenic	TSHZ1(dist=15475),SMIM21(dist=104051)	2b	0.08	T16L36	72993134	73078689
	Cbm_Right_CrusII	rs17056851	18	73062920	18q22.3	A	G	0.2196	T16V48	-0.0469	0.0078	1.609e-09	intergenic	TSHZ1(dist=61015),SMIM21(dist=58511)	4	0.788
	Cbm_Right_CrusII	rs6079584	20	14840502	20p12.1	A	C	0.5777	T16V49	0.0431	0.0066	4.715e-11	intronic	MACROD2	4	6.402	T16L37	14705888	14841737
	Cbm_Left_VIIb	rs17749164	1	231897207	1q42.2	T	C	0.5981	T17V1	0.0424	0.0063	1.43e-11	ncRNA_intronic	TSNAX-DISC1	5	1.784	T17L1	231897207	231900971
	Cbm_Left_VIIb	rs57933401	2	16144383	2p24.3	A	G	0.2677	T17V2	0.0478	0.007	6.781e-12	intergenic	MYCN(dist=57258),GACAT3(dist=46166)	5	1.278	T17L2	16130064	16153772
	Cbm_Left_VIIb	rs6739830	2	208082651	2q33.3	A	G	0.4119	T17V3	-0.0441	0.0063	1.914e-12	ncRNA_intronic	MYOSLID-AS1	1f	0.294	T17L3	208017033	208100161
	Cbm_Left_VIIb	rs2234675	2	223085955	2q36.1	T	G	0.0423	T17V4	-0.1167	0.0152	1.665e-14	exonic (missense variant)	PAX3	5	27.7	T17L4	223046616	223102579
	Cbm_Left_VIIb	rs11727676	4	145659064	4q31.21	T	C	0.9052	T17V5	0.0721	0.0105	5.902e-12	exonic (synonymous variant)	HHIP	5	12.31	T17L5	145597759	146087979
	Cbm_Left_VIIb	rs4397121	5	112427880	5q22.2	A	G	0.6274	T17V6	0.0398	0.0064	3.731e-10	intronic	MCC	1b	1.117	T17L6	112388225	112441704
	Cbm_Left_VIIb	rs7769624	6	148535313	6q24.3	A	C	0.428	T17V7	-0.0473	0.0062	3.049e-14	intergenic	SAMD5(dist=644156),SASH1(dist=58151)	1f	0.679	T17L7	148521292	148556084
	Cbm_Left_VIIb	rs36013171	7	156160511	7q36.3	T	C	0.5432	T17V8	-0.0407	0.0062	4.216e-11	intergenic	LOC389602(dist=399426),LOC285889(dist=69972)	5	4.242	T17L8	156156610	156242564
	Cbm_Left_VIIb	rs72754248	9	119061396	9q33.1	A	G	0.0706	T17V9	0.1356	0.012	9.153e-30	intronic	PAPPA	2b	13.23	T17L9	119049958	119093757
	Cbm_Left_VIIb	rs4760401	12	93140809	12q22	A	G	0.6736	T17V10	-0.0406	0.0065	5.554e-10	intronic	PLEKHG7	1f	3.708	T17L10	92969768	93324696
	Cbm_Left_VIIb	rs11111278	12	102846020	12q23.2	A	G	0.7921	T17V11	-0.0565	0.0076	1.015e-13	intronic	IGF1	7	2.401	T17L11	102394872	102943707
	Cbm_Left_VIIb	rs703545	12	102943000	12q23.2	A	G	0.1581	T17V12	-0.0551	0.0085	8.414e-11	intergenic	IGF1(dist=68659),LINC00485(dist=260061)	5	0.186
	Cbm_Left_VIIb	rs696908	13	103618857	13q33.1	C	G	0.3735	T17V13	-0.0507	0.0064	1.374e-15	intergenic	METTL21EP(dist=70474),SLC10A2(dist=77491)	5	0.481
	Cbm_Left_VIIb	rs2699315	13	103940450	13q33.1	A	G	0.1864	T17V14	0.0663	0.0079	5.29e-17	intergenic	SLC10A2(dist=221683),LINC01309(dist=137100)	4	0.768	T17L12	103592244	104755303
	Cbm_Left_VIIb	rs713607	13	104750929	13q33.1	A	G	0.1345	T17V15	0.0706	0.009	3.358e-15	intergenic	LINC01309(dist=670894),DAOA-AS1(dist=1360477)	2b	0.024
	Cbm_Left_VIIb	rs117332043	14	57617154	14q22.3	T	C	0.0681	T17V16	0.1628	0.0122	1.316e-40	intergenic	OTX2-AS1(dist=219128),EXOC5(dist=50071)	5	0.282	T17L13	57482739	57815173
	Cbm_Left_VIIb	rs55906330	14	57668188	14q22.3	A	G	0.1334	T17V17	0.0603	0.0097	4.571e-10	UTR3	EXOC5(NM_006544:c.*7139T>C)	7	0.974
	Cbm_Left_VIIb	rs2693673	14	99735480	14q32.2	T	C	0.591	T17V18	-0.0516	0.0067	8.929e-15	intronic	BCL11B	4	15.92	T17L14	99707933	99751267
	Cbm_Left_VIIb	rs2106974	22	28026477	22q12.1	T	C	0.0423	T17V19	0.093	0.0153	1.273e-09	intergenic	LINC02554(dist=312676),MN1(dist=117788)	4	5.854
	Cbm_Left_VIIb	rs134016	22	28038356	22q12.1	A	G	0.8013	T17V20	0.082	0.0078	7.186e-26	intergenic	LINC02554(dist=324555),MN1(dist=105909)	4	18.99	T17L15	28004494	28039203
	Cbm_Right_VIIb	rs1342131	1	82292250	1p31.1	T	C	0.5727	T18V1	0.038	0.0061	5.258e-10	intronic	ADGRL2	5	18.81	T18L1	82289569	82347005
	Cbm_Right_VIIb	rs17749164	1	231897207	1q42.2	T	C	0.5981	T18V2	0.0521	0.0062	2.621e-17	ncRNA_intronic	TSNAX-DISC1	5	1.784	T18L2	231897207	231900971
	Cbm_Right_VIIb	rs10496403	2	106419622	2q12.2	T	G	0.7309	T18V3	-0.0484	0.0068	1.406e-12	intronic	NCK2	5	9.46	T18L3	106366844	106537741
	Cbm_Right_VIIb	rs6739830	2	208082651	2q33.3	A	G	0.4119	T18V4	-0.0389	0.0062	2.627e-10	ncRNA_intronic	MYOSLID-AS1	1f	0.294	T18L4	208017033	208088987
	Cbm_Right_VIIb	rs2234675	2	223085955	2q36.1	T	G	0.0423	T18V5	-0.0953	0.0149	1.778e-10	exonic (missense variant)	PAX3	5	27.7	T18L5	223046616	223085955
	Cbm_Right_VIIb	rs4865162	4	57767822	4q12	A	G	0.4246	T18V6	0.0461	0.0061	4.038e-14	intergenic	SPINK2(dist=79787),REST(dist=6244)	1f	0.437	T18L6	57714659	57905851
	Cbm_Right_VIIb	rs13107325	4	103188709	4q24	T	C	0.0713	T18V7	0.086	0.0117	2.432e-13	exonic (missense variant)	SLC39A8	6	24.2	T18L7	102926923	103287131
	Cbm_Right_VIIb	rs11946517	4	145599534	4q31.21	C	G	0.5812	T18V8	0.0411	0.0061	1.807e-11	intronic	HHIP	7	11.84	T18L8	145520608	146135402
	Cbm_Right_VIIb	rs835217	5	39359090	5p13.1	A	T	0.6284	T18V9	-0.039	0.0064	1.261e-09	intronic	C9	6	1.945	T18L9	39356000	39421736
	Cbm_Right_VIIb	rs10074318	5	112436568	5q22.2	A	G	0.3212	T18V10	-0.0501	0.0065	1.23e-14	intronic	MCC	1f	1.261	T18L10	112387556	112442272
	Cbm_Right_VIIb	rs7769624	6	148535313	6q24.3	A	C	0.428	T18V11	-0.0422	0.0061	4.856e-12	intergenic	SAMD5(dist=644156),SASH1(dist=58151)	1f	0.679	T18L11	148535313	148538085
	Cbm_Right_VIIb	rs720078	7	103283013	7q22.1	T	C	0.1498	T18V12	0.0591	0.0085	2.8e-12	intronic	RELN	7	1.041	T18L12	103245127	103392761
	Cbm_Right_VIIb	rs995450	7	103331061	7q22.1	A	G	0.3479	T18V13	-0.0384	0.0064	1.586e-09	intronic	RELN	4	7.454
	Cbm_Right_VIIb	rs7804536	7	115032255	7q31.2	T	G	0.7967	T18V14	-0.0466	0.0075	4.724e-10	intergenic	LINC01392(dist=160846),SNORA25B(dist=189114)	7	1.453	T18L13	114945830	115114049
	Cbm_Right_VIIb	rs10447502	7	156072251	7q36.3	T	C	0.2893	T18V15	-0.0447	0.0066	1.658e-11	intergenic	LOC389602(dist=311166),LOC285889(dist=158232)	5	2.878
	Cbm_Right_VIIb	rs36071136	7	156166303	7q36.3	C	G	0.5747	T18V16	-0.0419	0.0061	6.341e-12	intergenic	LOC389602(dist=405218),LOC285889(dist=64180)	4	1.05	T18L14	156067051	156175854
	Cbm_Right_VIIb	rs12386974	8	11400628	8p23.1	C	G	0.5083	T18V17	0.0379	0.006	3.141e-10	intronic	BLK	1f	1.923	T18L15	10835480	11444837
	Cbm_Right_VIIb	rs74441363	9	76371779	9q21.13	T	C	0.0302	T18V18	-0.1186	0.0176	1.461e-11	intergenic	ANXA1(dist=586470),LOC101927358(dist=614668)	7	1.577	T18L16	76232858	76381590
	Cbm_Right_VIIb	rs10867771	9	84167415	9q21.32	A	T	0.3492	T18V19	-0.042	0.0064	4.404e-11	intergenic	LINC01507(dist=1517945),TLE1(dist=31183)	1b	16.52	T18L17	84166882	84178750
	Cbm_Right_VIIb	rs72754248	9	119061396	9q33.1	A	G	0.0706	T18V20	0.0986	0.0118	4.882e-17	intronic	PAPPA	2b	13.23	T18L18	119057741	119443554
	Cbm_Right_VIIb	rs7860925	9	119367184	9q33.1	T	C	0.5373	T18V21	-0.0365	0.006	1.526e-09	intronic	ASTN2	1b	1.712
	Cbm_Right_VIIb	rs11111278	12	102846020	12q23.2	A	G	0.7922	T18V22	-0.0572	0.0075	1.626e-14	intronic	IGF1	7	2.401	T18L19	102394872	102946220
	Cbm_Right_VIIb	rs2162230	13	103626942	13q33.1	C	G	0.3903	T18V23	-0.0479	0.0062	8.571e-15	intergenic	METTL21EP(dist=78559),SLC10A2(dist=69406)	4	20.6
	Cbm_Right_VIIb	rs2699315	13	103940450	13q33.1	A	G	0.1865	T18V24	0.0661	0.0078	1.724e-17	intergenic	SLC10A2(dist=221683),LINC01309(dist=137100)	4	0.768	T18L20	103592244	104755303
	Cbm_Right_VIIb	rs1398585	13	104750687	13q33.1	A	G	0.8652	T18V25	-0.0736	0.0088	9.114e-17	intergenic	LINC01309(dist=670652),DAOA-AS1(dist=1360719)	5	6.549
	Cbm_Right_VIIb	rs117332043	14	57617154	14q22.3	T	C	0.0681	T18V26	0.1857	0.012	3.564e-54	intergenic	OTX2-AS1(dist=219128),EXOC5(dist=50071)	5	0.282	T18L21	57482739	57831950
	Cbm_Right_VIIb	rs79191875	14	57684250	14q22.3	T	C	0.8591	T18V27	-0.0649	0.0086	4.186e-14	intronic	EXOC5	7	9.503
	Cbm_Right_VIIb	rs941521	14	99708876	14q32.2	A	G	0.574	T18V28	0.043	0.0062	2.96e-12	intronic	BCL11B	5	1.329	T18L22	99706474	99751267
	Cbm_Right_VIIb	rs113173628	17	43794899	17q21.31	T	C	0.2096	T18V29	-0.0672	0.0075	2.462e-19	intronic	LINC02210-CRHR1	5	2.353	T18L23	43463493	44865603
	Cbm_Right_VIIb	rs199445	17	44817408	17q21.31	T	C	0.2104	T18V30	-0.0603	0.0074	2.652e-16	intronic	NSF	1f	2.705
	Cbm_Right_VIIb	rs6079584	20	14840502	20p12.1	A	C	0.5777	T18V31	0.0378	0.0061	5.637e-10	intronic	MACROD2	4	6.402	T18L24	14821907	14841737
	Cbm_Right_VIIb	rs84511	22	28039203	22q12.1	T	G	0.7542	T18V32	0.0615	0.0071	5.895e-18	intergenic	LINC02554(dist=325402),MN1(dist=105062)	4	0.275	T18L25	28006526	28039203
	Cbm_Left_VIIIa	rs3790941	1	82315273	1p31.1	A	G	0.6014	T19V1	-0.04	0.0063	1.979e-10	intronic	ADGRL2	4	16.57	T19L1	82254623	82315273
	Cbm_Left_VIIIa	rs2942352	1	212691887	1q32.3	A	G	0.7752	T19V2	0.0484	0.0074	7.894e-11	intergenic	NENF(dist=72166),LINC01740(dist=27149)	1f	4.192	T19L2	212691887	212692030
	Cbm_Left_VIIIa	rs17749164	1	231897207	1q42.2	T	C	0.5981	T19V3	0.0586	0.0063	1.102e-20	ncRNA_intronic	TSNAX-DISC1	5	1.784	T19L3	231883443	231908347
	Cbm_Left_VIIIa	rs2889605	2	106525073	2q12.2	T	C	0.6338	T19V4	-0.0404	0.0064	3.724e-10	intergenic	NCK2(dist=14343),ECRG4(dist=157071)	4	3.116	T19L4	106423876	106537741
	Cbm_Left_VIIIa	rs2234675	2	223085955	2q36.1	T	G	0.0423	T19V5	-0.0959	0.0152	3.088e-10	exonic (missense variant)	PAX3	5	27.7	T19L5	223046616	223085955
	Cbm_Left_VIIIa	rs9830690	3	88727258	3p11.1	T	C	0.3452	T19V6	-0.0403	0.0066	9.827e-10	intergenic	CSNKA2IP(dist=210514),EPHA3(dist=429513)	7	0.39	T19L6	88727258	88784346
	Cbm_Left_VIIIa	rs17218035	4	58930432	4q12	A	G	0.5648	T19V7	0.0378	0.0062	9.685e-10	intergenic	LINC02380(dist=598280),LINC02494(dist=460248)	5	3.674	T19L7	58711301	58932326
	Cbm_Left_VIIIa	rs7769624	6	148535313	6q24.3	A	C	0.428	T19V8	-0.0474	0.0062	3.104e-14	intergenic	SAMD5(dist=644156),SASH1(dist=58151)	1f	0.679	T19L8	148516871	148556084
	Cbm_Left_VIIIa	rs7780464	7	115450015	7q31.2	T	C	0.445	T19V9	0.0402	0.0062	9.534e-11	intergenic	SNORA25B(dist=228520),TFEC(dist=125187)	5	19.18	T19L9	115439157	115452476
	Cbm_Left_VIIIa	rs12698398	7	156111722	7q36.3	C	G	0.7032	T19V10	0.0409	0.0067	1.274e-09	intergenic	LOC389602(dist=350637),LOC285889(dist=118761)	4	2.828	T19L10	156066865	156128006
	Cbm_Left_VIIIa	rs2929451	8	9085295	8p23.1	A	T	0.486	T19V11	-0.041	0.0061	2.564e-11	intergenic	LOC101929128(dist=24929),LOC157273(dist=97266)	1f	1.613	T19L11	8088230	10084394
	Cbm_Left_VIIIa	rs2975731	8	10090864	8p23.1	C	G	0.4527	T19V12	-0.039	0.0062	4.334e-10	intronic	MSRA	6	0.422
	Cbm_Left_VIIIa	rs10102512	8	11534882	8p23.1	A	G	0.7418	T19V13	0.0489	0.0071	4.521e-12	intronic	GATA4	1f	1.733	T19L12	10088486	11809263
	Cbm_Left_VIIIa	rs72754248	9	119061396	9q33.1	A	G	0.0706	T19V14	0.1692	0.012	3.268e-45	intronic	PAPPA	2b	13.23	T19L13	119049958	119093757
	Cbm_Left_VIIIa	rs78640054	10	122841052	10q26.12	A	G	0.0648	T19V15	0.109	0.0125	3.325e-18	intergenic	WDR11(dist=172016),FGFR2(dist=396792)	2b	20.5	T19L14	122841052	123466100
	Cbm_Left_VIIIa	rs72830638	10	123024639	10q26.12	A	T	0.0183	T19V16	0.1575	0.0229	6.406e-12	intergenic	WDR11(dist=355603),FGFR2(dist=213205)	4	1.55
	Cbm_Left_VIIIa	rs11200069	10	123429042	10q26.13	A	G	0.8102	T19V17	-0.0497	0.0079	2.536e-10	intergenic	FGFR2(dist=71070),ATE1(dist=70894)	1f	0.119
	Cbm_Left_VIIIa	rs4752582	10	123443605	10q26.13	A	G	0.9247	T19V18	-0.0948	0.0117	4.857e-16	intergenic	FGFR2(dist=85633),ATE1(dist=56331)	1f	12.79
	Cbm_Left_VIIIa	rs1140711	11	27517409	11p14.1	T	C	0.4414	T19V19	-0.0385	0.0062	6.821e-10	UTR3	LIN7C(NM_018362:c.*2787A>G)	1f	3.885	T19L15	27505677	27620473
	Cbm_Left_VIIIa	rs35872193	12	102442428	12q23.2	A	T	0.7931	T19V20	-0.0537	0.0076	2.203e-12	intronic	WASHC3	6	0.138	T19L16	102399379	102946220
	Cbm_Left_VIIIa	rs9514079	13	103620231	13q33.1	T	C	0.6267	T19V21	0.0574	0.0064	2.055e-19	intergenic	METTL21EP(dist=71848),SLC10A2(dist=76117)	5	0.48
	Cbm_Left_VIIIa	rs1529277	13	103927898	13q33.1	T	C	0.1869	T19V22	0.1118	0.0079	1.181e-45	intergenic	SLC10A2(dist=209131),LINC01309(dist=149652)	5	1.427	T19L17	103581455	104755303
	Cbm_Left_VIIIa	rs713607	13	104750929	13q33.1	A	G	0.1345	T19V23	0.1005	0.009	4.355e-29	intergenic	LINC01309(dist=670894),DAOA-AS1(dist=1360477)	2b	0.024
	Cbm_Left_VIIIa	rs9805964	14	57535645	14q22.3	T	G	0.3525	T19V24	0.0481	0.0066	2.217e-13	intergenic	OTX2-AS1(dist=137619),EXOC5(dist=131580)	2b	1.724
	Cbm_Left_VIIIa	rs117332043	14	57617154	14q22.3	T	C	0.0681	T19V25	0.145	0.0122	1.905e-32	intergenic	OTX2-AS1(dist=219128),EXOC5(dist=50071)	5	0.282	T19L18	57482739	57701290
	Cbm_Left_VIIIa	rs62015152	15	67868976	15q23	A	G	0.0894	T19V26	-0.0921	0.0109	2.604e-17	intronic	MAP2K5	1f	12.81	T19L19	67697563	68143738
	Cbm_Left_VIIIa	rs78777685	17	35257232	17q12	A	G	0.2179	T19V27	0.0725	0.0076	2.459e-21	ncRNA_intronic	LHX1-DT	4	16.19
	Cbm_Left_VIIIa	rs9905515	17	35261073	17q12	C	G	0.223	T19V28	-0.072	0.0074	3.412e-22	ncRNA_intronic	LHX1-DT	5	0.542	T19L20	35243500	35266724
	Cbm_Left_VIIIa	rs2696558	17	44346951	17q21.31	A	T	0.3143	T19V29	-0.0515	0.0068	4.725e-14	intergenic	KANSL1(dist=44211),ARL17B(dist=4599)	1f	0.529	T19L21	43500477	44858838
	Cbm_Left_VIIIa	rs2668779	18	44742066	18q21.1	A	C	0.4738	T19V30	-0.0416	0.0062	1.858e-11	intronic	SKOR2	1d	2.785	T19L22	44601611	44799515
	Cbm_Left_VIIIa	rs134016	22	28038356	22q12.1	A	G	0.8013	T19V31	0.061	0.0078	5.718e-15	intergenic	LINC02554(dist=324555),MN1(dist=105909)	4	18.99	T19L23	28004494	28039203
	Cbm_Right_VIIIa	rs17218035	4	58930432	4q12	A	G	0.5648	T20V1	0.0456	0.0063	3.776e-13	intergenic	LINC02380(dist=598280),LINC02494(dist=460248)	5	3.674	T20L1	58711301	58932662
	Cbm_Right_VIIIa	rs11727676	4	145659064	4q31.21	T	C	0.9052	T20V2	0.0701	0.0106	4.463e-11	exonic (synonymous variant)	HHIP	5	12.31	T20L2	145621328	145659064
	Cbm_Right_VIIIa	rs72831708	6	8730954	6p24.3	T	G	0.0626	T20V3	-0.0871	0.0129	1.342e-11	ncRNA_intronic	LOC100506207	1f	1.107	T20L3	8676452	8782621
	Cbm_Right_VIIIa	rs7769624	6	148535313	6q24.3	A	C	0.428	T20V4	-0.04	0.0063	2.628e-10	intergenic	SAMD5(dist=644156),SASH1(dist=58151)	1f	0.679	T20L4	148535313	148537065
	Cbm_Right_VIIIa	rs62474710	7	115044851	7q31.2	T	C	0.2034	T20V5	0.0487	0.0077	3.119e-10	intergenic	LINC01392(dist=173442),SNORA25B(dist=176518)	7	1.349
	Cbm_Right_VIIIa	rs4607542	7	115442859	7q31.2	T	C	0.4042	T20V6	0.0432	0.0063	8.341e-12	intergenic	SNORA25B(dist=221364),TFEC(dist=132343)	7	6.642	T20L5	114965505	115455527
	Cbm_Right_VIIIa	rs435581	8	9029413	8p23.1	A	G	0.4994	T20V7	0.041	0.0062	4.873e-11	intergenic	PPP1R3B(dist=20364),LOC101929128(dist=17096)	1f	3.439	T20L6	8088230	10009952
	Cbm_Right_VIIIa	rs113536795	8	10088486	8p23.1	C	G	0.3559	T20V8	0.042	0.0066	2.443e-10	intronic	MSRA	7	0.902
	Cbm_Right_VIIIa	rs2736342	8	11347289	8p23.1	T	G	0.4427	T20V9	-0.0443	0.0063	1.511e-12	intergenic	FAM167A(dist=23027),BLK(dist=4607)	1f	5.076	T20L7	10077241	11856583
	Cbm_Right_VIIIa	rs72754248	9	119061396	9q33.1	A	G	0.0706	T20V10	0.1797	0.0122	2.097e-49	intronic	PAPPA	2b	13.23	T20L8	119049958	119093757
	Cbm_Right_VIIIa	rs78640054	10	122841052	10q26.12	A	G	0.0648	T20V11	0.097	0.0127	2.391e-14	intergenic	WDR11(dist=172016),FGFR2(dist=396792)	2b	20.5
	Cbm_Right_VIIIa	rs4752582	10	123443605	10q26.13	A	G	0.9247	T20V12	-0.0923	0.0118	6.545e-15	intergenic	FGFR2(dist=85633),ATE1(dist=56331)	1f	12.79	T20L9	122841052	123466100
	Cbm_Right_VIIIa	rs1140711	11	27517409	11p14.1	T	C	0.4414	T20V13	-0.048	0.0063	3.489e-14	UTR3	LIN7C(NM_018362:c.*2787A>G)	1f	3.885	T20L10	27455582	27749725
	Cbm_Right_VIIIa	rs35872193	12	102442428	12q23.2	A	T	0.7931	T20V14	-0.0536	0.0078	4.829e-12	intronic	WASHC3	6	0.138	T20L11	102399379	102946220
	Cbm_Right_VIIIa	rs9514079	13	103620231	13q33.1	T	C	0.6267	T20V15	0.0431	0.0065	2.443e-11	intergenic	METTL21EP(dist=71848),SLC10A2(dist=76117)	5	0.48
	Cbm_Right_VIIIa	rs1529276	13	103928007	13q33.1	A	T	0.1882	T20V16	0.1003	0.008	2.176e-36	intergenic	SLC10A2(dist=209240),LINC01309(dist=149543)	7	6.218	T20L12	103612968	104755303
	Cbm_Right_VIIIa	rs1398585	13	104750687	13q33.1	A	G	0.8652	T20V17	-0.0864	0.0092	3.591e-21	intergenic	LINC01309(dist=670652),DAOA-AS1(dist=1360719)	5	6.549
	Cbm_Right_VIIIa	rs9805964	14	57535645	14q22.3	T	G	0.3525	T20V18	0.0475	0.0067	9e-13	intergenic	OTX2-AS1(dist=137619),EXOC5(dist=131580)	2b	1.724
	Cbm_Right_VIIIa	rs117332043	14	57617154	14q22.3	T	C	0.0681	T20V19	0.1415	0.0124	3.612e-30	intergenic	OTX2-AS1(dist=219128),EXOC5(dist=50071)	5	0.282	T20L13	57482739	57635386
	Cbm_Right_VIIIa	rs62015152	15	67868976	15q23	A	G	0.0894	T20V20	-0.0838	0.011	3.014e-14	intronic	MAP2K5	1f	12.81	T20L14	67697563	67946796
	Cbm_Right_VIIIa	rs78777685	17	35257232	17q12	A	G	0.2179	T20V21	0.0682	0.0077	1.366e-18	ncRNA_intronic	LHX1-DT	4	16.19
	Cbm_Right_VIIIa	rs9905515	17	35261073	17q12	C	G	0.223	T20V22	-0.0678	0.0075	2.36e-19	ncRNA_intronic	LHX1-DT	5	0.542	T20L15	35243500	35266724
	Cbm_Right_VIIIa	rs2696430	17	44338279	17q21.31	C	G	0.2282	T20V23	-0.0566	0.0076	6.65e-14	intergenic	KANSL1(dist=35539),ARL17B(dist=13271)	1f	7.984	T20L16	43463493	44865603
	Cbm_Right_VIIIa	rs2635046	18	44728429	18q21.1	A	G	0.4989	T20V24	-0.0427	0.0063	9.076e-12	intergenic	IER3IP1(dist=25694),SKOR2(dist=4111)	6	0.366	T20L17	44594220	44799515
	Cbm_Left_VIIIb	rs2297657	1	53746595	1p32.3	A	T	0.6128	T21V1	-0.0492	0.0065	3.149e-14	intronic	LRP8	1f	0.301	T21L1	53656293	53759072
	Cbm_Left_VIIIb	rs939643	2	165387977	2q24.3	T	G	0.4262	T21V2	0.0733	0.0064	8.091e-31	intronic	GRB14	1f	4.074	T21L2	165296890	165438230
	Cbm_Left_VIIIb	rs36094018	4	68011263	4q13.2	A	C	0.5259	T21V3	0.0485	0.0063	1.104e-14	intergenic	MIR1269A(dist=868617),LOC101927237(dist=271760)	7	0.433	T21L3	67912848	68058681
	Cbm_Left_VIIIb	rs72831708	6	8730954	6p24.3	T	G	0.0626	T21V4	-0.2121	0.013	2.789e-60	ncRNA_intronic	LOC100506207	1f	1.107	T21L4	8339029	8792565
	Cbm_Left_VIIIb	rs66941101	6	26530376	6p22.2	T	C	0.1205	T21V5	0.061	0.0096	2.233e-10	intergenic	HCG11(dist=2764),HMGN4(dist=8218)	1f	6.967
	Cbm_Left_VIIIb	rs9393908	6	28190830	6p22.1	A	T	0.152	T21V6	0.0558	0.0087	1.738e-10	intergenic	TOB2P1(dist=4123),ZSCAN9(dist=2223)	1f	3.142	T21L5	26336572	29159629
	Cbm_Left_VIIIb	rs17286505	7	103326246	7q22.1	C	G	0.4847	T21V7	0.0475	0.0063	5.792e-14	intronic	RELN	1f	15.52	T21L6	103229281	103371839
	Cbm_Left_VIIIb	rs10215000	7	156084177	7q36.3	A	G	0.5823	T21V8	0.0449	0.0064	1.705e-12	intergenic	LOC389602(dist=323092),LOC285889(dist=146306)	6	0.686	T21L7	156066865	156128006
	Cbm_Left_VIIIb	rs6993709	8	77671720	8q21.11	T	C	0.8524	T21V9	0.0567	0.0088	1.415e-10	intronic	ZFHX4	1f	18.01	T21L8	77593246	78832128
	Cbm_Left_VIIIb	rs11997784	8	78646058	8q21.12	T	C	0.654	T21V10	0.0412	0.0066	4.774e-10	intergenic	LOC102724874(dist=257491),PKIA(dist=782517)	6	1.917
	Cbm_Left_VIIIb	rs17602898	9	76232858	9q21.13	T	C	0.029	T21V11	-0.2372	0.0188	1.943e-36	intergenic	ANXA1(dist=447549),LOC101927358(dist=753589)	5	21	T21L9	75961343	76655552
	Cbm_Left_VIIIb	rs72754248	9	119061396	9q33.1	A	G	0.0706	T21V12	0.0809	0.0122	3.86e-11	intronic	PAPPA	2b	13.23	T21L10	119061396	119093757
	Cbm_Left_VIIIb	rs35872193	12	102442428	12q23.2	A	T	0.7931	T21V13	-0.0557	0.0078	8.878e-13	intronic	WASHC3	6	0.138	T21L11	102394872	102946220
	Cbm_Left_VIIIb	rs12146713	12	106476805	12q23.3	T	C	0.9044	T21V14	0.0943	0.0106	7.107e-19	intronic	NUAK1	1b	19.59	T21L12	106443251	106510413
	Cbm_Left_VIIIb	rs7989687	13	103909828	13q33.1	C	G	0.1875	T21V15	0.0612	0.008	2.824e-14	intergenic	SLC10A2(dist=191061),LINC01309(dist=167722)	7	0.019	T21L13	103903542	103965206
	Cbm_Left_VIIIb	rs76675841	14	57620783	14q22.3	T	C	0.8515	T21V16	-0.0559	0.0089	3.173e-10	intergenic	OTX2-AS1(dist=222757),EXOC5(dist=46442)	1f	3.281	T21L14	57606103	57635068
	Cbm_Left_VIIIb	rs3784264	15	58250246	15q21.3	T	G	0.5778	T21V17	0.0473	0.0064	1.44e-13	intronic	ALDH1A2	1f	3.034	T21L15	58189012	58377913
	Cbm_Left_VIIIb	rs2668776	18	44750365	18q21.1	T	C	0.5334	T21V18	-0.0384	0.0063	1.007e-09	intronic	SKOR2	6	1.861	T21L16	44690107	44775897
	Cbm_Left_VIIIb	rs6079577	20	14821907	20p12.1	C	G	0.4159	T21V19	0.0548	0.0064	1.063e-17	intronic	MACROD2	7	16.24	T21L17	14696882	14914709
	Cbm_Left_VIIIb	rs134016	22	28038356	22q12.1	A	G	0.8013	T21V20	0.0818	0.008	1.038e-24	intergenic	LINC02554(dist=324555),MN1(dist=105909)	4	18.99	T21L18	28004494	28039203
	Cbm_Left_VIIIb	rs5975473	X	133805760	Xq26.3	A	C	0.2327	T21V21	0.0425	0.0061	3.909e-12	intronic	PLAC1	1f	3.032	T21L19	133748412	133868102
	Cbm_Right_VIIIb	rs17785382	1	53707953	1p32.3	A	G	0.5915	T22V1	-0.0418	0.0062	2.212e-11	ncRNA_intronic	LOC100507564	7	9.898	T22L1	53656676	53751610
	Cbm_Right_VIIIb	rs939643	2	165387977	2q24.3	T	G	0.4262	T22V2	0.0651	0.0062	1.151e-25	intronic	GRB14	1f	4.074	T22L2	165370061	165437736
	Cbm_Right_VIIIb	rs36094018	4	68011263	4q13.2	A	C	0.5259	T22V3	0.0468	0.0061	2.59e-14	intergenic	MIR1269A(dist=868617),LOC101927237(dist=271760)	7	0.433	T22L3	67912848	68058681
	Cbm_Right_VIIIb	rs26413	5	171098125	5q35.1	T	C	0.3026	T22V4	0.0415	0.0068	8.479e-10	intergenic	FGF18(dist=213495),SMIM23(dist=114751)	7	1.174	T22L4	171098125	171102163
	Cbm_Right_VIIIb	rs72831708	6	8730954	6p24.3	T	G	0.0626	T22V5	-0.18	0.0127	9.331e-46	ncRNA_intronic	LOC100506207	1f	1.107	T22L5	8339029	8788205
	Cbm_Right_VIIIb	rs9321065	6	126744087	6q22.32	A	G	0.4556	T22V6	0.0399	0.0061	7.72e-11	intergenic	NONE(dist=NONE),NONE(dist=NONE)	1f	2.113	T22L6	126659043	127080700
	Cbm_Right_VIIIb	rs17286505	7	103326246	7q22.1	C	G	0.4847	T22V7	0.0485	0.0062	4.679e-15	intronic	RELN	1f	15.52	T22L7	103229281	103373071
	Cbm_Right_VIIIb	rs10214998	7	156084150	7q36.3	A	G	0.5822	T22V8	0.0388	0.0062	4.729e-10	intergenic	LOC389602(dist=323065),LOC285889(dist=146333)	7	5.175	T22L8	156066865	156111722
	Cbm_Right_VIIIb	rs6995390	8	77611012	8q21.11	A	T	0.8452	T22V9	0.0564	0.0091	6.168e-10	intronic	ZFHX4	1b	13.21	T22L9	77610042	77695732
	Cbm_Right_VIIIb	rs1914929	8	78651049	8q21.12	A	G	0.346	T22V10	-0.0466	0.0065	5.925e-13	intergenic	LOC102724874(dist=262482),PKIA(dist=777526)	7	1.104	T22L10	78644605	78832128
	Cbm_Right_VIIIb	rs79723413	9	76381590	9q21.13	A	C	0.0295	T22V11	-0.2199	0.0181	6.72e-34	intergenic	ANXA1(dist=596281),LOC101927358(dist=604857)	7	13.16	T22L11	76105267	76655552
	Cbm_Right_VIIIb	rs11111278	12	102846020	12q23.2	A	G	0.7921	T22V12	-0.0464	0.0076	1.006e-09	intronic	IGF1	7	2.401	T22L12	102407432	102905712
	Cbm_Right_VIIIb	rs12146713	12	106476805	12q23.3	T	C	0.9044	T22V13	0.0907	0.0104	2.852e-18	intronic	NUAK1	1b	19.59	T22L13	106443251	106510413
	Cbm_Right_VIIIb	rs3005621	13	103928857	13q33.1	T	G	0.1879	T22V14	0.0572	0.0079	3.337e-13	intergenic	SLC10A2(dist=210090),LINC01309(dist=148693)	4	19.11	T22L14	103903542	103965206
	Cbm_Right_VIIIb	rs12914603	15	58350896	15q21.3	C	G	0.421	T22V15	-0.0433	0.0063	5.55e-12	intronic	ALDH1A2	1f	1.421	T22L15	58201236	58377468
	Cbm_Right_VIIIb	rs62002749	15	61068836	15q22.2	A	G	0.4777	T22V16	-0.0406	0.0062	7.022e-11	intronic	RORA	1f	0.863	T22L16	61039073	61084364
	Cbm_Right_VIIIb	rs6079577	20	14821907	20p12.1	C	G	0.4159	T22V17	0.0604	0.0063	4.976e-22	intronic	MACROD2	7	16.24	T22L17	14696433	14914709
	Cbm_Right_VIIIb	rs134016	22	28038356	22q12.1	A	G	0.8013	T22V18	0.081	0.0078	2.728e-25	intergenic	LINC02554(dist=324555),MN1(dist=105909)	4	18.99	T22L18	28004494	28046516
	Cbm_Right_VIIIb	rs12382607	X	133814634	Xq26.3	A	T	0.7041	T22V19	-0.0444	0.0061	2.437e-13	intronic	PLAC1	5	2.509	T22L19	133748412	133868102
	Cbm_Left_IX	rs309475	1	23214314	1p36.12	A	G	0.4711	T23V1	-0.0407	0.0067	1.066e-09	intronic	EPHB2	7	4.922	T23L1	23209278	23224019
	Cbm_Left_IX	rs1288481	1	53776413	1p32.3	T	C	0.6113	T23V2	-0.0545	0.0068	1.204e-15	intronic	LRP8	1f	4.635
	Cbm_Left_IX	rs1288582	1	53862594	1p32.3	T	C	0.5319	T23V3	0.0628	0.0066	1.348e-21	intergenic	LINC01771(dist=60413),SLC25A3P1(dist=41449)	2b	1.155	T23L2	53729536	53965248
	Cbm_Left_IX	rs12036908	1	53941851	1p32.3	C	G	0.7793	T23V4	-0.0504	0.008	2.672e-10	intergenic	DMRTB1(dist=8691),GLIS1(dist=30055)	1f	4.743
	Cbm_Left_IX	rs10159331	1	82291272	1p31.1	T	C	0.3975	T23V5	0.0504	0.0067	8.414e-14	intronic	ADGRL2	5	0.309	T23L3	82254623	82315273
	Cbm_Left_IX	rs4652222	1	177011400	1q25.2	T	G	0.6156	T23V6	-0.0492	0.0069	8.576e-13	intronic	ASTN1	1f	0.212	T23L4	176952859	177015215
	Cbm_Left_IX	rs17749164	1	231897207	1q42.2	T	C	0.5981	T23V7	0.0878	0.0068	1.135e-38	ncRNA_intronic	TSNAX-DISC1	5	1.784	T23L5	231883443	231908347
	Cbm_Left_IX	rs9287269	1	243954551	1q44	A	G	0.1851	T23V8	0.0569	0.0091	4.812e-10	intronic	AKT3	6	0.357	T23L6	243716654	244011843
	Cbm_Left_IX	rs56857953	2	3800095	2p25.3	T	C	0.1142	T23V9	-0.0668	0.0104	1.12e-10	intronic	DCDC2C	5	15.42	T23L7	3798267	3810612
	Cbm_Left_IX	rs55795022	2	16386265	2p24.3	A	T	0.171	T23V10	-0.0607	0.01	1.201e-09	intergenic	GACAT3(dist=160454),FAM49A(dist=344465)	2b	16.11
	Cbm_Left_IX	rs7588667	2	16441939	2p24.3	A	T	0.9275	T23V11	0.096	0.0128	5.238e-14	intergenic	GACAT3(dist=216128),FAM49A(dist=288791)	2b	1.289	T23L8	16386265	16452280
	Cbm_Left_IX	rs4851720	2	105438986	2q12.1	T	C	0.6891	T23V12	0.0528	0.0076	4.785e-12	ncRNA_intronic	PANTR1	7	5.044	T23L9	105405557	105466651
	Cbm_Left_IX	rs1477516	2	106533298	2q12.2	A	G	0.2813	T23V13	-0.046	0.0073	2.942e-10	intergenic	NCK2(dist=22568),ECRG4(dist=148846)	1f	3.775	T23L10	106525872	106535966
	Cbm_Left_IX	rs2360675	2	208059640	2q33.3	A	C	0.5549	T23V14	0.0434	0.0067	8.128e-11	ncRNA_intronic	MYOSLID-AS1	6	17.16	T23L11	208059640	208082651
	Cbm_Left_IX	rs4974078	3	49009386	3p21.31	T	C	0.4905	T23V15	0.0412	0.0066	4.969e-10	intronic	ARIH2	7	0.919	T23L12	48723302	49334768
	Cbm_Left_IX	rs78446340	3	146969161	3q24	A	G	0.9851	T23V16	-0.1769	0.0274	1.108e-10	intergenic	LINC02010(dist=326156),ZIC4(dist=134674)	7	0.54	T23L13	146866882	147119888
	Cbm_Left_IX	rs56081664	4	55260931	4q12	T	G	0.6971	T23V17	-0.0537	0.0073	1.729e-13	intergenic	LINC02283(dist=38660),LINC02260(dist=208447)	5	2.004	T23L14	55208028	55375961
	Cbm_Left_IX	rs3755879	4	96114385	4q22.3	A	G	0.2977	T23V18	-0.05	0.0073	6.355e-12	intronic	UNC5C	1f	1.24	T23L15	96039141	96119919
	Cbm_Left_IX	rs55818129	5	39425092	5p13.1	T	G	0.8851	T23V19	0.0812	0.0104	7.263e-15	UTR5	DAB2(NM_001244871:c.-30670A>C)	1a	20.7	T23L16	39418421	39437129
	Cbm_Left_IX	rs10080042	5	88205498	5q14.3	T	C	0.4849	T23V20	-0.0451	0.0069	6.071e-11	ncRNA_intronic	MEF2C-AS1	6	1.645	T23L17	88157552	88205498
	Cbm_Left_IX	rs7728270	5	112431323	5q22.2	T	C	0.6779	T23V21	0.0861	0.0071	6.112e-34	intronic	MCC	1f	0.245	T23L18	112236297	112776797
	Cbm_Left_IX	rs10519347	5	112593347	5q22.2	T	C	0.3045	T23V22	-0.0451	0.0072	3.908e-10	intronic	MCC	1f	0.07
	Cbm_Left_IX	rs549854	5	163163848	5q34	T	G	0.7993	T23V23	0.0502	0.0082	1.089e-09	intergenic	MAT2B(dist=217488),LINC02143(dist=711580)	5	18.21	T23L19	163137635	163286086
	Cbm_Left_IX	rs74705888	5	179824473	5q35.3	C	G	0.0947	T23V24	0.0726	0.0113	1.37e-10	intergenic	GFPT2(dist=44137),CNOT6(dist=96906)	1f	0.097	T23L20	179823759	179829001
	Cbm_Left_IX	rs1884284	6	56425900	6p12.1	A	G	0.4164	T23V25	0.0412	0.0067	7.518e-10	intronic	DST	6	6.825	T23L21	56425284	56498173
	Cbm_Left_IX	rs182613	6	99768894	6q16.2	T	C	0.6193	T23V26	-0.0416	0.0068	1.042e-09	intronic	FAXC	1f	3.803
	Cbm_Left_IX	rs522862	6	100139610	6q16.2	A	G	0.1954	T23V27	-0.0676	0.0083	3.827e-16	intergenic	PRDM13(dist=76156),MCHR2(dist=226787)	7	1.244	T23L22	99701622	100277937
	Cbm_Left_IX	rs12540711	7	21761612	7p15.3	T	G	0.4554	T23V28	-0.0602	0.0067	2.677e-19	intronic	DNAH11	5	2.354	T23L23	21756354	21767350
	Cbm_Left_IX	rs631929	7	103357763	7q22.1	A	G	0.4571	T23V29	-0.1257	0.0066	8.497e-80	intronic	RELN	6	2.349	T23L24	103201735	103545552
	Cbm_Left_IX	rs117446694	7	103360222	7q22.1	A	G	0.9386	T23V30	0.1718	0.0137	6.123e-36	intronic	RELN	4	2.505
	Cbm_Left_IX	rs661575	7	103398107	7q22.1	T	C	0.2406	T23V31	0.0575	0.0084	7.014e-12	intronic	RELN	1f	4.918
	Cbm_Left_IX	rs1627052	7	103401985	7q22.1	A	G	0.6232	T23V32	0.1233	0.0069	2.159e-72	intronic	RELN	5	0.582
	Cbm_Left_IX	rs7790872	7	103450273	7q22.1	A	G	0.1227	T23V33	0.0823	0.0101	4.044e-16	intronic	RELN	4	4.78
	Cbm_Left_IX	rs9641536	7	114979967	7q31.2	A	T	0.4892	T23V34	-0.0445	0.0066	1.939e-11	intergenic	LINC01392(dist=108558),SNORA25B(dist=241402)	7	3.587
	Cbm_Left_IX	rs56746894	7	115445450	7q31.2	A	G	0.5539	T23V35	0.0604	0.0067	1.671e-19	intergenic	SNORA25B(dist=223955),TFEC(dist=129752)	4	0.202	T23L25	114936050	115511488
	Cbm_Left_IX	rs375487249	8	68812200	8q13.2	T	C	0.1278	T23V36	-0.0611	0.0099	7.455e-10	intergenic	CPA6(dist=153605),PREX2(dist=52081)	5	0.108
	Cbm_Left_IX	rs10156241	8	68863901	8q13.2	A	C	0.4049	T23V37	0.0518	0.0067	1.077e-14	upstream	PREX2(dist=380)	1a	15.1	T23L26	68798806	68909116
	Cbm_Left_IX	rs11787532	8	77629786	8q21.11	C	G	0.1471	T23V38	-0.0649	0.0093	3.46e-12	intronic	ZFHX4	1f	3.109
	Cbm_Left_IX	rs12674519	8	78019019	8q21.11	A	G	0.3106	T23V39	-0.0536	0.0072	7.832e-14	intergenic	PEX2(dist=105739),LOC102724874(dist=343914)	7	9.222	T23L27	77588716	78633267
	Cbm_Left_IX	rs6470269	8	125764361	8q24.13	A	G	0.3268	T23V40	0.0441	0.0071	5.684e-10	intergenic	MTSS1(dist=23613),MIR4662B(dist=69859)	1a	6.061	T23L28	125764361	125764361
	Cbm_Left_IX	rs17602898	9	76232858	9q21.13	T	C	0.029	T23V41	-0.1734	0.0198	2.156e-18	intergenic	ANXA1(dist=447549),LOC101927358(dist=753589)	5	21	T23L29	76232858	76443955
	Cbm_Left_IX	rs10867771	9	84167415	9q21.32	A	T	0.3492	T23V42	-0.0699	0.007	1.377e-23	intergenic	LINC01507(dist=1517945),TLE1(dist=31183)	1b	16.52	T23L30	84129775	84197072
	Cbm_Left_IX	rs75049376	10	23484966	10p12.2	A	G	0.899	T23V43	0.073	0.011	3.463e-11	intergenic	PTF1A(dist=1792),C10orf67(dist=5879)	4	20.6	T23L31	23477062	23484966
	Cbm_Left_IX	rs10829556	10	130842249	10q26.3	A	G	0.7404	T23V44	-0.0671	0.0077	4.483e-18	intergenic	LINC02667(dist=127715),MGMT(dist=423256)	4	19.94	T23L32	130835249	130842249
	Cbm_Left_IX	rs7950670	11	58943599	11q12.1	A	G	0.6904	T23V45	0.0479	0.0072	2.258e-11	intronic	DTX4	1f	0.233	T23L33	58932389	58944104
	Cbm_Left_IX	rs7107785	11	95747337	11q21	T	C	0.494	T23V46	-0.0797	0.0066	1.954e-33	intronic	MAML2	1f	2.603	T23L34	95727628	95762272
	Cbm_Left_IX	rs12306127	12	130332478	12q24.33	A	G	0.2491	T23V47	0.0556	0.0076	3.512e-13	intronic	TMEM132D	4	0.625	T23L35	130320249	130345473
	Cbm_Left_IX	rs2807636	13	58220595	13q21.1	A	C	0.8446	T23V48	0.0567	0.0092	5.827e-10	intronic	PCDH17	7	1.53	T23L36	58214745	58245678
	Cbm_Left_IX	rs17577153	13	100390236	13q32.3	A	G	0.9324	T23V49	0.1282	0.0131	1.786e-22	intronic	CLYBL	5	19.91	T23L37	100271221	100394117
	Cbm_Left_IX	rs12895174	14	57590630	14q22.3	A	G	0.7014	T23V50	0.0465	0.0073	1.797e-10	intergenic	OTX2-AS1(dist=192604),EXOC5(dist=76595)	7	0.95	T23L38	57531995	57594878
	Cbm_Left_IX	rs8039985	15	62019289	15q22.2	C	G	0.8636	T23V51	-0.0587	0.0097	1.22e-09	intergenic	RORA(dist=497788),LINC02349(dist=2828)	1f	2.166	T23L39	61988299	62076552
	Cbm_Left_IX	rs62029094	16	49393602	16q12.1	A	G	0.1148	T23V52	0.1544	0.0104	5.113e-50	intergenic	CBLN1(dist=77853),C16orf78(dist=14113)	4	0.015	T23L40	49307145	49502082
	Cbm_Left_IX	rs2052287	16	52502168	16q12.1	C	G	0.4579	T23V53	-0.0424	0.0066	1.399e-10	intronic	TOX3	1f	0.859	T23L41	52490681	52510706
	Cbm_Left_IX	rs72801201	16	85686648	16q24.1	A	C	0.7522	T23V54	0.0553	0.0077	8.249e-13	intronic	GSE1	1f	4.115	T23L42	85670377	85720945
	Cbm_Left_IX	rs12600420	17	35048367	17q12	T	C	0.5997	T23V55	0.0477	0.0067	1.406e-12	intergenic	MRM1(dist=82967),LHX1-DT(dist=170568)	5	21
	Cbm_Left_IX	rs77029858	17	35184825	17q12	A	C	0.9062	T23V56	0.0829	0.0113	2.222e-13	intergenic	MRM1(dist=219425),LHX1-DT(dist=34110)	4	0.355
	Cbm_Left_IX	rs12451316	17	35188930	17q12	T	C	0.4091	T23V57	0.043	0.0068	2.269e-10	intergenic	MRM1(dist=223530),LHX1-DT(dist=30005)	1f	1.277
	Cbm_Left_IX	rs62071082	17	35208646	17q12	A	G	0.7807	T23V58	-0.0589	0.0096	7.242e-10	intergenic	MRM1(dist=243246),LHX1-DT(dist=10289)	2a	4.414
	Cbm_Left_IX	rs9330243	17	35208813	17q12	T	G	0.2869	T23V59	-0.0577	0.0089	8.888e-11	intergenic	MRM1(dist=243413),LHX1-DT(dist=10122)	4	2.076
	Cbm_Left_IX	rs72824417	17	35238993	17q12	T	C	0.2054	T23V60	0.0794	0.0083	7.313e-22	ncRNA_intronic	LHX1-DT	5	8.332
	Cbm_Left_IX	rs187306171	17	35244024	17q12	T	C	0.0161	T23V61	-0.1973	0.0264	8.187e-14	ncRNA_intronic	LHX1-DT	5	1.111
	Cbm_Left_IX	rs7223375	17	35246013	17q12	C	G	0.3574	T23V62	0.0914	0.007	2.807e-39	ncRNA_intronic	LHX1-DT	2b	15.77
	Cbm_Left_IX	rs7219502	17	35246156	17q12	T	C	0.0257	T23V63	0.2367	0.0208	5.072e-30	ncRNA_intronic	LHX1-DT	2b	0.922
	Cbm_Left_IX	rs140320084	17	35255520	17q12	T	C	0.0122	T23V64	-0.2077	0.0306	1.189e-11	ncRNA_intronic	LHX1-DT	5	3.278
	Cbm_Left_IX	rs77515140	17	35257237	17q12	A	G	0.2181	T23V65	-0.2056	0.0082	1.11e-138	ncRNA_intronic	LHX1-DT	4	13.82	T23L43	35042960	35282499
	Cbm_Left_IX	rs9905515	17	35261073	17q12	C	G	0.223	T23V66	0.1729	0.008	3.46e-104	ncRNA_intronic	LHX1-DT	5	0.542
	Cbm_Left_IX	rs79617415	17	35276344	17q12	A	G	0.0291	T23V67	-0.1233	0.0197	3.941e-10	ncRNA_intronic	LHX1-DT	1f	8.796
	Cbm_Left_IX	rs77069497	17	35278608	17q12	A	G	0.0329	T23V68	0.2312	0.0187	5.518e-35	ncRNA_intronic	LHX1-DT	1f	14.71
	Cbm_Left_IX	rs150429808	17	35282499	17q12	C	G	0.9834	T23V69	0.2338	0.0261	3.174e-19	ncRNA_intronic	LHX1-DT	6	1.859
	Cbm_Left_IX	rs2668776	18	44750365	18q21.1	T	C	0.5334	T23V70	-0.0479	0.0066	4.848e-13	intronic	SKOR2	6	1.861	T23L44	44573476	44793532
	Cbm_Left_IX	rs1569998	20	14485772	20p12.1	A	C	0.7904	T23V71	0.0499	0.0081	8.966e-10	intronic	MACROD2	7	7.722
	Cbm_Left_IX	rs6135281	20	14833762	20p12.1	A	C	0.4248	T23V72	-0.0734	0.0067	4.526e-28	intronic	MACROD2	4	0.188	T23L45	14466997	14914709
	Cbm_Left_IX	rs10460679	21	41977675	21q22.2	T	C	0.4265	T23V73	0.0597	0.0067	4.187e-19	intronic	DSCAM	5	1.056	T23L46	41918958	41991737
	Cbm_Left_IX	rs2042054	X	10337420	Xp22.2	T	C	0.663	T23V74	-0.0532	0.0058	4.704e-20	intergenic	CLCN4(dist=131721),MID1(dist=75930)	1f	1.591	T23L47	10182812	10360117
	Cbm_Right_IX	rs309475	1	23214314	1p36.12	A	G	0.4711	T24V1	-0.0425	0.0067	1.952e-10	intronic	EPHB2	7	4.922	T24L1	23209278	23224019
	Cbm_Right_IX	rs140842248	1	51693337	1p32.3	A	G	0.0479	T24V2	0.0997	0.0155	1.114e-10	ncRNA_intronic	LINC01562	1f	13.5	T24L2	51549253	51779358
	Cbm_Right_IX	rs1288481	1	53776413	1p32.3	T	C	0.6113	T24V3	-0.0476	0.0068	2.919e-12	intronic	LRP8	1f	4.635
	Cbm_Right_IX	rs1288582	1	53862594	1p32.3	T	C	0.5319	T24V4	0.0583	0.0066	8.666e-19	intergenic	LINC01771(dist=60413),SLC25A3P1(dist=41449)	2b	1.155	T24L3	53757677	53965248
	Cbm_Right_IX	rs12036908	1	53941851	1p32.3	C	G	0.7793	T24V5	-0.0497	0.008	4.813e-10	intergenic	DMRTB1(dist=8691),GLIS1(dist=30055)	1f	4.743
	Cbm_Right_IX	rs10159331	1	82291272	1p31.1	T	C	0.3975	T24V6	0.0503	0.0067	8.749e-14	intronic	ADGRL2	5	0.309	T24L4	82254623	82347005
	Cbm_Right_IX	rs7540842	1	176991436	1q25.2	T	G	0.3871	T24V7	0.0606	0.0074	1.913e-16	intronic	ASTN1	5	0.03	T24L5	176952859	177015215
	Cbm_Right_IX	rs17749164	1	231897207	1q42.2	T	C	0.5981	T24V8	0.0876	0.0068	1.914e-38	ncRNA_intronic	TSNAX-DISC1	5	1.784	T24L6	231883443	231908347
	Cbm_Right_IX	rs10803162	1	244003446	1q44	T	C	0.1834	T24V9	0.0566	0.0086	3.562e-11	intronic	AKT3	5	2.892	T24L7	243710190	244011843
	Cbm_Right_IX	rs56857953	2	3800095	2p25.3	T	C	0.1142	T24V10	-0.0677	0.0104	6.519e-11	intronic	DCDC2C	5	15.42	T24L8	3798267	3810612
	Cbm_Right_IX	rs7588667	2	16441939	2p24.3	A	T	0.9275	T24V11	0.0856	0.0128	1.93e-11	intergenic	GACAT3(dist=216128),FAM49A(dist=288791)	2b	1.289	T24L9	16420389	16445091
	Cbm_Right_IX	rs1477516	2	106533298	2q12.2	A	G	0.2813	T24V12	-0.0469	0.0073	1.33e-10	intergenic	NCK2(dist=22568),ECRG4(dist=148846)	1f	3.775	T24L10	106523877	106535966
	Cbm_Right_IX	rs12474257	2	179127972	2q31.2	A	G	0.4279	T24V13	-0.0436	0.0067	6.679e-11	intronic	OSBPL6	1f	2.281	T24L11	179101921	179182695
	Cbm_Right_IX	rs56081664	4	55260931	4q12	T	G	0.6971	T24V14	-0.0534	0.0073	2.272e-13	intergenic	LINC02283(dist=38660),LINC02260(dist=208447)	5	2.004	T24L12	55208028	55387660
	Cbm_Right_IX	rs3755879	4	96114385	4q22.3	A	G	0.2977	T24V15	-0.0495	0.0073	1.101e-11	intronic	UNC5C	1f	1.24	T24L13	96039141	96119796
	Cbm_Right_IX	rs55818129	5	39425092	5p13.1	T	G	0.8851	T24V16	0.084	0.0104	8.086e-16	UTR5	DAB2(NM_001244871:c.-30670A>C)	1a	20.7	T24L14	39400587	39437129
	Cbm_Right_IX	rs770463	5	88194950	5q14.3	T	C	0.5147	T24V17	0.0439	0.0067	5.814e-11	ncRNA_intronic	MEF2C-AS1	1f	5.909	T24L15	88157552	88205498
	Cbm_Right_IX	rs374613	5	112192072	5q22.2	A	G	0.4559	T24V18	-0.0408	0.0066	7.715e-10	intergenic	APC(dist=10136),SRP19(dist=4813)	1f	2.335
	Cbm_Right_IX	rs7728270	5	112431323	5q22.2	T	C	0.6779	T24V19	0.0835	0.0071	4.81e-32	intronic	MCC	1f	0.245	T24L16	111997237	112776797
	Cbm_Right_IX	rs10519347	5	112593347	5q22.2	T	C	0.3045	T24V20	-0.0456	0.0072	2.549e-10	intronic	MCC	1f	0.07
	Cbm_Right_IX	rs3133038	5	163207984	5q34	T	C	0.2007	T24V21	-0.0498	0.0082	1.532e-09	intergenic	MAT2B(dist=261624),LINC02143(dist=667444)	5	1.367	T24L17	163139605	163286086
	Cbm_Right_IX	rs74705888	5	179824473	5q35.3	C	G	0.0947	T24V22	0.0695	0.0113	8.159e-10	intergenic	GFPT2(dist=44137),CNOT6(dist=96906)	1f	0.097	T24L18	179823759	179829001
	Cbm_Right_IX	rs182613	6	99768894	6q16.2	T	C	0.6193	T24V23	-0.0429	0.0068	3.029e-10	intronic	FAXC	1f	3.803
	Cbm_Right_IX	rs477323	6	100121117	6q16.2	T	G	0.1964	T24V24	-0.0717	0.0083	5.088e-18	intergenic	PRDM13(dist=57663),MCHR2(dist=245280)	7	0.037	T24L19	99701622	100283110
	Cbm_Right_IX	rs7784931	7	12829631	7p21.3	A	G	0.3593	T24V25	0.0461	0.0069	3.078e-11	intergenic	ARL4A(dist=99048),ETV1(dist=1101225)	5	1.655	T24L20	12829631	12923556
	Cbm_Right_IX	rs12540711	7	21761612	7p15.3	T	G	0.4554	T24V26	-0.0552	0.0067	1.7e-16	intronic	DNAH11	5	2.354	T24L21	21756354	21767350
	Cbm_Right_IX	rs117446694	7	103360222	7q22.1	A	G	0.9387	T24V27	0.1587	0.0137	6.787e-31	intronic	RELN	4	2.505
	Cbm_Right_IX	rs517761	7	103369018	7q22.1	T	C	0.4547	T24V28	-0.1131	0.0066	2.692e-65	intronic	RELN	1d	0.473	T24L22	103201735	103545552
	Cbm_Right_IX	rs1627052	7	103401985	7q22.1	A	G	0.6232	T24V29	0.1141	0.0069	3.014e-62	intronic	RELN	5	0.582
	Cbm_Right_IX	rs7790872	7	103450273	7q22.1	A	G	0.1227	T24V30	0.078	0.0101	1.296e-14	intronic	RELN	4	4.78
	Cbm_Right_IX	rs3898843	7	103541961	7q22.1	A	T	0.2819	T24V31	0.0467	0.0073	1.938e-10	intronic	RELN	1f	1.682
	Cbm_Right_IX	rs74426921	7	113699079	7q31.1	T	C	0.3809	T24V32	0.0416	0.0068	1.196e-09	intergenic	PPP1R3A(dist=140015),NONE(dist=NONE)	7	4.258	T24L23	113565559	113709929
	Cbm_Right_IX	rs4730674	7	114949773	7q31.2	C	G	0.4891	T24V33	0.0418	0.0067	4.307e-10	intergenic	LINC01392(dist=78364),SNORA25B(dist=271596)	6	0.349
	Cbm_Right_IX	rs56746894	7	115445450	7q31.2	A	G	0.554	T24V34	0.0527	0.0067	3.089e-15	intergenic	SNORA25B(dist=223955),TFEC(dist=129752)	4	0.202	T24L24	114940147	115511488
	Cbm_Right_IX	rs10099223	8	68856400	8q13.2	A	G	0.7592	T24V35	0.0593	0.0077	1.769e-14	intergenic	CPA6(dist=197805),PREX2(dist=7881)	7	5.832	T24L25	68800364	68909610
	Cbm_Right_IX	rs7007731	8	77695732	8q21.11	T	C	0.1448	T24V36	-0.0668	0.0095	1.548e-12	intronic	ZFHX4	6	3.157	T24L26	77588716	78821886
	Cbm_Right_IX	rs68096255	8	78105010	8q21.11	A	G	0.1143	T24V37	-0.0723	0.0104	3.164e-12	intergenic	PEX2(dist=191730),LOC102724874(dist=257923)	1f	5.228
	Cbm_Right_IX	rs17602898	9	76232858	9q21.13	T	C	0.029	T24V38	-0.1801	0.0198	1.049e-19	intergenic	ANXA1(dist=447549),LOC101927358(dist=753589)	5	21	T24L27	76232858	76443955
	Cbm_Right_IX	rs10867772	9	84172144	9q21.32	A	T	0.3497	T24V39	-0.0658	0.0069	2.638e-21	intergenic	LINC01507(dist=1522674),TLE1(dist=26454)	1f	18.86	T24L28	84160504	84196515
	Cbm_Right_IX	rs11139809	9	85439820	9q21.32	A	C	0.6742	T24V40	-0.046	0.0071	9.085e-11	intergenic	SPATA31D1(dist=829652),RASEF(dist=154685)	7	5.032	T24L29	85431439	85439820
	Cbm_Right_IX	rs75049376	10	23484966	10p12.2	A	G	0.899	T24V41	0.0799	0.011	4.124e-13	intergenic	PTF1A(dist=1792),C10orf67(dist=5879)	4	20.6	T24L30	23453093	23486297
	Cbm_Right_IX	rs10829556	10	130842249	10q26.3	A	G	0.7404	T24V42	-0.0625	0.0077	6.859e-16	intergenic	LINC02667(dist=127715),MGMT(dist=423256)	4	19.94	T24L31	130842249	130842249
	Cbm_Right_IX	rs7945964	11	19771433	11p15.1	A	G	0.4853	T24V43	-0.0402	0.0066	1.206e-09	intronic	NAV2	1f	15.67	T24L32	19762125	19778948
	Cbm_Right_IX	rs7950670	11	58943599	11q12.1	A	G	0.6904	T24V44	0.0478	0.0072	2.511e-11	intronic	DTX4	1f	0.233	T24L33	58942848	58944104
	Cbm_Right_IX	rs7107785	11	95747337	11q21	T	C	0.494	T24V45	-0.077	0.0066	2.238e-31	intronic	MAML2	1f	2.603	T24L34	95727628	95762272
	Cbm_Right_IX	rs35872193	12	102442428	12q23.2	A	T	0.7931	T24V46	-0.05	0.0082	1.109e-09	intronic	WASHC3	6	0.138	T24L35	102407432	102863979
	Cbm_Right_IX	rs12306127	12	130332478	12q24.33	A	G	0.2491	T24V47	0.0591	0.0076	1.092e-14	intronic	TMEM132D	4	0.625	T24L36	130320249	130345473
	Cbm_Right_IX	rs2807636	13	58220595	13q21.1	A	C	0.8446	T24V48	0.0576	0.0092	3.099e-10	intronic	PCDH17	7	1.53	T24L37	58214745	58245678
	Cbm_Right_IX	rs17577153	13	100390236	13q32.3	A	G	0.9324	T24V49	0.1202	0.0132	6.122e-20	intronic	CLYBL	5	19.91	T24L38	100271221	100394117
	Cbm_Right_IX	rs12895141	14	57590541	14q22.3	T	C	0.2983	T24V50	-0.0535	0.0073	2.317e-13	intergenic	OTX2-AS1(dist=192515),EXOC5(dist=76684)	7	0.978	T24L39	57524955	57634263
	Cbm_Right_IX	rs76025319	14	57606103	14q22.3	T	C	0.9251	T24V51	-0.0877	0.0126	2.829e-12	intergenic	OTX2-AS1(dist=208077),EXOC5(dist=61122)	4	3.028
	Cbm_Right_IX	rs62029094	16	49393602	16q12.1	A	G	0.1148	T24V52	0.15	0.0104	2.8e-47	intergenic	CBLN1(dist=77853),C16orf78(dist=14113)	4	0.015	T24L40	49307145	49491235
	Cbm_Right_IX	rs732461	16	85678747	16q24.1	T	C	0.2469	T24V53	-0.0472	0.0077	9.434e-10	intronic	GSE1	1f	1.39	T24L41	85670936	85690338
	Cbm_Right_IX	rs12600420	17	35048367	17q12	T	C	0.5997	T24V54	0.0436	0.0067	9.779e-11	intergenic	MRM1(dist=82967),LHX1-DT(dist=170568)	5	21
	Cbm_Right_IX	rs77029858	17	35184825	17q12	A	C	0.9062	T24V55	0.0707	0.0113	4.163e-10	intergenic	MRM1(dist=219425),LHX1-DT(dist=34110)	4	0.355
	Cbm_Right_IX	rs72824417	17	35238993	17q12	T	C	0.2054	T24V56	0.0693	0.0083	5.098e-17	ncRNA_intronic	LHX1-DT	5	8.332
	Cbm_Right_IX	rs187306171	17	35244024	17q12	T	C	0.0161	T24V57	-0.1766	0.0264	2.345e-11	ncRNA_intronic	LHX1-DT	5	1.111
	Cbm_Right_IX	rs7223375	17	35246013	17q12	C	G	0.3574	T24V58	0.0792	0.007	6.663e-30	ncRNA_intronic	LHX1-DT	2b	15.77
	Cbm_Right_IX	rs7219502	17	35246156	17q12	T	C	0.0257	T24V59	0.2086	0.0208	1.09e-23	ncRNA_intronic	LHX1-DT	2b	0.922
	Cbm_Right_IX	rs77515140	17	35257237	17q12	A	G	0.2181	T24V60	-0.182	0.0082	5.16e-109	ncRNA_intronic	LHX1-DT	4	13.82	T24L42	35042960	35282499
	Cbm_Right_IX	rs8064679	17	35259093	17q12	T	G	0.2218	T24V61	0.155	0.008	1.398e-84	ncRNA_intronic	LHX1-DT	2b	14.16
	Cbm_Right_IX	rs77069497	17	35278608	17q12	A	G	0.0329	T24V62	0.2014	0.0187	5.94e-27	ncRNA_intronic	LHX1-DT	1f	14.71
	Cbm_Right_IX	rs150429808	17	35282499	17q12	C	G	0.9834	T24V63	0.2016	0.0261	1.122e-14	ncRNA_intronic	LHX1-DT	6	1.859
	Cbm_Right_IX	rs2668776	18	44750365	18q21.1	T	C	0.5334	T24V64	-0.048	0.0066	4.378e-13	intronic	SKOR2	6	1.861	T24L43	44573476	44793532
	Cbm_Right_IX	rs1569998	20	14485772	20p12.1	A	C	0.7904	T24V65	0.0577	0.0081	1.409e-12	intronic	MACROD2	7	7.722
	Cbm_Right_IX	rs12624529	20	14647810	20p12.1	A	G	0.7949	T24V66	-0.0514	0.0083	5.056e-10	intronic	MACROD2	4	12.44
	Cbm_Right_IX	rs6135236	20	14710482	20p12.1	A	G	0.8776	T24V67	-0.0657	0.0101	7.554e-11	intronic	MACROD2	4	1.175
	Cbm_Right_IX	rs6135281	20	14833762	20p12.1	A	C	0.4249	T24V68	-0.089	0.0067	2.177e-40	intronic	MACROD2	4	0.188	T24L44	14466997	14926587
	Cbm_Right_IX	rs10460679	21	41977675	21q22.2	T	C	0.4265	T24V69	0.0561	0.0067	4.995e-17	intronic	DSCAM	5	1.056	T24L45	41918958	41991737
	Cbm_Right_IX	rs56925044	X	10314670	Xp22.2	A	G	0.2655	T24V70	0.0526	0.0062	1.874e-17	intergenic	CLCN4(dist=108971),MID1(dist=98680)	7	6.489	T24L46	10182812	10363600
	Cbm_Left_X	rs16858712	1	167170270	1q24.1	A	G	0.9192	T25V1	0.0961	0.0119	8.951e-16	intergenic	LINC01363(dist=5228),POU2F1(dist=19852)	5	6.888	T25L1	167164887	167272512
	Cbm_Left_X	rs12714370	2	3078574	2p25.3	T	G	0.3323	T25V2	-0.0531	0.0069	2.035e-14	ncRNA_intronic	LINC01250	5	4.607	T25L2	3058347	3099075
	Cbm_Left_X	rs13008088	2	46781580	2p21	C	G	0.6829	T25V3	-0.0438	0.0071	5.389e-10	intronic	RHOQ	1f	9.172	T25L3	46777208	46850150
	Cbm_Left_X	rs633128	2	50477156	2p16.3	T	G	0.5879	T25V4	-0.0577	0.0066	3.75e-18	intronic	NRXN1	5	2.59	T25L4	50308645	50511655
	Cbm_Left_X	rs4662351	2	144559694	2q22.3	T	G	0.477	T25V5	0.0446	0.0066	1.819e-11	intergenic	ARHGAP15(dist=33773),LOC101928386(dist=134940)	5	6.703	T25L5	144535165	144587692
	Cbm_Left_X	rs534865463	3	18972823	3p24.3	C	G	0.1687	T25V6	-0.0748	0.0088	2.014e-17	intergenic	SATB1-AS1(dist=401217),KCNH8(dist=217179)	6	0.946	T25L6	18939227	19028854
	Cbm_Left_X	rs2172442	4	4762383	4p16.2	C	G	0.6799	T25V7	0.0729	0.007	3.232e-25	intergenic	STX18-AS1(dist=49719),LOC101928279(dist=1104)	4	0.005	T25L7	4753207	4782575
	Cbm_Left_X	rs1291602	5	130766662	5q31.1	T	C	0.1606	T25V8	-0.0816	0.0089	3.657e-20	exonic (missense variant)	RAPGEF6	1f	23.4	T25L8	130162684	131538260
	Cbm_Left_X	rs75826043	6	8538321	6p24.3	A	T	0.2251	T25V9	-0.0495	0.0079	3.451e-10	ncRNA_intronic	LOC100506207	1f	2.166
	Cbm_Left_X	rs11243266	6	8658945	6p24.3	A	G	0.1847	T25V10	0.0844	0.0084	1.578e-23	ncRNA_intronic	LOC100506207	1f	2.874
	Cbm_Left_X	rs28572384	6	9176661	6p24.3	A	G	0.2234	T25V11	-0.0784	0.0078	7.846e-24	intergenic	LOC100506207(dist=390983),TFAP2A(dist=1220249)	7	2.879	T25L9	8353662	9182503
	Cbm_Left_X	rs2031205	6	131709941	6q23.2	T	C	0.1162	T25V12	-0.077	0.0102	5.176e-14	intergenic	AKAP7(dist=105269),ARG1(dist=184425)	1f	1.939	T25L10	131707824	131720813
	Cbm_Left_X	rs62474744	7	115105024	7q31.2	T	C	0.7966	T25V13	0.0598	0.0081	1.989e-13	intergenic	LINC01392(dist=233615),SNORA25B(dist=116345)	6	0.785	T25L11	114960443	115117353
	Cbm_Left_X	rs7861718	9	3924447	9p24.2	A	C	0.6972	T25V14	-0.0446	0.0072	6.894e-10	intronic	GLIS3	4	13.34	T25L12	3924447	3937351
	Cbm_Left_X	rs2991262	9	20618516	9p21.3	A	G	0.2562	T25V15	-0.0564	0.0076	8.116e-14	intronic	MLLT3	4	19.11	T25L13	20606428	20621574
	Cbm_Left_X	rs2777763	9	84180633	9q21.32	A	T	0.624	T25V16	-0.0799	0.0068	1.137e-31	intergenic	LINC01507(dist=1531163),TLE1(dist=17965)	3a	9.378	T25L14	84166882	84210209
	Cbm_Left_X	rs1360505	9	84186907	9q21.32	T	C	0.3201	T25V17	-0.0432	0.007	8.806e-10	intergenic	LINC01507(dist=1537437),TLE1(dist=11691)	7	1.327
	Cbm_Left_X	rs10759832	9	118930313	9q33.1	T	C	0.6118	T25V18	-0.0407	0.0067	1.406e-09	intronic	PAPPA	5	2.814
	Cbm_Left_X	rs10983311	9	119470373	9q33.1	A	T	0.2192	T25V19	-0.0495	0.0079	3.72e-10	intronic	ASTN2	1f	10.36	T25L15	118918479	119479868
	Cbm_Left_X	rs1886763	10	23482363	10p12.2	A	G	0.5327	T25V20	0.0434	0.0065	3.324e-11	intronic	PTF1A	1f	9.588	T25L16	23466734	23588939
	Cbm_Left_X	rs11597095	10	133752612	10q26.3	T	C	0.4892	T25V21	-0.0421	0.0065	1.135e-10	intronic	PPP2R2D	2a	0.988	T25L17	133751657	133804067
	Cbm_Left_X	rs2852862	11	92465067	11q14.3	A	G	0.828	T25V22	0.0552	0.0087	1.776e-10	intronic	FAT3	5	2.836	T25L18	92317747	92552775
	Cbm_Left_X	rs11111278	12	102846020	12q23.2	A	G	0.7921	T25V23	-0.0695	0.0081	8.432e-18	intronic	IGF1	7	2.401	T25L19	102394872	102942969
	Cbm_Left_X	rs2324287	13	63963215	13q21.31	A	G	0.5515	T25V24	0.0473	0.0066	6.369e-13	intergenic	LINC00376(dist=60988),LINC00395(dist=278600)	1f	2.991	T25L20	63945230	63971126
	Cbm_Left_X	rs12587452	14	64299055	14q23.2	T	C	0.3608	T25V25	0.0597	0.0068	1.892e-18	intergenic	SGPP1(dist=104272),SYNE2(dist=20628)	1f	1.849	T25L21	64240957	64449723
	Cbm_Left_X	rs1437760	15	97006323	15q26.2	T	G	0.4388	T25V26	0.0574	0.0066	3.023e-18	intergenic	NR2F2(dist=122831),SPATA8-AS1(dist=308912)	2b	11.67	T25L22	96981322	97043663
	Cbm_Right_X	rs59164061	1	167165647	1q24.1	A	G	0.0791	T26V1	-0.0916	0.012	2.417e-14	upstream	LINC01363(dist=605)	4	20.6	T26L1	167164887	167272512
	Cbm_Right_X	rs12714370	2	3078574	2p25.3	T	G	0.3323	T26V2	-0.0575	0.0069	8.283e-17	ncRNA_intronic	LINC01250	5	4.607	T26L2	3058026	3099075
	Cbm_Right_X	rs13008088	2	46781580	2p21	C	G	0.6829	T26V3	-0.0515	0.007	1.938e-13	intronic	RHOQ	1f	9.172	T26L3	46712538	47006210
	Cbm_Right_X	rs12713094	2	50480355	2p16.3	A	T	0.5888	T26V4	-0.0634	0.0066	7.169e-22	intronic	NRXN1	7	6.706	T26L4	50284911	50519278
	Cbm_Right_X	rs35603314	2	59293596	2p16.1	A	C	0.3549	T26V5	0.0447	0.0068	5.354e-11	intergenic	LINC01122(dist=2695),LINC01793(dist=151247)	7	0.268	T26L5	59287307	59337008
	Cbm_Right_X	rs10210556	2	144575729	2q22.3	T	C	0.452	T26V6	0.0545	0.0065	8.452e-17	intergenic	ARHGAP15(dist=49808),LOC101928386(dist=118905)	6	0.574	T26L6	144523686	144587692
	Cbm_Right_X	rs534865463	3	18972823	3p24.3	C	G	0.1687	T26V7	-0.0841	0.0087	7.014e-22	intergenic	SATB1-AS1(dist=401217),KCNH8(dist=217179)	6	0.946	T26L7	18939227	19028854
	Cbm_Right_X	rs1318947	4	4761862	4p16.2	A	G	0.6797	T26V8	0.0784	0.007	3.733e-29	intergenic	STX18-AS1(dist=49198),LOC101928279(dist=1625)	4	6.71	T26L8	4745726	4782575
	Cbm_Right_X	rs1291602	5	130766662	5q31.1	T	C	0.1606	T26V9	-0.0726	0.0088	1.915e-16	exonic (missense variant)	RAPGEF6	1f	23.4	T26L9	130195731	131538260
	Cbm_Right_X	rs9378547	6	8405974	6p24.3	T	C	0.3068	T26V10	-0.0447	0.007	2.057e-10	intergenic	EEF1E1-BLOC1S5(dist=303146),SLC35B3(dist=7326)	1b	1.386
	Cbm_Right_X	rs75826043	6	8538321	6p24.3	A	T	0.2251	T26V11	-0.061	0.0078	7.041e-15	ncRNA_intronic	LOC100506207	1f	2.166
	Cbm_Right_X	rs11243266	6	8658945	6p24.3	A	G	0.1846	T26V12	0.1216	0.0084	1.302e-47	ncRNA_intronic	LOC100506207	1f	2.874	T26L10	8348310	9182503
	Cbm_Right_X	rs28572384	6	9176661	6p24.3	A	G	0.2234	T26V13	-0.0746	0.0077	5.772e-22	intergenic	LOC100506207(dist=390983),TFAP2A(dist=1220249)	7	2.879
	Cbm_Right_X	rs13191889	6	35013209	6p21.31	A	G	0.4116	T26V14	0.0397	0.0066	1.609e-09	intronic	ANKS1A	1d	6.608	T26L11	34962060	35036353
	Cbm_Right_X	rs11967980	6	41374032	6p21.1	A	T	0.1771	T26V15	0.0537	0.0086	3.718e-10	intergenic	NCR2(dist=55405),LINC01276(dist=96150)	5	21.1	T26L12	41374032	41381227
	Cbm_Right_X	rs73630829	6	131707824	6q23.2	T	C	0.1157	T26V16	-0.0751	0.0102	1.559e-13	intergenic	AKAP7(dist=103152),ARG1(dist=186542)	6	0.841	T26L13	131707824	131720813
	Cbm_Right_X	rs146046839	7	115026778	7q31.2	T	C	0.9826	T26V17	0.1562	0.0249	3.245e-10	intergenic	LINC01392(dist=155369),SNORA25B(dist=194591)	5	1.866
	Cbm_Right_X	rs62474744	7	115105024	7q31.2	T	C	0.7966	T26V18	0.0683	0.0081	2.757e-17	intergenic	LINC01392(dist=233615),SNORA25B(dist=116345)	6	0.785	T26L14	114878436	115164888
	Cbm_Right_X	rs7842199	8	77631769	8q21.11	A	G	0.1346	T26V19	-0.0593	0.0095	4.407e-10	intronic	ZFHX4	1f	0.405	T26L15	77588548	77643468
	Cbm_Right_X	rs35807050	8	142040409	8q24.3	A	T	0.5864	T26V20	0.0401	0.0066	1.271e-09	intergenic	PTK2(dist=28231),DENND3(dist=98279)	1f	0.707	T26L16	142033034	142042870
	Cbm_Right_X	rs7861718	9	3924447	9p24.2	A	C	0.6972	T26V21	-0.0583	0.0072	4.851e-16	intronic	GLIS3	4	13.34	T26L17	3924447	3944778
	Cbm_Right_X	rs2991262	9	20618516	9p21.3	A	G	0.2562	T26V22	-0.0455	0.0075	1.409e-09	intronic	MLLT3	4	19.11	T26L18	20612516	20620596
	Cbm_Right_X	rs2777763	9	84180633	9q21.32	A	T	0.624	T26V23	-0.0802	0.0068	2.851e-32	intergenic	LINC01507(dist=1531163),TLE1(dist=17965)	3a	9.378	T26L19	84166882	84210665
	Cbm_Right_X	rs10759833	9	118930383	9q33.1	T	C	0.6153	T26V24	-0.0511	0.0067	1.952e-14	intronic	PAPPA	5	4.242	T26L20	118918479	119001088
	Cbm_Right_X	rs1886763	10	23482363	10p12.2	A	G	0.5327	T26V25	0.0498	0.0065	1.851e-14	intronic	PTF1A	1f	9.588	T26L21	23413461	23654182
	Cbm_Right_X	rs11597095	10	133752612	10q26.3	T	C	0.4892	T26V26	-0.0448	0.0065	5.294e-12	intronic	PPP2R2D	2a	0.988	T26L22	133751657	133799990
	Cbm_Right_X	rs2852862	11	92465067	11q14.3	A	G	0.828	T26V27	0.0559	0.0086	7.724e-11	intronic	FAT3	5	2.836	T26L23	92317533	92554716
	Cbm_Right_X	rs2446902	11	115427894	11q23.3	A	C	0.8529	T26V28	0.0582	0.0095	1.008e-09	intergenic	CADM1(dist=52761),LOC101928985(dist=174769)	2b	18.21	T26L24	115427894	115427894
	Cbm_Right_X	rs2079300	12	1117683	12p13.33	T	C	0.6264	T26V29	-0.0466	0.0067	3.14e-12	intronic	ERC1	1f	0.598	T26L25	1100637	1203608
	Cbm_Right_X	rs35872193	12	102442428	12q23.2	A	T	0.7931	T26V30	-0.0661	0.0081	2.536e-16	intronic	WASHC3	6	0.138	T26L26	102394872	102922986
	Cbm_Right_X	rs79519967	12	102850462	12q23.2	T	G	0.9911	T26V31	0.235	0.0346	1.123e-11	intronic	IGF1	5	18.48
	Cbm_Right_X	rs11111628	12	103924256	12q23.3	A	G	0.0473	T26V32	0.0938	0.0153	9.612e-10	intergenic	LOC105369945(dist=32783),LINC02401(dist=17316)	2b	21.9	T26L27	103915612	103937666
	Cbm_Right_X	rs9528612	13	63956317	13q21.31	A	C	0.5509	T26V33	0.0458	0.0065	2.528e-12	intergenic	LINC00376(dist=54090),LINC00395(dist=285498)	1f	1.59	T26L28	63945230	63971126
	Cbm_Right_X	rs10873171	14	64339648	14q23.2	T	G	0.3781	T26V34	0.0608	0.0067	1.067e-19	intronic	SYNE2	1f	4.224	T26L29	64240957	64449723
	Cbm_Right_X	rs61742642	14	76964655	14q24.3	T	C	0.0731	T26V35	-0.0855	0.0125	7.068e-12	exonic (missense variant)	ESRRB	4	25.3	T26L30	76964655	76964655
	Cbm_Right_X	rs8029518	15	96988657	15q26.2	T	C	0.5662	T26V36	-0.0607	0.0066	6.103e-20	intergenic	NR2F2(dist=105165),SPATA8-AS1(dist=326578)	1b	2.491	T26L31	96981322	97043663
	Cbm_Right_X	rs2175238	16	15251606	16p13.11	A	T	0.8348	T26V37	0.0597	0.009	3.811e-11	intergenic	MIR3180-4(dist=2747),NPIPA5(dist=205875)	2b	9.762	T26L32	14912533	15418367
	Cbm_Vermis_VI	rs7530673	1	51558856	1p32.3	A	C	0.0748	T27V1	0.0792	0.0125	2.49e-10	intergenic	MIR6500(dist=33081),C1orf185(dist=9044)	5	0.112	T27L1	51549253	51763879
	Cbm_Vermis_VI	rs1998547	1	76075556	1p31.1	C	G	0.1914	T27V2	-0.0782	0.0085	3.544e-20	intronic	SLC44A5	7	2.097	T27L2	75946751	76091842
	Cbm_Vermis_VI	rs1263603	2	207927831	2q33.3	A	G	0.5663	T27V3	-0.0489	0.0067	2.518e-13	intergenic	CPO(dist=93633),KLF7(dist=11031)	7	0.086
	Cbm_Vermis_VI	rs2269070	2	208031724	2q33.3	C	G	0.1841	T27V4	0.0596	0.0085	2.761e-12	intronic	KLF7	1f	0.146
	Cbm_Vermis_VI	rs2360675	2	208059640	2q33.3	A	C	0.5549	T27V5	0.077	0.0067	6.252e-31	ncRNA_intronic	MYOSLID-AS1	6	17.16	T27L3	207875188	208117740
	Cbm_Vermis_VI	rs56193323	2	221566883	2q36.1	A	G	0.2832	T27V6	-0.054	0.0074	2.078e-13	intergenic	MIR4268(dist=795597),EPHA4(dist=715864)	5	10.17	T27L4	221542682	221685029
	Cbm_Vermis_VI	rs6753144	2	221685029	2q36.1	A	C	0.2154	T27V7	-0.0517	0.0082	2.896e-10	intergenic	MIR4268(dist=913743),EPHA4(dist=597718)	7	2.588
	Cbm_Vermis_VI	rs73112898	3	79906738	3p12.2	A	T	0.0073	T27V8	-0.2513	0.0391	1.319e-10	intergenic	ROBO1(dist=89590),LINC02050(dist=907310)	5	9.387	T27L5	79076670	80849968
	Cbm_Vermis_VI	rs1463169	4	59732054	4q13.1	T	C	0.2416	T27V9	-0.0603	0.0077	4.849e-15	intergenic	LINC02494(dist=329561),LINC02429(dist=117946)	7	0.055	T27L6	59674231	59838876
[truncated: 263 more rows]

## Sheet: TableS9
Table S9. Significant independent signals and loci in sex-combined single-dataset GWASs (P < 1.61 × 10-9).
[truncated: 491 more rows]

[truncated: 34 more sheets: TableS10, TableS11, TableS12, TableS13, TableS14, TableS15, TableS16, TableS17, TableS18, TableS19, TableS20, TableS21, TableS22, TableS23, TableS24, TableS25, TableS26, TableS27, TableS28, TableS29 …]
